# Supplementary material for: Epigenetic Drift Association with Cancer Risk and Survival, and Modification by Sex
Source: Cancers (Basel). 2021 Apr 14;13(8):1881. doi: 10.3390/cancers13081881 (PMC8070898; doi:10.3390/cancers13081881)
Supplement: Supplementary file 1 [file cancers-13-01881-s001.zip › cancers-1166912-supplementary tables.xlsx]

## Sheet: Table S1
Table S1. Characteristics of the participants from seven specific studies in the MCCS sample.
Characteristics	Colorectal cancer (N=835 pairs)		Gastric cancer (N=170 pairs)		Kidney cancer (N=143 pairs)		Lung cancer (N=332 pairs)		Prostate cancer (N=869 pairs)		urothelial cancer (N=428 pairs)		Mature B-cell lymphoma (N=438 pairs)
	case	control	case	control	case	control	case	control	case	control	case	control	case	control
Age at blood draw, median [IQR]	61.6 [54.8-66.1]	61 [54.4-65.5]	61.2 [56.5-65.6]	62.2 [56.9-65.6]	58.7 [49.7-64.1]	58.8 [49.5-63.9]	61 [54.6-65.2]	60.9 [54.6-65]	60.6 [53.9-65.4]	60.5 [53.9-65.4]	65.3 [60.1-69.4]	65.6 [60.2-69.2]	60 [52.8-65.5]	60.3 [52.4-65.3]
Sex:
male, N (%)	411 (49%)	411 (49%)	113 (66%)	113 (66%)	83 (58%)	83 (58%)	212 (64%)	212 (64%)	869 (100%)	869 (100%)	328 (77%)	328 (77%)	221 (50%)	221 (50%)
female, N (%)	424 (51%)	424 (51%)	57 (34%)	57 (34%)	60 (42%)	60 (42%)	120 (36%)	120 (36%)			100 (23%)	100 (23%)	217 (50%)	217 (50%)
Country of birth:
Australia/NZ, N (%)	591 (71%)	583 (70%)	80 (47%)	79 (46%)	92 (64%)	92 (64%)	203 (61%)	203 (61%)	625 (72%)	626 (72%)	257 (60%)	262 (61%)	314 (72%)	303 (69%)
Greece, N (%)	76 (9%)	76 (9%)	39 (23%)	39 (23%)	20 (14%)	20 (14%)	34 (10%)	42 (13%)	70 (8%)	70 (8%)	56 (13%)	56 (13%)	39 (9%)	44 (10%)
Italy, N (%)	127 (15%)	119 (14%)	41 (24%)	43 (25%)	24 (17%)	24 (17%)	67 (20%)	63 (19%)	102 (12%)	110 (13%)	80 (19%)	82 (19%)	64 (15%)	62 (14%)
UK/other, N (%)	41 (5%)	57 (7%)	10 (6%)	9 (5%)	7 (5%)	7 (5%)	28 (8%)	24 (7%)	72 (8%)	63 (7%)	35 (8%)	28 (7%)	21 (5%)	29 (7%)
Blood sample type:
Dried blood spots, N (%)	584 (70%)	584 (70%)	104 (61%)	104 (61%)	105 (73%)	105 (73%)	228 (69%)	228 (69%)	686 (79%)	686 (79%)	175 (41%)	175 (41%)	316 (72%)	316 (72%)
Peripheral blood mononuclear cells, N (%)	240 (29%)	240 (29%)	60 (35%)	60 (35%)	30 (21%)	30 (21%)	101 (30%)	101 (30%)	173 (20%)	173 (20%)	96 (22%)	96 (22%)	117 (27%)	117 (27%)
Buffy coats, N (%)	11 (1%)	11 (1%)	6 (4%)	6 (4%)	8 (6%)	8 (6%)	3 (1%)	3 (1%)	10 (1%)	10 (1%)	157 (37%)	157 (37%)	5 (1%)	5 (1%)
Smoking:
current, N (%)	100 (12%)	91 (11%)	27 (16%)	26 (15%)	20 (14%)	15 (10%)	150 (45%)	150 (45%)	77 (9%)	97 (11%)	73 (17%)	52 (12%)	43 (10%)	37 (8%)
former, N (%)	301 (36%)	279 (33%)	64 (38%)	67 (39%)	51 (36%)	43 (30%)	143 (43%)	143 (43%)	407 (47%)	407 (47%)	230 (54%)	194 (45%)	153 (35%)	152 (35%)
never, N (%)	434 (52%)	465 (56%)	79 (46%)	77 (45%)	72 (50%)	85 (59%)	39 (12%)	39 (12%)	385 (44%)	365 (42%)	125 (29%)	182 (43%)	242 (55%)	249 (57%)
Smoking pack-years, median [IQR]	0 [0-22.5]	0 [0-17.75]	2.35 [0-24.7]	2.55 [0-29.5]	0 [0-23.65]	0 [0-16.4]	39.1 [15-60]	30 [9.8-50.2]	3 [0-26]	4.5 [0-28.5]	16.95 [0-38.4]	4.85 [0-27.95]	0 [0-14]	0 [0-20.8]
Body mass index (kg/m2), median [IQR]	27 [24.4-29.8]	26.5 [24-29.3]	27.3 [25.2-30.7]	27.7 [25.5-29.6]	27.7 [25.3-30.3]	26.4 [24.5-29.5]	26.2 [23.8-28.7]	27.5 [24.7-29.8]	26.8 [24.9-29.3]	26.7 [24.7-29]	27.3 [24.9-29.8]	27.1 [24.6-29.6]	26.7 [24.2-29.3]	26.9 [24.5-29.4]
Alcohol consumption (g/day), median [IQR]	4.3 [0-17.7]	3.7 [0-15.6]	3.8 [0-19]	2.1 [0-16.5]	2.1 [0-12.9]	2.1 [0-18.9]	6.6 [0-25.7]	5.6 [0-20.3]	7.5 [0-24.2]	8.6 [0-23.1]	7.1 [0-24.1]	7.5 [0-21.7]	2.1 [0-15]	2.1 [0-15]

## Sheet: Table S2
Table S2: 32,659 replicated age-associated CpGs using the MCCS sample.
CpG	CHR	MAPINFO	Strand	Gene	Gene feature	Control_beta	Control_se	Control_P	Case_beta	Case_se	Case_P
cg16867657	6	11044877	F	ELOVL2	TSS1500	0.565527	0.0129008	0	0.549648	0.0134047	0
cg24724428	6	11044888	F	ELOVL2	TSS1500	0.445404	0.0132949	4.53825e-246	0.405262	0.0130778	7.68133e-211
cg21572722	6	11044894	F	ELOVL2	TSS1500	0.468083	0.0150311	6.71785e-213	0.454201	0.0151742	7.45749e-197
cg22454769	2	106015767	R	FHL2	TSS200	0.485736	0.0160775	1.64401e-200	0.43854	0.0168336	1.29298e-149
cg06639320	2	106015739	R	FHL2	TSS200	0.456132	0.0164656	6.57308e-169	0.440709	0.016895	5.37162e-150
cg07553761	3	160167977	F	TRIM59	TSS1500	0.396344	0.014377	2.69348e-167	0.363146	0.015049	1.18683e-128
cg08097417	7	130419133	R	KLF14	TSS1500	0.421918	0.0166255	4.43936e-142	0.411708	0.0173221	7.18303e-125
cg17110586	19	36454623	F			0.336491	0.0135042	4.80756e-137	0.303908	0.0135385	1.34763e-111
cg04875128	15	31775895	R	OTUD7A	Body	0.427833	0.0172095	2.00232e-136	0.413837	0.0178815	1.69641e-118
cg24079702	2	106015771	R	FHL2	TSS200	0.387858	0.0157696	1.4186e-133	0.366243	0.0164285	4.30746e-110
cg14361627	7	130419116	R	KLF14	TSS1500	0.4181	0.0172931	3.8559e-129	0.396544	0.0179171	1.54806e-108
cg10501210	1	207997020	F			-0.297125	0.0123076	9.13443e-129	-0.290249	0.0126965	1.14853e-115
cg00059225	5	151304357	F	GLRA1	1stExon	0.297343	0.0123577	6.35539e-128	0.273993	0.0121712	3.19344e-112
cg23500537	5	140419819	R			0.411719	0.0175345	6.44722e-122	0.383276	0.0183648	1.0009e-96
cg08262002	4	16575323	F	LDB2	Body	-0.383219	0.0165927	5.12443e-118	-0.352464	0.0169407	3.83971e-96
cg14556683	19	15342982	R	EPHX3	1stExon	0.350977	0.0156052	5.06987e-112	0.308581	0.0165309	9.19137e-78
cg19344626	19	16830749	R	NWD1	TSS200	-0.365231	0.0164835	8.84484e-109	-0.309649	0.0175509	1.15399e-69
cg06784991	1	53308768	R	ZYG11A	Body	0.374776	0.0169735	4.90528e-108	0.351254	0.0175615	5.36138e-89
cg22796704	10	49673534	F	ARHGAP22	Body	-0.271207	0.0123735	1.73443e-106	-0.258743	0.0127241	6.31139e-92
cg11705975	10	120354248	R	PRLHR	Body	0.323861	0.0149487	4.41065e-104	0.295079	0.0150204	6.36105e-86
cg07082267	16	85429035	R			-0.308116	0.0142343	6.62207e-104	-0.297024	0.0147767	7.25285e-90
cg06570224	3	157812475	F			0.293599	0.0137035	7.79456e-102	0.270493	0.0134418	4.61857e-90
cg00862117	12	176111	F	IQSEC3	1stExon	0.302621	0.0142141	1.39927e-100	0.217531	0.0147382	2.66486e-49
cg19560758	1	8086721	F	ERRFI1	TSS1500	0.303116	0.014326	2.30731e-99	0.251897	0.0145265	2.32695e-67
cg15480367	14	93389485	F	CHGA	5'UTR	0.340041	0.0160865	3.53597e-99	0.302534	0.0166021	3.41288e-74
cg19392831	10	120355756	F	PRLHR	TSS1500	0.286303	0.0137195	1.03984e-96	0.285614	0.0137399	5.65099e-96
cg19784428	19	16830746	R	NWD1	TSS200	-0.342867	0.0164612	2.37245e-96	-0.284618	0.017485	1.41908e-59
cg00748589	12	11653486	R			0.311401	0.0149541	2.63665e-96	0.271085	0.0154722	9.95298e-69
cg23744638	11	10323902	R			-0.31712	0.0153516	8.43041e-95	-0.320732	0.0158922	1.41723e-90
cg09809672	1	236557682	R	EDARADD	TSS1500	-0.342975	0.016617	1.20173e-94	-0.331831	0.0167477	2.27705e-87
cg10320659	20	62959262	R			0.315937	0.0153222	1.83343e-94	0.261574	0.0159398	1.62015e-60
cg11970349	4	8582287	R	GPR78	TSS200	0.338174	0.0164137	2.57267e-94	0.327514	0.0162187	1.11464e-90
cg20249566	19	16830739	R	NWD1	TSS200	-0.342454	0.0166441	4.57995e-94	-0.306889	0.0176541	1.10033e-67
cg19671120	2	98962974	F	CNGA3	1stExon	0.238506	0.0116009	6.3514e-94	0.205155	0.0117461	2.61252e-68
cg07955995	7	130419159	R	KLF14	TSS1500	0.371396	0.0181453	4.16552e-93	0.328506	0.0189746	3.75753e-67
cg02650266	4	147558239	F			0.286702	0.014014	5.06711e-93	0.282128	0.014292	9.7163e-87
cg19283806	18	66389420	F	CCDC102B	5'UTR	-0.372912	0.0182664	1.22659e-92	-0.335134	0.0178804	2.20518e-78
cg24466241	1	53308908	F	ZYG11A	Body	0.295171	0.014481	2.34781e-92	0.26068	0.0154177	3.94175e-64
cg16008966	1	114761794	F			-0.343103	0.0168476	3.41107e-92	-0.319756	0.0173738	1.21011e-75
cg07547549	20	44658225	R	SLC12A5	Body	0.305528	0.0150805	2.91374e-91	0.322749	0.0154021	1.69426e-97
cg14674720	2	219827930	F			0.296983	0.0147166	1.46518e-90	0.264105	0.0151171	2.40166e-68
cg04940570	11	12696758	R	TEAD1	5'UTR	0.321369	0.0159351	1.89616e-90	0.265459	0.0166235	2.10421e-57
cg06493994	6	25652602	R	SCGN	1stExon	0.31896	0.0158469	4.23167e-90	0.300943	0.016065	2.67217e-78
cg03473532	7	131008743	R	MKLN1	Body	-0.340349	0.0169477	1.05308e-89	-0.321095	0.0176272	3.86309e-74
cg00292135	7	156433068	R	C7orf13	Body	0.319084	0.0159248	2.62608e-89	0.294442	0.016378	2.89956e-72
cg01528542	12	81468232	F			-0.327998	0.0165019	6.52358e-88	-0.327123	0.0166609	7.89341e-86
cg08128734	1	206685423	R	RASSF5	Body	-0.35482	0.0178767	1.14352e-87	-0.379256	0.018334	4.63559e-95
cg23606718	2	131513927	F	FAM123C	5'UTR	0.312287	0.0158048	6.70756e-87	0.260265	0.0160021	1.76483e-59
cg13823169	9	139776893	R			-0.315016	0.0160014	2.80118e-86	-0.342693	0.015803	2.82458e-104
cg27209729	11	64428925	F	NRXN2	Body	-0.320172	0.0162748	3.67933e-86	-0.298648	0.0169814	3.11439e-69
cg15845821	19	16830613	R	NWD1	TSS200	-0.333127	0.0169949	1.5001e-85	-0.307647	0.0171448	5.34697e-72
cg17471102	19	5851255	F	FUT3	5'UTR	-0.315291	0.0160998	2.1391e-85	-0.295875	0.0170718	2.73343e-67
cg25994988	11	122652382	F	UBASH3B	Body	-0.325983	0.0166485	2.27321e-85	-0.30174	0.0163827	9.39985e-76
cg18933331	1	110186418	R			-0.293676	0.0150425	6.99464e-85	-0.287762	0.0151967	5.7743e-80
cg11807280	2	66654644	F			-0.340637	0.0175558	7.26624e-84	-0.295665	0.0182665	6.31342e-59
cg15341124	14	102027734	R	DIO3	5'UTR	0.282991	0.0146096	1.37638e-83	0.25143	0.0150427	1.02825e-62
cg01606885	5	53765871	F			-0.326202	0.016854	1.86374e-83	-0.278252	0.0167976	1.24739e-61
cg23078123	1	68577796	F	GPR177	Body	-0.330229	0.0170712	2.28267e-83	-0.291248	0.0172736	8.73551e-64
cg16054275	1	169556022	F	F5	TSS1500	-0.341387	0.0177113	8.68926e-83	-0.329305	0.0177143	3.88746e-77
cg13327545	10	22623548	R			0.252811	0.0132024	9.88829e-82	0.234594	0.013757	3.33901e-65
cg11071401	17	48637194	F	CACNA1G	TSS1500	0.267821	0.0140029	1.53106e-81	0.275068	0.0129701	8.09553e-100
cg15618978	3	160167990	F	TRIM59	TSS1500	0.297001	0.0155642	3.54372e-81	0.285997	0.0160387	4.01067e-71
cg05991454	4	147558435	F			0.292016	0.0153278	6.39651e-81	0.247943	0.0162188	9.27978e-53
cg00484358	1	110610995	R	ALX3	Body	0.29008	0.0152279	6.66633e-81	0.285534	0.0155613	3.36094e-75
cg06335143	1	53308654	R	ZYG11A	Body	0.326718	0.0171515	6.69994e-81	0.322541	0.0177792	1.4985e-73
cg16015712	1	53308597	F	ZYG11A	1stExon	0.350592	0.0184049	6.71715e-81	0.342297	0.0187791	3.11866e-74
cg01820374	12	6882083	R	LAG3	Body	-0.334969	0.0176165	1.29361e-80	-0.309975	0.01841	1.30111e-63
cg14692377	17	28562685	R	SLC6A4	1stExon	0.290723	0.015317	2.47728e-80	0.237903	0.0158534	6.6599e-51
cg22736354	6	18122719	F	NHLRC1	1stExon	0.327548	0.0172846	4.3969e-80	0.320128	0.0179374	3.05133e-71
cg13848598	10	115804578	F	ADRB1	1stExon	0.309605	0.0163705	9.02822e-80	0.249212	0.0166761	1.69823e-50
cg13649056	9	136474626	R			0.306533	0.0162547	2.52109e-79	0.267064	0.0163529	5.91059e-60
cg06782035	5	16179135	F	2011-03-01	Body	0.311799	0.0166111	1.31412e-78	0.311048	0.0168308	2.94472e-76
cg00094518	7	130418549	F	KLF14	1stExon	0.301313	0.0160901	3.00245e-78	0.277688	0.0170969	2.54623e-59
cg05316627	6	87861261	R			-0.291721	0.0155879	3.76645e-78	-0.263422	0.0163964	4.43013e-58
cg13501527	9	123640474	R	PHF19	TSS1500	-0.31782	0.0170777	2.65594e-77	-0.255555	0.0165423	7.71507e-54
cg25778262	12	69327449	F	CPM	TSS1500	0.27337	0.0147221	5.76333e-77	0.238836	0.0152775	4.32482e-55
cg19991948	10	121335173	F	TIAL1	3'UTR	-0.285245	0.0153728	7.40336e-77	-0.204992	0.015163	1.20434e-41
cg06942685	19	56879432	R	ZNF542	TSS1500	0.265198	0.0143355	2.08747e-76	0.231544	0.0148591	9.56177e-55
cg00741624	14	93897389	R	KIAA1409	5'UTR	0.273286	0.0148585	1.50762e-75	0.227807	0.0147456	7.64245e-54
cg13954457	5	167956819	R	FBLL1	Body	0.289507	0.0157424	1.57261e-75	0.236322	0.0159339	9.18332e-50
cg11220950	16	2042693	R	SYNGR3	Body	0.310779	0.0169013	1.64205e-75	0.307879	0.016838	1.0948e-74
cg07583137	8	82644012	R	CHMP4C	TSS1500	-0.308499	0.0167963	2.41022e-75	-0.297082	0.0170233	3.351e-68
cg20591472	1	110008990	R	SYPL2	TSS200	0.273619	0.014907	3.00749e-75	0.269737	0.0146217	5.44692e-76
cg04503319	16	89368367	R	ANKRD11	Body	-0.246632	0.0134414	3.37742e-75	-0.170774	0.0155671	5.31842e-28
cg02402091	10	114135092	F	ACSL5	TSS1500	-0.312012	0.017017	4.32515e-75	-0.288483	0.0165395	3.95228e-68
cg12317815	17	3379283	F	ASPA	TSS200	-0.325409	0.01776	5.469e-75	-0.302441	0.0180428	4.59313e-63
cg11084334	3	9594264	R	LHFPL4	Body	0.287517	0.0157266	1.14687e-74	0.277513	0.0157744	2.80509e-69
cg01234420	22	46453808	F	LOC150381	Body	-0.247706	0.0135605	1.52269e-74	-0.25898	0.0138209	2.41218e-78
cg16932827	3	193988639	F			-0.297811	0.016309	1.70435e-74	-0.290058	0.0167868	6.78072e-67
cg03555227	5	170289070	R	RANBP17	Body	0.24416	0.0133894	2.70762e-74	0.211285	0.013473	2.0052e-55
cg18651026	6	33140660	R	COL11A2	Body	-0.295573	0.0162401	5.1389e-74	-0.310036	0.0165382	2.06127e-78
cg07931844	15	72102213	R	NR2E3	TSS1500	-0.259395	0.014283	1.04947e-73	-0.257734	0.0141559	4.55528e-74
cg17592231	11	43604758	R			0.237243	0.0130637	1.05978e-73	0.224039	0.0136579	1.80108e-60
cg03738025	6	105388694	F			0.269466	0.0148753	2.42477e-73	0.263216	0.0145918	9.70146e-73
cg23479922	5	16179633	F	2011-03-01	1stExon	0.272119	0.0150298	2.89085e-73	0.214931	0.0152768	5.88191e-45
cg20988565	8	106334333	F	ZFPM2	Body	-0.337727	0.0186777	4.43601e-73	-0.321593	0.0188726	4.13158e-65
cg02228185	17	3379567	F	ASPA	1stExon	-0.334942	0.0185238	4.43692e-73	-0.317759	0.0189093	2.26749e-63
cg15979173	1	91182128	F	BARHL2	1stExon	0.248498	0.0137606	6.73417e-73	0.230287	0.0135733	1.46161e-64
cg01770755	15	41914122	F			0.260761	0.0144611	1.09535e-72	0.225474	0.0142751	3.37176e-56
cg10804656	10	22623460	F			0.278847	0.0154671	1.16466e-72	0.256366	0.0154466	7.33181e-62
cg10806820	3	48699090	R	CELSR3	1stExon	0.292382	0.0162273	1.40928e-72	0.237164	0.0163637	1.3356e-47
cg22943590	2	66648797	F			-0.324333	0.0180055	1.53997e-72	-0.272599	0.0188372	1.84003e-47
cg16582779	14	29237202	R	FOXG1	1stExon	0.249948	0.0138883	2.05519e-72	0.180665	0.0140608	8.73778e-38
cg03474926	9	136023407	R	RALGDS	Body	-0.311343	0.0173221	3.12807e-72	-0.297044	0.0164958	1.70822e-72
cg09499629	7	130419136	F	KLF14	TSS1500	0.323546	0.0180282	5.10055e-72	0.29397	0.0189812	4.21667e-54
cg05168491	14	38080446	F			0.230281	0.0128348	5.54668e-72	0.232964	0.0129633	3.28654e-72
cg17861230	19	18343901	R	PDE4C	Body	0.274547	0.0153046	5.85917e-72	0.236324	0.0162631	7.67173e-48
cg07060551	19	51198381	F	SHANK1	Body	0.256491	0.0143523	1.98016e-71	0.229525	0.0140429	4.75751e-60
cg21911021	19	58095011	F	ZIK1	TSS1500	0.295799	0.0165654	2.5759e-71	0.280606	0.0165641	2.25905e-64
cg20273670	17	21356245	R			0.300387	0.0168289	2.91481e-71	0.30013	0.0178344	1.50285e-63
cg09124496	7	41735851	F	LOC285954	Body	-0.308024	0.0173004	6.52401e-71	-0.243088	0.0178594	3.43368e-42
cg17321954	3	120626881	R	STXBP5L	TSS200	0.281271	0.0158031	7.25987e-71	0.261527	0.0158688	5.05717e-61
cg07336350	16	54322127	R			0.279042	0.0156832	8.08711e-71	0.227812	0.0150449	8.53234e-52
cg20747538	3	137838021	F			-0.304838	0.0171748	1.7517e-70	-0.317112	0.0169799	7.80076e-78
cg20809087	15	72612221	F	BRUNOL6	5'UTR	0.311057	0.0175524	2.85319e-70	0.275995	0.0172688	1.69719e-57
cg10906284	12	63544430	F	AVPR1A	1stExon	0.240349	0.0136177	1.02299e-69	0.191529	0.0139761	9.60188e-43
cg25410668	1	28241577	R	RPA2	TSS1500	0.318677	0.01806	1.10268e-69	0.32405	0.0181659	3.55557e-71
cg17939805	18	44773988	F			0.253894	0.0143998	1.40452e-69	0.203765	0.0146791	8.22374e-44
cg08160331	11	75140865	F	KLHL35	1stExon	0.274364	0.0155657	1.55209e-69	0.282613	0.0150671	1.69918e-78
cg11693709	15	40542019	F	PAK6	5'UTR	-0.245763	0.0139974	5.19526e-69	-0.20805	0.0139315	1.98577e-50
cg15084543	1	79472408	R	ELTD1	5'UTR	0.220399	0.0125706	8.03604e-69	0.223912	0.0125264	1.84036e-71
cg24847230	17	46986807	R	UBE2Z	Body	-0.292852	0.0167045	8.26634e-69	-0.258359	0.0171272	2.04161e-51
cg03032497	14	61108227	R			0.324028	0.0185212	1.56617e-68	0.315697	0.0187473	1.25115e-63
cg10616795	5	76464212	R			-0.30845	0.0176367	1.73464e-68	-0.277158	0.0183421	1.38002e-51
cg19855470	22	40060836	R	CACNA1I	Body	0.258163	0.0147788	2.49157e-68	0.219823	0.0155377	1.92784e-45
cg17326555	1	119535693	R			0.241523	0.0138379	3.22678e-68	0.244514	0.0141809	1.2731e-66
cg22016779	2	230452311	R	DNER	Body	-0.315395	0.0180741	3.4349e-68	-0.309862	0.0186375	4.53871e-62
cg08445802	6	85482612	R			0.24767	0.0142137	5.35344e-68	0.231375	0.0141264	2.70785e-60
cg11436113	20	19191145	R			-0.292507	0.0167978	6.53465e-68	-0.280761	0.0166489	8.33668e-64
cg22158769	2	39187539	F	LOC375196	TSS200	0.310464	0.0178424	8.20819e-68	0.277619	0.0186867	6.31532e-50
cg25256723	1	169555944	F	F5	TSS200	-0.315473	0.0181682	1.54568e-67	-0.318209	0.0185142	3.30537e-66
cg25351606	6	100917427	F			0.231943	0.0133678	1.94195e-67	0.183283	0.0137541	1.64149e-40
cg17916490	2	11810173	R	NTSR2	1stExon	0.28466	0.0164084	2.02679e-67	0.220794	0.0171562	6.67222e-38
cg23893898	4	6247571	R			0.261113	0.0150541	2.15412e-67	0.19048	0.0153419	2.14938e-35
cg11763509	1	39958005	R	BMP8A	Body	0.256976	0.0148259	2.65591e-67	0.214133	0.0149462	1.4859e-46
cg26350754	6	33043868	F	HLA-DPB1	1stExon	-0.311419	0.0180248	6.97717e-67	-0.329757	0.0182609	6.81179e-73
cg12742799	20	62959193	R			0.235815	0.0136571	8.36142e-67	0.192378	0.013623	2.7987e-45
cg23368787	19	36049342	F	ATP4A	Body	0.251137	0.0145515	9.65582e-67	0.210271	0.0152813	4.43328e-43
cg18587063	11	122940457	F			-0.293024	0.0169866	1.11183e-66	-0.272313	0.0172686	5.06061e-56
cg19500607	5	148034319	F	HTR4	TSS1500	-0.297615	0.0172812	1.81877e-66	-0.266591	0.0177904	9.18304e-51
cg07254032	5	45695839	R	HCN1	1stExon	0.227714	0.0132343	2.38075e-66	0.202159	0.0132366	1.16255e-52
cg16385335	11	71710614	F	IL18BP	TSS200	-0.288082	0.0167543	2.92113e-66	-0.225774	0.0160612	6.96217e-45
cg08090640	17	41159289	R	IFI35	Body	-0.298315	0.0173597	3.48029e-66	-0.302173	0.0169398	3.58004e-71
cg22285878	7	130419173	R	KLF14	TSS1500	0.309988	0.018043	3.71603e-66	0.266277	0.0191061	3.7881e-44
cg07544187	19	19651235	F	CILP2	Body	0.277271	0.0161481	4.41654e-66	0.257443	0.0164071	1.74523e-55
cg18618815	17	48275324	F	COL1A1	Body	-0.302645	0.0176327	4.94762e-66	-0.300146	0.0176046	3.54099e-65
cg02287710	14	102027660	F	DIO3	TSS200	0.225113	0.0131163	5.03461e-66	0.216863	0.0134216	1.00209e-58
cg18184411	1	53309261	F	ZYG11A	Body	0.279623	0.0163055	6.38868e-66	0.193867	0.0170057	4.1757e-30
cg12534424	7	127992316	R	PRRT4	Body	0.271689	0.0158442	6.56344e-66	0.276853	0.01667	6.10942e-62
cg25427880	10	102322128	R			0.312419	0.018244	9.74698e-66	0.329802	0.0186555	6.1349e-70
cg25124276	10	25464008	R	LOC100128811	Body	0.260361	0.0152056	1.00397e-65	0.23885	0.0154988	1.38342e-53
cg14042143	7	2646782	R	IQCE	Body	-0.240547	0.0140855	2.1771e-65	-0.205162	0.0144574	1.04494e-45
cg03614193	18	55021542	F	ST8SIA3	Body	0.247851	0.0145316	3.15365e-65	0.248911	0.0142895	5.90535e-68
cg21469505	18	47085749	R			-0.280571	0.01645	3.15479e-65	-0.27752	0.0164713	1.0732e-63
cg06942701	2	162280009	R	TBR1	Body	0.230095	0.01352	5.95564e-65	0.193248	0.0142761	9.52978e-42
cg04193015	17	35596680	F	ACACA	Body	-0.235906	0.0138659	6.52661e-65	-0.203769	0.0145994	2.83847e-44
cg00602811	2	145278564	F	ZEB2	TSS1500	-0.205204	0.01207	8.0403e-65	-0.205082	0.0124176	2.84309e-61
cg01820962	6	116511817	R	NT5DC1	Body	-0.28531	0.0167912	9.47056e-65	-0.256897	0.0172064	2.09173e-50
cg13933080	10	22634145	F	SPAG6	TSS1500	0.241764	0.0142308	9.93901e-65	0.213521	0.0141741	2.78713e-51
cg14001664	2	132088801	R			0.242409	0.0142708	1.03651e-64	0.20079	0.0151175	2.94391e-40
cg11139646	1	40253815	F	BMP8B	Body	0.25177	0.0148396	1.46415e-64	0.21154	0.0156099	7.74131e-42
cg12765028	4	13526659	R			0.220084	0.0130008	2.7733e-64	0.217312	0.0126497	3.80001e-66
cg08550421	5	140305947	F	PCDHA7	Body	0.286097	0.0169106	3.30328e-64	0.232192	0.0167171	7.3322e-44
cg25371036	11	94500749	R	AMOTL1	TSS1500	-0.257526	0.0152964	1.33655e-63	-0.259762	0.0162269	1.12119e-57
cg18215449	12	66089473	F			-0.29386	0.0174555	1.35656e-63	-0.27403	0.0172612	9.37502e-57
cg18292202	6	26746947	F			0.226975	0.0134845	1.4148e-63	0.178797	0.0132754	2.40276e-41
cg05308819	1	155959156	R			-0.208401	0.0123855	1.56611e-63	-0.205079	0.0137768	4.07868e-50
cg23331484	19	33718148	F	SLC7A10	TSS1500	0.249551	0.0148345	1.67227e-63	0.202074	0.0151161	9.28054e-41
cg16512661	5	2743620	R			0.225537	0.0134099	1.78096e-63	0.200211	0.0139186	6.4871e-47
cg24892069	10	33562205	R	NRP1	Body	-0.261377	0.0155444	1.8999e-63	-0.253877	0.0156256	2.32712e-59
cg04671742	12	6881997	F	LAG3	1stExon	-0.281975	0.0168069	3.57763e-63	-0.231972	0.0178873	1.84479e-38
cg08857994	2	130763641	F			0.239752	0.0142918	3.68526e-63	0.201278	0.0146562	6.41593e-43
cg08153621	19	53561441	R			0.250915	0.0149647	4.24758e-63	0.181228	0.0158694	3.32169e-30
cg03262554	9	136474735	F			0.275332	0.0164411	5.99491e-63	0.217998	0.0173393	2.9916e-36
cg01812045	2	220283739	F	DES	1stExon	0.279874	0.016721	6.93862e-63	0.21461	0.0170581	2.68368e-36
cg00260802	20	21372203	F			0.223265	0.0133439	7.72152e-63	0.185923	0.0142795	9.3861e-39
cg06335867	7	8482325	F	NXPH1	Body	0.216433	0.0129424	8.94891e-63	0.183035	0.0128103	2.5944e-46
cg03224418	20	62611858	F	SAMD10	TSS1500	-0.306789	0.0183476	9.22261e-63	-0.31302	0.0185757	1.03101e-63
cg13654588	10	120354081	R	PRLHR	Body	0.246538	0.0147562	1.15733e-62	0.189552	0.0151265	5.04864e-36
cg18338984	7	2646955	R	IQCE	Body	-0.177242	0.0106141	1.34099e-62	-0.136821	0.0110572	3.61519e-35
cg11254700	19	53561386	R			0.194726	0.0116665	1.52287e-62	0.162085	0.0116991	1.19439e-43
cg01844642	3	51989764	R	GPR62	1stExon	0.299595	0.017959	1.76689e-62	0.293022	0.0185613	3.84001e-56
cg11142333	1	173840261	F	ZBTB37	Body	-0.279082	0.0167494	2.46497e-62	-0.232694	0.0170629	2.39933e-42
cg04208403	16	49525807	F	ZNF423	Body	-0.253461	0.0152176	2.74723e-62	-0.249002	0.0156984	1.1691e-56
cg01422881	1	44873692	F	RNF220	5'UTR	0.223258	0.0134132	3.3072e-62	0.143485	0.0141389	3.37366e-24
cg04792712	8	17271105	F	MTMR7	TSS200	0.212895	0.0128117	5.22386e-62	0.172014	0.0127407	1.54082e-41
cg18322569	1	91182777	F	BARHL2	5'UTR	0.244337	0.0147297	8.50505e-62	0.203227	0.014574	3.4009e-44
cg15824707	15	45403733	F	DUOX2	Body	0.240926	0.0145245	8.56825e-62	0.215804	0.0149212	2.07817e-47
cg19165390	18	56932082	R			0.206836	0.0124755	9.8352e-62	0.172524	0.0120833	3.00875e-46
cg03236802	6	32055316	F	TNXB	Body	0.266168	0.0160591	1.06859e-61	0.250976	0.0167786	1.37831e-50
cg18902090	5	140306249	F	PCDHA7	Body	0.262985	0.0158741	1.20768e-61	0.225622	0.0157546	1.61789e-46
cg12597389	7	8482235	R	NXPH1	Body	0.232178	0.0140149	1.21667e-61	0.205419	0.014638	9.76316e-45
cg25391162	9	118091	F	FOXD4	1stExon	0.199955	0.0120715	1.26362e-61	0.170837	0.0124634	9.20774e-43
cg16604658	12	64847188	F	TBK1	5'UTR	-0.262513	0.0158508	1.32185e-61	-0.271689	0.0163349	4.06139e-62
cg19518666	4	157692845	F	PDGFC	Body	-0.2923	0.0176558	1.46135e-61	-0.274103	0.0185953	3.54584e-49
cg21186955	7	100729412	R	TRIM56	5'UTR	-0.306096	0.0184904	1.49111e-61	-0.27907	0.0190201	9.68664e-49
cg12878812	12	119419696	F	SRRM4	1stExon	0.24923	0.0150567	1.52916e-61	0.257232	0.0157444	5.29378e-60
cg01352175	18	44773985	F			0.242605	0.0146607	1.65477e-61	0.202539	0.0151567	9.94488e-41
cg17372101	7	147500722	F	CNTNAP2	Body	-0.294754	0.0178197	1.86217e-61	-0.256494	0.0183796	2.91865e-44
cg18898125	8	24770381	F	NEFM	TSS1500	0.262628	0.0158828	2.04053e-61	0.236658	0.0168525	8.5224e-45
cg17280346	3	147126703	F	ZIC1	TSS1500	0.26195	0.0158418	2.04094e-61	0.278001	0.0159554	5.45479e-68
cg26847866	8	27492077	R	SCARA3	Body	-0.217856	0.0131848	2.49189e-61	-0.181667	0.0128771	3.4046e-45
cg16717122	15	51973920	R	SCG3	5'UTR	0.249852	0.0151243	2.6397e-61	0.231625	0.0162786	6.06689e-46
cg04090392	15	83952774	F	BNC1	Body	0.251203	0.0152131	2.99576e-61	0.233364	0.0150614	3.80019e-54
cg22282410	7	158380884	R	PTPRN2	TSS1500	0.26242	0.0159138	4.32132e-61	0.222422	0.0162984	2.10633e-42
cg12377139	10	22634218	R	SPAG6	TSS200	0.254045	0.0154381	7.63181e-61	0.197371	0.0157669	5.94709e-36
cg07080372	11	796607	R	SLC25A22	TSS1500	-0.29181	0.0177561	1.08575e-60	-0.303849	0.0179982	6.08421e-64
cg16419235	8	57360613	R	PENK	TSS1500	0.231999	0.0141379	1.62898e-60	0.244176	0.0147749	2.36799e-61
cg21874213	5	139229292	R	NRG2	Body	-0.280601	0.0170998	1.6316e-60	-0.271995	0.0180929	4.44503e-51
cg23715749	1	37413867	F	GRIK3	Body	-0.284237	0.0173325	1.94248e-60	-0.280671	0.0176601	7.08902e-57
cg10943359	4	165304531	R	2001-03-01	TSS200	0.212383	0.0129584	2.26794e-60	0.168363	0.0136805	8.32447e-35
cg05933904	16	1032266	R	SOX8	1stExon	0.248329	0.0151577	2.52826e-60	0.202075	0.0155655	1.54256e-38
cg22927302	3	50304463	R	SEMA3B	TSS1500	-0.278713	0.0170339	3.55542e-60	-0.24988	0.0170807	1.8258e-48
cg26725076	12	132569963	F	EP400NL	Body	-0.292743	0.0179074	4.52237e-60	-0.284104	0.0185361	5.04477e-53
cg23026864	5	140306231	F	PCDHA7	Body	0.257487	0.0157557	4.92171e-60	0.221539	0.01639	1.24668e-41
cg12757011	2	162281111	R	TBR1	3'UTR	0.27578	0.0168806	5.37273e-60	0.246441	0.0166403	1.26454e-49
cg16960758	2	169658992	R	NOSTRIN	5'UTR	-0.276262	0.0169108	5.43351e-60	-0.260079	0.0172984	4.34383e-51
cg26894354	1	203311314	R	FMOD	3'UTR	-0.27487	0.0168292	5.76215e-60	-0.255074	0.0176262	1.83941e-47
cg03545227	2	220173100	F	PTPRN	Body	0.255871	0.0156665	5.81101e-60	0.230196	0.0156304	4.29559e-49
cg20192747	18	44774846	F			0.220637	0.0135138	6.36294e-60	0.195506	0.0136333	1.22484e-46
cg13221458	6	160112632	R	SOD2	Body	-0.298641	0.0182956	6.7645e-60	-0.294182	0.0184298	2.34022e-57
cg05923226	19	15121516	F	CCDC105	TSS200	0.296159	0.0181493	7.35624e-60	0.267735	0.0185071	1.96898e-47
cg16810343	7	75898970	F	SRRM3	Body	-0.285814	0.0175298	9.17919e-60	-0.266161	0.0176446	2.0471e-51
cg02383785	7	127808848	F			0.259571	0.0159538	1.60787e-59	0.203327	0.0162312	5.31721e-36
cg20816447	4	15480781	R	CC2D2A	Body	-0.304581	0.0187221	1.65238e-59	-0.317459	0.0190342	1.8827e-62
cg08316825	5	151304547	F	GLRA1	TSS200	0.24219	0.014898	2.00815e-59	0.235495	0.0153628	4.90122e-53
cg22730004	1	158656718	R	SPTA1	TSS1500	-0.293446	0.0180582	2.23277e-59	-0.247652	0.0188795	2.61263e-39
cg23746497	6	105388668	F			0.234662	0.014461	3.23793e-59	0.227729	0.0141229	1.70956e-58
cg18023598	1	19992504	R	HTR6	1stExon	0.243876	0.0150371	3.7435e-59	0.20623	0.0156056	7.1739e-40
cg18826637	2	145116633	F			-0.284992	0.0175789	4.1331e-59	-0.259993	0.0179842	2.27306e-47
cg17457912	17	1617102	R	C17orf91	Body	-0.178591	0.0110199	4.55328e-59	-0.173503	0.011816	8.20024e-49
cg04604946	12	7023352	F	LRRC23	3'UTR	-0.28918	0.0178508	5.05586e-59	-0.310081	0.0183732	6.66285e-64
cg12457773	6	24126497	F	NRSN1	5'UTR	0.214178	0.0132212	5.08069e-59	0.166448	0.0134294	2.80521e-35
cg23413924	15	45427734	R	DUOX1	Body	0.243574	0.015037	5.17695e-59	0.224441	0.0151666	1.5015e-49
cg02699218	5	132150128	R	ANKRD43	1stExon	0.261538	0.0161465	5.22784e-59	0.220527	0.0168463	3.72996e-39
cg06400319	1	153045274	R	SPRR2B	TSS1500	-0.282664	0.0174566	5.70898e-59	-0.250661	0.0180791	1.03701e-43
cg15704699	17	26439377	F	NLK	Body	-0.278936	0.017243	7.36166e-59	-0.241738	0.0176065	6.70998e-43
cg05346491	19	48917104	F	GRIN2D	Body	-0.288555	0.0178492	8.71745e-59	-0.272776	0.0178679	1.28367e-52
cg17783401	8	54790518	R	RGS20	Body	0.237779	0.0147124	9.38505e-59	0.221215	0.0145284	2.36517e-52
cg20219381	8	101118083	R	RGS22	Body	0.214405	0.0132713	1.03884e-58	0.2128	0.0134614	2.73274e-56
cg26290632	8	91094847	F	CALB1	1stExon	0.270842	0.0167949	1.66413e-58	0.278079	0.0170174	5.05231e-60
cg27050153	14	102030110	F			0.222104	0.0137753	1.74809e-58	0.176087	0.0141466	1.44678e-35
cg10659886	19	58629719	R	ZSCAN18	Body	0.236234	0.0146569	1.91882e-58	0.168043	0.0150795	7.6801e-29
cg18993949	4	15481269	F	CC2D2A	Body	-0.242485	0.0150449	1.92419e-58	-0.21567	0.0154801	4.04316e-44
cg18961681	7	32467657	R			0.238296	0.0147923	2.18994e-58	0.220557	0.0148236	4.52433e-50
cg00764612	1	150255213	F	C1orf51	TSS200	0.189119	0.0117442	2.42495e-58	0.168164	0.0124995	2.93108e-41
cg12892303	17	42733592	R	C17orf104	TSS200	0.290976	0.0180807	2.84655e-58	0.258152	0.0182201	1.4345e-45
cg07806886	3	120626899	R	STXBP5L	TSS200	0.258595	0.0160857	3.75418e-58	0.220963	0.016597	1.93293e-40
cg07211259	9	5510497	R	PDCD1LG2	TSS200	-0.283979	0.0176699	4.05005e-58	-0.291053	0.0183919	2.08954e-56
cg18064714	7	20824556	R	SP8	Body	0.280205	0.0174363	4.1259e-58	0.219794	0.0178498	7.66374e-35
cg26969888	19	14064254	R	PODNL1	TSS200	-0.272755	0.0169864	5.08422e-58	-0.283233	0.0177715	3.48177e-57
cg18797590	4	15480643	R	CC2D2A	Body	-0.289761	0.0180556	5.87323e-58	-0.311433	0.0174962	7.06444e-71
cg02623400	1	50513749	F	ELAVL4	1stExon	0.219291	0.0136654	5.9794e-58	0.17008	0.0138818	1.63886e-34
cg27589809	3	50650410	R	CISH	TSS1500	-0.272869	0.0170166	7.22806e-58	-0.210279	0.0175562	4.66213e-33
cg00439658	17	72848669	F	GRIN2C	Body	0.268022	0.0167291	9.07431e-58	0.244964	0.0172954	1.539e-45
cg18279094	1	63790044	F	FOXD3	1stExon	0.244337	0.0152534	9.48597e-58	0.182899	0.0153677	1.16168e-32
cg01763090	15	31775406	F	OTUD7A	3'UTR	0.290652	0.0181465	9.72476e-58	0.294247	0.0188269	4.61717e-55
cg10424974	16	66388348	F			-0.225392	0.0140757	1.03838e-57	-0.196574	0.0139986	8.57308e-45
cg02838877	13	97873877	R	MBNL2	TSS1500	-0.285882	0.0178724	1.36865e-57	-0.27056	0.0178817	1.01763e-51
cg06966811	14	57276789	R	OTX2	5'UTR	0.224472	0.0140377	1.48298e-57	0.188474	0.0136513	2.3373e-43
cg04329478	19	40169839	F	LOC400696	TSS200	-0.241349	0.015095	1.53242e-57	-0.226003	0.0152523	1.12699e-49
cg09099868	10	22622793	R			0.251676	0.0157491	1.75214e-57	0.225596	0.0162292	6.27435e-44
cg04753583	21	47062565	F			0.252638	0.0158133	1.8695e-57	0.196827	0.0160286	1.16337e-34
cg18418479	17	4735500	F	MINK1	TSS1500	-0.250559	0.0156855	1.94176e-57	-0.240314	0.0155331	5.4342e-54
cg03200166	11	61335254	F	SYT7	Body	0.238771	0.0149595	2.38035e-57	0.17413	0.0156701	1.09408e-28
cg18473521	12	54448265	F	HOXC4	Body	0.288478	0.0180783	2.54257e-57	0.264188	0.0190026	6.09669e-44
cg09295081	2	11810183	R	NTSR2	1stExon	0.254992	0.0160008	3.5534e-57	0.203691	0.0166927	3.01741e-34
cg01243823	16	50732212	R	NOD2	Body	-0.268845	0.0168731	3.71905e-57	-0.301505	0.0168087	6.00838e-72
cg13702996	12	176189	F	IQSEC3	1stExon	0.235363	0.014796	5.65146e-57	0.193406	0.015062	9.70868e-38
cg01106338	18	44790514	F			0.213244	0.013406	5.70091e-57	0.162776	0.0137565	2.64744e-32
cg22586221	15	78984179	F			-0.266331	0.0167438	5.73792e-57	-0.264617	0.0170542	2.69386e-54
cg25838150	11	77259596	R			-0.281362	0.0177117	7.963e-57	-0.278843	0.018832	1.32322e-49
cg19056004	12	7023262	R	LRRC23	3'UTR	-0.281514	0.0177327	9.38832e-57	-0.271661	0.0182073	2.42616e-50
cg02318784	15	27213174	F			0.212681	0.0134004	1.00227e-56	0.190337	0.01305	3.48936e-48
cg08658787	12	113916646	F			0.180806	0.0114033	1.28635e-56	0.180661	0.0115538	4.10908e-55
cg01003961	7	20824706	F	SP8	Body	0.245111	0.0154625	1.36331e-56	0.173387	0.0157572	3.67015e-28
cg18633600	12	1940452	F	LRTM2	Body	0.249219	0.0157383	1.77989e-56	0.216514	0.0158268	1.33317e-42
cg23016129	10	22634224	R	SPAG6	TSS200	0.231344	0.0146153	1.96501e-56	0.181975	0.0150151	8.33256e-34
cg12052661	9	140772545	F	CACNA1B	1stExon	0.231083	0.0146001	2.01134e-56	0.231504	0.0146478	2.88983e-56
cg06602847	9	122131497	R	DBC1	5'UTR	0.218572	0.0138134	2.15349e-56	0.182525	0.0142348	1.22759e-37
cg18471993	6	100917416	F			0.204823	0.0129479	2.3002e-56	0.151568	0.0132541	2.77832e-30
cg00390775	9	79521282	F	PRUNE2	TSS1500	0.215559	0.0136304	2.46919e-56	0.173095	0.0137882	3.78577e-36
cg00145253	1	75602857	F	LHX8	Body	0.239606	0.0151582	2.78505e-56	0.218617	0.0162427	2.71193e-41
cg26354128	14	93897195	F	KIAA1409	5'UTR	0.21433	0.0135629	2.98123e-56	0.192467	0.0137829	2.58081e-44
cg06707978	19	58095155	F	ZIK1	TSS1500	0.234468	0.0148517	3.80662e-56	0.238557	0.0150114	7.23704e-57
cg02318971	11	64739714	R			0.25853	0.016379	3.99358e-56	0.234641	0.0170694	5.3619e-43
cg10967350	3	2141304	F	CNTN4	TSS1500	0.203795	0.0129201	4.73877e-56	0.180556	0.0130724	2.15778e-43
cg03735592	6	138821354	R	NHSL1	TSS1500	-0.259358	0.0164546	5.67922e-56	-0.237152	0.0167414	1.49652e-45
cg06492796	12	96883057	F			-0.289933	0.018398	5.96379e-56	-0.30585	0.017948	4.08471e-65
cg07639287	22	17850911	F			0.225233	0.0142943	6.16731e-56	0.23135	0.014635	2.73778e-56
cg21493505	19	56879418	R	ZNF542	TSS1500	0.265577	0.0168601	6.67674e-56	0.221828	0.0171917	4.3143e-38
cg16705627	13	112721950	F	SOX1	1stExon	0.229234	0.0145615	7.74327e-56	0.215038	0.0145386	1.6785e-49
cg07927379	7	156433108	F	C7orf13	Body	0.29004	0.018431	8.4941e-56	0.306887	0.0191759	1.20177e-57
cg00448560	16	49525727	R	ZNF423	Body	-0.266122	0.0169203	9.73521e-56	-0.247856	0.0174136	5.67895e-46
cg08023265	1	31158138	R			0.225624	0.0143472	1.00377e-55	0.192116	0.0143864	1.12234e-40
cg17283453	19	9473880	F	ZNF177	5'UTR	0.224234	0.0142663	1.14425e-55	0.178843	0.0148512	2.12748e-33
cg03746976	16	58035805	R	C16orf57	Body	-0.257201	0.016381	1.48414e-55	-0.229988	0.0170402	1.63374e-41
cg17953764	4	48492845	F	ZAR1	1stExon	0.240645	0.0153288	1.53785e-55	0.221195	0.0158292	2.25108e-44
cg12764034	1	75602846	F	LHX8	Body	0.235352	0.0150077	2.00449e-55	0.186129	0.0157697	3.7686e-32
cg02395812	14	105955879	F	C14orf80	TSS1500	-0.277307	0.0176836	2.02157e-55	-0.245846	0.0178092	2.39663e-43
cg08566455	2	130971164	F			0.226408	0.0144392	2.07169e-55	0.185246	0.0146284	9.42091e-37
cg20822990	1	17338766	R	ATP13A2	TSS1500	-0.268425	0.0171249	2.25924e-55	-0.257776	0.0177786	1.22546e-47
cg10628205	1	61547131	F	NFIA	Body	-0.249724	0.0159399	2.55844e-55	-0.224341	0.0164896	3.73841e-42
cg00384539	8	70983567	R	PRDM14	TSS200	0.253229	0.0161666	2.67647e-55	0.203512	0.0167346	5.007e-34
cg16086620	14	93389557	R	CHGA	5'UTR	0.237673	0.0151871	3.33755e-55	0.208281	0.0154804	2.89765e-41
cg00174428	1	165204791	R	LMX1A	Body	0.209817	0.0134089	3.45015e-55	0.150511	0.013463	5.13308e-29
cg09401099	3	156534380	F			0.273802	0.0174987	3.48059e-55	0.253723	0.0182152	4.2114e-44
cg16431787	6	1082220	R	LOC285768	Body	-0.288293	0.018426	3.53903e-55	-0.298596	0.0190541	2.39102e-55
cg14359680	14	105532208	R	GPR132	TSS1500	-0.278412	0.0177973	3.6813e-55	-0.259853	0.0183217	1.17081e-45
cg12711760	11	20132923	F	NAV2	Body	-0.264266	0.0169048	4.36809e-55	-0.28497	0.0174423	5.30986e-60
cg18335796	8	91094472	F	CALB1	Body	0.246848	0.0157944	4.6332e-55	0.214507	0.0157827	4.5096e-42
cg26844246	5	170736277	R	TLX3	TSS200	0.228263	0.0146067	4.74824e-55	0.187958	0.0145972	6.12306e-38
cg01281911	1	47882686	R	FOXE3	1stExon	0.272212	0.0174215	4.9092e-55	0.222934	0.017374	1.09239e-37
cg01867395	11	31839628	R	PAX6	TSS200	0.237154	0.015179	5.01116e-55	0.200877	0.0156264	8.06432e-38
cg05863502	9	140771990	R	CACNA1B	TSS1500	0.248367	0.0159092	6.07409e-55	0.203086	0.0161203	2.16255e-36
cg11176990	2	39187533	F	LOC375196	TSS200	0.269559	0.0172907	8.53406e-55	0.213225	0.0183207	2.62497e-31
cg13347071	2	210636748	F	UNC80	1stExon	0.212404	0.0136305	9.49921e-55	0.156201	0.0138063	1.12202e-29
cg02792538	22	38477085	R	SLC16A8	Body	0.238674	0.0153179	9.73806e-55	0.178342	0.0160315	9.53669e-29
cg07149609	1	170630734	R			0.230848	0.0148173	1.00051e-54	0.205299	0.0147757	6.85746e-44
cg26885220	1	65775570	F	DNAJC6	Body	0.230105	0.014778	1.15028e-54	0.194603	0.0149806	1.38892e-38
cg07365960	17	72848535	F	GRIN2C	Body	0.266289	0.0171032	1.17198e-54	0.246114	0.0176506	3.43619e-44
cg22747507	4	175635801	R	GLRA3	Body	-0.281434	0.0180817	1.26755e-54	-0.286734	0.0179173	1.21288e-57
cg22950493	7	32805364	R			-0.232636	0.0149547	1.44806e-54	-0.250361	0.014748	1.2383e-64
cg07101980	11	77780019	R	NDUFC2	3'UTR	-0.258659	0.0166276	1.44862e-54	-0.243407	0.0177419	7.78116e-43
cg06240854	2	99771011	R	LIPT1	TSS1500	-0.281603	0.0181105	1.61254e-54	-0.32448	0.0180358	2.29562e-72
cg26161329	17	56832991	F	PPM1E	TSS1500	0.217964	0.0140191	1.65089e-54	0.187075	0.0150114	1.20043e-35
cg14377791	19	40169912	F	LOC400696	TSS200	-0.235319	0.0151416	1.82452e-54	-0.208867	0.0151704	3.96391e-43
cg15125438	12	113684389	F	TPCN1	Body	-0.233546	0.0150392	2.20028e-54	-0.236404	0.0154996	1.58912e-52
cg07006564	15	62360790	R	C2CD4A	Body	0.227814	0.0146794	2.5714e-54	0.184635	0.0150416	1.23522e-34
cg04521004	3	157821262	R	SHOX2	Body	0.231535	0.0149282	2.97107e-54	0.180297	0.0152456	2.85918e-32
cg06268694	22	46932642	R	CELSR1	1stExon	0.243341	0.0156907	3.03282e-54	0.16667	0.0164532	4.06885e-24
cg24035245	1	119535928	F			0.21772	0.0140409	3.15358e-54	0.190157	0.0141577	3.96146e-41
cg02983424	15	97491433	F			0.247679	0.0159743	3.21574e-54	0.224667	0.0166902	2.65424e-41
cg21159778	9	117266918	R	DFNB31	TSS1500	0.284609	0.0183694	3.83119e-54	0.30066	0.0190342	3.32701e-56
cg15562220	6	25652395	R	SCGN	TSS200	0.219853	0.0141936	4.08431e-54	0.178499	0.0139919	2.83878e-37
cg19332452	19	12936719	F	RTBDN	Body	0.214536	0.0138511	4.13422e-54	0.149463	0.0172622	4.78529e-18
cg10835286	2	66657913	R			-0.289778	0.0187233	4.9665e-54	-0.280023	0.0187554	2.09595e-50
cg16219603	8	57360586	R	PENK	TSS1500	0.236473	0.01528	5.03931e-54	0.216387	0.015816	1.31024e-42
cg15728256	1	40254184	R	BMP8B	5'UTR	0.258418	0.0167001	5.19449e-54	0.235752	0.0176612	1.20794e-40
cg03725309	1	109757585	F	SARS	Body	-0.218982	0.0141536	5.3777e-54	-0.235602	0.0151625	1.90395e-54
cg27232482	1	159174001	R	DARC	TSS1500	-0.257415	0.0166399	5.54983e-54	-0.214861	0.0168894	4.4808e-37
cg07489048	14	29236898	R	FOXG1	1stExon	0.220159	0.0142322	5.61315e-54	0.177198	0.0149488	2.06022e-32
cg10608615	5	169780747	F	KCNIP1	TSS200	-0.233673	0.015106	5.62088e-54	-0.217769	0.0155946	2.57035e-44
cg11826475	12	120704006	R	PXN	TSS1500	-0.268244	0.0173425	5.75533e-54	-0.264821	0.0180833	1.46046e-48
cg07057579	15	95870112	R			0.212976	0.0137731	6.15329e-54	0.186356	0.0142005	2.42333e-39
cg14314729	5	179815975	R			-0.265481	0.017172	6.45235e-54	-0.280862	0.0183229	4.9392e-53
cg05156137	21	35898975	R	RCAN1	5'UTR	-0.284585	0.0184252	8.10381e-54	-0.316572	0.0188557	2.92876e-63
cg05768427	3	127634188	R			0.221314	0.0143347	8.95055e-54	0.169394	0.0149262	7.52411e-30
cg19702785	20	43727089	R	KCNS1	Body	0.273411	0.0177123	9.34375e-54	0.227581	0.018443	5.53482e-35
cg07416237	13	100548078	F	CLYBL	3'UTR	0.242415	0.0157095	1.01149e-53	0.204255	0.0156304	5.03037e-39
cg25998745	8	142028625	F			-0.25066	0.0162501	1.10812e-53	-0.210047	0.0165664	7.71896e-37
cg01294808	5	3599686	R	IRX1	Body	0.204964	0.0132913	1.18363e-53	0.167027	0.0134235	1.52895e-35
cg18299578	14	29235928	F	FOXG1	TSS1500	0.237327	0.0153922	1.22579e-53	0.180398	0.016061	2.83802e-29
cg00884093	22	46932648	R	CELSR1	1stExon	0.236665	0.0153528	1.29637e-53	0.168563	0.0158515	2.07383e-26
cg02374745	17	6679564	R	FBXO39	1stExon	0.226047	0.0146654	1.32568e-53	0.192342	0.0148107	1.45622e-38
cg01486610	8	42749175	F	RNF170	5'UTR	-0.290547	0.0188555	1.42086e-53	-0.306688	0.0189926	1.17789e-58
cg27401724	17	43213629	R	ACBD4	Body	-0.293342	0.0190418	1.51046e-53	-0.305531	0.0195303	3.65464e-55
cg01719405	14	62401258	F			-0.261577	0.016987	1.67131e-53	-0.264413	0.0172569	5.43962e-53
cg02872426	6	110736772	F	DDO	TSS200	-0.285843	0.0185635	1.68542e-53	-0.291294	0.0188458	6.79659e-54
cg16376108	16	54967024	F	IRX5	Body	0.217811	0.0141562	2.02342e-53	0.178943	0.0142969	6.08567e-36
cg22694818	1	75595970	F	LHX8	5'UTR	0.190919	0.0124102	2.09313e-53	0.176868	0.0128162	2.53554e-43
cg07797372	1	64602654	R	ROR1	Body	-0.286163	0.0186019	2.11127e-53	-0.27522	0.018374	1.011e-50
cg16544169	8	23564717	F	NKX2-6	TSS1500	0.183386	0.0119242	2.2532e-53	0.138642	0.0114563	1.03249e-33
cg03771840	6	30140145	R	TRIM15	3'UTR	0.242659	0.0157872	2.57523e-53	0.203134	0.0163588	2.10289e-35
cg17186168	2	11810403	F	NTSR2	TSS200	0.228973	0.0148994	2.68565e-53	0.212157	0.0151193	9.89959e-45
cg15466862	13	112722333	F	SOX1	1stExon	0.224714	0.0146292	3.0057e-53	0.184593	0.0150486	1.37131e-34
cg20595453	6	33219392	R	VPS52	Body	-0.26642	0.0173532	3.39479e-53	-0.263187	0.0172317	1.14919e-52
cg12206199	2	39187543	F	LOC375196	TSS200	0.283063	0.0184416	3.58586e-53	0.245637	0.0192518	2.7719e-37
cg00876267	9	139588516	F			-0.271192	0.0176714	3.74432e-53	-0.260538	0.0183375	8.17482e-46
cg23534245	20	6751435	F	BMP2	Body	-0.246296	0.0160523	3.92212e-53	-0.241017	0.016337	2.94885e-49
cg12939283	6	33044012	R	HLA-DPB1	Body	-0.28517	0.0185957	4.44566e-53	-0.291562	0.0188211	3.9771e-54
cg15789607	19	4769690	F	MIR7-3	TSS1500	0.207141	0.0135092	4.57578e-53	0.177235	0.013777	7.12934e-38
cg18236477	13	26043066	F	ATP8A2	Body	0.261056	0.0170291	4.81999e-53	0.215206	0.0174639	6.81928e-35
cg00329615	3	118706648	R	IGSF11	Body	-0.233884	0.0152597	5.05192e-53	-0.221107	0.0158656	3.8136e-44
cg15448975	4	5894930	R	CRMP1	TSS200	0.255679	0.0167014	6.67325e-53	0.228635	0.0168308	4.95696e-42
cg05452406	6	10881891	F	GCM2	Body	0.22828	0.0149185	7.43369e-53	0.183742	0.0152287	1.6058e-33
cg07892413	2	129076032	F	HS6ST1	1stExon	0.231818	0.015157	8.33193e-53	0.20203	0.0152793	6.513e-40
cg02286081	6	33043841	R	HLA-DPB1	1stExon	-0.278071	0.0181965	1.01538e-52	-0.301973	0.018627	4.17643e-59
cg16498194	12	130647874	R	FZD10	1stExon	0.233558	0.0152882	1.08735e-52	0.206052	0.0158118	8.08948e-39
cg26325867	6	41398693	F			-0.242082	0.0158512	1.17236e-52	-0.233313	0.0163731	4.49747e-46
cg09578475	19	9473688	F	ZNF177	TSS200	0.224197	0.0146838	1.24235e-52	0.215736	0.0150978	2.55347e-46
cg20723355	17	6679597	R	FBXO39	5'UTR	0.228796	0.0149885	1.31245e-52	0.189332	0.0151137	5.29993e-36
cg11413039	11	125774447	R	PUS3	TSS1500	0.220167	0.014424	1.32909e-52	0.205415	0.0141145	5.54667e-48
cg26890189	19	47951302	R	SLC8A2	Body	0.250095	0.0163882	1.3983e-52	0.239141	0.0170113	6.90694e-45
cg19821713	15	96909816	R			0.203479	0.0133388	1.53068e-52	0.180554	0.0136539	6.41356e-40
cg11563680	6	100917397	F			0.214062	0.0140357	1.61405e-52	0.175652	0.0146063	2.60042e-33
cg24436906	2	242498081	F	BOK	TSS200	0.226128	0.0148299	1.69434e-52	0.197763	0.0152472	1.79975e-38
cg04999352	11	63304614	R	RARRES3	Body	-0.262879	0.0172574	2.14272e-52	-0.295524	0.0180501	3.01164e-60
cg26923490	19	49575475	R	KCNA7	1stExon	0.241029	0.0158242	2.18045e-52	0.195612	0.0162249	1.79592e-33
cg08258922	14	103745602	R			0.209609	0.0137618	2.19476e-52	0.153235	0.013911	3.22308e-28
cg12451153	22	37099549	F	CACNG2	TSS1500	0.2468	0.016206	2.27335e-52	0.24942	0.0162496	3.57962e-53
cg06488443	2	162280341	F	TBR1	Body	0.257368	0.0169016	2.3262e-52	0.20259	0.0172827	9.81984e-32
cg04360793	1	79472361	R	ELTD1	5'UTR	0.21225	0.0139453	2.59783e-52	0.199669	0.0140255	5.46579e-46
cg20188739	8	67834756	R	SNORD87	Body	-0.21181	0.0139311	3.31887e-52	-0.197239	0.0139079	1.18815e-45
cg17593342	6	14037614	R			-0.272645	0.0179337	3.38113e-52	-0.246124	0.017405	2.12293e-45
cg06911110	1	17293971	R	CROCC	Body	-0.209265	0.013767	3.5106e-52	-0.195199	0.0136462	2.06013e-46
cg04890576	17	73032613	F			-0.289597	0.0190566	3.72188e-52	-0.248927	0.0194119	1.21239e-37
cg24909548	19	36736272	R			0.230359	0.0151671	4.24114e-52	0.216709	0.0158269	1.12622e-42
cg02085953	2	97202260	F	ARID5A	TSS1500	-0.261301	0.0172067	4.37842e-52	-0.258166	0.0164408	1.44796e-55
cg15852312	14	103673875	R			0.199498	0.0131407	4.67278e-52	0.154667	0.013475	1.6999e-30
cg24880056	18	31158234	R	ASXL3	TSS1500	0.213932	0.0140987	5.26551e-52	0.160592	0.0144627	1.20077e-28
cg01464052	1	150255137	F	C1orf51	TSS200	0.20493	0.0135083	5.52834e-52	0.171351	0.0141609	1.05221e-33
cg07552803	8	24771326	R	NEFM	TSS1500	0.239253	0.015776	5.97886e-52	0.156474	0.0164025	1.43299e-21
cg08044097	8	55371013	R	SOX17	Body	0.238971	0.0157588	6.09377e-52	0.192348	0.0162758	3.14885e-32
cg16288089	7	97361408	R	TAC1	5'UTR	0.225017	0.0148418	6.40471e-52	0.197331	0.0154757	3.07587e-37
cg05937737	3	170303540	F	SLC7A14	5'UTR	0.19273	0.0127202	7.39992e-52	0.162041	0.0125197	2.57672e-38
cg23995914	4	10459228	F	ZNF518B	TSS200	0.269401	0.0177824	7.58858e-52	0.26904	0.0180785	4.32591e-50
cg13791254	9	100616607	R	FOXE1	1stExon	0.267503	0.0176655	8.47574e-52	0.201601	0.0175921	2.10187e-30
cg02519751	3	147126753	R	ZIC1	TSS1500	0.2413	0.0159374	8.75723e-52	0.191189	0.0165358	6.41183e-31
cg24938830	2	210636539	R	UNC80	TSS200	0.211479	0.0139778	1.03308e-51	0.167413	0.0141181	1.95511e-32
cg08310088	16	28081556	R			-0.276883	0.0183058	1.10119e-51	-0.204359	0.0194245	6.93891e-26
cg10827488	11	113953838	F	ZBTB16	Body	0.197837	0.0130852	1.21029e-51	0.168348	0.013964	1.80649e-33
cg12554573	3	51976667	R	PARP3	5'UTR	-0.272185	0.0180055	1.25634e-51	-0.272194	0.0180464	2.09475e-51
cg10239388	7	70596308	R	WBSCR17	TSS1500	0.200293	0.013251	1.28246e-51	0.153542	0.0134574	3.75009e-30
cg11377136	22	46658960	R	PKDREJ	1stExon	0.238966	0.0158097	1.28637e-51	0.193257	0.0164983	1.08365e-31
cg24366557	6	50787650	F	TFAP2B	Body	0.199782	0.0132179	1.29977e-51	0.16369	0.0134255	3.41202e-34
cg09793172	1	21044101	F	KIF17	1stExon	0.208304	0.0137834	1.33541e-51	0.158351	0.0140746	2.29527e-29
cg16541931	10	25463757	R	LOC100128811	Body	0.245487	0.0162445	1.34995e-51	0.189066	0.0166372	6.31434e-30
cg04950301	6	12750392	F	PHACTR1	Body	0.196562	0.0130108	1.44329e-51	0.155636	0.0132564	7.90656e-32
cg10177394	6	10385126	F			0.203198	0.0134541	1.54561e-51	0.181286	0.0133611	6.18277e-42
cg25334393	8	145955671	R	ZNF251	Body	0.265212	0.0175603	1.54781e-51	0.257038	0.0174695	5.28119e-49
cg19464804	15	96884509	F			0.222387	0.01473	1.68007e-51	0.173864	0.0149524	2.97634e-31
cg12089570	19	9473715	F	ZNF177	1stExon	0.21769	0.0144206	1.72791e-51	0.209206	0.0149995	3.25782e-44
cg09473315	17	76228233	R	LOC283999	Body	0.246549	0.0163369	1.83976e-51	0.196414	0.0166406	3.75401e-32
cg19453093	14	88655985	F	KCNK10	Body	-0.274947	0.0182201	1.87392e-51	-0.249964	0.018616	4.17959e-41
cg11284797	11	18067816	R			0.255454	0.0169343	2.03283e-51	0.208745	0.0177025	4.30024e-32
cg22851420	1	40149650	F	HPCAL4	Body	0.253582	0.0168122	2.08853e-51	0.214054	0.0174943	2.00536e-34
cg00034076	8	85096037	F	RALYL	5'UTR	0.207871	0.013784	2.17124e-51	0.187592	0.0145845	7.32009e-38
cg17436656	12	53627106	F	RARG	TSS1500	-0.281691	0.0186867	2.38569e-51	-0.271003	0.0182152	4.58657e-50
cg25694915	2	169658981	R	NOSTRIN	5'UTR	-0.268433	0.0178082	2.41803e-51	-0.240192	0.0186747	7.3709e-38
cg22156456	17	39844239	R	EIF1	TSS1500	-0.276522	0.0183452	2.42867e-51	-0.270943	0.0190163	4.61701e-46
cg14472366	13	20875915	F			0.221701	0.0147103	2.50669e-51	0.185048	0.0153968	2.83645e-33
cg07568841	7	30362781	F	ZNRF2	Body	-0.210928	0.0140007	2.72742e-51	-0.253753	0.013513	1.13373e-78
cg00048759	7	99775422	F	STAG3	TSS200	0.251226	0.0166794	2.87789e-51	0.237334	0.0173589	1.48811e-42
cg01287975	7	97361241	R	TAC1	TSS200	0.239093	0.0158852	3.3819e-51	0.250083	0.0164096	1.91817e-52
cg03259243	17	21356007	F			0.208331	0.0138422	3.42927e-51	0.258555	0.0146679	1.5223e-69
cg21183256	8	73163868	R			0.20699	0.0137566	3.63616e-51	0.177355	0.0143171	3.04982e-35
cg18448426	22	36648832	R	APOL1	TSS1500	-0.255317	0.0169726	3.84426e-51	-0.240844	0.0172098	1.68248e-44
cg14823851	17	59532306	R	TBX4	TSS1500	0.213419	0.0141888	3.93395e-51	0.155293	0.015009	4.33049e-25
cg19729744	3	194752020	F			-0.258077	0.0171583	3.95738e-51	-0.230797	0.017285	1.14602e-40
cg04415599	19	37464508	F			0.216495	0.0143969	4.16293e-51	0.16886	0.0148689	6.87495e-30
cg25478614	3	187387866	R	SST	Body	0.283141	0.0188291	4.17493e-51	0.327961	0.0194109	4.83715e-64
cg09515953	19	38747355	R	PPP1R14A	TSS200	0.210642	0.0140151	4.69111e-51	0.175126	0.0145286	1.84943e-33
cg02662277	10	60936383	F	PHYHIPL	5'UTR	0.206217	0.0137271	5.227e-51	0.166596	0.0141731	6.70566e-32
cg14039301	11	296540	F			-0.272475	0.0181463	5.81545e-51	-0.26135	0.0187256	2.85922e-44
cg18311537	7	27209195	R	MIR196B	TSS200	0.207468	0.0138234	6.46319e-51	0.141829	0.0141479	1.18699e-23
cg08541518	6	69942892	F	BAI3	Body	0.249648	0.0166383	6.86882e-51	0.217309	0.0174206	1.03177e-35
cg01797043	16	2004686	F	RPL3L	TSS200	-0.267657	0.0178401	7.00009e-51	-0.235197	0.0185812	1.01285e-36
cg07271264	11	17740977	F	MYOD1	TSS200	0.214805	0.0143276	8.2409e-51	0.176207	0.0141592	1.49424e-35
cg00875989	18	44774054	R			0.228233	0.0152288	8.93626e-51	0.199561	0.0154348	3.07554e-38
cg12638731	13	36045281	R	NBEA	Body	0.204171	0.0136291	9.84443e-51	0.178934	0.0132139	8.91656e-42
cg22320365	17	36718198	F	SRCIN1	Body	0.245217	0.0163708	1.00799e-50	0.165566	0.0168504	8.73204e-23
cg24935332	11	31846819	R			0.209744	0.0140035	1.02336e-50	0.200782	0.0141742	1.50233e-45
cg02513379	16	27414281	R	IL21R	TSS200	-0.241881	0.0161494	1.02631e-50	-0.252454	0.0162718	2.75256e-54
cg18150280	1	192776859	R	RGS2	TSS1500	-0.267496	0.0178623	1.06264e-50	-0.271078	0.0173817	7.80262e-55
cg09059319	8	99986175	F			0.229959	0.0153564	1.07336e-50	0.166138	0.0157133	3.97146e-26
cg08288811	5	140180926	R	PCDHA2	Body	0.18735	0.0125148	1.14864e-50	0.164562	0.0124822	1.08792e-39
cg13640414	19	15530870	F	AKAP8L	TSS1500	-0.279082	0.018645	1.18475e-50	-0.311782	0.0189575	8.90014e-61
cg08234504	5	139013317	F			-0.261268	0.0174653	1.35526e-50	-0.302952	0.0169006	7.44701e-72
cg21801378	15	72612125	R	BRUNOL6	1stExon	0.257509	0.017216	1.39021e-50	0.222005	0.017605	1.85219e-36
cg00481951	3	187387650	R	SST	Body	0.273996	0.0183355	1.71704e-50	0.260302	0.0183918	1.78707e-45
cg17977409	9	17579227	F	SH3GL2	1stExon	0.229921	0.0153906	1.83668e-50	0.197918	0.0157493	3.21568e-36
cg07883457	6	58147897	R			0.213325	0.0142816	1.89118e-50	0.147143	0.0147436	1.86326e-23
cg15027907	19	48076699	F			0.254755	0.0170703	2.30486e-50	0.20367	0.0175511	3.91452e-31
cg12325536	5	87968658	R	LOC645323	Body	0.207632	0.0139169	2.46518e-50	0.175666	0.0140072	4.44604e-36
cg12348202	7	158381023	R	PTPRN2	TSS1500	0.22292	0.0149451	2.59502e-50	0.168821	0.0156417	3.7146e-27
cg20661138	8	145925314	F			0.223929	0.0150173	2.77672e-50	0.200245	0.0149587	7.24335e-41
cg15121420	2	238490819	R	RAB17	Body	-0.277669	0.0186308	3.11606e-50	-0.260276	0.0193108	2.0997e-41
cg13488201	10	128077323	F	ADAM12	TSS200	0.204794	0.013746	3.37499e-50	0.15714	0.0137512	3.05203e-30
cg18808904	20	11898851	R	BTBD3	1stExon	-0.258019	0.0173428	4.60689e-50	-0.219665	0.0176603	1.6181e-35
cg09360770	16	86600326	F	FOXC2	TSS1500	0.244924	0.0164769	5.58907e-50	0.198853	0.0160934	4.51059e-35
cg26935102	1	145470946	F	POLR3GL	TSS1500	-0.264126	0.0177744	6.00386e-50	-0.268685	0.0179998	2.19564e-50
cg15894389	13	47470857	R	HTR2A	1stExon	-0.27603	0.0185867	6.86129e-50	-0.299701	0.01865	4.15585e-58
cg06247837	17	37820135	R	TCAP	TSS1500	-0.202906	0.0136629	6.86476e-50	-0.182213	0.0140433	1.69298e-38
cg05700079	3	147126961	R	ZIC1	TSS1500	0.262357	0.0176826	8.45017e-50	0.230907	0.0179324	6.10134e-38
cg10743390	19	30020728	R	VSTM2B	Body	0.230659	0.0155482	8.6923e-50	0.197862	0.0159884	3.55232e-35
cg26856607	19	19325920	F	NCAN	5'UTR	0.212388	0.0143381	1.21058e-49	0.189646	0.0143902	1.16191e-39
cg14020846	14	103674272	R			0.249142	0.0168263	1.32509e-49	0.226909	0.0167728	1.06316e-41
cg05336395	13	53421688	R	PCDH8	1stExon	0.233671	0.0157843	1.37878e-49	0.189229	0.0160463	4.25516e-32
cg20442599	6	108479500	R			0.22904	0.0154758	1.46764e-49	0.182045	0.0158756	1.93285e-30
cg24139093	15	97491245	F			0.196603	0.0132851	1.49287e-49	0.169207	0.0138173	1.76373e-34
cg04807594	3	148415747	R	AGTR1	1stExon	0.179276	0.0121167	1.55858e-49	0.14868	0.012588	3.41639e-32
cg19021738	19	9517604	F			0.200445	0.0135483	1.581e-49	0.197335	0.0133403	1.63997e-49
cg02093112	17	6679495	R	FBXO39	TSS200	0.211222	0.0142782	1.61846e-49	0.17495	0.014285	1.74067e-34
cg06279276	16	67184164	R	B3GNT9	Body	0.270159	0.0182655	1.68371e-49	0.259312	0.0191868	1.27343e-41
cg21296230	15	33010536	R	GREM1	5'UTR	0.262737	0.0177653	1.71647e-49	0.224328	0.018132	3.70908e-35
cg16933181	18	24765485	F	CHST9	TSS200	0.201564	0.0136313	1.78111e-49	0.180098	0.013933	3.20841e-38
cg11204212	8	95651218	R			0.247904	0.0167657	1.7938e-49	0.225665	0.0174075	1.96503e-38
cg03553587	3	28616941	R			0.171657	0.0116161	2.04485e-49	0.140483	0.0117844	9.18575e-33
cg05142982	8	495736	R	C8orf42	TSS1500	0.222417	0.0150515	2.05927e-49	0.167725	0.0152261	3.21397e-28
cg03752138	17	76357232	F	SOCS3	TSS1500	-0.233459	0.0158076	2.32916e-49	-0.216925	0.0169639	1.92572e-37
cg27343616	20	17207697	R	PCSK2	5'UTR	0.207203	0.0140318	2.40539e-49	0.20222	0.0148352	2.61692e-42
cg14566959	5	140772681	F	PCDHGA4	Body	0.269963	0.0182829	2.43181e-49	0.236774	0.0186824	8.27813e-37
cg06204735	14	74892986	F	TMEM90A	TSS200	0.23522	0.015932	2.5017e-49	0.194116	0.0158111	1.20072e-34
cg15948836	11	36114126	F	LDLRAD3	Body	-0.262093	0.0177545	2.57317e-49	-0.228964	0.0185737	6.45496e-35
cg02352240	16	51188372	F			0.190868	0.0129297	2.57698e-49	0.183305	0.0127246	4.77437e-47
cg06874016	17	40177415	F	NKIRAS2	3'UTR	-0.265541	0.0179928	2.72379e-49	-0.256162	0.018067	1.24684e-45
cg23850283	2	114261369	F			0.222091	0.0150551	2.99115e-49	0.180797	0.0152562	2.13333e-32
cg12508451	15	37172793	F	LOC145845	Body	0.195879	0.0132795	3.05594e-49	0.16281	0.0133264	2.51796e-34
cg18815943	1	47882314	F	FOXE3	1stExon	0.264983	0.0179644	3.05769e-49	0.239119	0.0180912	6.96325e-40
cg15222651	19	9609152	R	ZNF560	5'UTR	0.228789	0.0155182	3.39859e-49	0.174264	0.0160791	2.2765e-27
cg09626984	8	11566096	R	GATA4	Body	0.250871	0.0170202	3.58734e-49	0.24112	0.0174271	1.54742e-43
cg22483030	6	33043849	F	HLA-DPB1	1stExon	-0.265449	0.0180126	3.73569e-49	-0.282101	0.0186334	8.8827e-52
cg18034299	5	172359680	F	ERGIC1	Body	-0.2607	0.0176927	3.84666e-49	-0.260262	0.0176236	2.36164e-49
cg13755776	11	3602845	R			-0.176729	0.011994	3.85615e-49	-0.186919	0.0124081	2.78494e-51
cg04578903	1	21754899	R			0.215883	0.0146547	4.05405e-49	0.19111	0.0148686	8.24632e-38
cg13176012	2	157176971	R			0.192328	0.0130667	4.87131e-49	0.155301	0.0133346	2.39308e-31
cg02315732	11	61732658	F	FTH1	Body	-0.277106	0.0188345	5.3426e-49	-0.223967	0.0187256	5.72485e-33
cg02662828	4	48492848	F	ZAR1	1stExon	0.227052	0.0154539	7.23333e-49	0.206835	0.0163354	9.63316e-37
cg10189695	4	8582300	R	GPR78	1stExon	0.232421	0.0158224	7.5489e-49	0.229604	0.015365	1.72369e-50
cg23469878	9	139640884	F	LCN6	Body	-0.230386	0.0156877	7.95672e-49	-0.207347	0.0160875	5.20939e-38
cg10633658	6	58147525	F			0.204222	0.0139064	7.99164e-49	0.162209	0.0143102	8.77779e-30
cg18405719	3	153242	R			-0.266123	0.0181253	8.35523e-49	-0.313583	0.0183214	1.13411e-65
cg16655791	6	106429610	F			0.250152	0.0170453	9.22955e-49	0.212492	0.017786	6.71818e-33
cg02030542	16	70722454	F	VAC14	Body	-0.18755	0.0127841	9.94452e-49	-0.178201	0.0137129	1.30376e-38
cg19029181	3	147130536	R	ZIC1	Body	0.231371	0.0157736	1.03009e-48	0.182977	0.015868	9.18392e-31
cg09017434	5	16179660	F	2011-03-01	1stExon	0.231051	0.0157526	1.04168e-48	0.172692	0.0159505	2.57119e-27
cg19181162	14	38091824	F			0.194217	0.0132464	1.13104e-48	0.1885	0.0132734	8.9871e-46
cg09676860	2	130737664	R	RAB6C	5'UTR	0.25541	0.0174202	1.1335e-48	0.215973	0.0173649	1.63984e-35
cg13370427	22	40743980	F	ADSL	Body	-0.224894	0.0153389	1.13411e-48	-0.212872	0.0156007	2.16284e-42
cg14405924	10	131758112	F	EBF3	Body	0.187445	0.0127909	1.25908e-48	0.156892	0.0125304	5.73715e-36
cg02281167	6	30140113	R	TRIM15	Body	0.221835	0.01514	1.30199e-48	0.153836	0.0161858	2.0122e-21
cg01302656	14	29254853	F	C14orf23	Body	0.237569	0.0162171	1.36095e-48	0.260015	0.0160241	3.27509e-59
cg06821999	14	95238156	R			0.247478	0.0168963	1.4105e-48	0.176321	0.0171016	6.33699e-25
cg07963234	4	5894923	R	CRMP1	TSS200	0.252251	0.017224	1.4435e-48	0.196506	0.0175139	3.25316e-29
cg08555657	1	153068231	R	SPRR2E	TSS1500	-0.238262	0.0162696	1.45799e-48	-0.223905	0.0168858	3.94903e-40
cg25739875	6	10419684	R	TFAP2A	5'UTR	0.198808	0.0135815	1.60392e-48	0.15848	0.0139862	9.1963e-30
cg13779907	1	38230073	R	EPHA10	Body	0.21465	0.0146693	1.73995e-48	0.166277	0.015218	8.63063e-28
cg17269633	17	42733600	R	C17orf104	TSS200	0.243411	0.0166388	1.83085e-48	0.228319	0.0170561	7.26585e-41
cg21632975	19	46456210	R	NOVA2	Body	0.257291	0.0175915	1.92186e-48	0.252165	0.0183965	9.19265e-43
cg08877357	10	113120532	F			-0.269571	0.0184313	1.92571e-48	-0.27037	0.0189137	2.35322e-46
cg04293085	20	4202378	R	ADRA1D	Body	0.22271	0.0152337	2.1071e-48	0.175209	0.0153791	4.54729e-30
cg04931216	1	50885132	R	DMRTA2	Body	0.235914	0.0161375	2.12697e-48	0.187451	0.0165228	7.85487e-30
cg25413977	2	66651619	F			-0.212768	0.0145584	2.26099e-48	-0.164841	0.0150613	7.05015e-28
cg07464358	7	100952364	R			0.231846	0.0158665	2.34277e-48	0.191627	0.0166333	1.03766e-30
cg25649641	15	76635357	F			0.217571	0.0148912	2.39899e-48	0.17086	0.0151826	2.21995e-29
cg04044664	5	132150117	R	ANKRD43	1stExon	0.238066	0.0162972	2.50655e-48	0.176208	0.0171533	9.37195e-25
cg27526665	3	24537050	R	THRB	TSS1500	0.208686	0.0142934	2.80028e-48	0.171152	0.0148572	1.0483e-30
cg12610471	10	22634199	R	SPAG6	TSS200	0.237254	0.0162517	2.86097e-48	0.189719	0.0164695	1.05336e-30
cg14257429	9	116570319	R			-0.253293	0.0173512	2.89142e-48	-0.249264	0.0175422	8.00669e-46
cg13767625	9	135848623	R			-0.255472	0.0175025	2.96577e-48	-0.220209	0.018299	2.3565e-33
cg05764628	19	41018759	F	SPTBN4	Body	0.215261	0.0147486	3.00582e-48	0.176306	0.015227	5.29525e-31
cg25235397	3	191047240	R	CCDC50	5'UTR	0.246566	0.0168939	3.02076e-48	0.21419	0.0174242	9.92004e-35
cg04955914	2	220040571	R	C2orf24	Body	-0.22166	0.0151876	3.03146e-48	-0.24033	0.0156972	6.51847e-53
cg10192893	4	41747895	R	PHOX2B	Body	0.213954	0.0146627	3.16939e-48	0.20836	0.01473	1.99867e-45
cg27020216	3	153840347	R	SGEF	Body	0.192541	0.0131998	3.41156e-48	0.13756	0.0132043	2.05647e-25
cg11649376	12	81473234	F	ACSS3	Body	-0.262645	0.0180189	3.98412e-48	-0.254131	0.0177975	2.95756e-46
cg25818109	3	186937654	R	MASP1	3'UTR	-0.22981	0.0157684	4.10298e-48	-0.189885	0.0154051	6.55625e-35
cg08622677	12	3601306	R	PRMT8	Body	0.252125	0.0172996	4.10854e-48	0.229309	0.0178933	1.34517e-37
cg13570972	11	31839632	R	PAX6	TSS200	0.228951	0.015714	4.36517e-48	0.168664	0.0153858	5.79939e-28
cg15007156	1	14925135	F	KIAA1026	TSS200	0.225163	0.0154591	4.6851e-48	0.216973	0.0156048	5.96818e-44
cg21488279	5	122434178	F	PRDM6	Body	0.20013	0.0137441	4.95751e-48	0.167984	0.0138855	1.08496e-33
cg00346208	1	20669905	R	VWA5B1	Body	0.229033	0.0157346	5.34766e-48	0.194347	0.0160726	1.16626e-33
cg04976151	16	57496328	R	POLR2C	TSS1500	-0.267197	0.0183569	5.3751e-48	-0.243846	0.0190506	1.64173e-37
cg06619066	18	24765154	F	CHST9	1stExon	0.204193	0.0140305	5.54609e-48	0.172535	0.0141346	2.86687e-34
cg25533247	19	15530630	F	AKAP8L	TSS1500	-0.237175	0.0162971	5.57484e-48	-0.213549	0.0169118	1.4949e-36
cg11201710	3	192232468	F	FGF12	Body	0.213603	0.0146802	5.79859e-48	0.129609	0.0148655	2.81274e-18
cg26304237	1	65730384	R	DNAJC6	TSS200	0.193313	0.0132873	5.95794e-48	0.152573	0.0138053	2.14989e-28
cg18786171	10	75935758	F	ADK	Body	-0.243588	0.0167447	6.08669e-48	-0.221532	0.0169469	4.75367e-39
cg04651240	11	18229519	R	LOC494141	TSS1500	-0.25462	0.0175064	6.33621e-48	-0.283459	0.0179003	1.77343e-56
cg13786089	19	3869086	F	ZFR2	TSS200	0.224499	0.015436	6.38487e-48	0.19418	0.0153209	8.22119e-37
cg11095383	5	140174887	R	PCDHA1	Body	0.194517	0.0133751	6.45464e-48	0.157463	0.0139918	2.21426e-29
cg18987410	11	124791197	R	HEPACAM	Body	0.244528	0.0168152	6.56253e-48	0.213837	0.0170733	5.47256e-36
cg22737154	2	64631614	R			-0.150997	0.0103898	7.46463e-48	-0.107193	0.0105414	2.73327e-24
cg20699549	15	42567973	R	GANC	Body	-0.239584	0.0164885	7.7825e-48	-0.224964	0.0168512	1.18392e-40
cg06819923	16	21214508	R	ZP2	Body	-0.262712	0.018084	8.13254e-48	-0.237581	0.0187559	9.00984e-37
cg17508591	5	140214138	R	PCDHA6	Body	0.198879	0.0136961	8.93961e-48	0.197433	0.0134953	1.81387e-48
cg00573770	2	145278485	F	ZEB2	TSS1500	-0.195953	0.0134948	8.96523e-48	-0.210533	0.0136181	6.47485e-54
cg01908954	15	51973764	F	SCG3	5'UTR	0.195812	0.013491	9.842e-48	0.182784	0.0137079	1.46376e-40
cg19885761	5	175223646	R	CPLX2	5'UTR	0.22968	0.0158249	9.90704e-48	0.177958	0.0156335	5.07535e-30
cg17168836	1	68256161	R	GNG12	5'UTR	-0.262603	0.0181007	1.08037e-47	-0.262688	0.0184639	6.21905e-46
cg13974632	11	27740813	F	BDNF	Body	0.195936	0.0135075	1.11384e-47	0.152995	0.0136316	3.12528e-29
cg23960707	17	56083289	R	SFRS1	Body	-0.245443	0.0169223	1.14033e-47	-0.238089	0.0172622	2.82836e-43
cg11274314	2	242480504	F			0.23749	0.0163835	1.29048e-47	0.173304	0.0173442	1.65164e-23
cg27649239	15	68120393	R	LBXCOR1	Body	0.222317	0.0153371	1.29469e-47	0.149942	0.0156095	7.55597e-22
cg03171770	10	43393728	R			0.223983	0.015455	1.34863e-47	0.181436	0.0158811	3.1486e-30
cg18310639	1	223904225	F	CAPN2	Body	-0.189513	0.0130784	1.39214e-47	-0.183747	0.0137292	7.53349e-41
cg15475851	10	105037349	R	INA	1stExon	0.231706	0.0159903	1.39384e-47	0.185338	0.0161768	2.16764e-30
cg16107285	15	99645031	R	SYNM	TSS1500	0.229026	0.0158067	1.41901e-47	0.213987	0.0154013	6.88673e-44
cg23536681	4	380267	F			0.207566	0.0143292	1.49469e-47	0.161423	0.0137862	1.14603e-31
cg19230755	7	65878503	R			0.206986	0.0142904	1.52286e-47	0.193827	0.0147709	2.45593e-39
cg23186333	11	35161900	R	CD44	Body	-0.269203	0.0185896	1.58987e-47	-0.301038	0.0188532	2.15306e-57
cg18333339	3	112885856	R			-0.254166	0.017552	1.60332e-47	-0.207751	0.01764	5.11048e-32
cg03399905	15	79576060	R	ANKRD34C	5'UTR	0.244701	0.0168998	1.63129e-47	0.250587	0.0169687	2.37099e-49
cg15485728	9	79521359	R	PRUNE2	TSS1500	0.221629	0.0153207	1.98792e-47	0.188458	0.015661	2.36509e-33
cg22095604	18	31803241	F	NOL4	1stExon	0.189638	0.0131166	2.23595e-47	0.16369	0.0134477	4.36191e-34
cg24818566	9	122132054	F	DBC1	TSS1500	0.195069	0.0134933	2.27353e-47	0.138629	0.0131037	3.71322e-26
cg11909748	19	52956674	R	ZNF578	TSS200	0.216717	0.0149943	2.389e-47	0.204235	0.0146731	4.8592e-44
cg12453631	3	157812226	F			0.211079	0.0146053	2.42575e-47	0.214669	0.0147271	3.96349e-48
cg03956042	3	194206497	R			-0.21514	0.0148888	2.51355e-47	-0.20088	0.0147554	3.3084e-42
cg05266781	16	54965492	F	IRX5	Body	0.218747	0.015139	2.53387e-47	0.178505	0.0154302	5.9466e-31
cg19510626	1	113934971	F	MAGI3	Body	-0.247686	0.0171426	2.56049e-47	-0.204913	0.0179634	3.84876e-30
cg06878361	19	52390810	R	ZNF577	Body	0.226302	0.0156653	2.6563e-47	0.20768	0.0164983	2.46017e-36
cg26078977	5	59189467	F	PDE4D	Body	0.194505	0.0134665	2.7485e-47	0.157408	0.0140144	2.8423e-29
cg14699728	11	66188522	R	NPAS4	5'UTR	0.19636	0.0135954	2.77201e-47	0.147941	0.0137042	3.62255e-27
cg23836737	4	53411703	F			-0.265618	0.0184017	3.143e-47	-0.249574	0.0188832	7.02404e-40
cg16519487	13	20876063	R			0.187707	0.0130083	3.36197e-47	0.161915	0.0137997	8.60714e-32
cg13448753	10	25464059	F	LOC100128811	Body	0.211492	0.0146567	3.36337e-47	0.165395	0.0151515	9.65841e-28
cg22682811	20	21372462	F			0.230818	0.0159995	3.5212e-47	0.221133	0.0164544	3.56608e-41
cg13806741	11	82443436	R	FAM181B	1stExon	0.253216	0.0175552	3.65539e-47	0.225727	0.0184341	1.7846e-34
cg00318320	2	242498098	R	BOK	TSS200	0.243333	0.0168796	4.11989e-47	0.214063	0.0168091	3.77989e-37
cg10117719	1	36181173	R	C1orf216	3'UTR	-0.184269	0.0127836	4.19823e-47	-0.174405	0.0125498	6.60435e-44
cg06424065	4	6247640	R			0.196783	0.0136545	4.37747e-47	0.148305	0.0135368	6.23981e-28
cg06558502	19	57610699	R			0.214203	0.0148657	4.52628e-47	0.18795	0.0149777	4.04223e-36
cg27252696	6	100912940	R	SIM1	TSS1500	0.228045	0.0158265	4.53983e-47	0.201353	0.016002	2.61894e-36
cg19407095	13	112721778	R	SOX1	TSS200	0.2196	0.0152457	4.87743e-47	0.191557	0.0151544	1.26457e-36
cg19414741	8	57358240	R	PENK	Body	0.21268	0.0147697	5.19254e-47	0.186167	0.0150555	4.02408e-35
cg24927800	2	220283214	F	DES	1stExon	0.236491	0.0164236	5.2109e-47	0.182177	0.0172161	3.62073e-26
cg06674731	2	154335014	F	RPRM	1stExon	0.223626	0.0155329	5.4087e-47	0.143239	0.0161352	6.84419e-19
cg09643544	19	9473696	F	ZNF177	1stExon	0.216257	0.0150219	5.47663e-47	0.202381	0.0153574	1.17352e-39
cg21117668	2	242498349	F	BOK	5'UTR	0.251197	0.0174505	5.57649e-47	0.230181	0.0181261	5.9992e-37
cg18679410	3	26664308	R	LRRC3B	1stExon	0.206199	0.0143246	5.58583e-47	0.163885	0.0148677	2.96393e-28
cg19965221	15	30114474	F	TJP1	5'UTR	0.217136	0.0150853	5.6564e-47	0.186035	0.0155251	4.37253e-33
cg18159860	5	72678420	F			0.189946	0.0131997	5.95975e-47	0.154423	0.0133949	9.47537e-31
cg27320127	2	47798396	R	KCNK12	TSS1500	0.228982	0.0159144	6.12457e-47	0.22609	0.0163916	2.80536e-43
cg27392792	7	158380886	R	PTPRN2	TSS1500	0.231754	0.0161153	6.81531e-47	0.197222	0.0164178	3.04669e-33
cg02347074	2	223155925	F	PAX3	Body	0.211893	0.0147433	7.73756e-47	0.17611	0.01509	1.80032e-31
cg07967679	12	52626814	F	KRT7	TSS200	0.199851	0.0139076	7.99832e-47	0.15169	0.0140144	2.65238e-27
cg02456288	14	38053308	F			0.19964	0.013894	8.11723e-47	0.163995	0.0139956	1.03485e-31
cg16547027	18	24127588	R	KCTD1	5'UTR	0.217927	0.0151719	8.72829e-47	0.225069	0.0154455	4.24024e-48
cg11741201	11	35638398	R	FJX1	TSS1500	-0.253004	0.0176158	8.91967e-47	-0.306862	0.0180941	1.64556e-64
cg19663246	7	32339095	R			-0.255844	0.0178212	9.75647e-47	-0.216176	0.0185308	1.90677e-31
cg18358869	10	102808077	R			0.212898	0.0148303	9.82842e-47	0.200656	0.0152151	1.02967e-39
cg20964856	19	41767669	R	HNRNPUL1	TSS1500	-0.228776	0.0159525	1.21102e-46	-0.241953	0.0160648	2.92096e-51
cg19375479	19	44952604	R	ZNF229	5'UTR	0.200291	0.0139675	1.2339e-46	0.170498	0.0143106	9.99237e-33
cg02164046	3	187388148	F	SST	1stExon	0.229666	0.016019	1.28327e-46	0.174162	0.0166926	1.74364e-25
cg01594949	9	140197890	F	NRARP	TSS1500	-0.22005	0.0153592	1.4863e-46	-0.187616	0.0159566	6.43118e-32
cg09232937	5	3595970	R	IRX1	TSS200	0.211181	0.0147431	1.5477e-46	0.19074	0.0144424	7.99904e-40
cg03055693	20	60910388	R	LAMA5	Body	-0.239792	0.0167407	1.5523e-46	-0.195811	0.0175372	6.01566e-29
cg14410016	2	176986659	F	HOXD9	TSS1500	0.195302	0.0136349	1.5574e-46	0.163221	0.0136485	5.83466e-33
cg06883496	13	28503235	R			0.214982	0.015011	1.60168e-46	0.179362	0.0149965	5.73947e-33
cg00891995	1	153113262	R	SPRR2C	Body	-0.267116	0.0186526	1.62807e-46	-0.246188	0.0194854	1.36321e-36
cg08874609	5	126626360	R	MEGF10	TSS200	0.184345	0.012878	1.7698e-46	0.167799	0.0131483	2.67166e-37
cg17759274	19	39260954	F			0.244046	0.0170516	1.83691e-46	0.162219	0.0181899	4.74345e-19
cg14034476	19	3556718	F	C19orf28	Body	-0.258479	0.0180621	1.88011e-46	-0.25222	0.0184198	1.11911e-42
cg03520471	3	97753623	F	GABRR3	Body	-0.234859	0.0164155	1.97639e-46	-0.219199	0.0161517	5.92986e-42
cg04839289	14	24045274	F	JPH4	Body	0.220678	0.0154331	2.21969e-46	0.189078	0.0157607	3.69116e-33
cg16061498	18	55095886	F			0.224327	0.0156943	2.4016e-46	0.218754	0.0164721	3.01544e-40
cg07502389	8	24771259	F	NEFM	TSS200	0.246149	0.0172218	2.42534e-46	0.222435	0.0178923	1.75391e-35
cg02010196	5	146889275	F			0.213133	0.0149183	2.65038e-46	0.160717	0.015274	6.82221e-26
cg04400972	1	117665053	R	TRIM45	TSS1500	0.252236	0.0176585	2.74968e-46	0.226967	0.017984	1.62689e-36
cg11546137	2	176972563	F	HOXD11	1stExon	0.223241	0.0156295	2.77971e-46	0.166058	0.0160552	4.5035e-25
cg22894896	17	29886890	R	MIR193A	TSS200	0.229919	0.0161033	3.01042e-46	0.2189	0.0169809	5.06438e-38
cg14747813	8	23848786	R			-0.243919	0.0170881	3.16939e-46	-0.23671	0.0177845	2.02769e-40
cg22361181	17	40171740	R	NKIRAS2	TSS1500	-0.233552	0.016367	3.38194e-46	-0.235552	0.0164396	1.45654e-46
cg02571816	19	38747378	R	PPP1R14A	TSS1500	0.22184	0.0155488	3.49871e-46	0.207167	0.0161299	9.33751e-38
cg26685941	13	95952902	R	ABCC4	Body	-0.212645	0.0149097	3.76605e-46	-0.191795	0.0156331	1.33735e-34
cg02898293	20	25061762	R	VSX1	Body	0.219861	0.015418	3.88397e-46	0.206428	0.0161446	1.95858e-37
cg22815110	1	63788933	F	FOXD3	1stExon	0.235125	0.0164928	4.1008e-46	0.171748	0.0169932	5.1516e-24
cg10917602	16	30996630	R	HSD3B7	5'UTR	-0.213736	0.0149926	4.10896e-46	-0.211649	0.0151026	1.27723e-44
cg13246235	6	12749978	F	PHACTR1	Body	0.187148	0.0131301	4.27113e-46	0.172057	0.0127453	1.57217e-41
cg07208703	7	47294094	R			0.222071	0.0155842	4.50087e-46	0.164091	0.0162337	5.08926e-24
cg17496659	1	3568245	F	TP73	TSS1500	0.20624	0.0144747	4.59002e-46	0.176314	0.0152668	7.48606e-31
cg04598121	8	57358505	R	PENK	Body	0.215392	0.015122	4.90953e-46	0.188772	0.0153881	1.35454e-34
cg10137837	17	6926742	F	BCL6B	5'UTR	0.205826	0.0144527	5.07769e-46	0.207748	0.015019	1.62641e-43
cg08426733	1	1376740	R	VWA1	3'UTR	-0.243341	0.0170946	5.55752e-46	-0.201419	0.0181759	1.54044e-28
cg12296772	8	17271067	F	MTMR7	TSS200	0.195343	0.0137242	5.67402e-46	0.173979	0.0135798	1.41216e-37
cg25865120	15	48625058	R	DUT	Body	-0.226221	0.0158946	5.74784e-46	-0.216423	0.0153706	5.01338e-45
cg10472919	5	135266805	R	FBXL21	5'UTR	0.232858	0.0163649	6.04415e-46	0.17504	0.0172618	3.65947e-24
cg00529958	13	100624288	R	ZIC5	TSS200	0.192756	0.0135472	6.10273e-46	0.156666	0.0138645	1.31542e-29
cg00020991	4	169930429	R	CBR4	Body	-0.203029	0.0142738	6.50935e-46	-0.180328	0.0142835	1.53899e-36
cg12899747	3	25391527	R			-0.255724	0.0179799	6.61602e-46	-0.272682	0.0181751	7.01161e-51
cg12920180	14	31344444	F	COCH	Body	0.236503	0.0166307	6.80025e-46	0.189287	0.017281	6.39213e-28
cg04485799	22	50438356	R	IL17REL	Body	0.22764	0.0160078	6.83419e-46	0.177127	0.0168583	8.03687e-26
cg04084157	7	100809049	F	VGF	TSS200	0.236604	0.016639	6.90232e-46	0.241136	0.0166708	2.0275e-47
cg27076669	12	69327457	F	CPM	TSS1500	0.229397	0.0161353	7.17787e-46	0.194375	0.0168824	1.12817e-30
cg00503840	7	96650509	F	DLX5	Body	0.236331	0.0166257	7.42136e-46	0.242267	0.0172453	7.89189e-45
cg25461801	13	100630316	F			0.207965	0.0146306	7.46074e-46	0.155128	0.0147539	7.41818e-26
cg21743907	7	129423053	F			0.236819	0.0166612	7.52007e-46	0.164889	0.0171926	8.75207e-22
cg06158650	1	119522637	F	TBX15	5'UTR	0.213243	0.0150047	7.74869e-46	0.150639	0.0152993	7.12208e-23
cg24488891	10	25464132	F	LOC100128811	Body	0.20003	0.0140831	8.71287e-46	0.17485	0.0142105	8.58839e-35
cg14512563	15	96897190	R			0.176493	0.0124275	8.92833e-46	0.149503	0.0130093	1.44703e-30
cg16624521	5	172064552	F			-0.246773	0.0173775	9.07375e-46	-0.228148	0.0180475	1.24597e-36
cg03391684	1	14925524	R	KIAA1026	1stExon	0.222533	0.0156754	9.65318e-46	0.16538	0.0159806	4.23823e-25
cg26664161	5	135265937	R	FBXL21	TSS200	0.213542	0.0150439	9.89769e-46	0.163155	0.0156829	2.39314e-25
cg15427886	8	55379663	F			0.220576	0.0155431	1.0377e-45	0.205948	0.0158918	2.07846e-38
cg10927449	2	63286621	R			0.223787	0.0157711	1.06204e-45	0.144059	0.0162672	8.30965e-19
cg18257814	2	55646430	R	CCDC88A	5'UTR	0.194328	0.0137011	1.16005e-45	0.171207	0.0144799	2.94084e-32
cg04455430	1	50886920	F	DMRTA2	Body	0.241042	0.0169973	1.19897e-45	0.212654	0.016895	2.4959e-36
cg06713632	19	49576056	R	KCNA7	1stExon	0.205975	0.0145251	1.20835e-45	0.171406	0.0149744	2.44607e-30
cg16458596	14	99584812	F			0.189828	0.0133883	1.24113e-45	0.169842	0.0139213	3.10038e-34
cg05962092	19	49575664	R	KCNA7	1stExon	0.230027	0.016224	1.2512e-45	0.24714	0.0169005	1.99497e-48
cg22947000	16	81272281	R	BCMO1	TSS200	-0.211916	0.0149475	1.26499e-45	-0.185385	0.0150431	6.75831e-35
cg05350411	4	569174	R			0.229708	0.0162047	1.30112e-45	0.183804	0.0166422	2.33254e-28
cg15672768	5	140741220	R	PCDHGA4	Body	0.206698	0.0145827	1.3241e-45	0.187625	0.015098	1.86102e-35
cg06533244	6	27258460	R			0.240695	0.016983	1.35256e-45	0.18485	0.0167684	2.93723e-28
cg07850527	16	89268040	F			0.220627	0.01557	1.40404e-45	0.199982	0.0155965	1.23076e-37
cg19802138	13	112722719	F	SOX1	1stExon	0.206971	0.0146067	1.41264e-45	0.187236	0.0143556	6.98559e-39
cg15989068	2	5837057	R	SOX11	3'UTR	0.208212	0.0146977	1.48055e-45	0.148855	0.0151911	1.13918e-22
cg03074925	6	10425625	R			0.21644	0.0152856	1.62702e-45	0.180932	0.0148328	3.18158e-34
cg00753885	12	57401797	R			-0.250377	0.017691	1.79577e-45	-0.240269	0.0183064	2.37138e-39
cg03496114	17	80329459	R			0.205795	0.0145484	1.99081e-45	0.118181	0.0152366	8.73758e-15
cg18964582	1	236557182	R	EDARADD	TSS1500	-0.255685	0.0180801	2.09813e-45	-0.228922	0.018415	1.76856e-35
cg23341182	10	102046768	F	BLOC1S2	TSS1500	-0.248682	0.0175861	2.12908e-45	-0.237539	0.0179373	4.97163e-40
cg23049291	1	165204745	F	LMX1A	Body	0.206118	0.0145913	2.62326e-45	0.181927	0.0150074	8.03109e-34
cg12940822	5	127873397	R	FBN2	1stExon	0.207635	0.0147034	2.79543e-45	0.178942	0.0152126	6.07107e-32
cg19211800	6	114179013	F	MARCKS	1stExon	0.20029	0.0141856	2.88881e-45	0.144583	0.0148041	1.56886e-22
cg01663016	5	168727752	R	SLIT3	5'UTR	0.230679	0.0163381	2.89677e-45	0.158176	0.0171601	3.03684e-20
cg07788092	19	9473691	F	ZNF177	TSS200	0.220745	0.0156366	2.9758e-45	0.205638	0.0159781	6.64346e-38
cg26770907	16	48844808	R			0.198932	0.0140927	3.02952e-45	0.18894	0.0142081	2.37724e-40
cg10676084	15	27017560	R	GABRB3	Body	0.214037	0.0151631	3.04239e-45	0.175412	0.0153278	2.51938e-30
cg03840594	6	99283553	F	POU3F2	1stExon	0.212535	0.0150618	3.25369e-45	0.194831	0.015396	1.05377e-36
cg20052760	6	10510789	F			-0.235843	0.0167145	3.28957e-45	-0.231726	0.0166665	6.01407e-44
cg23322933	14	61109207	R			0.211192	0.0149741	3.59567e-45	0.165352	0.0151365	8.84867e-28
cg13586599	6	25652383	R	SCGN	TSS200	0.203626	0.0144463	4.05215e-45	0.171446	0.0143589	7.31761e-33
cg14646983	9	34602974	R			-0.179588	0.0127452	4.33541e-45	-0.159008	0.012983	1.73534e-34
cg18541254	13	112709550	F			0.206836	0.0146797	4.38068e-45	0.171167	0.0148269	7.88175e-31
cg15895690	14	60982635	F			0.205571	0.0145974	4.84833e-45	0.18332	0.015109	7.04761e-34
cg00295572	1	3568236	F	TP73	TSS1500	0.210067	0.0149171	4.88035e-45	0.168634	0.0154894	1.32821e-27
cg08509172	19	19383838	R	TM6SF2	Body	0.20451	0.0145319	5.55415e-45	0.179636	0.014887	1.58468e-33
cg23449696	3	147125942	F	ZIC1	TSS1500	0.213385	0.0151629	5.57673e-45	0.192726	0.0153999	6.19919e-36
cg03337035	19	42258336	R	CEACAM6	TSS1500	-0.204431	0.0145277	5.66502e-45	-0.183329	0.014244	6.58966e-38
cg18247055	10	22634226	R	SPAG6	TSS200	0.22312	0.0158597	5.94721e-45	0.188391	0.0160325	7.01188e-32
cg15957055	3	62861055	R	CADPS	5'UTR	0.208971	0.0148557	6.08313e-45	0.162546	0.0150662	3.89013e-27
cg09469566	13	112717244	R			0.199023	0.0141577	6.91964e-45	0.148865	0.0146915	3.95544e-24
cg06708720	12	1099075	F	ERC1	TSS1500	-0.120191	0.00855293	7.42667e-45	-0.109817	0.00968238	8.12826e-30
cg10221746	1	156629412	F			-0.247222	0.0175932	7.47514e-45	-0.230906	0.0179299	5.96546e-38
cg20906291	6	10382103	R			0.206509	0.0147027	8.18921e-45	0.179872	0.0147053	2.10186e-34
cg08453194	6	41904398	F	CCND3	Body	-0.224382	0.0159832	9.0458e-45	-0.230286	0.0164293	1.23079e-44
cg13080565	6	101846797	R	GRIK2	TSS200	0.201087	0.0143263	9.35762e-45	0.19086	0.0145305	2.07208e-39
cg08526991	2	5831394	R	SOX11	TSS1500	0.182327	0.0129917	9.64198e-45	0.136629	0.012933	4.36088e-26
cg01449663	17	8926249	R	NTN1	Body	0.211539	0.0150786	1.03478e-44	0.202725	0.015164	9.19999e-41
cg17721618	15	42376692	R	PLA2G4D	Body	-0.240136	0.0171209	1.08311e-44	-0.235351	0.0178469	1.03985e-39
cg10721149	6	25652405	R	SCGN	TSS200	0.195363	0.0139325	1.14274e-44	0.168908	0.0132625	3.74146e-37
cg00008033	19	52429980	R	ZNF613	TSS1500	0.211289	0.0150684	1.14287e-44	0.193275	0.0152159	5.74834e-37
cg17098147	10	22634142	F	SPAG6	TSS1500	0.214888	0.0153259	1.15633e-44	0.191683	0.0157622	5.01988e-34
cg14609289	17	77083037	F	ENGASE	3'UTR	-0.259296	0.0184936	1.16222e-44	-0.244102	0.0196737	2.37826e-35
cg00193668	9	35814283	F	HINT2	Body	-0.23533	0.0167847	1.1672e-44	-0.210727	0.0159078	4.711e-40
cg03129384	10	128994644	F	FAM196A	TSS1500	0.210414	0.0150095	1.19761e-44	0.144776	0.0152582	2.34618e-21
cg14837598	8	21916635	R	EPB49	TSS200	-0.236286	0.0168579	1.2388e-44	-0.190964	0.018093	4.83984e-26
cg00848780	19	46174455	F	GIPR	Body	0.17548	0.0125228	1.30177e-44	0.145008	0.013145	2.69582e-28
cg01047555	6	127835990	F	C6orf174	Body	0.206118	0.014714	1.38758e-44	0.184362	0.015196	7.12514e-34
cg14631834	18	28623040	F	DSC3	TSS1500	0.178958	0.0127825	1.55401e-44	0.139775	0.0132484	5.06414e-26
cg14950321	19	4530233	R	PLIN5	Body	-0.208874	0.0149201	1.5697e-44	-0.201321	0.0150953	1.41711e-40
cg23592947	1	63786306	F			0.194658	0.0139074	1.63255e-44	0.149684	0.0141901	5.16027e-26
cg27312979	10	97094453	F	SORBS1	Body	-0.257519	0.0184085	1.81682e-44	-0.243777	0.0192792	1.19858e-36
cg21915074	7	72351001	R	POM121	5'UTR	-0.215407	0.0153987	1.82892e-44	-0.213783	0.015513	3.3237e-43
cg24058132	14	88459866	F	GALC	1stExon	-0.210838	0.01508	2.02876e-44	-0.22029	0.0153775	1.5167e-46
cg15168727	5	72599228	R			0.198458	0.0141957	2.06118e-44	0.171388	0.0146038	8.35015e-32
cg11751101	12	7244660	R	C1R	Body	-0.250475	0.0179199	2.14108e-44	-0.28323	0.0183979	1.77707e-53
cg17025835	7	123673331	F	TMEM229A	1stExon	0.227235	0.0162575	2.14556e-44	0.163299	0.0164805	3.81864e-23
cg23683588	14	37136283	F	PAX9	Body	0.187336	0.013405	2.2111e-44	0.132863	0.0138352	7.7477e-22
cg06793562	6	85482570	R			0.211708	0.0151499	2.23973e-44	0.16522	0.0159341	3.43192e-25
cg16640358	2	239892057	R			-0.20728	0.0148447	2.61252e-44	-0.221393	0.0149423	1.14635e-49
cg22579265	10	94180383	R			0.203996	0.0146114	2.68175e-44	0.168259	0.0151582	1.25213e-28
cg13683040	9	37035766	R	PAX5	TSS1500	0.191223	0.0136989	2.77319e-44	0.144932	0.0143661	6.21209e-24
cg25657261	5	140723858	R	PCDHGA2	Body	0.232181	0.0166419	3.07806e-44	0.225275	0.0165521	3.48983e-42
cg11847992	5	95590917	F			-0.254949	0.0182757	3.13969e-44	-0.229737	0.0190158	1.32428e-33
cg05242244	12	53553086	R	CSAD	Body	-0.235952	0.0169167	3.24048e-44	-0.250759	0.0166753	4.15548e-51
cg21498772	8	63161077	R	NKAIN3	TSS1500	0.188278	0.0134992	3.26561e-44	0.143002	0.0141168	4.07115e-24
cg07552707	20	44519093	F	CTSA	TSS1500	0.192722	0.0138182	3.28024e-44	0.125013	0.0144266	4.49704e-18
cg00451635	16	10675030	R	EMP2	TSS1500	-0.264327	0.0189544	3.35463e-44	-0.233981	0.0193009	7.99769e-34
cg25316339	5	79866379	F	ANKRD34B	TSS200	0.229526	0.016467	3.69367e-44	0.199662	0.0168165	1.6354e-32
cg12868305	19	12146439	R	ZNF433	1stExon	0.208482	0.0149631	3.98827e-44	0.13719	0.0156069	1.49104e-18
cg13633270	18	55095555	R			0.207669	0.0149146	4.53454e-44	0.170044	0.0148443	2.2147e-30
cg18445088	22	40081812	F	CACNA1I	Body	0.234029	0.0168161	4.99598e-44	0.207124	0.0177047	1.2929e-31
cg06346138	1	17086071	R	MST1P9	Body	0.206344	0.0148275	5.03955e-44	0.148117	0.0149739	4.5247e-23
cg08558886	2	151469837	F			-0.246816	0.0177377	5.15311e-44	-0.241223	0.0182283	5.62985e-40
cg03342498	6	10411372	R	TFAP2A	Body	0.197318	0.014182	5.261e-44	0.157631	0.0142283	1.59173e-28
cg26166595	11	11998715	F	DKK3	Body	-0.25087	0.0180315	5.29475e-44	-0.256353	0.0177957	4.7872e-47
cg01158574	2	11809997	R	NTSR2	1stExon	0.222276	0.0159766	5.31107e-44	0.177915	0.0165045	4.28741e-27
cg24711336	10	80063791	R			-0.236749	0.0170206	5.54293e-44	-0.204634	0.0165477	3.97486e-35
cg04927004	20	61809348	F	MIR124-3	TSS1500	0.19529	0.0140438	5.84255e-44	0.13877	0.0160653	5.72675e-18
cg06661266	3	134027721	R			-0.251863	0.0181126	5.87518e-44	-0.23325	0.0182092	1.4515e-37
cg14532755	4	1762460	R			-0.246482	0.017727	5.96491e-44	-0.247181	0.0185633	1.87963e-40
cg23077820	2	223154176	F	PAX3	Body	0.220062	0.0158269	5.96698e-44	0.207739	0.0157102	6.4469e-40
cg11429969	5	140180921	R	PCDHA2	Body	0.180579	0.0129951	6.70602e-44	0.185799	0.0130932	1.05048e-45
cg00019759	1	212687842	R			0.239731	0.0172535	6.82528e-44	0.21421	0.0180391	1.60027e-32
cg11231631	11	60553755	R	MS4A10	5'UTR	-0.175157	0.0126084	7.06696e-44	-0.146081	0.0124196	6.1176e-32
cg25143508	1	203449947	F	PRELP	5'UTR	-0.235988	0.0169925	7.51216e-44	-0.254002	0.0167195	3.99522e-52
cg21895526	18	24765490	F	CHST9	TSS1500	0.196907	0.0141805	7.72747e-44	0.171889	0.0145749	4.21692e-32
cg13902210	1	110754436	F	KCNC4	1stExon	0.243875	0.0175734	8.67359e-44	0.242811	0.0179951	1.71603e-41
cg01150683	10	111216646	F			0.185434	0.013364	8.89724e-44	0.155934	0.0137545	8.60977e-30
cg00387658	20	54986793	F	CASS4	TSS1500	-0.243831	0.0175737	9.01085e-44	-0.233877	0.0178041	2.04408e-39
cg22328786	20	35491355	F	C20orf117	1stExon	0.210693	0.0151902	9.58844e-44	0.139471	0.0157153	7.00072e-19
cg16361302	2	19561327	F			0.235534	0.0169816	9.63226e-44	0.185346	0.0172614	6.77578e-27
cg04689379	19	46171262	F	GIPR	TSS1500	-0.23164	0.0167019	9.74915e-44	-0.199948	0.0177422	1.85328e-29
cg22133973	6	170789640	F			-0.230915	0.0166498	9.77292e-44	-0.232662	0.0172975	3.05313e-41
cg16664405	10	111216962	F			0.191615	0.0138196	1.02596e-43	0.167269	0.0137802	6.60869e-34
cg21011139	11	7695245	F	CYB5R2	TSS1500	0.215415	0.0155397	1.07264e-43	0.175855	0.0157682	6.95828e-29
cg14775286	3	137833494	F	DZIP1L	5'UTR	-0.241637	0.0174446	1.24313e-43	-0.220314	0.0177086	1.56378e-35
cg18483289	20	644897	F	SCRT2	Body	0.211951	0.0153017	1.24608e-43	0.160456	0.0153735	1.67663e-25
cg21553182	19	52956821	R	ZNF578	TSS200	0.204723	0.0147807	1.26029e-43	0.185916	0.0147338	1.67272e-36
cg05835105	4	111543401	R	PITX2	Body	0.197604	0.0142704	1.32354e-43	0.166229	0.0142363	1.68187e-31
cg10092878	7	73038859	F	MLXIPL	1stExon	0.216753	0.0156541	1.33777e-43	0.178975	0.0162133	2.48386e-28
cg10488267	6	58147625	R			0.16512	0.0119266	1.37012e-43	0.134399	0.0132845	4.6455e-24
cg04600297	19	42750575	F			-0.227082	0.0164068	1.44705e-43	-0.215981	0.0169854	4.83962e-37
cg18235937	1	6268858	R	RNF207	Body	0.214195	0.0154757	1.44759e-43	0.141287	0.0159983	1.03397e-18
cg11896587	19	39440734	R	FBXO17	Body	0.176072	0.0127214	1.44965e-43	0.151513	0.0127523	1.48219e-32
cg12188986	11	93063886	R	CCDC67	1stExon	0.209283	0.0151226	1.48073e-43	0.160728	0.0157736	2.2046e-24
cg03758021	20	62208140	R			-0.225764	0.0163175	1.55322e-43	-0.177367	0.0169055	9.43586e-26
cg04885881	1	11123118	F			-0.220149	0.0159173	1.66079e-43	-0.19624	0.0168079	1.70247e-31
cg09623400	20	24450353	F	TMEM90B	5'UTR	0.218343	0.0157932	1.79703e-43	0.200613	0.0161427	1.85469e-35
cg20128928	4	104640560	R	TACR3	1stExon	0.210404	0.0152235	1.90348e-43	0.205917	0.0150424	1.17928e-42
cg07949989	6	26747075	R			0.198304	0.0143482	1.90827e-43	0.163824	0.0143101	2.40176e-30
cg08767286	2	237077265	F	GBX2	TSS1500	0.200186	0.0144854	1.93534e-43	0.152136	0.0145715	1.61696e-25
cg25570486	20	61621446	R			-0.236281	0.0170973	1.93662e-43	-0.226765	0.017787	3.16086e-37
cg25148589	4	158141936	F	GRIA2	1stExon	0.231033	0.0167186	1.96092e-43	0.207857	0.0170016	2.26608e-34
cg18358723	5	87955618	R	LOC645323	Body	0.209035	0.0151268	1.96266e-43	0.201012	0.0154671	1.28739e-38
cg00101260	17	53426657	R			-0.247842	0.017941	2.08969e-43	-0.250508	0.0176516	1.02953e-45
cg19098763	1	50513661	R	ELAVL4	TSS200	0.210895	0.0152719	2.23921e-43	0.18247	0.0156241	1.6372e-31
cg26088662	5	159399005	R	ADRA1B	Body	0.231657	0.0167785	2.32065e-43	0.169433	0.0174609	2.91178e-22
cg09424759	1	234040781	F	SLC35F3	1stExon	0.219524	0.0159011	2.35676e-43	0.149231	0.0162987	5.38601e-20
cg06410746	8	63161676	F	NKAIN3	1stExon	0.195241	0.0141492	2.59359e-43	0.144701	0.0146375	4.80358e-23
cg25627226	18	4455337	R			0.207292	0.0150242	2.64963e-43	0.172006	0.0154454	8.33924e-29
cg20942223	7	155251040	F	EN2	1stExon	0.214359	0.0155364	2.65029e-43	0.153425	0.0160447	1.15099e-21
cg09648727	17	79361742	R			-0.220883	0.016013	2.7699e-43	-0.198583	0.0166056	5.8366e-33
cg02018902	15	79576149	F	ANKRD34C	5'UTR	0.223781	0.0162235	2.78321e-43	0.20295	0.0164128	4.02448e-35
cg05080154	18	76739409	F	SALL3	TSS1500	0.228585	0.0165719	2.78795e-43	0.173846	0.0168545	6.06186e-25
cg03607117	3	53080440	F	SFMBT1	TSS1500	0.249288	0.0180768	2.90666e-43	0.25732	0.0182299	3.05757e-45
cg23889730	14	94254131	R	PRIMA1	5'UTR	0.181127	0.0131396	3.142e-43	0.13274	0.0131803	7.41794e-24
cg07035165	5	113698506	R	KCNN2	1stExon	0.201738	0.0146359	3.19215e-43	0.168201	0.0151514	1.23518e-28
cg04581938	6	31364999	R			-0.254337	0.0184526	3.21389e-43	-0.231586	0.0189034	1.65894e-34
cg14875171	2	50574196	R	NRXN1	Body	0.167095	0.0121232	3.22053e-43	0.135042	0.0125685	6.29542e-27
cg25191850	1	233749633	F	KCNK1	TSS200	0.194885	0.0141394	3.22246e-43	0.162083	0.0141132	1.57851e-30
cg09142313	5	72677859	R			0.210366	0.0152664	3.3789e-43	0.172268	0.0156447	3.3725e-28
cg03925294	4	6247629	R			0.194245	0.0140975	3.42335e-43	0.155969	0.0138523	2.08088e-29
cg05405914	16	8972233	F			-0.243012	0.0176368	3.42404e-43	-0.216091	0.0172357	4.65894e-36
cg17362434	11	69832232	F			0.209022	0.0151701	3.42988e-43	0.156976	0.0152751	8.98077e-25
cg25861699	6	10882050	F	GCM2	1stExon	0.216811	0.0157356	3.43854e-43	0.189895	0.0159455	1.06187e-32
cg20985755	3	24536474	R	THRB	TSS200	0.198579	0.0144127	3.45514e-43	0.157132	0.015055	1.67686e-25
cg01236132	13	112723581	F	SOX1	1stExon	0.216788	0.015743	3.83846e-43	0.17141	0.0158996	4.24237e-27
cg07120346	6	58141890	F			0.175404	0.012742	4.09381e-43	0.140424	0.012919	1.60863e-27
cg20119148	19	18344195	R	PDE4C	5'UTR	0.247194	0.0179591	4.17874e-43	0.226884	0.0182584	1.88215e-35
cg08739433	1	113051925	R	WNT2B	Body	0.231724	0.0168352	4.18274e-43	0.211124	0.0174617	1.18283e-33
cg13782301	6	32116875	F	PRRT1	3'UTR	0.237288	0.0172406	4.23713e-43	0.186885	0.0181187	6.06188e-25
cg03431918	17	77716367	R			-0.254943	0.0185274	4.41521e-43	-0.271678	0.0190423	3.51109e-46
cg27209578	2	175193470	F			0.191479	0.0139157	4.43799e-43	0.157365	0.0143458	5.36133e-28
cg00419314	4	74735092	R	CXCL1	TSS200	0.174149	0.0126571	4.49448e-43	0.135234	0.0129673	1.83133e-25
cg10530883	5	3596207	F	IRX1	1stExon	0.20931	0.0152127	4.50123e-43	0.1896	0.0154324	1.07919e-34
cg12278474	1	5221357	F			-0.248153	0.018036	4.51353e-43	-0.23757	0.0184659	7.05401e-38
cg08737116	1	116563487	F	SLC22A15	Body	-0.255367	0.0185693	4.94493e-43	-0.234135	0.0185983	2.42517e-36
cg26195356	5	2743601	R			0.200653	0.0145938	5.15218e-43	0.165079	0.0149669	2.75141e-28
cg26549701	5	72599503	F			0.205599	0.0149543	5.19877e-43	0.177545	0.0150762	5.15733e-32
cg19590421	14	51327604	R			-0.237042	0.0172468	5.52268e-43	-0.251012	0.0172316	4.55528e-48
cg19470159	3	167967842	F	C3orf50	Body	0.216047	0.0157226	5.75515e-43	0.203164	0.0159499	3.65434e-37
cg19922137	1	210111561	F	SYT14	1stExon	0.221087	0.0160897	5.77175e-43	0.195374	0.0165448	3.51834e-32
cg02305853	20	1165435	R	C20orf46	TSS1500	0.188934	0.013752	5.95528e-43	0.152197	0.014349	2.77031e-26
cg18969232	2	45156937	R			0.220687	0.0160656	6.1254e-43	0.156158	0.0163646	1.3958e-21
cg27062795	19	56879613	R	ZNF542	TSS200	0.211195	0.0153787	6.44438e-43	0.158687	0.0157484	7.02718e-24
cg22655696	10	131757191	F	EBF3	Body	0.221363	0.0161204	6.54194e-43	0.156133	0.0161281	3.63728e-22
cg25044651	5	115298720	F	LVRN	1stExon	0.214564	0.015628	6.76277e-43	0.187906	0.016136	2.42907e-31
cg26134895	5	15500270	R	FBXL7	TSS200	0.218974	0.01595	6.82722e-43	0.176402	0.0160662	4.78698e-28
cg23488804	17	42393982	F	RUNDC3A	Body	0.216062	0.0157383	6.8639e-43	0.136894	0.0167211	2.67988e-16
cg00062437	22	23728539	R			-0.225924	0.0164623	7.3178e-43	-0.184218	0.0159887	1.02523e-30
cg14582763	19	52956683	R	ZNF578	TSS200	0.20771	0.0151389	7.67236e-43	0.186464	0.0150993	4.9225e-35
cg13478228	18	70209432	R	CBLN2	5'UTR	0.20352	0.0148346	7.78253e-43	0.148037	0.0155209	1.45771e-21
cg14750948	3	147130477	F	ZIC1	Body	0.20355	0.0148434	8.46915e-43	0.148969	0.0151561	8.44379e-23
cg12069267	4	1407858	F			0.219847	0.0160331	8.59973e-43	0.168903	0.0159553	3.46032e-26
cg01666793	19	54485460	F	CACNG8	Body	0.221563	0.0161641	9.21121e-43	0.185839	0.0166349	5.61672e-29
cg01693026	14	102026953	F	DIO3	TSS1500	0.212744	0.0155212	9.25577e-43	0.151968	0.0160487	2.82176e-21
cg08998192	6	32805570	F	TAP2	Body	-0.250985	0.0183178	9.92061e-43	-0.258531	0.0188332	6.95957e-43
cg00495775	2	176972041	R	HOXD11	TSS200	0.211403	0.015436	1.08017e-42	0.184794	0.0152863	1.20943e-33
cg26307359	17	27332646	R	SEZ6	Body	0.205519	0.0150108	1.1427e-42	0.187168	0.0156383	5.19044e-33
cg14095048	22	25342876	F			-0.243485	0.0177923	1.25048e-42	-0.215422	0.0183117	5.97018e-32
cg14631386	8	93114305	R			0.185919	0.0135878	1.2867e-42	0.158473	0.0137863	1.39889e-30
cg07495704	14	104091483	R			-0.203355	0.0148638	1.31435e-42	-0.18308	0.0144379	7.58762e-37
cg01974375	1	151298954	F	PI4KB	TSS1500	-0.252047	0.0184251	1.34556e-42	-0.265799	0.0186402	3.91841e-46
cg14621053	10	128077315	F	ADAM12	TSS200	0.184351	0.0134769	1.35449e-42	0.139743	0.0138231	5.02211e-24
cg10190416	19	40168876	R	LOC400696	TSS1500	-0.249804	0.018267	1.42915e-42	-0.213611	0.0189696	2.05026e-29
cg06737494	3	172167644	F	GHSR	TSS1500	0.225595	0.0164994	1.47371e-42	0.234434	0.0172251	3.48838e-42
cg15377283	8	55371369	R	SOX17	Body	0.199733	0.0146082	1.47852e-42	0.155118	0.0155955	2.61653e-23
cg04211115	17	13504008	R	HS3ST3A1	1stExon	0.205045	0.0149969	1.48226e-42	0.146133	0.0152584	9.96899e-22
cg05237641	10	128077307	F	ADAM12	TSS200	0.19097	0.0139695	1.52423e-42	0.132226	0.0143174	2.57515e-20
cg12392473	20	48099331	R	KCNB1	TSS200	0.212332	0.0155342	1.56127e-42	0.186506	0.015446	1.43623e-33
cg06987468	7	116963502	F	WNT2	TSS200	0.180293	0.0131919	1.59873e-42	0.121635	0.0132137	3.4086e-20
cg26424147	2	43055984	R			-0.242081	0.0177148	1.63219e-42	-0.20604	0.0172975	1.03056e-32
cg03216846	1	119543883	F			0.192839	0.0141153	1.71984e-42	0.161539	0.0149822	4.18388e-27
cg01664864	14	102027677	F	DIO3	TSS200	0.198695	0.0145457	1.75743e-42	0.157918	0.0149827	5.64636e-26
cg18345924	21	22372231	F	NCAM2	Body	-0.244266	0.0178824	1.77032e-42	-0.209664	0.0184804	7.83328e-30
cg14237550	1	16974585	R	MST1P2	Body	0.216777	0.0158714	1.8001e-42	0.211309	0.0164229	6.92529e-38
cg00237475	15	68118521	R	LBXCOR1	Body	0.223252	0.016347	1.83238e-42	0.201392	0.0166355	9.79667e-34
cg14345012	20	26189240	F	MIR663	TSS1500	0.196092	0.0143585	1.8366e-42	0.148695	0.0151831	1.2013e-22
cg07581732	21	39288729	R	KCNJ6	TSS200	0.189792	0.0139003	1.91698e-42	0.157701	0.0143306	3.63451e-28
cg12848065	2	207507528	F	LOC200726	5'UTR	0.212173	0.015541	1.95213e-42	0.204773	0.0155254	1.00821e-39
cg22929506	2	219137490	R	PNKD	3'UTR	-0.241116	0.0176612	1.95549e-42	-0.219272	0.0183469	6.37871e-33
cg08376141	6	32116591	R	PRRT1	3'UTR	0.16713	0.0122429	1.98668e-42	0.139715	0.0122912	6.10047e-30
cg10151367	11	2847642	R	KCNQ1	Body	0.162733	0.0119212	1.99893e-42	0.12996	0.0126166	6.99219e-25
cg19554389	3	55521134	R	WNT5A	1stExon	0.196001	0.0143584	2.00269e-42	0.162215	0.0145653	8.28241e-29
cg21512644	4	156130016	R	NPY2R	5'UTR	0.195108	0.0142948	2.04836e-42	0.153132	0.0150506	2.57772e-24
cg08483876	8	145910754	R			0.209266	0.0153346	2.11411e-42	0.209433	0.0152536	6.70882e-43
cg16290275	1	208042910	F			-0.208258	0.015263	2.17425e-42	-0.220561	0.015436	2.57118e-46
cg09887059	12	113916664	F			0.164181	0.0120373	2.33364e-42	0.130684	0.0123108	2.52654e-26
cg16546442	4	111539907	R	PITX2	Body	0.201333	0.0147626	2.37997e-42	0.179083	0.0148033	1.08813e-33
cg12756396	1	50886969	R	DMRTA2	Body	0.218518	0.0160255	2.45738e-42	0.157785	0.0162286	2.41415e-22
cg27344587	2	63275602	F	LOC100132215	TSS1500	0.211785	0.0155318	2.46132e-42	0.184175	0.0162581	9.51643e-30
cg15600488	8	17271119	F	MTMR7	TSS200	0.20111	0.0147572	2.73226e-42	0.162518	0.0147415	2.90909e-28
cg26675654	7	1269693	F			0.186102	0.0136578	2.80406e-42	0.137041	0.0142372	6.23426e-22
cg01889237	6	137816623	F	OLIG3	TSS1500	0.211823	0.0155465	2.8407e-42	0.207021	0.016003	2.80743e-38
cg13210467	7	99775443	F	STAG3	TSS200	0.233734	0.0171615	3.06037e-42	0.237902	0.0178651	1.85286e-40
cg17306747	5	1446165	F	SLC6A3	TSS1500	0.21099	0.0154949	3.18272e-42	0.173244	0.0155183	6.12763e-29
cg10150592	10	102440856	F			0.191273	0.0140495	3.29444e-42	0.173439	0.015118	1.81588e-30
cg10836101	19	30020886	F	VSTM2B	Body	0.23387	0.017181	3.39151e-42	0.207833	0.0172692	2.32966e-33
cg07234388	1	156261841	F	TMEM79	Body	-0.22715	0.0166931	3.6152e-42	-0.210406	0.0172406	2.95532e-34
cg22059812	1	19992564	F	HTR6	1stExon	0.21995	0.0161649	3.65774e-42	0.206538	0.0167132	4.42246e-35
cg05864140	2	220196530	F	RESP18	Body	0.203802	0.0149787	3.68194e-42	0.161736	0.0156784	5.97597e-25
cg22589628	12	45445385	F	DBX2	TSS1500	0.168516	0.0123854	3.69157e-42	0.149418	0.0121197	6.36555e-35
cg13434842	8	11567896	R	GATA4	Body	0.191264	0.0140612	3.88355e-42	0.152147	0.0151775	1.18909e-23
cg10111115	3	73674146	R	PDZRN3	TSS200	0.188501	0.0138589	3.92624e-42	0.14866	0.0140488	3.62499e-26
cg04436528	8	143554875	F	BAI1	Body	-0.244918	0.0180151	4.27883e-42	-0.239818	0.0159369	3.56196e-51
cg00695391	1	2525548	R	MMEL1	Body	-0.199278	0.0146595	4.35786e-42	-0.1947	0.0155153	4.03058e-36
cg14620572	9	127215669	R	GPR144	Body	0.221639	0.0163096	4.62299e-42	0.231993	0.0167876	1.95061e-43
cg20267101	3	113006232	R	BOC	3'UTR	-0.242142	0.01782	4.70574e-42	-0.214168	0.0183428	1.69355e-31
cg06352730	7	47621692	R			0.223588	0.0164554	4.75067e-42	0.198539	0.0166843	1.1872e-32
cg04061117	3	9594385	R	LHFPL4	5'UTR	0.187492	0.0138001	4.82993e-42	0.167725	0.0141969	3.29748e-32
cg15834072	4	155411603	F	DCHS2	1stExon	0.220486	0.0162309	4.95794e-42	0.14933	0.0168522	7.92149e-19
cg11667020	20	21378045	R	NKX2-4	5'UTR	0.231603	0.0170514	5.07452e-42	0.20599	0.0168898	3.26048e-34
cg01460436	20	44687454	F	SLC12A5	3'UTR	0.176788	0.0130158	5.08164e-42	0.12527	0.0135307	2.07848e-20
cg26557693	7	27265159	R			0.201371	0.0148292	5.30775e-42	0.218142	0.0150411	1.15767e-47
cg04532200	X	153033893	R	PLXNB3	Body	-0.251948	0.0185538	5.31051e-42	-0.208432	0.0191858	1.7136e-27
cg05205351	20	2634775	F	NOP56	Body	-0.242146	0.0178335	5.3987e-42	-0.232141	0.0181536	1.92354e-37
cg14312538	18	25757710	R	CDH2	TSS1500	0.216923	0.0159795	5.62747e-42	0.175758	0.0163946	8.15988e-27
cg19730691	1	119526437	F	TBX15	5'UTR	0.170605	0.0125682	5.68377e-42	0.149188	0.0128555	3.88789e-31
cg23625660	5	135266516	F	FBXL21	5'UTR	0.206771	0.0152395	6.19149e-42	0.160312	0.0158605	5.1099e-24
cg15804973	6	137114513	F	MAP3K5	TSS1500	-0.24657	0.0181732	6.21751e-42	-0.272915	0.0180125	7.40887e-52
cg05301866	2	162279964	F	TBR1	Body	0.229171	0.0168913	6.25128e-42	0.148844	0.0172269	5.60965e-18
cg05768922	11	124791389	R	HEPACAM	Body	0.213892	0.0157671	6.39446e-42	0.177309	0.0164241	3.60881e-27
cg04022063	15	30114295	F	TJP1	5'UTR	0.219691	0.0161984	6.67761e-42	0.190707	0.0163746	2.39078e-31
cg12075720	19	17799037	R	UNC13A	TSS200	0.221351	0.0163213	6.72101e-42	0.156229	0.0167608	1.15174e-20
cg13458211	1	44444217	F	B4GALT2	TSS1500	-0.22707	0.016746	6.94259e-42	-0.173814	0.0170241	1.7906e-24
cg23368715	12	7245510	R	C1R	TSS1500	-0.228314	0.0168389	7.03743e-42	-0.225658	0.0167297	1.82921e-41
cg15912800	7	27209197	R	MIR196B	TSS200	0.193869	0.0142986	7.04888e-42	0.142231	0.014416	5.83621e-23
cg22402467	12	7168056	R	C1S	1stExon	-0.238483	0.0175898	7.10126e-42	-0.189397	0.0188682	1.03862e-23
cg13657200	9	117266029	R	DFNB31	Body	-0.17892	0.0132004	7.49486e-42	-0.18966	0.0127241	3.03031e-50
cg02488942	2	105480687	R			0.192374	0.0141941	7.59801e-42	0.153206	0.0146834	1.73551e-25
cg03147185	2	97008030	F	NCAPH	Body	-0.171693	0.0126704	7.84412e-42	-0.165892	0.0130328	4.09126e-37
cg15452970	1	91190620	F			0.178488	0.0131733	8.01539e-42	0.16042	0.0136057	4.36529e-32
cg20751926	16	58061280	F	MMP15	Body	0.214998	0.0158699	8.19478e-42	0.207036	0.0164568	2.70064e-36
cg15174623	7	35494345	F			0.196592	0.0145118	8.2465e-42	0.154133	0.014559	3.43207e-26
cg10961604	1	27709771	R	CD164L2	1stExon	0.201594	0.0148825	8.39783e-42	0.174472	0.0153513	6.22581e-30
cg03320827	6	10887367	F	SYCP2L	1stExon	0.210269	0.0155232	8.42661e-42	0.170361	0.0159508	1.25706e-26
cg04169021	17	35060451	F			0.222244	0.0164077	8.47167e-42	0.183749	0.016067	2.74883e-30
cg18715243	8	37658755	R	GPR124	Body	-0.24551	0.0181258	8.51165e-42	-0.202447	0.0189466	1.19454e-26
cg03607115	4	106816844	R	NPNT	1stExon	0.201904	0.0149066	8.52949e-42	0.186533	0.0155071	2.50601e-33
cg17183905	12	110253842	R	TRPV4	5'UTR	-0.230116	0.0169932	8.87099e-42	-0.233906	0.0173676	2.41472e-41
cg07408835	5	140306377	F	PCDHAC1	1stExon	0.204508	0.0151037	9.04765e-42	0.179822	0.0153181	8.0264e-32
cg08214995	16	22826243	F	HS3ST2	1stExon	0.219008	0.0161752	9.10997e-42	0.148114	0.0166025	4.6137e-19
cg15557036	17	48041891	R			0.235237	0.0173757	9.29502e-42	0.238161	0.0179552	3.73445e-40
cg07274618	17	74070698	R	GALR2	TSS200	0.181322	0.0133934	9.30551e-42	0.136126	0.0141187	5.33788e-22
cg05817709	11	63304098	F	RARRES3	TSS200	-0.206289	0.0152382	9.37391e-42	-0.193055	0.0162064	1.02141e-32
cg02729030	7	110879415	R	IMMP2L	Body	-0.18335	0.0135443	9.44565e-42	-0.155933	0.0139894	7.44417e-29
cg04500377	8	38090208	F	DDHD2	5'UTR	-0.207674	0.0153419	9.53833e-42	-0.181991	0.016452	1.91813e-28
cg15030849	19	55866094	R	COX6B2	5'UTR	0.209144	0.015452	9.71611e-42	0.163935	0.0156425	1.06646e-25
cg21784383	1	217311172	F	ESRRG	TSS200	0.204495	0.0151088	9.73953e-42	0.166089	0.0154206	4.7396e-27
cg23320649	3	50604613	F	C3orf18	5'UTR	-0.201785	0.0149144	1.04758e-41	-0.217037	0.0155192	1.92336e-44
cg17555373	13	53775108	R			0.19088	0.0141091	1.05633e-41	0.143564	0.0141743	4.13096e-24
cg12988534	7	51384371	F	COBL	1stExon	0.225723	0.0166904	1.12643e-41	0.171296	0.0173104	4.35046e-23
cg20286236	17	29886672	R	MIR193A	TSS1500	0.224146	0.0165749	1.14134e-41	0.181291	0.0174813	3.37533e-25
cg05575054	10	115804968	F	ADRB1	1stExon	0.234281	0.0173266	1.16866e-41	0.198349	0.0178456	1.06349e-28
cg02900766	15	58357319	R	ALDH1A2	Body	0.232001	0.0171596	1.18958e-41	0.208923	0.0177702	6.50557e-32
cg20303331	17	36945575	R	PIP4K2B	Body	-0.230369	0.0170456	1.27714e-41	-0.221289	0.018173	4.13045e-34
cg00247557	18	5197071	R	LOC642597	1stExon	0.201992	0.0149532	1.3977e-41	0.142387	0.0150979	4.06532e-21
cg01743901	19	12936741	F	RTBDN	Body	0.17611	0.0130387	1.42859e-41	0.158402	0.0135421	1.32036e-31
cg22557662	19	38747374	R	PPP1R14A	TSS1500	0.219132	0.0162244	1.43528e-41	0.178144	0.0164559	2.60596e-27
cg04427498	7	20830657	R			0.221024	0.0163697	1.52151e-41	0.243565	0.0165458	4.75064e-49
cg04080625	1	15426634	F	KIAA1026	Body	-0.245703	0.0181989	1.54356e-41	-0.256641	0.0183653	2.23926e-44
cg13039251	5	32018601	R	PDZD2	Body	-0.22831	0.0169111	1.55082e-41	-0.246574	0.0176975	4.00644e-44
cg19505546	5	139017263	F			0.229935	0.0170343	1.59888e-41	0.201652	0.017831	1.18378e-29
cg14231297	19	58629901	F	ZSCAN18	TSS200	0.192667	0.0142754	1.64084e-41	0.152692	0.0144077	3.04655e-26
cg23588217	1	119530048	R	TBX15	5'UTR	0.212297	0.0157341	1.72475e-41	0.187928	0.0155361	1.1061e-33
cg03325733	6	146864759	F	RAB32	TSS200	0.206359	0.015295	1.74479e-41	0.149856	0.0159835	6.87407e-21
cg06822816	8	120220882	R	MAL2	Body	0.20593	0.0152648	1.77898e-41	0.162728	0.0155171	9.91382e-26
cg19578183	2	128991530	F			-0.247056	0.0183149	1.80815e-41	-0.271209	0.0172252	7.44366e-56
cg04115680	7	75889229	R	SRRM3	Body	0.214685	0.0159163	1.83033e-41	0.155511	0.0162307	9.58417e-22
cg22273555	6	33130034	F			-0.209437	0.0155279	1.84566e-41	-0.206854	0.0161557	1.56209e-37
cg22305167	6	29521420	F			0.217403	0.0161187	1.85133e-41	0.159397	0.0166642	1.11963e-21
cg01022345	14	101317819	F	MIR770	TSS1500	-0.245806	0.0182248	1.8549e-41	-0.226955	0.018748	9.86959e-34
cg01158822	6	10415201	F	TFAP2A	Body	0.214429	0.0158998	1.88253e-41	0.132614	0.0158029	4.79113e-17
cg09884851	12	79809356	R	SYT1	Body	-0.250472	0.0185749	1.93117e-41	-0.250295	0.0192969	1.7928e-38
cg02928699	11	88241946	R	GRM5	Body	0.195551	0.0145055	2.01864e-41	0.167941	0.0148957	1.75511e-29
cg26669806	19	18899483	R	COMP	Body	0.209387	0.0155349	2.09276e-41	0.179881	0.0165713	1.88835e-27
cg05406635	14	100069666	R	CCDC85C	1stExon	0.182092	0.0135118	2.14963e-41	0.168238	0.014051	4.90038e-33
cg24604013	13	112721325	F	SOX1	TSS1500	0.1961	0.0145522	2.17776e-41	0.14177	0.014484	1.26749e-22
cg12995800	5	151304312	F	GLRA1	1stExon	0.199902	0.01484	2.33419e-41	0.146434	0.0153379	1.33292e-21
cg16780603	2	169659047	R	NOSTRIN	5'UTR	-0.243279	0.0180665	2.48854e-41	-0.211334	0.0189824	8.64822e-29
cg08540945	7	152591698	F			0.234294	0.0174001	2.51145e-41	0.185701	0.0179927	5.66752e-25
cg23200020	19	35068555	R	LOC643719	Body	0.21535	0.0159935	2.51991e-41	0.174829	0.0161658	2.93058e-27
cg03359540	6	2750213	R	MYLK4	5'UTR	-0.193865	0.0143984	2.53402e-41	-0.212235	0.0151889	2.27828e-44
cg26931862	12	54349169	F	HOXC12	1stExon	0.194962	0.0144819	2.60052e-41	0.159519	0.0144124	1.78927e-28
cg19161124	7	153583563	F	DPP6	TSS1500	0.184416	0.0136987	2.60561e-41	0.154203	0.0139435	1.97908e-28
cg27094244	11	61335269	F	SYT7	Body	0.20482	0.015215	2.62692e-41	0.169224	0.0160163	4.29718e-26
cg13826452	6	26758395	F			0.20082	0.01492	2.69448e-41	0.177346	0.0151161	8.71455e-32
cg17437939	7	97361252	R	TAC1	TSS200	0.217057	0.0161324	2.88776e-41	0.20268	0.0165683	2.07088e-34
cg19759064	7	56160687	F	PHKG1	1stExon	-0.224427	0.0166812	2.91979e-41	-0.184776	0.0172096	6.83841e-27
cg21200656	20	21378072	R	NKX2-4	TSS200	0.218177	0.0162181	2.968e-41	0.217512	0.0163391	1.96167e-40
cg19351628	12	58246612	R			0.180566	0.0134305	3.31602e-41	0.120643	0.0148952	5.52228e-16
cg03422911	1	237205295	R	RYR2	TSS1500	0.218162	0.0162276	3.34534e-41	0.201549	0.0162346	2.17371e-35
cg05733135	11	27740876	F	BDNF	Body	0.181752	0.0135225	3.48988e-41	0.186098	0.014161	1.90219e-39
cg01410359	2	38302230	F	CYP1B1	Body	0.228224	0.0169818	3.55681e-41	0.208157	0.0178647	2.2451e-31
cg15110296	12	12509705	R	LOH12CR1	TSS1500	-0.224128	0.016678	3.59645e-41	-0.235807	0.0165503	4.62106e-46
cg04873577	7	121006948	F	FAM3C	Body	-0.249992	0.0186078	3.78266e-41	-0.265484	0.0179081	1.01276e-49
cg15060599	3	13974467	R			0.204902	0.0152517	3.78711e-41	0.200869	0.0155183	2.54008e-38
cg11871421	17	6679476	R	FBXO39	TSS200	0.198863	0.014804	3.8686e-41	0.16246	0.0149455	1.5985e-27
cg15730857	7	116592968	R	ST7OT4	TSS1500	-0.19273	0.0143476	3.87871e-41	-0.172751	0.0155046	7.84349e-29
cg13135455	2	241860318	R			-0.197804	0.0147278	4.00213e-41	-0.185724	0.0142754	1.07321e-38
cg01282174	11	119630144	F			-0.225593	0.0167979	4.04477e-41	-0.199721	0.0167051	6.06437e-33
cg08231493	8	17271093	F	MTMR7	TSS200	0.191193	0.0142365	4.04788e-41	0.140422	0.0145166	3.91974e-22
cg06808751	8	54163693	R	OPRK1	5'UTR	0.193789	0.0144299	4.05237e-41	0.161684	0.0149759	3.58483e-27
cg12877723	8	57358312	F	PENK	Body	0.199827	0.0148824	4.19701e-41	0.187615	0.0150978	1.87331e-35
cg04467618	6	134210946	F	TCF21	1stExon	0.215594	0.0160568	4.20241e-41	0.176906	0.0163518	2.80402e-27
cg09636661	16	69743901	F	NQO1	3'UTR	-0.236473	0.0176123	4.22528e-41	-0.259816	0.0185323	1.18246e-44
cg11750165	13	112722233	R	SOX1	1stExon	0.218632	0.0162867	4.3789e-41	0.156792	0.0168904	1.64924e-20
cg03705912	5	16179210	R	2011-03-01	1stExon	0.179441	0.0133714	4.63399e-41	0.17157	0.0139437	8.56527e-35
cg18556676	12	22095111	F			0.18645	0.0138955	4.74084e-41	0.148941	0.0141151	4.97755e-26
cg11998703	19	58446669	R	ZNF418	1stExon	0.208534	0.0155422	4.79068e-41	0.130438	0.0160252	3.96766e-16
cg00396667	5	134364387	R	PITX1	3'UTR	0.211664	0.0157782	4.94479e-41	0.18249	0.0163173	4.89474e-29
cg26333652	5	2750758	R	IRX2	Body	0.195756	0.0145959	5.1608e-41	0.155717	0.0146513	2.20289e-26
cg13959344	6	32901642	F			-0.247976	0.0184961	5.50604e-41	-0.243331	0.0189177	7.30791e-38
cg15449956	8	106331995	R	ZFPM2	Body	0.176292	0.0131506	5.60601e-41	0.105371	0.013303	2.35879e-15
cg04398950	14	103395423	R	AMN	Body	0.225708	0.0168375	5.64597e-41	0.211589	0.0169423	8.59238e-36
cg16949120	10	134599783	F	NKX6-2	TSS1500	0.200512	0.0149587	5.7026e-41	0.158728	0.0152999	3.24047e-25
cg05721773	1	207083336	R	FAIM3	Body	-0.140512	0.0104839	5.83401e-41	-0.149893	0.0112449	1.5513e-40
cg00511674	16	78080068	R			0.217714	0.0162445	5.85737e-41	0.17726	0.0167936	4.8065e-26
cg23521835	6	125283969	F	STL	Body	0.191168	0.0142657	5.99987e-41	0.136054	0.0144972	6.30053e-21
cg02657401	19	22469223	F			0.189869	0.0141692	6.03362e-41	0.167654	0.0139933	4.46576e-33
cg01688688	5	140614000	F	PCDHB18	Body	0.24047	0.0179542	6.59469e-41	0.209561	0.0177398	3.34236e-32
cg09838285	19	11805721	R			0.200262	0.0149547	6.80546e-41	0.173224	0.0155433	7.61051e-29
cg27578811	15	83316223	R	CPEB1	Body	0.231004	0.0172512	6.86582e-41	0.190697	0.0178695	1.3823e-26
cg00740914	2	66652111	R			-0.24125	0.0180164	6.86812e-41	-0.209936	0.018427	4.53995e-30
cg00204501	15	30114651	F	TJP1	5'UTR	0.206487	0.0154213	6.93882e-41	0.186848	0.0159948	1.5791e-31
cg02646491	11	2890710	R	KCNQ1DN	TSS1500	0.230766	0.0172374	7.15315e-41	0.167201	0.018161	3.36592e-20
cg10298052	10	57391055	R			0.184593	0.0137907	7.37265e-41	0.140633	0.0140098	1.03521e-23
cg21270860	1	38513318	R	POU3F1	TSS1500	0.216159	0.0161511	7.54637e-41	0.191414	0.0172658	1.46235e-28
cg01690182	15	27018874	R	GABRB3	5'UTR	0.20631	0.0154173	7.7361e-41	0.144434	0.0160153	1.90637e-19
cg25218716	20	22565228	R	FOXA2	5'UTR	0.192467	0.0143835	7.797e-41	0.160421	0.0145139	2.12257e-28
cg01345315	12	43945998	F	ADAMTS20	TSS1500	0.188895	0.0141171	7.84887e-41	0.137558	0.0147155	8.94333e-21
cg02281208	15	27216008	R	GABRG3	TSS1500	0.201711	0.0150761	7.97182e-41	0.15441	0.0150394	9.92248e-25
cg04865692	19	50831762	F	KCNC3	1stExon	0.232153	0.0173578	8.51794e-41	0.186954	0.0178918	1.47869e-25
cg10023530	18	11148783	F	FAM38B	TSS200	0.198004	0.0148082	8.90658e-41	0.179946	0.0147604	3.46629e-34
cg04374393	3	137483503	R	SOX14	TSS200	0.14477	0.0108286	9.14159e-41	0.107441	0.0108439	3.84233e-23
cg18516557	2	177004015	R			0.192353	0.0143938	9.86426e-41	0.152085	0.0150179	4.19681e-24
cg02360199	14	103674159	R			0.212696	0.0159195	1.02607e-40	0.189454	0.0162618	2.28747e-31
cg04876835	1	57111099	R	PRKAA2	1stExon	0.208611	0.0156154	1.04578e-40	0.161086	0.0163422	6.3914e-23
cg27504802	1	231298651	F	TRIM67	TSS200	0.213679	0.0159961	1.06143e-40	0.159543	0.0164738	3.50471e-22
cg05209584	5	127873283	R	FBN2	1stExon	0.196264	0.0146938	1.0793e-40	0.165399	0.0148606	8.96274e-29
cg24535475	12	7167900	F	C1S	TSS200	-0.247794	0.0185561	1.12589e-40	-0.229877	0.0190824	2.02365e-33
cg17879376	1	32212024	R	BAI2	Body	-0.140718	0.0105418	1.2084e-40	-0.15973	0.0116371	7.09791e-43
cg10401879	10	83634276	R	NRG3	TSS1500	0.195054	0.0146127	1.21281e-40	0.148174	0.0150644	7.87635e-23
cg20359994	6	27599141	F			0.225426	0.016889	1.22455e-40	0.204575	0.0170725	4.37707e-33
cg24217948	18	42261980	R	SETBP1	5'UTR	-0.225087	0.0168663	1.26056e-40	-0.259343	0.0162188	1.49436e-57
cg16969368	17	57642752	R	DHX40	TSS200	0.233231	0.0174784	1.28509e-40	0.237117	0.0175017	8.1166e-42
cg16313758	7	2647039	F	IQCE	Body	-0.186622	0.013988	1.32547e-40	-0.150264	0.0145075	3.86088e-25
cg03031959	9	85677921	R	RASEF	1stExon	0.206173	0.0154542	1.33834e-40	0.170976	0.0156037	6.12169e-28
cg02973171	11	82443614	R	FAM181B	1stExon	0.219771	0.0164753	1.36579e-40	0.227086	0.0167814	1.01237e-41
cg03519967	1	26010346	F	MAN1C1	Body	-0.244741	0.0183516	1.42452e-40	-0.240519	0.0189512	6.59279e-37
cg09388605	8	56013800	F	XKR4	TSS1500	0.213748	0.0160281	1.43333e-40	0.143715	0.0164203	2.09114e-18
cg04738965	3	147127662	R	ZIC1	1stExon	0.193141	0.0144865	1.49748e-40	0.171012	0.0148939	1.62426e-30
cg26422458	1	79472452	F	ELTD1	5'UTR	0.183705	0.0137795	1.51257e-40	0.15516	0.0137441	1.48361e-29
cg17522207	19	45655646	F	NKPD1	Body	0.218505	0.0163901	1.51733e-40	0.1492	0.0172655	5.54714e-18
cg05655457	11	58127944	F	OR5B17	TSS1500	-0.255258	0.0191469	1.51738e-40	-0.254536	0.0196572	2.38942e-38
cg25439496	6	85484627	F			0.187201	0.0140439	1.55545e-40	0.158267	0.0144269	5.30788e-28
cg24673101	14	100069840	F	CCDC85C	1stExon	0.21837	0.0163825	1.56e-40	0.198592	0.0167247	1.61249e-32
cg26763486	10	124013672	R	TACC2	3'UTR	-0.196982	0.0147779	1.56012e-40	-0.185387	0.0149092	1.70034e-35
cg02561482	6	50813551	R	TFAP2B	3'UTR	0.194196	0.0145737	1.65336e-40	0.146761	0.0151139	2.72591e-22
cg01552919	4	901847	R	GAK	Body	-0.223877	0.0168036	1.69773e-40	-0.224174	0.0175269	1.85754e-37
cg20664247	1	2345475	R	PEX10	TSS1500	-0.227541	0.0170815	1.75089e-40	-0.227512	0.017018	9.19159e-41
cg11747183	7	149918226	R			0.167659	0.0125891	1.82533e-40	0.125328	0.0125769	2.17081e-23
cg16001722	6	127836159	R	C6orf174	Body	0.21643	0.0162521	1.84233e-40	0.210204	0.0165583	6.31839e-37
cg17885226	6	105388731	F			0.226225	0.016989	1.86849e-40	0.244901	0.0170904	1.42599e-46
cg13807549	9	116444721	R			-0.208018	0.0156235	1.90813e-40	-0.229648	0.0163851	1.251e-44
cg19612068	6	33130024	F			-0.209136	0.0157085	1.93214e-40	-0.208435	0.016456	9.10365e-37
cg12462816	6	127836107	R	C6orf174	Body	0.220319	0.0165499	1.9595e-40	0.190725	0.0171439	9.48246e-29
cg13413955	9	842914	F	DMRT1	Body	0.206166	0.0154873	1.97378e-40	0.147115	0.016297	1.76267e-19
cg06719900	11	109292894	F	C11orf87	5'UTR	0.175451	0.0131809	1.99652e-40	0.173338	0.013403	2.93946e-38
cg15138614	11	1858467	R	SYT8	Body	-0.244214	0.0183574	2.21372e-40	-0.194242	0.0190329	1.87111e-24
cg19162158	8	32405427	R	NRG1	TSS1500	0.206535	0.0155265	2.2509e-40	0.12683	0.01599	2.15868e-15
cg00554413	1	59042113	F	TACSTD2	1stExon	0.212503	0.0159781	2.32602e-40	0.197175	0.0159658	4.88038e-35
cg24109612	6	19838817	R	ID4	Body	0.207655	0.0156138	2.33021e-40	0.17918	0.0159805	3.54528e-29
cg00745389	7	32467435	R			0.216877	0.0163075	2.33785e-40	0.211206	0.016412	6.72549e-38
cg17573292	4	24801801	R	SOD3	Body	0.214767	0.0161501	2.37232e-40	0.152198	0.0168222	1.46341e-19
cg21524899	1	225662606	R			-0.237263	0.0178439	2.42206e-40	-0.225271	0.0178157	1.19976e-36
cg24881205	7	20826188	R	SP8	5'UTR	0.181165	0.0136275	2.5058e-40	0.141976	0.0138041	8.22742e-25
cg23290344	8	24771466	F	NEFM	TSS1500	0.211396	0.0159028	2.54175e-40	0.154255	0.0165803	1.35923e-20
cg11931116	10	54074040	F	DKK1	5'UTR	0.172788	0.0130004	2.61429e-40	0.114926	0.0136434	3.65169e-17
cg02243785	1	82267931	F	LPHN2	5'UTR	0.198813	0.0149615	2.70474e-40	0.150674	0.0157409	1.04744e-21
cg03986829	3	62358234	F	FEZF2	Body	0.201388	0.0151566	2.74864e-40	0.137387	0.0162628	2.96431e-17
cg08456051	4	190225902	R			-0.253209	0.0190605	2.84903e-40	-0.227024	0.0197961	1.90701e-30
cg01256539	5	119802022	F	PRR16	5'UTR	-0.242202	0.0182328	2.87271e-40	-0.187408	0.0188268	2.41448e-23
cg02487453	22	31198724	R	OSBP2	Body	0.197554	0.014873	2.91745e-40	0.180587	0.0147795	2.46701e-34
cg17445145	4	330290	R	ZNF141	TSS1500	0.192614	0.0145022	2.95587e-40	0.164839	0.0148688	1.46351e-28
cg13272546	17	27313239	R	SEZ6	Body	0.186644	0.0140564	3.09612e-40	0.169886	0.0151885	4.82224e-29
cg20019985	11	32008961	F			0.207524	0.015633	3.24226e-40	0.145823	0.0157597	2.18524e-20
cg17694795	8	67874366	R			0.213339	0.016071	3.24363e-40	0.203742	0.0164166	2.28571e-35
cg06577205	5	15500714	R	FBXL7	5'UTR	0.195836	0.0147525	3.24378e-40	0.146453	0.0150906	2.87262e-22
cg02036261	14	57276057	R	OTX2	5'UTR	0.208233	0.0156882	3.31082e-40	0.15353	0.0157716	2.14642e-22
cg19619405	12	43945892	F	ADAMTS20	TSS200	0.192789	0.0145255	3.34151e-40	0.172518	0.0148566	3.57253e-31
cg10966580	4	6223973	R			0.201497	0.0151829	3.39644e-40	0.172775	0.0159894	3.23725e-27
cg03013070	10	95965579	R	PLCE1	Body	-0.219357	0.0165301	3.45089e-40	-0.191753	0.0177558	3.46406e-27
cg23085662	18	59000860	F			0.177262	0.0133585	3.47338e-40	0.154741	0.0138291	4.59009e-29
cg16703956	5	1446217	F	SLC6A3	TSS1500	0.201965	0.0152218	3.54374e-40	0.160128	0.0156519	1.44641e-24
cg18952796	7	98246633	R	NPTX2	5'UTR	0.216599	0.0163271	3.63495e-40	0.189884	0.0166595	4.28254e-30
cg10766475	6	146864781	F	RAB32	TSS200	0.219614	0.0165548	3.65069e-40	0.158409	0.0172864	5.01142e-20
cg03915012	4	902074	F	GAK	Body	-0.232167	0.0175011	3.65181e-40	-0.225271	0.0180752	1.18837e-35
cg00255368	1	217310887	R	ESRRG	5'UTR	0.191695	0.0144513	3.69906e-40	0.135193	0.0150077	2.09363e-19
cg07892422	12	54333323	F	HOXC13	1stExon	0.196061	0.0147811	3.72658e-40	0.135046	0.0150028	2.22971e-19
cg14583999	3	10019040	R	TMEM111	Body	-0.153407	0.0115654	3.72768e-40	-0.150822	0.0118342	3.34051e-37
cg20067719	17	48623772	F	SPATA20	TSS1500	-0.246086	0.0185547	3.80813e-40	-0.253704	0.0188628	3.08223e-41
cg12161228	11	89224506	R	NOX4	1stExon	0.186403	0.0140551	3.82883e-40	0.132151	0.0145395	9.9898e-20
cg26578682	5	2750163	R	IRX2	Body	0.197153	0.0148694	4.00264e-40	0.187837	0.0152691	8.85701e-35
cg02816816	4	17783356	F	FAM184B	TSS1500	0.195041	0.0147102	4.00565e-40	0.135946	0.0150935	2.11933e-19
cg03431846	14	24641183	R	REC8	TSS200	0.214368	0.0161694	4.07744e-40	0.158732	0.0170147	1.06754e-20
cg09077934	15	29407792	F	APBA2	Body	0.18111	0.0136638	4.23348e-40	0.148363	0.0141193	7.95007e-26
cg06783737	6	26752689	R			0.174623	0.0131781	4.45631e-40	0.150615	0.0133475	1.57133e-29
cg00664406	3	51740875	F	GRM2	TSS1500	0.223827	0.0168931	4.53725e-40	0.22362	0.0174117	9.40499e-38
cg27003782	10	125651391	R	CPXM2	1stExon	0.193151	0.0145784	4.56236e-40	0.143649	0.0150383	1.26887e-21
cg13222752	14	74892569	F	TMEM90A	5'UTR	0.192496	0.0145308	4.67206e-40	0.145142	0.0148882	1.86748e-22
cg02824202	18	6729810	R			0.213255	0.0160994	4.75005e-40	0.14522	0.0166134	2.30838e-18
cg12246510	11	79152102	R	ODZ4	TSS1500	0.18955	0.0143106	4.79304e-40	0.175388	0.0147158	9.49095e-33
cg26875805	1	166890429	R	ILDR2	Body	0.178652	0.0134906	4.97038e-40	0.144376	0.0140481	8.92231e-25
cg09656389	11	31839790	F	PAX6	TSS1500	0.19639	0.014831	5.03007e-40	0.156883	0.0151594	4.23372e-25
cg10005978	9	977818	F	DMRT3	Body	0.203824	0.0153952	5.19334e-40	0.179725	0.0152717	5.67306e-32
cg08534628	13	100650073	F			0.199132	0.0150433	5.34654e-40	0.147761	0.014518	2.49314e-24
cg11842415	1	75599667	F	LHX8	Body	0.214698	0.0162196	5.36868e-40	0.175667	0.0173143	3.45952e-24
cg21725716	19	1725535	R			0.206009	0.0155633	5.37941e-40	0.161026	0.0158019	2.19065e-24
cg17333109	14	37050403	F	NKX2-8	Body	0.194196	0.014671	5.3858e-40	0.162992	0.0151234	4.40118e-27
cg27658304	5	139017367	R			0.227671	0.0172008	5.43081e-40	0.176063	0.0178118	4.85382e-23
cg09688588	3	191047460	F	CCDC50	5'UTR	0.214023	0.0161706	5.48848e-40	0.204072	0.0166131	1.10668e-34
cg00688962	4	21950567	F	KCNIP4	TSS200	0.19805	0.014965	5.56761e-40	0.130206	0.0156368	8.29647e-17
cg01127300	22	38614796	F			-0.252153	0.0190541	5.61673e-40	-0.246924	0.0185662	2.32506e-40
cg16226962	6	10415687	R	TFAP2A	Body	0.181433	0.0137115	5.72306e-40	0.120756	0.0138923	3.55051e-18
cg14473924	3	73674170	F	PDZRN3	TSS200	0.191096	0.0144427	5.78438e-40	0.180218	0.0145036	1.89359e-35
cg12969644	9	85678242	R	RASEF	TSS200	0.200755	0.0151757	5.98815e-40	0.168918	0.0151503	7.20214e-29
cg12258344	2	47550528	R			-0.232403	0.0175682	5.99986e-40	-0.212378	0.0170464	1.25205e-35
cg09054633	5	136834294	R	SPOCK1	5'UTR	0.206245	0.0155918	6.06333e-40	0.150548	0.0162582	2.04766e-20
cg03894892	7	153445197	F			0.17323	0.0130962	6.08618e-40	0.131107	0.0133192	7.31295e-23
cg10943458	3	120627085	R	STXBP5L	1stExon	0.212762	0.0160852	6.11356e-40	0.185421	0.0158094	9.10503e-32
cg26144658	5	121647642	R	SNCAIP	TSS200	0.204254	0.0154487	6.60006e-40	0.151043	0.0160401	4.6585e-21
cg04896437	1	202076492	R			-0.197682	0.0149555	6.90395e-40	-0.148892	0.015267	1.79858e-22
cg06482428	4	21950173	F	KCNIP4	5'UTR	0.192275	0.014548	7.03436e-40	0.161891	0.0145806	1.21019e-28
cg07924081	19	45898892	F	PPP1R13L	Body	0.19158	0.0144984	7.29906e-40	0.173473	0.015006	6.5522e-31
cg18057109	7	156409738	F			0.196363	0.0148613	7.37874e-40	0.162996	0.0155549	1.08191e-25
cg06829788	1	228581405	F	TRIM11	3'UTR	-0.229046	0.0173383	7.6403e-40	-0.182303	0.0178783	2.04678e-24
cg26748477	17	38516415	F			-0.206709	0.0156486	7.73987e-40	-0.181508	0.015746	9.61694e-31
cg23896164	21	38120518	R	SIM2	3'UTR	0.199487	0.0151046	7.99383e-40	0.158335	0.015349	5.98635e-25
cg19838043	14	104196038	R	ZFYVE21	Body	-0.180262	0.0136499	8.09127e-40	-0.167196	0.0139215	3.15176e-33
cg24945701	3	62362783	F			0.192706	0.014594	8.26904e-40	0.166837	0.0152199	5.83645e-28
cg14836018	14	51706425	R	TMX1	TSS1500	-0.22649	0.0171555	8.52654e-40	-0.246331	0.017613	1.90468e-44
cg16851425	13	110437759	F	IRS2	1stExon	0.219373	0.016618	8.66224e-40	0.145973	0.017139	1.63723e-17
cg13790576	9	139640661	R	LCN6	Body	-0.216693	0.0164173	8.88304e-40	-0.19639	0.0170711	1.25542e-30
cg19261426	1	228560439	F	OBSCN	Body	-0.233285	0.0176748	8.92427e-40	-0.236984	0.017669	5.11587e-41
cg24794228	19	52391166	F	ZNF577	Body	0.229177	0.017367	9.23718e-40	0.218517	0.0179226	3.41785e-34
cg26967100	14	61104032	R			0.186282	0.0141192	9.55586e-40	0.159568	0.014842	5.85221e-27
cg00959431	9	79638117	R			0.208947	0.0158387	9.73535e-40	0.186366	0.0161653	9.44529e-31
cg25309759	17	34068225	R	RASL10B	Body	0.213838	0.0162102	9.81108e-40	0.142727	0.0167172	1.36874e-17
cg07240873	5	140235968	R	PCDHA6	Body	0.198727	0.0150665	1.00118e-39	0.152309	0.0149243	1.87554e-24
cg25763393	19	52956832	R	ZNF578	1stExon	0.186478	0.0141378	1.00127e-39	0.170709	0.0143108	8.38849e-33
cg27376872	8	899171	F			-0.200181	0.0151789	1.02709e-39	-0.166659	0.0160475	2.89102e-25
cg06825039	7	20824905	R	SP8	Body	0.222387	0.016864	1.04108e-39	0.1447	0.0170076	1.76977e-17
cg10269548	4	53728923	R	RASL11B	Body	0.186549	0.0141497	1.08626e-39	0.156266	0.0147092	2.31264e-26
cg21657577	19	52956622	R	ZNF578	TSS1500	0.211981	0.0160789	1.08771e-39	0.226328	0.0161836	1.92329e-44
cg26921969	5	92948217	R			0.236155	0.0179158	1.1232e-39	0.222128	0.0177308	5.26018e-36
cg12943155	3	127347978	R	PODXL2	TSS200	0.230847	0.0175148	1.14179e-39	0.208348	0.0179811	4.79276e-31
cg06291867	10	92617162	F	HTR7	1stExon	0.233653	0.017728	1.14555e-39	0.194684	0.0180839	5.00077e-27
cg04517323	8	98788873	F	LAPTM4B	Body	0.186916	0.014182	1.14763e-39	0.173081	0.0145123	8.60566e-33
cg19670290	15	91477210	R	HDDC3	TSS1500	-0.225828	0.0171348	1.15142e-39	-0.240669	0.0165964	1.1899e-47
cg03817667	7	54609953	F	VSTM2A	TSS200	0.177041	0.0134349	1.17888e-39	0.176624	0.0134797	3.16739e-39
cg00741900	14	102027797	F	DIO3	5'UTR	0.195258	0.01482	1.21718e-39	0.194098	0.0151202	1.01783e-37
cg03002352	2	17699688	F	RAD51AP2	1stExon	0.210694	0.0159941	1.25175e-39	0.153356	0.0165988	2.48849e-20
cg22759823	19	57610870	F			0.203489	0.0154486	1.27136e-39	0.177384	0.0154287	1.36458e-30
cg27252164	11	2292373	R	ASCL2	TSS200	0.200757	0.0152421	1.28434e-39	0.16656	0.0152561	9.49155e-28
cg02132560	16	56666049	R	MT1M	TSS1500	0.173397	0.0131669	1.31999e-39	0.0961939	0.0138203	3.39488e-12
cg25078444	14	29235193	F	FOXG1	TSS1500	0.218352	0.0165829	1.35384e-39	0.199019	0.0172315	7.4057e-31
cg01153166	15	96874702	F	NR2F2	TSS1500	0.227881	0.0173075	1.36655e-39	0.193164	0.0173658	9.66958e-29
cg09141965	7	1269385	R			0.188775	0.0143397	1.40429e-39	0.161129	0.0145473	1.6365e-28
cg16477091	17	56833000	F	PPM1E	TSS1500	0.233801	0.0177613	1.42358e-39	0.220854	0.0183236	1.86959e-33
cg17380661	6	100912946	R	SIM1	TSS1500	0.207495	0.0157647	1.45249e-39	0.196823	0.0158442	1.97488e-35
cg13790603	3	24536478	R	THRB	TSS200	0.191773	0.0145721	1.48477e-39	0.154729	0.015423	1.09872e-23
cg16717713	14	100069657	R	CCDC85C	1stExon	0.175434	0.0133316	1.50511e-39	0.167318	0.013641	1.38168e-34
cg13829550	14	74893112	R	TMEM90A	TSS1500	0.196852	0.0149632	1.57738e-39	0.136109	0.0157242	4.88506e-18
cg24222995	7	28995786	R	TRIL	1stExon	0.202201	0.0153706	1.59043e-39	0.172737	0.0155716	1.35547e-28
cg10836392	22	44258132	R	SULT4A1	1stExon	0.197238	0.0149986	1.6929e-39	0.170714	0.0153012	6.62851e-29
cg00960552	1	116380946	F	NHLH2	Body	0.193604	0.0147237	1.72062e-39	0.154733	0.0150113	6.49916e-25
cg10149533	4	154064784	F			-0.211176	0.016062	1.75864e-39	-0.202964	0.0165746	1.77557e-34
cg02557695	7	90895083	F	FZD1	1stExon	0.19515	0.0148442	1.78011e-39	0.146348	0.0154709	3.0918e-21
cg12699286	12	54394194	F	HOXC9	1stExon	0.216399	0.0164613	1.79623e-39	0.132723	0.0167311	2.1439e-15
cg12373771	22	17601381	R	CECR6	1stExon	0.22675	0.0172502	1.82341e-39	0.195867	0.0177178	2.07786e-28
cg10366797	12	54441509	F	HOXC4	5'UTR	0.197036	0.01499	1.82858e-39	0.193042	0.0154719	9.97121e-36
cg26985711	12	91572276	R	DCN	1stExon	-0.23952	0.0182253	1.88788e-39	-0.203989	0.0191178	1.40452e-26
cg13546414	14	37053664	F			0.191218	0.0145504	1.89737e-39	0.139206	0.0147864	4.75487e-21
cg12613383	1	242688681	F	PLD5	TSS1500	0.204742	0.0155799	1.90701e-39	0.148537	0.0162607	6.55814e-20
cg27348266	14	104583972	F			0.206748	0.0157339	1.93412e-39	0.173651	0.0163774	2.88311e-26
cg21567504	15	28344477	R	OCA2	TSS200	0.211127	0.0160674	1.93908e-39	0.205295	0.0161157	3.59853e-37
cg08553327	6	31543647	F	TNF	1stExon	-0.230639	0.0175526	1.94566e-39	-0.205643	0.0183063	2.79377e-29
cg20300343	1	149719461	F			0.198969	0.0151425	1.94645e-39	0.158337	0.0155321	2.10537e-24
cg07131533	5	113697861	R	KCNN2	TSS200	0.187422	0.0142665	2.01346e-39	0.129535	0.0146219	8.07292e-19
cg10964367	8	1771973	R	ARHGEF10	TSS200	0.208794	0.0158947	2.04458e-39	0.179697	0.0159707	2.27236e-29
cg10485664	7	121946036	R	FEZF1	TSS1500	0.205236	0.0156249	2.06996e-39	0.177433	0.0160955	2.93654e-28
cg06962177	1	63785946	R			0.204739	0.0155918	2.18215e-39	0.16193	0.0160839	7.66521e-24
cg08468401	3	14303131	R			-0.239046	0.0182052	2.19724e-39	-0.292755	0.0183063	1.45216e-57
cg24868150	2	20861653	R			-0.239823	0.0182675	2.26376e-39	-0.212389	0.0181794	1.55837e-31
cg21595709	19	15344186	F	EPHX3	TSS1500	0.174587	0.0132987	2.27039e-39	0.136673	0.0134498	2.93797e-24
cg02217786	20	690693	F			0.198661	0.0151346	2.32672e-39	0.14576	0.0152824	1.45927e-21
cg19194373	20	57875703	R	EDN3	5'UTR	0.192563	0.0146726	2.40004e-39	0.147938	0.0149259	3.7105e-23
cg00699993	4	158141570	R	GRIA2	TSS200	0.187061	0.0142537	2.41066e-39	0.141809	0.0142999	3.52067e-23
cg13055199	15	75136278	R	ULK3	TSS1500	-0.247406	0.0188528	2.4303e-39	-0.233964	0.0194317	2.18164e-33
cg17603206	10	20104935	F	PLXDC2	TSS1500	0.19299	0.0147067	2.44502e-39	0.140528	0.0153155	4.49405e-20
cg13385220	1	202250453	F	LGR6	Body	-0.217105	0.0165448	2.45331e-39	-0.175563	0.0171275	1.17899e-24
cg10001186	11	94882829	F			-0.220921	0.0168377	2.50786e-39	-0.222457	0.0166352	8.73793e-41
cg07920503	13	25745406	F	FAM123A	1stExon	0.238524	0.0181807	2.54285e-39	0.232857	0.0185466	3.72164e-36
cg12172057	7	47621687	R			0.209899	0.0160005	2.58702e-39	0.184901	0.0163866	1.58018e-29
cg27425327	12	102270723	R	DRAM1	TSS1500	-0.21426	0.0163355	2.65953e-39	-0.21464	0.0167423	1.26303e-37
cg08183141	19	50706737	F	MYH14	TSS200	0.190294	0.0145088	2.67395e-39	0.17633	0.014956	4.40081e-32
cg09774917	6	10417385	R	TFAP2A	Body	0.163399	0.0124593	2.7152e-39	0.144171	0.0125711	1.89981e-30
cg11573518	7	73721031	F	CLIP2	5'UTR	-0.246392	0.0187887	2.74433e-39	-0.224682	0.0193026	2.58181e-31
cg19235307	3	129160154	F	IFT122	Body	-0.213829	0.0163075	2.79949e-39	-0.175766	0.0171092	9.30702e-25
cg14862806	17	21356311	F			0.220396	0.0168093	2.82732e-39	0.189015	0.0187066	5.29549e-24
cg13434308	12	29936486	R	TMTC1	5'UTR	0.204869	0.0156294	2.96704e-39	0.16282	0.0157839	5.99309e-25
cg21838979	2	106681945	F	C2orf40	TSS200	0.168736	0.0128739	3.01187e-39	0.133845	0.0132491	5.40175e-24
cg08441806	10	134599149	R	NKX6-2	1stExon	0.19886	0.0151752	3.11117e-39	0.1857	0.0153281	8.79475e-34
cg09438147	2	210636533	R	UNC80	TSS200	0.198504	0.0151484	3.12402e-39	0.154511	0.0151193	1.62197e-24
cg22353329	17	77814357	R	CBX4	TSS1500	0.241123	0.0184026	3.17948e-39	0.200722	0.0185144	2.19046e-27
cg15962547	1	204183337	F	GOLT1A	TSS200	0.198997	0.015189	3.23263e-39	0.182117	0.0149964	6.16762e-34
cg13606569	9	113341525	F	SVEP1	1stExon	0.20552	0.0156872	3.24554e-39	0.175983	0.0161156	9.2434e-28
cg24150153	1	94703463	R	ARHGAP29	TSS200	0.196258	0.0149808	3.26243e-39	0.177154	0.0145255	3.2615e-34
cg12744820	6	137814960	R	OLIG3	1stExon	0.206187	0.0157406	3.33577e-39	0.163848	0.0155939	8.00131e-26
cg02964724	11	2292361	R	ASCL2	TSS200	0.210167	0.0160451	3.35858e-39	0.170043	0.016096	4.36042e-26
cg05836951	8	77594834	F	ZFHX4	5'UTR	0.200903	0.0153389	3.39979e-39	0.156737	0.0159079	6.66525e-23
cg23037611	5	113697946	R	KCNN2	TSS200	0.176618	0.013486	3.4525e-39	0.138862	0.0140665	5.51601e-23
cg12667125	1	36181447	R	C1orf216	Body	-0.234203	0.0178837	3.47427e-39	-0.195419	0.0184662	3.59263e-26
cg11412248	15	78930962	R	CHRNB4	Body	-0.221285	0.0168981	3.50525e-39	-0.224583	0.0168569	1.70284e-40
cg02046143	11	133797911	F	IGSF9B	Body	-0.226057	0.0172626	3.50851e-39	-0.230635	0.0171284	2.51204e-41
cg00757070	11	118827082	F	UPK2	1stExon	-0.24601	0.0187919	3.69247e-39	-0.166709	0.0195393	1.43847e-17
cg00664416	1	38261192	R	MANEAL	Body	0.160044	0.0122294	3.91714e-39	0.129866	0.011343	2.37916e-30
cg09748749	7	65540429	F	ASL	TSS1500	-0.243702	0.0186242	3.99775e-39	-0.263698	0.0193756	3.50072e-42
cg04567445	1	65730409	R	DNAJC6	TSS200	0.164787	0.0125949	4.08527e-39	0.127393	0.0128845	4.7263e-23
cg16919569	4	174452835	F	NBLA00301	Body	0.190551	0.0145665	4.2002e-39	0.174025	0.0152288	3.05435e-30
cg06419432	17	25707535	F			-0.225058	0.0172045	4.20804e-39	-0.213742	0.0174916	2.43991e-34
cg11846112	1	227729906	F			0.188682	0.0144239	4.21859e-39	0.155455	0.0149319	2.21038e-25
cg21694941	8	57358590	F	PENK	5'UTR	0.192	0.0146786	4.27072e-39	0.172344	0.015087	3.19689e-30
cg19654195	20	24450361	F	TMEM90B	5'UTR	0.211003	0.0161319	4.29129e-39	0.182408	0.0165019	2.10262e-28
cg26056703	15	95870321	F			0.189413	0.0144832	4.39274e-39	0.169511	0.0145585	2.47745e-31
cg15393702	18	21243529	F	ANKRD29	TSS1500	-0.204429	0.0156347	4.55566e-39	-0.21975	0.0165348	2.64178e-40
cg12894649	20	11871396	R	BTBD3	TSS200	0.177066	0.0135422	4.56787e-39	0.127704	0.0135527	4.39391e-21
cg08231710	1	1566687	F	MMP23A	TSS1500	0.246498	0.0188543	4.64694e-39	0.250178	0.0184207	5.16828e-42
cg26808747	10	128077376	R	ADAM12	TSS1500	0.205479	0.0157172	4.66609e-39	0.134595	0.0162396	1.15097e-16
cg12513880	12	115136298	R			0.187882	0.0143724	4.7327e-39	0.156544	0.0147755	3.14876e-26
cg05789711	16	23724428	R	ERN2	1stExon	0.191321	0.0146358	4.75212e-39	0.12875	0.0150503	1.18279e-17
cg07164639	6	110736958	F	DDO	TSS1500	-0.201967	0.0154503	4.7599e-39	-0.192325	0.0153672	6.15514e-36
cg19099050	3	9594382	R	LHFPL4	5'UTR	0.19701	0.0150718	4.79538e-39	0.179223	0.015543	9.22999e-31
cg07622493	8	93114294	R			0.184096	0.0140845	4.838e-39	0.152024	0.0143352	2.82658e-26
cg06391468	17	70117530	F	SOX9	5'UTR	0.192244	0.0147089	4.89082e-39	0.162494	0.0148219	5.7503e-28
cg23149300	10	36958940	F			-0.218126	0.0166896	4.91119e-39	-0.235156	0.0168894	4.57255e-44
cg15653173	13	112723034	R	SOX1	1stExon	0.206792	0.0158237	4.97963e-39	0.156848	0.016599	3.41407e-21
cg24497732	7	42278077	R	GLI3	TSS1500	0.223828	0.0171333	5.29234e-39	0.181017	0.0182118	2.80103e-23
cg25557835	8	17354715	F	SLC7A2	1stExon	0.203974	0.0156151	5.38104e-39	0.156948	0.0159046	5.72542e-23
cg10380328	4	188953126	R			0.183362	0.0140376	5.41079e-39	0.143881	0.0143067	8.56529e-24
cg08301612	17	43228571	F	HEXIM1	1stExon	-0.224084	0.0171552	5.41889e-39	-0.197018	0.0176858	8.02413e-29
cg01898698	2	105472759	R	POU3F3	1stExon	0.207708	0.0159019	5.43941e-39	0.168622	0.0162663	3.52715e-25
cg20585530	14	60975912	F	SIX6	TSS200	0.204185	0.0156365	5.70395e-39	0.146664	0.0158859	2.64767e-20
cg01910639	1	153507779	R	S100A6	Body	-0.214139	0.0163999	5.77373e-39	-0.212771	0.0168494	1.4843e-36
cg16142855	4	379900	R			0.212724	0.016292	5.7991e-39	0.165053	0.0166997	4.90348e-23
cg15439862	18	28622593	R	DSC3	1stExon	0.175099	0.013412	5.92159e-39	0.130857	0.0134326	1.99962e-22
cg03530962	3	58475833	R			-0.234965	0.0179981	5.95263e-39	-0.219267	0.0184902	1.94254e-32
cg21064451	22	38071534	R	LGALS1	TSS200	-0.225309	0.0172593	6.00108e-39	-0.171504	0.0181367	3.19367e-21
cg04402007	8	35093901	F	UNC5D	Body	0.182627	0.0139933	6.26901e-39	0.161028	0.0139861	1.12889e-30
cg20049415	20	21377671	F	NKX2-4	1stExon	0.227048	0.0173994	6.42063e-39	0.185194	0.0174567	2.71222e-26
cg03018796	22	37730664	R			0.206682	0.0158416	6.6277e-39	0.147964	0.0162476	8.48292e-20
cg06724588	16	51185459	R	SALL1	TSS1500	0.186566	0.0143081	7.32372e-39	0.143074	0.0145023	5.86901e-23
cg04894619	3	179754615	R	PEX5L	TSS200	0.220617	0.0169208	7.41475e-39	0.185908	0.0171786	2.70535e-27
cg21617516	1	223936838	F	CAPN2	Body	0.194861	0.0149485	7.68735e-39	0.137174	0.0153699	4.46295e-19
cg12475507	1	3567852	R	TP73	TSS1500	0.188028	0.0144249	7.74141e-39	0.155339	0.0149078	2.01048e-25
cg14507845	9	137418069	R			-0.212015	0.0162652	7.75256e-39	-0.210495	0.0157958	1.63483e-40
cg03606215	4	22517623	R	GPR125	1stExon	0.200074	0.0153497	7.79797e-39	0.147383	0.0160857	5.0765e-20
cg03485669	8	13016635	R	DLC1	Body	-0.216135	0.0165874	8.25308e-39	-0.215913	0.0163255	6.25215e-40
cg07065111	2	5831213	R			0.166479	0.0127777	8.37714e-39	0.133109	0.0129558	9.22256e-25
cg27166177	22	49498376	F			-0.215672	0.0165549	8.51121e-39	-0.182942	0.0167856	1.16839e-27
cg14731462	10	129789429	F	PTPRE	5'UTR	-0.246082	0.0188904	8.61169e-39	-0.218704	0.0198246	2.67909e-28
cg21200408	20	21378211	F	NKX2-4	TSS200	0.22091	0.0169586	8.65524e-39	0.201938	0.0169781	1.27084e-32
cg01554474	1	155107599	F	RAG1AP1	TSS1500	-0.237839	0.0182585	8.68202e-39	-0.217148	0.0187823	6.47417e-31
cg07127410	22	29427851	R	ZNRF3	Body	-0.20333	0.0156109	8.83415e-39	-0.148941	0.0160493	1.69114e-20
cg20426994	7	130418324	R	KLF14	1stExon	0.219989	0.0168928	9.09502e-39	0.171805	0.0175469	1.22782e-22
cg19908812	4	164253006	R	NPY1R	5'UTR	0.187939	0.0144377	9.76991e-39	0.152075	0.0146047	2.1698e-25
cg16419354	1	179713349	F	FAM163A	5'UTR	0.20421	0.01569	1.0011e-38	0.16743	0.0157775	2.62331e-26
cg10242160	4	48493350	R	ZAR1	Body	0.207518	0.0159462	1.02379e-38	0.211636	0.0164511	7.12545e-38
cg02057782	13	26042598	F	ATP8A2	Body	0.204823	0.0157393	1.02517e-38	0.166495	0.0160119	2.52669e-25
cg21306240	1	38230845	F	EPHA10	TSS200	0.201891	0.0155149	1.03551e-38	0.140345	0.0155675	1.96384e-19
cg21762820	1	166135233	F	FAM78B	Body	0.193055	0.0148378	1.05913e-38	0.166758	0.015025	1.27268e-28
cg04143876	15	76639558	R			0.186776	0.0143572	1.08429e-38	0.132748	0.0149319	6.09863e-19
cg05176991	18	24128116	F	KCTD1	5'UTR	0.215517	0.0165694	1.11728e-38	0.197428	0.0167205	3.56839e-32
cg24452260	4	158143538	R	GRIA2	Body	0.196836	0.0151338	1.1249e-38	0.153535	0.0154231	2.40184e-23
cg01185921	10	116444463	R	ABLIM1	TSS200	-0.166473	0.0128035	1.18893e-38	-0.160296	0.0137024	1.29849e-31
cg23695504	1	247275344	F	C1orf229	1stExon	0.20544	0.0158009	1.19446e-38	0.173085	0.0168843	1.16833e-24
cg10722226	1	214156203	F			0.187442	0.0144175	1.20747e-38	0.153039	0.0148521	6.74674e-25
cg14907769	8	49468941	R			0.17907	0.013774	1.21484e-38	0.133934	0.0139558	8.23204e-22
cg24632247	3	35680890	R			0.198525	0.0152708	1.21911e-38	0.153518	0.0158968	4.58358e-22
cg11194994	1	160175974	R	PEA15	5'UTR	-0.224811	0.0172932	1.22353e-38	-0.243482	0.0173462	9.29946e-45
cg02576468	19	41074006	R	SPTBN4	Body	0.196552	0.0151202	1.23425e-38	0.157278	0.0158638	3.60928e-23
cg08975803	12	52626818	F	KRT7	TSS200	0.200522	0.0154269	1.25285e-38	0.146455	0.0158639	2.65777e-20
cg08621843	2	128180488	F	PROC	Body	0.203691	0.0156727	1.27877e-38	0.17002	0.0163649	2.7738e-25
cg08251037	7	70597778	F	WBSCR17	TSS200	0.185483	0.0142716	1.27928e-38	0.175458	0.0143846	3.20085e-34
cg08993878	12	98151379	R			-0.248384	0.0191117	1.28242e-38	-0.214249	0.0196796	1.33167e-27
cg07780095	12	85674296	F	ALX1	Body	0.178711	0.0137514	1.29181e-38	0.135085	0.0141861	1.6923e-21
cg00552235	7	100943163	F			0.216032	0.0166278	1.35425e-38	0.190798	0.0164593	4.52093e-31
cg10783469	19	52391234	F	ZNF577	TSS200	0.21973	0.016916	1.4048e-38	0.199786	0.017841	4.16303e-29
cg22995692	5	141263164	F			0.208423	0.0160458	1.40861e-38	0.160834	0.0166459	4.36994e-22
cg01542019	19	14673053	R	TECR	Body	-0.236143	0.0181815	1.42972e-38	-0.248022	0.0187143	4.33149e-40
cg03944122	22	16200382	F			0.202347	0.0155805	1.44574e-38	0.215892	0.0153846	9.78984e-45
cg24869601	6	10414350	R	TFAP2A	Body	0.17628	0.0135734	1.44821e-38	0.129892	0.0139005	9.23807e-21
cg26886462	5	155108449	R			0.185071	0.014251	1.45881e-38	0.148586	0.0153946	4.82851e-22
cg15736994	4	156775941	R	ACCN5	Body	-0.228131	0.0175675	1.46965e-38	-0.24125	0.0181122	1.77809e-40
cg25942450	5	170736251	R	TLX3	TSS200	0.200028	0.0154049	1.49467e-38	0.172568	0.0150994	3.00078e-30
cg25571189	2	133427612	R	LYPD1	1stExon	0.191939	0.0147831	1.51444e-38	0.13268	0.015409	7.27206e-18
cg16644497	19	35263701	R	ZNF599	Body	0.229896	0.0177066	1.51464e-38	0.218255	0.0183686	1.46821e-32
cg04104132	11	2465440	R	KCNQ1	TSS1500	0.198731	0.0153071	1.52912e-38	0.195451	0.0160028	2.63233e-34
cg08644498	1	46502608	F			-0.236837	0.0182432	1.54377e-38	-0.243949	0.0189982	9.70715e-38
cg13372458	12	95267153	R			0.21317	0.0164218	1.5696e-38	0.171098	0.0168946	4.17598e-24
cg10751726	2	132121314	F	LOC150786	5'UTR	0.231396	0.0178267	1.58361e-38	0.221704	0.0178237	1.60994e-35
cg13464915	18	25757202	F	CDH2	1stExon	0.185571	0.0143001	1.65432e-38	0.158196	0.0142649	1.40451e-28
cg05207637	16	74134895	F			-0.236489	0.0182248	1.66842e-38	-0.241653	0.0187168	3.90229e-38
cg12315713	11	93063934	F	CCDC67	1stExon	0.198037	0.0152628	1.6935e-38	0.172304	0.0156086	2.47685e-28
cg21383487	10	22624094	R			0.200041	0.0154238	1.81899e-38	0.184538	0.0158271	2.04985e-31
cg07758738	18	12911528	F			0.161162	0.0124284	1.8779e-38	0.134105	0.013022	7.16752e-25
cg13850871	9	139583773	F			-0.225514	0.0173912	1.87843e-38	-0.195747	0.0182021	5.67121e-27
cg20279283	8	11566863	F	GATA4	Body	0.201634	0.0155498	1.88311e-38	0.145519	0.0155786	9.5492e-21
cg14186066	14	60976115	F	SIX6	1stExon	0.221108	0.0170525	1.90072e-38	0.169498	0.0174513	2.66329e-22
cg06584494	7	54614477	R	VSTM2A	Body	0.198919	0.0153417	1.91014e-38	0.152211	0.0157768	5.02321e-22
cg19078576	5	17217877	F	BASP1	5'UTR	0.199238	0.0153671	1.92589e-38	0.140726	0.0159076	9.03485e-19
cg06149302	11	134147143	F	GLB1L3	Body	0.191025	0.0147356	1.97073e-38	0.151231	0.0153054	5.03747e-23
cg03774514	20	22563702	F	FOXA2	Body	0.213712	0.0164863	1.98435e-38	0.181252	0.0167291	2.36136e-27
cg11419186	16	81477373	F	CMIP	TSS1500	-0.23431	0.0180818	2.1064e-38	-0.244015	0.0187193	7.69104e-39
cg03512426	10	131763683	F			0.165058	0.0127409	2.20207e-38	0.137	0.0132017	3.14204e-25
cg01474257	17	42030842	F	PYY	Body	0.200154	0.0154506	2.21782e-38	0.15868	0.0162584	1.67335e-22
cg10941566	22	30117148	R	CABP7	Body	0.196394	0.0151615	2.24564e-38	0.156322	0.0160423	1.95048e-22
cg22379463	3	45260330	R			-0.220903	0.0170558	2.29478e-38	-0.197849	0.0162646	4.80929e-34
cg00578032	19	38308069	R			0.199886	0.0154341	2.32159e-38	0.162132	0.0160123	4.25994e-24
cg17161718	6	33160156	R	COL11A2	5'UTR	0.194652	0.0150317	2.3676e-38	0.141529	0.0159084	5.76134e-19
cg23091758	11	9025767	R	NRIP3	TSS200	0.237596	0.0183489	2.38802e-38	0.244658	0.0183906	2.2108e-40
cg03963198	5	1882871	F	IRX4	5'UTR	0.207035	0.0159896	2.40977e-38	0.14295	0.0163689	2.47892e-18
cg04474832	3	52008487	F	ABHD14B	1stExon	-0.228412	0.0176414	2.42552e-38	-0.278901	0.0184522	1.29435e-51
cg17526229	11	20177746	R			0.177546	0.013713	2.43414e-38	0.119529	0.0137825	4.2263e-18
cg02258201	9	35906148	R	HRCT1	TSS200	-0.18332	0.0141622	2.53057e-38	-0.166758	0.0152268	6.52626e-28
cg14565725	1	119532044	R	TBX15	1stExon	0.187311	0.014471	2.54559e-38	0.129723	0.0149434	3.92473e-18
cg12530503	15	89911148	R	MIR9-3	TSS200	0.181174	0.013998	2.57882e-38	0.176826	0.0144948	3.13364e-34
cg04742397	14	95986554	F			-0.218776	0.0169042	2.60349e-38	-0.203966	0.0181448	2.5646e-29
cg21300373	4	165304540	R	2001-03-01	TSS200	0.182474	0.014101	2.659e-38	0.131889	0.0145901	1.57157e-19
cg22335876	7	121940581	F			0.186045	0.0143784	2.70453e-38	0.143511	0.0146062	8.75956e-23
cg10979567	2	238241642	R	COL6A3	Body	-0.230056	0.0177876	2.91224e-38	-0.183189	0.0191247	9.83479e-22
cg23353952	22	29876945	R	NEFH	1stExon	0.213105	0.0164811	3.03798e-38	0.16639	0.0169209	8.08335e-23
cg19077806	2	183244218	R	PDE1A	Body	-0.230464	0.0178237	3.03874e-38	-0.218783	0.0183318	7.81158e-33
cg01906015	8	63161579	R	NKAIN3	1stExon	0.194641	0.015058	3.20562e-38	0.145296	0.0158894	6.00499e-20
cg05374654	11	94134666	R	GPR83	TSS200	0.193537	0.0149729	3.2214e-38	0.177919	0.0150742	3.77151e-32
cg04172497	11	59382296	F	OSBP	Body	-0.237598	0.018382	3.22885e-38	-0.254738	0.0188168	9.35604e-42
cg20116935	3	50303757	F	SEMA3B	TSS1500	-0.165232	0.0127877	3.42028e-38	-0.173644	0.0126322	5.37183e-43
cg06723863	16	68270129	F	ESRP2	1stExon	0.21486	0.01663	3.46883e-38	0.196862	0.017355	8.00994e-30
cg03698343	9	139921892	F	ABCA2	Body	-0.202089	0.0156427	3.51524e-38	-0.195267	0.0157304	2.21094e-35
cg08185661	11	7273498	F	SYT9	1stExon	0.195671	0.0151472	3.56161e-38	0.1509	0.0156933	6.87649e-22
cg14255824	9	71795999	F	TJP2	Body	-0.213766	0.0165487	3.58843e-38	-0.173257	0.0165338	1.07919e-25
cg19360104	1	154475269	R	TDRD10	5'UTR	0.181904	0.0140823	3.59882e-38	0.14829	0.0147743	1.0484e-23
cg14951598	6	41472931	F			0.196212	0.0151919	3.67531e-38	0.166618	0.0156386	1.66618e-26
cg21858380	2	119916486	R	C1QL2	TSS200	0.205192	0.0158895	3.77132e-38	0.160703	0.0164216	1.29171e-22
cg04425624	6	31543565	R	TNF	1stExon	-0.214802	0.016634	3.77885e-38	-0.186995	0.0170533	5.60988e-28
cg26827373	19	12175935	F	ZNF844	Body	0.192196	0.0148852	3.85905e-38	0.154768	0.0153398	6.15963e-24
cg03450948	2	177053274	R	HOXD1	TSS200	0.206446	0.0159899	3.89939e-38	0.175661	0.0162945	4.26102e-27
cg02438781	19	22469533	F			0.170643	0.0132176	3.93695e-38	0.11831	0.0135514	2.53572e-18
cg14977938	14	104190829	F	ZFYVE21	Body	-0.24005	0.0185939	3.94517e-38	-0.217659	0.0191337	5.52662e-30
cg08681855	19	52957051	R	ZNF578	5'UTR	0.19344	0.0149844	3.98135e-38	0.190407	0.0150029	6.60432e-37
cg23933216	1	145059467	F	PDE4DIP	Body	-0.198257	0.0153587	4.03177e-38	-0.173781	0.0151372	1.65552e-30
cg22805381	14	51760188	R			-0.185428	0.0143659	4.08262e-38	-0.166922	0.0143506	2.84294e-31
cg15818307	6	29521430	F			0.206925	0.016032	4.11141e-38	0.148395	0.0165783	3.51688e-19
cg16800165	14	85996364	F	FLRT2	TSS200	0.180849	0.0140128	4.16328e-38	0.129262	0.0141732	7.5035e-20
cg25311666	19	50706577	F	MYH14	TSS1500	0.174221	0.0134994	4.1716e-38	0.145686	0.0138541	7.30969e-26
cg06462796	9	79634861	R	FOXB2	1stExon	0.205497	0.0159237	4.21331e-38	0.151502	0.0164909	4.03861e-20
cg07502829	13	112708288	R			0.198782	0.0154034	4.21343e-38	0.151701	0.015834	9.63595e-22
cg10182317	6	123317487	F	CLVS2	TSS200	0.182383	0.0141327	4.21779e-38	0.136198	0.0147025	1.97692e-20
cg13561879	8	35092687	R	UNC5D	TSS1500	0.184425	0.0142917	4.2518e-38	0.157777	0.0145848	2.83124e-27
cg14425564	9	126794772	R	LHX2	Body	0.193658	0.0150081	4.29718e-38	0.153843	0.0155419	4.2196e-23
cg04878119	7	97558075	F			-0.175688	0.0136159	4.32145e-38	-0.174924	0.0147138	1.35852e-32
cg06360427	18	74962672	R	GALR1	1stExon	0.207495	0.0160846	4.49017e-38	0.147679	0.0164771	3.16825e-19
cg21692159	17	36898937	R	PCGF2	5'UTR	-0.220508	0.0170942	4.52349e-38	-0.225582	0.0175197	6.15029e-38
cg00812833	1	242687412	F	PLD5	5'UTR	0.194416	0.0150723	4.56679e-38	0.149471	0.0152166	8.97448e-23
cg14311597	17	2652531	F	MIR1253	TSS1500	0.192922	0.0149576	4.62387e-38	0.161151	0.0153669	9.92244e-26
cg26636193	5	146889265	F			0.193794	0.0150278	4.75725e-38	0.148521	0.0152158	1.65529e-22
cg19011552	X	146364725	R	MIR514-2	TSS1500	-0.189835	0.0147215	4.79806e-38	-0.159836	0.0147301	1.97267e-27
cg25345178	8	72459908	F			0.194827	0.0151102	4.88198e-38	0.1646	0.0152046	2.60042e-27
cg20408175	12	53693169	F	PFDN5	3'UTR	-0.181915	0.0141089	4.88427e-38	-0.154183	0.0142623	3.06955e-27
cg02406092	19	39876337	F	PAF1	3'UTR	-0.224865	0.017441	4.93765e-38	-0.214712	0.0182744	7.11683e-32
cg07203423	2	74743009	R	TLX2	Body	0.20751	0.0160959	4.98636e-38	0.165628	0.0166636	2.80291e-23
cg09754845	7	1408818	R			0.205121	0.0159128	5.10306e-38	0.180102	0.0150593	5.79092e-33
cg24611446	12	113917737	F			0.207999	0.0161394	5.28432e-38	0.182959	0.0161819	1.21974e-29
cg20457796	10	50819500	R	SLC18A3	1stExon	0.177481	0.0137745	5.48775e-38	0.149699	0.0140107	1.20145e-26
cg19848940	12	112250795	R			-0.211732	0.0164386	5.82265e-38	-0.150565	0.0174157	5.36389e-18
cg14511946	9	23850969	R			0.184601	0.0143328	5.86766e-38	0.142113	0.0150293	3.20719e-21
cg22348673	7	28997925	R	TRIL	5'UTR	0.213855	0.0166048	5.90497e-38	0.168852	0.016633	3.25901e-24
cg01097384	11	1358675	F			0.215158	0.0167072	5.97319e-38	0.208932	0.0167195	7.82277e-36
cg01567771	14	22191382	F			-0.190151	0.0147656	5.98464e-38	-0.159336	0.0145406	6.08085e-28
cg07382454	19	19383976	R	TM6SF2	1stExon	0.202143	0.0157	6.19398e-38	0.167509	0.0163552	1.28676e-24
cg04969688	15	30114816	F	TJP1	TSS200	0.166456	0.0129288	6.24008e-38	0.161143	0.0126488	3.553e-37
cg01013590	2	120281719	R	SCTR	Body	0.206895	0.0160706	6.2938e-38	0.165677	0.0165329	1.2316e-23
cg16001165	4	129581866	F			-0.218952	0.0170073	6.30675e-38	-0.188621	0.0179687	8.89458e-26
cg10803722	21	46713166	R	LOC642852	Body	-0.229327	0.0178151	6.4175e-38	-0.255622	0.0186889	1.37855e-42
cg03397716	1	6484980	R	ESPN	1stExon	0.212354	0.0164992	6.59704e-38	0.208862	0.0164931	9.40355e-37
cg17696377	16	23724561	R	ERN2	1stExon	0.179791	0.0139715	6.77764e-38	0.151646	0.0146873	5.43664e-25
cg04749646	2	217236630	F	2004-03-01	5'UTR	0.214331	0.0166603	7.10545e-38	0.174112	0.0166483	1.34323e-25
cg26068551	1	57111117	R	PRKAA2	1stExon	0.205851	0.0160016	7.13605e-38	0.159612	0.0167544	1.6263e-21
cg16276108	5	180213189	F			-0.195212	0.0151759	7.24314e-38	-0.177345	0.0160101	1.61976e-28
cg03178798	18	10032699	F			0.174542	0.0135711	7.42725e-38	0.127047	0.0142745	5.57056e-19
cg24500832	12	54394212	F	HOXC9	1stExon	0.20929	0.0162733	7.46472e-38	0.106594	0.016459	9.39675e-11
cg15887709	7	1270976	R			0.193091	0.0150138	7.4712e-38	0.139846	0.0150715	1.71348e-20
cg20076842	3	28617743	F			0.195323	0.015189	7.60346e-38	0.170296	0.0154044	2.07247e-28
cg18267374	8	24771273	F	NEFM	TSS1500	0.219053	0.0170347	7.63507e-38	0.231127	0.0176535	3.63625e-39
cg13106156	6	33140934	F	COL11A2	Body	-0.183024	0.0142366	7.97162e-38	-0.148877	0.0140377	2.81044e-26
cg01506917	6	42417086	R	TRERF1	5'UTR	-0.205249	0.0159663	8.05205e-38	-0.207683	0.016702	1.69532e-35
cg22153181	4	172734431	F	GALNTL6	TSS200	0.173955	0.0135329	8.1482e-38	0.127051	0.0140119	1.2195e-19
cg16201146	20	19191526	R			-0.163336	0.012711	8.60333e-38	-0.141247	0.0126231	4.58988e-29
cg01916333	5	121647634	R	SNCAIP	TSS200	0.193035	0.0150267	9.04336e-38	0.159503	0.0155264	9.32436e-25
cg04812351	4	73177995	F	ADAMTS3	Body	-0.22512	0.0175261	9.1944e-38	-0.190552	0.0177607	7.45024e-27
cg02940165	19	57149563	F			0.169682	0.0132151	9.78822e-38	0.14086	0.0131252	7.20023e-27
cg26558485	1	47489282	R	CYP4X1	1stExon	0.157063	0.0122333	9.91622e-38	0.145329	0.0121827	8.34498e-33
cg04052934	6	147179017	R			-0.230215	0.0179316	9.98117e-38	-0.220012	0.0185865	2.50675e-32
cg09307530	5	2739257	F			0.197391	0.0153758	1.00733e-37	0.116328	0.0158071	1.84929e-13
cg10039188	6	72130209	F	C6orf155	Body	0.207065	0.0161294	1.00791e-37	0.194814	0.0165323	4.72819e-32
cg12307787	20	48099359	R	KCNB1	TSS200	0.196784	0.01533	1.02358e-37	0.149865	0.0158133	2.61285e-21
cg05404236	13	110437093	R	IRS2	1stExon	0.236342	0.0184133	1.03871e-37	0.236697	0.0191001	2.87235e-35
cg24578124	19	497828	F	MADCAM1	Body	0.188913	0.0147188	1.04676e-37	0.13503	0.0149402	1.59446e-19
cg07839457	16	57023022	R	NLRC5	TSS1500	-0.226205	0.0176253	1.0562e-37	-0.239676	0.0176751	6.90582e-42
cg24851854	1	59042275	R	TACSTD2	1stExon	0.204122	0.0159048	1.05796e-37	0.175807	0.016001	4.40216e-28
cg06911487	19	10024282	R	OLFM2	Body	0.1996	0.0155545	1.08139e-37	0.18492	0.0158695	2.22852e-31
cg00107187	14	105070998	F	TMEM179	1stExon	0.19469	0.0151725	1.08821e-37	0.162065	0.0154499	9.63563e-26
cg14069287	4	169631613	F	PALLD	Body	-0.200985	0.0156637	1.09581e-37	-0.171574	0.0165454	3.39841e-25
cg27067781	6	32116853	R	PRRT1	3'UTR	0.229792	0.0179099	1.1071e-37	0.205553	0.018605	2.23469e-28
cg07028914	6	85474090	R	TBX18	TSS200	0.186635	0.0145473	1.12152e-37	0.148284	0.0149938	4.61347e-23
cg22374057	18	11148682	R	FAM38B	5'UTR	0.187398	0.0146075	1.12941e-37	0.139634	0.0153702	1.03954e-19
cg25570278	14	23306509	F	MMP14	Body	0.182804	0.014251	1.15117e-37	0.141973	0.0145833	2.1321e-22
cg10158541	13	37006265	R	CCNA1	1stExon	0.213773	0.0166655	1.1528e-37	0.152913	0.0170949	3.72141e-19
cg11700800	5	92906633	F	FLJ42709	Body	0.19717	0.0153713	1.15576e-37	0.166359	0.0155318	9.04972e-27
cg26118906	14	58332488	R			0.191746	0.0149487	1.15785e-37	0.121182	0.0155008	5.3751e-15
cg12355110	19	57617754	R			0.188319	0.0146828	1.17485e-37	0.137878	0.014772	1.02258e-20
cg23944804	20	11871384	F	BTBD3	TSS200	0.187339	0.0146136	1.27559e-37	0.116036	0.0148733	6.11031e-15
cg03753331	2	115919006	R	DPP10	TSS1500	0.199017	0.0155281	1.32376e-37	0.152569	0.0160109	1.58661e-21
cg16435923	5	140744155	R	PCDHGA4	Body	0.207998	0.0162294	1.33151e-37	0.205002	0.0161493	6.37202e-37
cg00565688	1	3568212	F	TP73	TSS1500	0.185547	0.0144787	1.34869e-37	0.163389	0.0150977	2.70517e-27
cg26126806	17	17685031	F	RAI1	5'UTR	0.170279	0.0132887	1.37244e-37	0.125697	0.014285	1.37791e-18
cg25984344	10	128994608	F	DOCK1	Body	0.189019	0.0147516	1.37773e-37	0.149899	0.0149481	1.14907e-23
cg00688447	8	55379910	R			0.217282	0.0169573	1.37811e-37	0.189315	0.0174253	1.70364e-27
cg07005055	1	113052167	R	WNT2B	Body	0.222864	0.0173934	1.38409e-37	0.160176	0.0179135	3.83543e-19
cg17302155	6	100061111	F	PRDM13	Body	0.183562	0.0143261	1.38441e-37	0.162887	0.0148591	5.8118e-28
cg20886049	11	76493545	R	TSKU	TSS1500	-0.240156	0.0187436	1.39243e-37	-0.171594	0.019623	2.23963e-18
cg14156405	1	241520286	R	RGS7	5'UTR	0.211194	0.0164835	1.39683e-37	0.162717	0.0167466	2.56663e-22
cg00388812	8	99961376	R	OSR2	Body	0.184562	0.0144081	1.44805e-37	0.139566	0.0150027	1.36934e-20
cg14866863	14	58332116	R			0.196569	0.015346	1.45766e-37	0.162728	0.0155101	9.42678e-26
cg21494776	19	10397780	F	ICAM4	1stExon	0.180499	0.0140936	1.494e-37	0.116751	0.0146645	1.70083e-15
cg01829241	4	8582249	R	GPR78	TSS200	0.207132	0.0161754	1.52883e-37	0.167417	0.0162988	9.44881e-25
cg18194945	3	157820591	R	SHOX2	Body	0.184445	0.014407	1.58968e-37	0.14864	0.0152512	1.91705e-22
cg03484180	3	49967517	F	MON1A	TSS200	-0.222826	0.0174078	1.63233e-37	-0.222744	0.0179886	3.25e-35
cg00153306	3	46741492	F	TMIE	TSS1500	-0.191717	0.0149775	1.63254e-37	-0.204423	0.0153354	1.54735e-40
cg16483916	19	5567758	F	PLAC2	Body	0.192463	0.0150366	1.64721e-37	0.156384	0.0149332	1.15847e-25
cg14006181	14	29254942	F	C14orf23	Body	0.163595	0.0127821	1.66567e-37	0.159926	0.0130826	2.30434e-34
cg14754787	17	35299600	F	LHX1	Body	0.206704	0.0161514	1.68424e-37	0.149256	0.0162449	4.00719e-20
cg10052840	19	4558119	R	SEMA6B	Body	-0.243557	0.0190318	1.69581e-37	-0.183631	0.0197554	1.46899e-20
cg10577534	15	67354460	F			-0.225661	0.0176348	1.71823e-37	-0.21648	0.0180064	2.71001e-33
cg00336320	6	36253099	F	PNPLA1	5'UTR	0.194977	0.015237	1.72008e-37	0.134089	0.0170503	3.71067e-15
cg00182727	20	44640501	R	MMP9	Body	0.194234	0.0151795	1.72997e-37	0.159112	0.0154551	7.41058e-25
cg12818557	8	89340139	R	MMP16	TSS1500	0.178438	0.0139462	1.75473e-37	0.134396	0.0141564	2.23036e-21
cg03524083	18	70534316	F	NETO1	TSS1500	0.179934	0.0140647	1.7858e-37	0.10295	0.0146468	2.08306e-12
cg03354992	10	88149475	R			0.191661	0.0149841	1.84338e-37	0.133628	0.0150974	8.66759e-19
cg05331060	6	31459999	R			-0.243823	0.0190644	1.87706e-37	-0.241132	0.019549	5.88826e-35
cg20449685	19	58545728	R	ZSCAN1	5'UTR	0.193232	0.0151096	1.89648e-37	0.128718	0.0153964	6.25968e-17
cg12002303	15	68113478	R			0.207737	0.0162455	1.92957e-37	0.183187	0.0161466	7.83197e-30
cg26248284	4	41362853	F	LIMCH1	1stExon	0.178703	0.013977	1.9754e-37	0.148164	0.0143299	4.67034e-25
cg13944175	19	52222698	R	HAS1	Body	0.19507	0.0152591	2.01812e-37	0.156498	0.0157228	2.43349e-23
cg24911113	19	23185714	R			0.182148	0.0142491	2.03842e-37	0.159602	0.0144222	1.82662e-28
cg20318166	15	85360664	R	ALPK3	1stExon	0.196227	0.0153506	2.03914e-37	0.134659	0.0161741	8.39288e-17
cg14997413	7	51384937	F	COBL	TSS1500	0.194009	0.0151782	2.06494e-37	0.156839	0.0155737	7.44057e-24
cg20065463	2	220283156	F	DES	1stExon	0.209799	0.0164138	2.07063e-37	0.151006	0.0173675	3.47687e-18
cg22280038	7	79083408	R	MAGI2	TSS1500	0.185355	0.0145018	2.0794e-37	0.132511	0.0150004	1.0113e-18
cg00695112	9	71862747	R	TJP2	Body	-0.22838	0.0178701	2.1212e-37	-0.200993	0.0184514	1.24367e-27
cg02005147	14	100111340	R	HHIPL1	TSS200	0.188515	0.0147508	2.12205e-37	0.122871	0.0155559	2.81888e-15
cg01557798	1	228400628	R	OBSCN	Body	0.237041	0.0185485	2.13322e-37	0.221101	0.0190874	4.99162e-31
cg13278478	7	56160911	F	PHKG1	TSS1500	-0.216827	0.0169717	2.2374e-37	-0.210348	0.0173686	9.26158e-34
cg00725138	22	19716556	R			-0.18331	0.0143491	2.26032e-37	-0.1635	0.0142741	2.23714e-30
cg26422161	6	1313211	R	FOXQ1	1stExon	0.213205	0.016692	2.32459e-37	0.192995	0.0170445	1.00963e-29
cg12432010	12	176081	F	IQSEC3	1stExon	0.186802	0.0146254	2.33683e-37	0.149659	0.014753	3.51339e-24
cg24073122	1	3567986	R	TP73	TSS1500	0.191321	0.0149797	2.35072e-37	0.172088	0.0153726	4.33982e-29
cg17554604	7	140774522	F			0.1802	0.014111	2.40461e-37	0.155407	0.0148147	9.59661e-26
cg00445126	2	63276010	F	LOC100132215	TSS1500	0.187519	0.0146846	2.4182e-37	0.162002	0.0152373	2.11658e-26
cg06826457	12	12867669	R			-0.198651	0.0155571	2.43621e-37	-0.191791	0.0157332	3.5052e-34
cg02694017	19	54485509	R	CACNG8	Body	0.207471	0.0162493	2.47474e-37	0.162005	0.0164286	6.13619e-23
cg15108590	21	44494906	F	CBS	5'UTR	0.180202	0.0141138	2.47888e-37	0.16219	0.0148511	9.13542e-28
cg03664992	1	39957393	F	BMP8A	1stExon	0.216436	0.0169518	2.48132e-37	0.203091	0.0175129	4.28425e-31
cg21609640	1	166890380	F	ILDR2	Body	0.187928	0.0147194	2.49473e-37	0.14078	0.0152956	3.44914e-20
cg02063488	2	73496909	F	FBXO41	Body	0.233482	0.0182881	2.51062e-37	0.192991	0.0188643	1.44838e-24
cg26373518	22	31518942	R	INPP5J	TSS200	-0.21712	0.0170089	2.56736e-37	-0.214008	0.0175397	3.05664e-34
cg17051321	15	83952508	F	BNC1	Body	0.202497	0.0158669	2.66659e-37	0.149121	0.0161908	3.25535e-20
cg13944685	11	71710643	F	IL18BP	TSS200	-0.211995	0.0166112	2.66737e-37	-0.177353	0.0155602	4.28737e-30
cg27269561	16	3072713	F	HCFC1R1	3'UTR	-0.222351	0.0174233	2.68435e-37	-0.211181	0.0176051	3.7537e-33
cg08432727	2	5831722	F	SOX11	TSS1500	0.193185	0.0151391	2.7179e-37	0.123076	0.0154398	1.56937e-15
cg26140475	8	126525558	R			-0.198242	0.0155379	2.78955e-37	-0.133106	0.016182	1.94249e-16
cg27393010	7	121940216	F			0.185368	0.0145303	2.83696e-37	0.124004	0.0147227	3.6816e-17
cg26280713	6	169653928	R	THBS2	5'UTR	0.196933	0.0154368	2.83805e-37	0.202277	0.0153472	1.14286e-39
cg02829688	1	119527008	F	TBX15	5'UTR	0.185692	0.0145582	2.91822e-37	0.16664	0.0142624	1.54212e-31
cg03763300	8	69246056	R			-0.247011	0.0193663	2.93629e-37	-0.251854	0.0198533	7.09274e-37
cg03146949	19	56879662	F	ZNF542	TSS200	0.198832	0.0155895	2.9534e-37	0.170815	0.0160209	1.532e-26
cg15843567	10	26223206	F	MYO3A	1stExon	0.190155	0.01491	2.9794e-37	0.146867	0.0152693	6.68286e-22
cg06647068	12	104853274	R	CHST11	Body	-0.201968	0.0158365	2.98818e-37	-0.207639	0.016586	5.87976e-36
cg08832906	7	139208852	R	CLEC2L	1stExon	0.198395	0.0155584	3.05344e-37	0.16254	0.015774	6.74159e-25
cg02155398	2	45160490	F			0.178301	0.013983	3.068e-37	0.116632	0.0144512	6.98706e-16
cg14666113	8	11561724	R	GATA4	1stExon	0.204001	0.0160006	3.13513e-37	0.154891	0.0163384	2.53871e-21
cg00840332	7	127881269	R	LEP	TSS200	0.19384	0.0152038	3.14016e-37	0.122342	0.0156773	6.00665e-15
cg21415530	8	140715802	R	KCNK9	TSS1500	0.205742	0.0161463	3.43867e-37	0.159183	0.0163789	2.50804e-22
cg11215976	1	236849942	F	ACTN2	1stExon	0.213576	0.0167614	3.44685e-37	0.202507	0.016661	5.42582e-34
cg01503065	4	155411806	R	DCHS2	1stExon	0.212717	0.0166943	3.45993e-37	0.185935	0.0169025	3.80165e-28
cg06881421	2	67461943	R			-0.188468	0.0147914	3.46618e-37	-0.146843	0.0149473	8.871e-23
cg17941572	1	63784454	F			0.186627	0.0146486	3.52971e-37	0.156447	0.0150777	3.18616e-25
cg02400433	6	100054987	F	PRDM13	1stExon	0.193708	0.0152053	3.56738e-37	0.156465	0.0155927	1.07486e-23
cg23267759	18	19751335	F	GATA6	Body	0.208825	0.0163931	3.6079e-37	0.164878	0.0166206	3.40321e-23
cg04609576	5	126626362	R	MEGF10	TSS200	0.179327	0.0140775	3.61047e-37	0.160669	0.0142707	2.09846e-29
cg09559189	8	25898412	R	EBF2	Body	0.188259	0.0147797	3.65078e-37	0.142906	0.0151718	4.54481e-21
cg11701471	8	54164051	R	OPRK1	5'UTR	0.193232	0.0151702	3.65427e-37	0.153379	0.0155263	5.15248e-23
cg17131553	8	116676938	F	TRPS1	5'UTR	-0.238702	0.0187438	3.77865e-37	-0.267466	0.0192446	6.49281e-44
cg04560225	1	91195336	F			0.189128	0.0148511	3.78361e-37	0.146522	0.0152828	9.03354e-22
cg18490614	15	27213362	F			0.161159	0.0126568	3.87649e-37	0.162293	0.0127499	4.08245e-37
cg17401106	20	3650493	R	ADAM33	Body	-0.166082	0.0130447	3.93646e-37	-0.169142	0.0127187	2.35619e-40
cg20688709	1	236227534	R	NID1	Body	0.18456	0.0144988	4.06455e-37	0.135475	0.0153354	1.0085e-18
cg21638161	8	144512759	R	MAFA	TSS200	0.211361	0.0166044	4.06814e-37	0.173806	0.0163252	1.81061e-26
cg16553435	16	89267943	F			0.192339	0.0151102	4.07696e-37	0.142326	0.015088	3.98409e-21
cg05638174	10	122739236	R			0.191541	0.0150492	4.15417e-37	0.127702	0.015332	8.14097e-17
cg15916399	18	67068457	F	DOK6	1stExon	0.193047	0.0151686	4.20063e-37	0.160952	0.0154897	2.72699e-25
cg20941110	15	83953819	R	BNC1	TSS1500	0.206107	0.0161954	4.22379e-37	0.154169	0.0164155	5.90467e-21
cg19753867	20	35383166	R	DSN1	Body	-0.228504	0.0179554	4.22838e-37	-0.232095	0.0167121	7.50327e-44
cg16085531	16	54322938	R			0.180592	0.0141906	4.22887e-37	0.164499	0.0142945	1.20402e-30
cg27467929	8	68864529	R	PREX2	TSS200	0.201831	0.0158595	4.23134e-37	0.15067	0.0163724	3.49059e-20
cg09168222	4	89299733	R	HERC6	TSS200	-0.204791	0.0160921	4.23217e-37	-0.201118	0.0170415	3.82672e-32
cg27302539	14	54413548	F			0.178175	0.0140007	4.23325e-37	0.128574	0.0143213	2.76199e-19
cg21829923	2	171573891	R	SP5	Body	0.201931	0.0158675	4.23752e-37	0.168761	0.0159532	3.74854e-26
cg14502484	5	1446208	F	SLC6A3	TSS1500	0.194835	0.0153103	4.2517e-37	0.141275	0.015852	5.00641e-19
cg18863595	3	6902845	R	GRM7	1stExon	0.167855	0.0131918	4.33852e-37	0.127818	0.0131775	3.02296e-22
cg04731544	19	49004834	R	LMTK3	Body	0.214508	0.0168587	4.35665e-37	0.239085	0.01731	2.15759e-43
cg10476085	5	142065737	R	FGF1	5'UTR	-0.2267	0.017817	4.3613e-37	-0.244589	0.0184079	2.74831e-40
cg15957394	4	7941823	F	AFAP1	TSS200	0.243742	0.0191609	4.53288e-37	0.209879	0.0194035	2.87412e-27
cg02327997	10	128077318	F	ADAM12	TSS200	0.185843	0.0146116	4.64222e-37	0.152556	0.0144527	4.78835e-26
cg08315202	7	98246006	R	NPTX2	TSS1500	0.207092	0.0162824	4.64811e-37	0.181521	0.0163974	1.75253e-28
cg21834207	1	50489827	R	AGBL4	TSS1500	0.197056	0.0154959	4.77918e-37	0.172755	0.0159851	3.1802e-27
cg16997364	19	39755575	R			0.196421	0.0154468	4.81939e-37	0.157185	0.0157903	2.40911e-23
cg12544191	5	172671754	F			0.177956	0.0139953	4.85178e-37	0.147834	0.0149038	3.43443e-23
cg16765088	15	99640471	R			-0.186909	0.0146995	4.85892e-37	-0.192248	0.0142446	1.6463e-41
cg18801806	11	118869385	F	CCDC84	Body	-0.189666	0.0149165	4.87021e-37	-0.191808	0.0156382	1.39031e-34
cg04275362	1	167598560	F	RCSD1	TSS1500	-0.22933	0.0180394	5.02186e-37	-0.267074	0.0183291	4.28962e-48
cg05213896	19	50393653	R	IL4I1	Body	0.220451	0.0173425	5.0978e-37	0.210042	0.0182817	1.49524e-30
cg15132565	5	72740154	F			0.197081	0.015504	5.09921e-37	0.167453	0.0156857	1.32523e-26
cg10426318	6	30647588	R	KIAA1949	Body	-0.172313	0.0135564	5.14711e-37	-0.178433	0.0133706	1.26366e-40
cg10912240	14	29235907	F	FOXG1	TSS1500	0.180772	0.0142228	5.20356e-37	0.174748	0.0140601	1.82578e-35
cg12541454	4	174437915	R			0.197187	0.0155148	5.23136e-37	0.156417	0.0161804	4.16288e-22
cg02245004	15	76634887	R			0.201645	0.0158657	5.23733e-37	0.180138	0.0161053	4.82657e-29
cg09655666	17	34820190	R			0.193574	0.0152309	5.24616e-37	0.215517	0.0150263	1.18468e-46
cg05469614	16	3142818	R	ZSCAN10	1stExon	-0.212191	0.0166971	5.31906e-37	-0.152043	0.0169437	2.8752e-19
cg14068328	6	85474087	R	TBX18	TSS200	0.176954	0.0139248	5.34602e-37	0.155573	0.014291	1.34371e-27
cg05533124	18	24443298	F	AQP4	TSS1500	0.185991	0.0146394	5.55906e-37	0.140018	0.0153793	8.6819e-20
cg14074174	19	7986206	F	SNAPC2	Body	-0.214463	0.0168823	5.65783e-37	-0.226089	0.0172786	4.01823e-39
cg02106850	6	85474093	R	TBX18	TSS200	0.176605	0.0139024	5.67747e-37	0.139477	0.0145296	8.03225e-22
cg07540103	17	6679499	R	FBXO39	TSS200	0.186336	0.0146715	5.8747e-37	0.167452	0.0146081	2.02335e-30
cg00340855	6	30458586	F	HLA-E	Body	-0.19385	0.0152633	5.88334e-37	-0.211593	0.0154812	1.58167e-42
cg08141192	4	22517094	R	GPR125	Body	0.185338	0.0145932	5.88937e-37	0.156503	0.0149897	1.61668e-25
cg00310215	16	51185346	F	SALL1	TSS1500	0.195064	0.0153592	5.8998e-37	0.171927	0.0153655	4.60697e-29
cg21573200	5	2739602	R			0.19197	0.0151166	5.96173e-37	0.138818	0.0156301	6.59957e-19
cg17605476	4	158143917	F	GRIA2	Body	0.189293	0.0149072	6.05665e-37	0.151398	0.0151336	1.46203e-23
cg11773346	19	11750910	R			0.193771	0.0152601	6.07589e-37	0.186035	0.0156376	1.23237e-32
cg17840719	5	178368253	R	ZNF454	1stExon	0.166232	0.0130918	6.11143e-37	0.135884	0.0129809	1.21198e-25
cg14328457	17	37381475	F	STAC2	Body	0.204852	0.0161356	6.25307e-37	0.189928	0.0164292	6.54159e-31
cg21800232	5	79866368	F	ANKRD34B	TSS200	0.210092	0.0165505	6.38805e-37	0.161696	0.0168909	1.03885e-21
cg08640634	6	108486450	R	NR2E1	TSS1500	0.19615	0.0154531	6.44417e-37	0.134362	0.0154524	3.46163e-18
cg14306734	18	34833938	R	BRUNOL4	Body	0.210791	0.0166096	6.64249e-37	0.16291	0.016742	2.23316e-22
cg01569083	6	31543289	R	TNF	TSS200	-0.226931	0.0178821	6.68836e-37	-0.193858	0.01841	6.28127e-26
cg02664812	1	88928467	F			0.198243	0.0156228	6.77717e-37	0.181869	0.0159429	3.83284e-30
cg23436584	12	98833359	R			-0.174644	0.0137633	6.79534e-37	-0.179193	0.0143078	5.50855e-36
cg16888547	7	32339497	F			-0.229386	0.0180816	7.05137e-37	-0.202759	0.0187072	2.25935e-27
cg05365199	1	221604887	R			-0.21757	0.0171523	7.19754e-37	-0.203404	0.0164418	3.74422e-35
cg01850269	6	100903227	F	SIM1	Body	0.209242	0.0164963	7.23667e-37	0.175822	0.0166455	4.43816e-26
cg19485202	19	18902081	R	COMP	1stExon	0.196685	0.0155082	7.37521e-37	0.179445	0.0160869	6.78734e-29
cg05553502	5	92924091	R	NR2F1	Body	0.204816	0.0161504	7.46358e-37	0.155495	0.0162151	8.84799e-22
cg03523785	14	29234981	F	FOXG1	TSS1500	0.191166	0.015075	7.53867e-37	0.16172	0.0155189	1.99164e-25
cg06914505	15	39464601	F			-0.205145	0.0161783	7.60341e-37	-0.174098	0.0168227	4.22847e-25
cg22070406	18	55019708	R	ST8SIA3	TSS200	0.190743	0.0150448	7.80252e-37	0.173936	0.0152375	3.51819e-30
cg13914083	4	158141526	R	GRIA2	TSS1500	0.174222	0.0137423	7.85236e-37	0.110179	0.0143877	1.89024e-14
cg18747039	13	100650031	R			0.198221	0.0156369	7.98253e-37	0.148657	0.0162204	4.96361e-20
cg02919422	8	55370544	R	SOX17	5'UTR	0.186005	0.0146741	8.06097e-37	0.137637	0.0149232	2.88754e-20
cg05942128	2	176972020	R	HOXD11	TSS200	0.198147	0.0156327	8.1168e-37	0.178409	0.0149605	8.73168e-33
cg13127741	20	31331821	F	COMMD7	TSS200	-0.192435	0.0151826	8.16732e-37	-0.183759	0.0144233	3.52554e-37
cg24698655	6	28557774	F			0.23321	0.0184031	8.41614e-37	0.264558	0.0183837	5.90411e-47
cg06200092	14	54413763	F			0.174462	0.0137693	8.63707e-37	0.140669	0.0143032	7.97775e-23
cg06819357	14	102928437	F	TECPR2	Body	-0.199661	0.0157582	8.64225e-37	-0.1739	0.015984	1.44119e-27
cg07202479	1	159174162	R	DARC	TSS1500	-0.211718	0.0167098	8.64471e-37	-0.204202	0.0173188	4.35505e-32
cg25308508	5	3592638	F			0.182216	0.0143836	8.85708e-37	0.154014	0.0145874	4.66468e-26
cg09082287	1	65730494	R	DNAJC6	5'UTR	0.165295	0.0130512	9.22568e-37	0.132486	0.013172	8.45632e-24
cg21120249	9	139921971	R	C9orf139	5'UTR	-0.189407	0.0149561	9.33768e-37	-0.170401	0.0154924	3.8637e-28
cg23891996	19	9517858	F			0.183331	0.0144767	9.37094e-37	0.170903	0.0144778	3.69935e-32
cg25788549	7	150786044	F	AGAP3	Body	0.140484	0.0110933	9.38234e-37	0.106981	0.0116635	4.62827e-20
cg07069636	16	30671749	F			-0.186615	0.0147373	9.50707e-37	-0.177254	0.014407	8.6913e-35
cg16026922	4	41259044	R	UCHL1	Body	0.179185	0.0141554	1.00478e-36	0.140027	0.0143365	1.55679e-22
cg15149095	1	210111672	R	SYT14	Body	0.223752	0.0176765	1.00827e-36	0.16559	0.0186481	6.70213e-19
cg01897498	9	95572081	R	ANKRD19	Body	0.194585	0.0153755	1.04251e-36	0.167543	0.0153344	8.66613e-28
cg23934731	15	89904873	R			0.231461	0.0182913	1.06126e-36	0.22677	0.0185036	1.57044e-34
cg04454086	5	140345966	F	PCDHAC2	1stExon	0.188766	0.0149187	1.07682e-36	0.116992	0.0152919	2.00032e-14
cg22543892	7	85157964	F			-0.197873	0.0156399	1.09404e-36	-0.181081	0.0165681	8.33365e-28
cg00503383	1	91301651	F			0.192987	0.0152549	1.10698e-36	0.176634	0.0157956	4.97002e-29
cg16509239	11	62212431	R	AHNAK	Body	-0.229861	0.01817	1.11038e-36	-0.263601	0.0184015	1.52789e-46
cg07029873	1	217311014	F	ESRRG	1stExon	0.190842	0.0150862	1.11725e-36	0.146741	0.0155576	4.01977e-21
cg04157263	17	37752991	F			0.19171	0.015157	1.14265e-36	0.135166	0.0152699	8.61089e-19
cg00947744	22	50945565	R	NCAPH2	TSS1500	-0.223166	0.017644	1.14362e-36	-0.195031	0.0176153	1.7214e-28
cg14772615	6	33116235	F			-0.22338	0.0176618	1.1536e-36	-0.221049	0.0183305	1.73792e-33
cg22418909	8	41166738	F	SFRP1	1stExon	0.208859	0.0165171	1.19202e-36	0.162911	0.0166252	1.13644e-22
cg03024760	15	27215997	R	GABRG3	TSS1500	0.187423	0.0148223	1.19822e-36	0.142785	0.0151413	4.09427e-21
cg12627844	2	64245000	R	VPS54	5'UTR	-0.19208	0.0151944	1.24671e-36	-0.166856	0.0159883	1.69602e-25
cg25722983	1	36840028	F	STK40	5'UTR	-0.219327	0.0173506	1.25616e-36	-0.179783	0.0171669	1.15328e-25
cg18384778	19	57618136	F			0.181777	0.0143807	1.26538e-36	0.138441	0.0143993	6.95359e-22
cg01927745	5	72677723	R			0.192507	0.0152301	1.2725e-36	0.149947	0.0153283	1.34026e-22
cg26813646	10	50817651	F	SLC18A3	TSS1500	0.191283	0.0151336	1.27667e-36	0.155258	0.0156126	2.66801e-23
cg04228468	3	164913627	F	SLITRK3	5'UTR	0.162111	0.0128257	1.27752e-36	0.151435	0.0137427	3.08269e-28
cg04188862	15	88801474	F			0.191291	0.0151343	1.27808e-36	0.17032	0.0162689	1.19831e-25
cg24353443	3	73674166	F	PDZRN3	TSS200	0.169295	0.0133966	1.31758e-36	0.154813	0.0138013	3.35387e-29
cg05924652	6	39016363	F	GLP1R	TSS200	0.189832	0.0150217	1.31771e-36	0.130562	0.0153175	1.54543e-17
cg09253473	17	79877389	R	MAFG	3'UTR	-0.173443	0.0137258	1.33276e-36	-0.128578	0.0140124	4.47346e-20
cg13378934	19	47910580	F	MEIS3	Body	0.216573	0.0171393	1.33645e-36	0.192325	0.0169505	7.74139e-30
cg01410472	8	75896975	R	CRISPLD1	1stExon	0.175957	0.0139264	1.35753e-36	0.136399	0.0141715	6.27529e-22
cg03044249	7	70597065	R	WBSCR17	TSS1500	0.193749	0.0153384	1.41342e-36	0.184586	0.0157902	1.43472e-31
cg22966986	14	48143852	R	MDGA2	5'UTR	0.179896	0.0142424	1.42364e-36	0.13489	0.014825	9.12919e-20
cg05044185	15	27112197	F	GABRA5	TSS200	0.185598	0.0146957	1.45412e-36	0.149432	0.0151309	5.29293e-23
cg19284211	20	20347495	F	INSM1	TSS1500	0.189905	0.0150381	1.47465e-36	0.15627	0.0157009	2.44852e-23
cg18240400	10	46168597	R	ANUBL1	TSS1500	0.228208	0.0180751	1.52729e-36	0.177557	0.0189558	7.46982e-21
cg18866015	18	49868552	F	DCC	Body	0.181892	0.0144071	1.53445e-36	0.141469	0.0147879	1.10528e-21
cg10947408	10	77155404	R			0.222718	0.0176442	1.58249e-36	0.187542	0.0181793	5.95264e-25
cg23244910	6	106434169	R			0.182941	0.0144951	1.62001e-36	0.132424	0.0150766	1.58511e-18
cg27213509	2	176947228	R	EVX2	Body	0.206626	0.0163744	1.66277e-36	0.209111	0.0165188	9.97798e-37
cg18557131	13	100624207	F	ZIC5	TSS200	0.200232	0.0158681	1.66815e-36	0.162047	0.0155445	1.91212e-25
cg24843380	5	178367827	F	ZNF454	TSS1500	0.179335	0.0142122	1.67317e-36	0.176764	0.0140125	1.75142e-36
cg06126421	6	30720080	R			-0.183109	0.0145125	1.69524e-36	-0.139649	0.0151645	3.29392e-20
cg05661282	19	58220370	R	ZNF154	5'UTR	0.221349	0.0175445	1.71404e-36	0.212915	0.0178579	9.01433e-33
cg09642020	9	139379173	F	C9orf163	1stExon	-0.237752	0.0188451	1.72062e-36	-0.239842	0.0194444	5.88765e-35
cg00910882	15	65648312	R	IGDCC3	Body	0.181062	0.0143551	1.79003e-36	0.130566	0.0149059	1.96313e-18
cg02938414	4	174444166	R			0.191028	0.015146	1.80323e-36	0.168721	0.0152637	2.10306e-28
cg11131532	20	48099323	F	KCNB1	TSS200	0.195687	0.0155163	1.82008e-36	0.132748	0.0153263	4.65711e-18
cg15916646	7	27225127	F	HOXA11AS	Body	0.178896	0.0141858	1.83788e-36	0.139108	0.0139354	1.82149e-23
cg23057648	21	40984763	F	C21orf88	TSS200	0.186095	0.0147568	1.84159e-36	0.132297	0.0147927	3.77529e-19
cg10945079	2	162283856	F			0.190486	0.0151051	1.84341e-36	0.1675	0.0154669	2.49373e-27
cg18948125	2	31805970	R	SRD5A2	1stExon	0.187537	0.0148735	1.88728e-36	0.157494	0.0148088	2.04474e-26
cg15708153	19	56879554	F	ZNF542	TSS200	0.204547	0.0162234	1.90374e-36	0.154043	0.0168537	6.24668e-20
cg20779964	20	54580070	R	CBLN4	TSS200	0.174174	0.0138186	1.99735e-36	0.106279	0.0142602	9.1323e-14
cg05637536	1	154475068	F	TDRD10	5'UTR	0.175948	0.0139594	2.00091e-36	0.139869	0.0147141	1.98547e-21
cg10824107	6	10382069	R			0.17065	0.0135397	2.01411e-36	0.108485	0.015086	6.42689e-13
cg21940640	7	56160893	F	PHKG1	TSS1500	-0.201774	0.0160106	2.04494e-36	-0.16205	0.0169642	1.26649e-21
cg23093589	7	20824932	R	SP8	Body	0.204954	0.0162642	2.06963e-36	0.161237	0.0162708	3.78026e-23
cg07973435	6	100905458	R	SIM1	Body	0.166783	0.0132358	2.08779e-36	0.117421	0.0138654	2.48346e-17
cg18263365	5	136834453	R	SPOCK1	5'UTR	0.208813	0.0165727	2.11558e-36	0.139714	0.0170211	2.24367e-16
cg23325364	10	568840	F	DIP2C	Body	-0.159787	0.0126822	2.12915e-36	-0.159856	0.0129562	5.64252e-35
cg02429459	19	12175639	F	ZNF844	5'UTR	0.192672	0.0152937	2.1634e-36	0.164635	0.015559	3.63854e-26
cg26276120	12	6977747	R	TPI1	Body	-0.237859	0.0188838	2.22225e-36	-0.223052	0.0189521	5.62287e-32
cg15749870	6	123317473	R	CLVS2	TSS200	0.187587	0.0148943	2.26346e-36	0.127589	0.015487	1.74461e-16
cg18582342	19	11591989	F	ELAVL3	TSS200	0.214686	0.0170468	2.28193e-36	0.204064	0.0174851	1.79775e-31
cg27232145	12	130647289	R	FZD10	5'UTR	0.189845	0.0150756	2.31131e-36	0.16154	0.0151964	2.15736e-26
cg06265277	15	30260973	R			0.184058	0.0146167	2.32667e-36	0.15196	0.0148343	1.26114e-24
cg00468146	6	19838211	F	ID4	1stExon	0.175137	0.0139091	2.35099e-36	0.151261	0.0138064	6.22437e-28
cg06139908	7	54614620	F	VSTM2A	Body	0.186664	0.0148286	2.45334e-36	0.147446	0.0150708	1.3245e-22
cg05166490	8	41754172	R	ANK1	1stExon	0.208065	0.0165362	2.63899e-36	0.132298	0.0173547	2.4748e-14
cg18363008	17	4675114	R	TM4SF5	TSS200	-0.188881	0.0150135	2.6956e-36	-0.198005	0.0158887	1.2035e-35
cg15549927	7	153749756	F	DPP6	Body	0.181988	0.0144674	2.75035e-36	0.143921	0.0148778	3.90744e-22
cg20515136	3	159707145	R	IL12A	Body	-0.186754	0.014847	2.77191e-36	-0.226133	0.0150781	7.62982e-51
cg08305436	19	22806184	F			0.180908	0.0143826	2.78213e-36	0.150243	0.014478	3.14492e-25
cg15370180	10	23484326	R			0.193761	0.0154061	2.82979e-36	0.166651	0.0153512	1.86915e-27
cg03167683	17	47210368	F	B4GALNT2	1stExon	0.181058	0.0143983	2.90123e-36	0.137162	0.0148862	3.14041e-20
cg09765089	7	27291346	F			0.197823	0.0157317	2.90302e-36	0.158972	0.0159311	1.8886e-23
cg04167239	4	3769468	F	ADRA2C	1stExon	0.174367	0.0138664	2.90627e-36	0.146194	0.0144146	3.59576e-24
cg06676637	18	56940333	R	RAX	1stExon	0.19928	0.0158497	2.96671e-36	0.179487	0.0165378	1.9272e-27
cg01830294	7	116963492	F	WNT2	TSS200	0.162276	0.0129079	3.0166e-36	0.118034	0.0129932	1.04428e-19
cg17316316	5	180525108	F			0.196838	0.0156572	3.02166e-36	0.145164	0.0153499	3.16952e-21
cg17101296	8	145925708	F			0.186041	0.0148013	3.11856e-36	0.146049	0.0149043	1.13573e-22
cg20106459	19	55866087	R	COX6B2	5'UTR	0.198274	0.015775	3.1314e-36	0.159215	0.0162678	1.27885e-22
cg15396686	10	124897048	R	HMX3	Body	0.193716	0.0154152	3.22449e-36	0.14902	0.0154977	6.86753e-22
cg13817265	12	24104357	R	SOX5	5'UTR	-0.238154	0.0189535	3.28208e-36	-0.199834	0.0196376	2.53502e-24
cg12212311	18	77558916	R			0.189207	0.0150586	3.30205e-36	0.159285	0.0157095	3.69223e-24
cg07851675	5	2755540	R			0.217446	0.017308	3.35905e-36	0.208381	0.0172374	1.2089e-33
cg06900164	5	132158840	R	SHROOM1	Body	0.204495	0.0162785	3.40512e-36	0.155349	0.0171093	1.088e-19
cg13678973	1	50513870	F	ELAVL4	Body	0.206495	0.0164381	3.41524e-36	0.178269	0.0168991	5.13322e-26
cg16983588	11	129793108	F	PRDM10	Body	-0.220217	0.0175317	3.45636e-36	-0.227828	0.0182736	1.12152e-35
cg15243034	11	77907656	R	USP35	Body	0.206347	0.0164283	3.48256e-36	0.188466	0.0174918	4.54079e-27
cg04955333	7	2647414	F	IQCE	Body	-0.210212	0.0167367	3.50623e-36	-0.17862	0.017593	3.21763e-24
cg12033216	14	59130157	F			-0.222519	0.017717	3.52064e-36	-0.192811	0.0180792	1.48755e-26
cg20536364	5	55790102	F			-0.161853	0.0128871	3.53215e-36	-0.140988	0.0133954	6.62145e-26
cg11536474	2	63286049	F			0.194966	0.015525	3.58337e-36	0.155772	0.0158567	8.89986e-23
cg19942495	17	32484027	R	ACCN1	TSS1500	0.163093	0.012987	3.58797e-36	0.152905	0.0132052	5.25417e-31
cg24931242	8	95651433	R			0.185551	0.0147773	3.65934e-36	0.12186	0.015236	1.26298e-15
cg01812894	9	75568506	R	ALDH1A1	TSS1500	-0.229749	0.0182992	3.72316e-36	-0.247034	0.0189093	5.2785e-39
cg14016177	9	131965610	R			0.194359	0.0154805	3.72835e-36	0.156263	0.0161923	4.89504e-22
cg00474746	11	35684799	F	TRIM44	1stExon	0.190743	0.0151932	3.75388e-36	0.133413	0.0158218	3.39113e-17
cg01915516	1	3568243	F	TP73	TSS1500	0.196237	0.0156308	3.75474e-36	0.160413	0.01641	1.43675e-22
cg03593189	7	73118533	F	STX1A	Body	0.152584	0.012154	3.76686e-36	0.10619	0.0124345	1.34214e-17
cg11930955	12	113660045	F	TPCN1	5'UTR	-0.217834	0.0173523	3.79925e-36	-0.218097	0.0168278	2.04852e-38
cg26503073	7	6704074	F			0.181537	0.014461	3.8027e-36	0.144844	0.0150303	5.5931e-22
cg14832406	1	75602451	F	LHX8	Body	0.18915	0.0150678	3.81677e-36	0.153331	0.0156363	1.05978e-22
cg22620090	6	105400993	R			0.201904	0.0160854	3.87687e-36	0.211892	0.0163998	3.45563e-38
cg10479082	7	28996639	R	TRIL	1stExon	0.190763	0.0151986	3.90735e-36	0.156702	0.0154416	3.38042e-24
cg26115633	10	129535893	F	FOXI2	1stExon	0.180192	0.0143569	3.92896e-36	0.13967	0.0147238	2.40098e-21
cg15541630	8	87081770	F	PSKH2	1stExon	0.209269	0.0166738	3.93666e-36	0.156837	0.017103	4.72528e-20
cg06049781	2	72371838	R	CYP26B1	Body	0.179215	0.0142814	4.03655e-36	0.128243	0.0139717	4.3601e-20
cg26818735	7	19156621	F	TWIST1	1stExon	0.203221	0.0161949	4.05268e-36	0.176035	0.0167289	6.77983e-26
cg07012926	5	151304488	F	GLRA1	TSS200	0.194502	0.0155003	4.06043e-36	0.154977	0.0158269	1.21859e-22
cg03508063	17	7124385	R	DLG4	TSS1500	-0.197848	0.0157671	4.06741e-36	-0.197265	0.0158149	1.04359e-35
cg18044383	18	59001158	F			0.154876	0.0123438	4.1372e-36	0.134437	0.0127012	3.51562e-26
cg04859466	3	181444563	R	SOX2OT	Body	0.173195	0.0138047	4.17797e-36	0.115323	0.0141606	3.82494e-16
cg16822939	20	43922174	R	MATN4	3'UTR	0.195087	0.0155526	4.30469e-36	0.166759	0.0161213	4.45552e-25
cg02401454	16	230343	R	HBQ1	1stExon	0.202506	0.0161441	4.30906e-36	0.172509	0.0166836	4.64407e-25
cg11439596	5	1931376	F			0.180483	0.0143887	4.32027e-36	0.128144	0.0145615	1.3654e-18
cg26817217	16	52580987	R	TOX3	5'UTR	0.199993	0.0159441	4.32224e-36	0.169533	0.0163485	3.39811e-25
cg17807479	17	11145042	F	SHISA6	1stExon	0.181141	0.0144433	4.42194e-36	0.143159	0.0152254	5.31915e-21
cg11381539	7	71801535	F	CALN1	5'UTR	0.198795	0.0158527	4.49992e-36	0.14298	0.0160456	5.06498e-19
cg18160402	17	11144509	R	SHISA6	TSS1500	0.177859	0.014184	4.54238e-36	0.153499	0.0146419	1.02817e-25
cg15594967	6	55444079	F	HMGCLL1	TSS200	0.181675	0.0144893	4.59369e-36	0.146664	0.0154453	2.18826e-21
cg22720041	19	44952725	R	ZNF229	TSS200	0.177322	0.0141427	4.62109e-36	0.173589	0.0144194	2.22727e-33
cg14347199	9	91150537	F	NXNL2	1stExon	0.1969	0.0157051	4.66389e-36	0.142751	0.016226	1.3964e-18
cg06973234	18	28681689	R	DSC2	Body	0.178947	0.0142732	4.67141e-36	0.11597	0.0146453	2.40268e-15
cg19811761	19	57019022	F	ZNF471	TSS200	0.176854	0.0141075	4.73498e-36	0.147301	0.0140802	1.29684e-25
cg25517810	2	105474385	R			0.174988	0.0139587	4.73896e-36	0.151577	0.0140089	2.76715e-27
cg09983897	16	31483285	R	TGFB1I1	TSS1500	0.190185	0.0151715	4.76205e-36	0.127042	0.0152843	9.41822e-17
cg04612444	8	57358713	R	PENK	5'UTR	0.196157	0.015648	4.76409e-36	0.159155	0.015663	2.95467e-24
cg13321077	2	220196755	R	RESP18	Body	0.183612	0.0146473	4.76905e-36	0.129222	0.0150466	8.84064e-18
cg00123055	8	55370951	F	SOX17	1stExon	0.174555	0.0139259	4.83026e-36	0.13146	0.0144677	1.02376e-19
cg13321967	4	53617679	F			0.18311	0.0146098	4.90458e-36	0.130035	0.0147428	1.14213e-18
cg07772660	1	17085863	F	MST1P9	Body	0.210736	0.0168143	4.91522e-36	0.181725	0.0172099	4.59779e-26
cg05236677	8	99952217	R			0.198209	0.0158152	4.93654e-36	0.156761	0.0165989	3.58668e-21
cg06829686	1	47910843	F			0.206379	0.0164686	5.00961e-36	0.206539	0.0164513	3.75101e-36
cg21632158	6	29521356	R			0.206739	0.0165007	5.17496e-36	0.134051	0.0171985	6.47535e-15
cg08120263	14	29236013	R	FOXG1	TSS1500	0.163093	0.0130172	5.18003e-36	0.127756	0.013159	2.76935e-22
cg18096962	5	72526232	R			0.151813	0.0121176	5.22739e-36	0.134029	0.0122186	5.37319e-28
cg11905007	3	62861071	R	CADPS	TSS200	0.189204	0.0151021	5.22783e-36	0.173084	0.0151978	4.76059e-30
cg25527090	10	118894180	F	VAX1	Body	0.175481	0.0140068	5.23027e-36	0.159033	0.0139076	2.79476e-30
cg24144083	3	36805814	R			0.209174	0.0166966	5.25216e-36	0.145234	0.017176	2.77538e-17
cg17408527	19	58629967	R	ZSCAN18	TSS200	0.193985	0.0154866	5.38139e-36	0.152157	0.0164384	2.1177e-20
cg26674943	15	76627788	F	ISL2	TSS1500	0.195995	0.0156546	5.80618e-36	0.133574	0.0161503	1.33196e-16
cg04684267	19	58694502	R	ZNF274	1stExon	0.191339	0.0152837	5.86931e-36	0.143818	0.0154646	1.40673e-20
cg05344066	17	79285955	F	TMEM105	3'UTR	-0.178913	0.0142914	5.88477e-36	-0.147777	0.0143093	5.30015e-25
cg04328477	16	68270258	F	ESRP2	TSS200	0.197748	0.0157986	6.0437e-36	0.173849	0.016331	1.83334e-26
cg02831267	17	11143597	R	SHISA6	TSS1500	0.193698	0.0154758	6.09045e-36	0.144081	0.0156212	2.87691e-20
cg22147660	18	5895006	R			0.181888	0.0145353	6.29495e-36	0.157292	0.0146714	8.11186e-27
cg12204732	10	128994605	F	DOCK1	Body	0.186785	0.0149283	6.40769e-36	0.132734	0.0154189	7.39968e-18
cg14131273	9	135464095	F	BARHL1	Body	0.179977	0.014387	6.60871e-36	0.163144	0.0152768	1.27342e-26
cg18301583	19	53635967	F	ZNF415	5'UTR	0.179397	0.014342	6.70821e-36	0.11592	0.0149133	7.67129e-15
cg16762684	18	74820493	F	MBP	5'UTR	-0.218058	0.0174329	6.71212e-36	-0.217565	0.0181476	4.07606e-33
cg27603796	7	117512803	R	CTTNBP2	Body	0.168411	0.0134651	6.82216e-36	0.12219	0.013886	1.37408e-18
cg10542584	3	62356223	F	FEZF2	Body	0.182124	0.0145619	6.84381e-36	0.151337	0.0149071	3.24579e-24
cg01758512	6	96463902	R	FUT9	5'UTR	0.182867	0.014623	6.97281e-36	0.125159	0.0150472	8.96411e-17
cg12934382	3	51741135	F	GRM2	1stExon	0.222948	0.0178292	7.03655e-36	0.231652	0.0182037	4.26735e-37
cg25302957	6	17282284	F	RBM24	TSS1500	0.17857	0.0142807	7.07146e-36	0.128676	0.0146002	1.21516e-18
cg03599078	10	8078314	R			0.174823	0.0139816	7.11645e-36	0.157118	0.0145882	4.76247e-27
cg25140188	X	31087348	F			-0.237818	0.0190202	7.14846e-36	-0.248562	0.0191625	1.78031e-38
cg17486097	8	35093411	R	UNC5D	Body	0.173082	0.0138448	7.31755e-36	0.137861	0.0139943	6.77167e-23
cg26727693	12	63544175	F	AVPR1A	1stExon	0.202842	0.0162257	7.34356e-36	0.15229	0.0164586	2.1846e-20
cg02681442	14	29236008	R	FOXG1	TSS1500	0.165461	0.0132359	7.37511e-36	0.136296	0.0133671	2.05831e-24
cg16770368	11	6673784	F	DCHS1	5'UTR	-0.213887	0.0171118	7.52025e-36	-0.166159	0.0169367	1.01407e-22
cg24132481	17	2658712	R			0.168965	0.0135196	7.67573e-36	0.142121	0.0135751	1.19576e-25
cg00800512	19	58095518	F	ZIK1	TSS200	0.183413	0.0146762	7.71691e-36	0.170042	0.0153156	1.21915e-28
cg06644553	5	115297723	R	LVRN	TSS1500	0.198549	0.0158874	7.72537e-36	0.180654	0.0165041	6.94457e-28
cg02987928	1	16553456	R			0.174553	0.0139721	8.15739e-36	0.136623	0.0144439	3.11344e-21
cg01101873	1	3269478	R	PRDM16	Body	-0.185497	0.0148495	8.27712e-36	-0.172028	0.0151658	8.02017e-30
cg04334016	6	154769781	R	CNKSR3	Body	-0.206948	0.0165676	8.34102e-36	-0.247734	0.0171534	2.80367e-47
cg18932726	10	128594141	R	DOCK1	Body	0.198044	0.0158563	8.47284e-36	0.136439	0.0162985	5.69986e-17
cg22830707	12	54332181	R	HOXC13	TSS1500	0.1891	0.0151418	8.61234e-36	0.149303	0.015055	3.50483e-23
cg17656260	19	37329666	R	ZNF790	TSS1500	0.17677	0.0141546	8.62687e-36	0.119392	0.0147627	6.09541e-16
cg03793270	11	89224684	F	NOX4	5'UTR	0.15195	0.0121691	8.84231e-36	0.134194	0.0121271	1.84195e-28
cg12951849	18	11148932	R	FAM38B	TSS200	0.190514	0.0152578	8.86137e-36	0.140284	0.0158784	1.00186e-18
cg18628371	14	24641189	R	REC8	TSS200	0.209931	0.0168132	8.8943e-36	0.164865	0.0175473	5.69591e-21
cg23130131	4	111544299	R	PITX2	Body	0.18219	0.0145915	8.89643e-36	0.159636	0.0149553	1.34399e-26
cg00107772	14	57261886	F			0.197603	0.0158286	9.13404e-36	0.140137	0.0163218	9.01328e-18
cg12350474	17	46578476	F			-0.191306	0.0153246	9.17457e-36	-0.226347	0.0158647	3.49552e-46
cg03992259	2	134024418	R	NCKAP5	Body	0.172183	0.013793	9.19943e-36	0.136149	0.0140483	3.27614e-22
cg18273840	5	45695643	R	HCN1	Body	0.175004	0.014019	9.2034e-36	0.146237	0.0142687	1.19836e-24
cg19761273	17	80232096	F	CSNK1D	TSS1500	-0.218599	0.0175131	9.35523e-36	-0.249274	0.0182861	2.58793e-42
cg12166610	8	31498256	R	NRG1	Body	0.182268	0.0146027	9.38091e-36	0.156527	0.0142829	6.01005e-28
cg22367191	6	10425648	R			0.168503	0.0135005	9.45917e-36	0.139855	0.0135543	5.83494e-25
cg24275315	4	85417312	R	NKX6-1	Body	0.173138	0.0138722	9.48276e-36	0.142586	0.0141167	5.49361e-24
cg13283952	2	121412005	F			0.195033	0.015627	9.54318e-36	0.148737	0.0161425	3.14221e-20
cg19925849	19	54445377	F	CACNG7	Body	0.192232	0.0154051	9.78935e-36	0.137547	0.0158124	3.35849e-18
cg22934295	3	42306385	R	CCK	1stExon	0.218592	0.0175177	9.79761e-36	0.204705	0.0177131	6.82513e-31
cg22793142	1	207995752	F	LOC148696	Body	-0.223525	0.017914	9.88367e-36	-0.21508	0.0164698	5.6443e-39
cg24783211	4	55093038	R			0.169638	0.0135967	1.00396e-35	0.14973	0.0136019	3.49828e-28
cg10039299	2	96192273	F			0.202399	0.0162237	1.01549e-35	0.204774	0.0164958	2.20199e-35
cg22871668	6	133562492	F	EYA4	TSS200	0.186749	0.0149706	1.03017e-35	0.125508	0.015523	6.20081e-16
cg04464276	16	68481049	F	SMPD3	5'UTR	0.187063	0.0149974	1.04767e-35	0.147775	0.0156833	4.40747e-21
cg04415176	2	176957842	F	HOXD13	1stExon	0.201715	0.0161722	1.04806e-35	0.175544	0.0164802	1.70953e-26
cg23737927	12	5149153	F			-0.206258	0.0165368	1.05245e-35	-0.224088	0.0169272	5.26802e-40
cg18115406	9	129376723	F	LMX1B	TSS200	0.189452	0.0151914	1.07488e-35	0.148106	0.015495	1.1964e-21
cg22836229	8	49647717	R	EFCAB1	5'UTR	0.185792	0.0149027	1.13053e-35	0.125306	0.0154652	5.38767e-16
cg08475096	4	158143750	F	GRIA2	Body	0.165094	0.0132432	1.13929e-35	0.148396	0.0134324	2.25075e-28
cg06288154	2	130737494	F	RAB6C	5'UTR	0.195181	0.0156575	1.14953e-35	0.180467	0.0161745	6.58177e-29
cg16898239	17	74070682	R	GALR2	TSS1500	0.201167	0.016139	1.16328e-35	0.133784	0.0171939	7.20152e-15
cg15538070	5	174162713	R			0.186738	0.0149818	1.16874e-35	0.137283	0.0151548	1.31985e-19
cg16491617	8	54164391	F	OPRK1	TSS200	0.186171	0.0149373	1.18037e-35	0.138685	0.0153014	1.26235e-19
cg25439632	8	49892209	F			-0.192927	0.0154793	1.1806e-35	-0.185309	0.0159489	3.30152e-31
cg02189888	19	46582065	R			0.201977	0.0162083	1.21302e-35	0.215389	0.016087	7.01401e-41
cg01133215	6	45399681	F	RUNX2	Body	0.176256	0.0141449	1.22255e-35	0.151991	0.0139799	1.56438e-27
cg00238349	3	52187791	R	WDR51A	Body	-0.226354	0.0181681	1.2507e-35	-0.179331	0.0189608	3.13965e-21
cg12127472	17	42733724	R	C17orf104	TSS200	0.218045	0.0175016	1.2557e-35	0.222925	0.0179346	1.79852e-35
cg13021841	2	14774902	R	FAM84A	Body	0.174188	0.0139829	1.27772e-35	0.127305	0.0143278	6.38243e-19
cg02741521	3	9745610	F	CPNE9	1stExon	0.185185	0.0148657	1.27781e-35	0.160036	0.0152413	8.62412e-26
cg03355526	5	178368415	F	ZNF454	5'UTR	0.174591	0.0140162	1.29103e-35	0.128887	0.0145247	7.08287e-19
cg01342746	4	44449571	F	KCTD8	Body	0.194456	0.0156116	1.29872e-35	0.130923	0.0162866	9.08026e-16
cg02593932	2	154728308	F	GALNT13	TSS200	0.155249	0.0124648	1.31311e-35	0.115732	0.0125746	3.46043e-20
cg03260566	4	20256841	F	SLIT2	Body	0.197963	0.0158953	1.32719e-35	0.144298	0.0163182	9.33495e-19
cg02446647	6	133562101	R	EYA4	TSS1500	0.171538	0.0137757	1.36022e-35	0.128892	0.0137616	7.53042e-21
cg02509825	8	56015399	R	XKR4	1stExon	0.197424	0.0158546	1.36084e-35	0.163067	0.0161345	5.15884e-24
cg10137084	3	54156330	R	CACNA2D3	TSS1500	0.204948	0.0164597	1.37174e-35	0.161681	0.0170781	2.87463e-21
cg17210929	1	17034180	F	ESPNP	Body	0.208409	0.0167381	1.37835e-35	0.130566	0.0165628	3.19398e-15
cg18091264	15	66795595	R	SNORD18A	Body	-0.194263	0.0156022	1.38129e-35	-0.144754	0.0149559	3.71406e-22
cg27346707	5	126626348	R	MEGF10	TSS200	0.164406	0.0132054	1.40062e-35	0.140717	0.0133402	5.17001e-26
cg03117976	18	11149435	F	FAM38B	TSS1500	0.195945	0.0157389	1.4033e-35	0.149181	0.0159986	1.11384e-20
cg00277397	7	71800412	R	CALN1	5'UTR	-0.199168	0.0159981	1.40818e-35	-0.222344	0.0160898	1.95941e-43
cg02391713	6	105400985	R			0.211598	0.0169969	1.41291e-35	0.198251	0.0175183	1.0839e-29
cg12781700	17	42733729	R	C17orf104	TSS200	0.220794	0.0177366	1.42552e-35	0.230709	0.0181625	5.72724e-37
cg20676716	2	177053568	R	HOXD1	1stExon	0.201586	0.0161942	1.4327e-35	0.122276	0.0166432	2.029e-13
cg14606067	22	18593816	F	TUBA8	Body	0.181744	0.0146005	1.43811e-35	0.127314	0.0149539	1.68387e-17
cg12079303	1	61547163	R	NFIA	Body	-0.20888	0.0167812	1.44701e-35	-0.198986	0.0167521	1.53389e-32
cg20491914	2	26915349	R	KCNK3	TSS1500	0.21888	0.0175859	1.46346e-35	0.191564	0.0183499	1.63621e-25
cg05571581	6	28753940	R			0.192285	0.015452	1.50723e-35	0.151199	0.0151398	1.74025e-23
cg23883696	18	70534298	R	NETO1	TSS1500	0.183086	0.0147136	1.52067e-35	0.111333	0.0154267	5.31771e-13
cg23833452	6	146864752	R	RAB32	TSS200	0.190534	0.0153123	1.52268e-35	0.140143	0.016046	2.46275e-18
cg05491001	4	62066539	F			0.191165	0.0153638	1.53515e-35	0.146755	0.0157453	1.15732e-20
cg26872137	8	35092870	F	UNC5D	TSS200	0.176295	0.0141689	1.53803e-35	0.134527	0.014319	5.71966e-21
cg23944251	10	25464719	F	LOC100128811	Body	0.180698	0.014525	1.57469e-35	0.178322	0.0146313	3.61389e-34
cg17835606	15	48839797	F	FBN1	Body	-0.224278	0.0180299	1.59984e-35	-0.207772	0.0183633	1.11168e-29
cg14295611	9	136876366	R			-0.224626	0.0180585	1.60821e-35	-0.182587	0.0186885	1.51431e-22
cg07178825	1	3649574	F	TP73	Body	0.228251	0.0183503	1.61388e-35	0.193551	0.0190034	2.31227e-24
cg00906973	6	10419835	R	TFAP2A	TSS200	0.174033	0.0139936	1.65315e-35	0.11631	0.014361	5.53972e-16
cg13900817	5	172070153	F	NEURL1B	Body	-0.195219	0.0156973	1.65544e-35	-0.174772	0.0164646	2.53728e-26
cg04826368	6	27130208	F			-0.208275	0.0167486	1.68024e-35	-0.168587	0.0173944	3.25842e-22
cg10795666	13	49794635	R	MLNR	1stExon	0.218459	0.0175688	1.69792e-35	0.196588	0.0178778	3.98568e-28
cg11097433	10	108924557	R	SORCS1	TSS1500	0.192735	0.0155009	1.71216e-35	0.165904	0.0158616	1.32624e-25
cg19792599	11	125774406	R	DDX25	5'UTR	0.186396	0.0149957	1.79807e-35	0.171881	0.0147585	2.39805e-31
cg10056132	10	50887731	R	C10orf53	5'UTR	0.201095	0.0161785	1.801e-35	0.154934	0.0165306	7.08006e-21
cg00184376	13	28499045	F	PDX1	3'UTR	0.199205	0.0160277	1.82322e-35	0.172289	0.0163003	4.11644e-26
cg05915866	16	73090838	R	ZFHX3	5'UTR	-0.236053	0.0189986	1.91761e-35	-0.185287	0.0197632	6.89359e-21
cg13368756	5	11904127	R	CTNND2	TSS200	0.20472	0.0164774	1.92875e-35	0.184636	0.0169121	9.51786e-28
cg27176138	13	96743087	F	HS6ST3	TSS200	0.193057	0.0155397	1.94921e-35	0.159959	0.0161881	5.02093e-23
cg11014740	2	129079223	F			-0.21032	0.0169294	1.95187e-35	-0.187219	0.0167448	5.06573e-29
cg20818778	1	235814145	F	GNG4	TSS1500	0.204114	0.0164299	1.95363e-35	0.196478	0.0168244	1.64798e-31
cg12363903	5	134526269	F			-0.195253	0.0157179	1.97625e-35	-0.173879	0.0162697	1.16697e-26
cg21406967	7	100464553	R	TRIP6	TSS1500	-0.197238	0.0158782	1.98654e-35	-0.181835	0.0163638	1.09691e-28
cg21901277	2	132152297	R			0.183395	0.0147646	2.00472e-35	0.159024	0.0152999	2.64635e-25
cg10286380	19	51171847	F	SHANK1	Body	0.186657	0.0150273	2.00599e-35	0.125734	0.0158678	2.30189e-15
cg16700282	17	46796298	F			0.206711	0.0166458	2.08214e-35	0.206725	0.0168146	9.70656e-35
cg13016524	11	16628944	F			0.168004	0.0135293	2.09153e-35	0.129695	0.0135075	7.8655e-22
cg00081324	17	48201233	F	SAMD14	Body	-0.221326	0.0178287	2.19294e-35	-0.173099	0.0185924	1.27581e-20
cg11291003	5	134526241	F			-0.20633	0.016621	2.19929e-35	-0.182147	0.0168524	3.14175e-27
cg22489321	13	100643388	F			0.176553	0.0142234	2.22537e-35	0.12292	0.0147674	8.523e-17
cg02849693	19	54402455	R	PRKCG	Body	0.192479	0.0155096	2.29772e-35	0.141847	0.015753	2.16733e-19
cg25985583	7	26404716	R	SNX10	Body	-0.168315	0.013563	2.30955e-35	-0.13971	0.0138067	4.55066e-24
cg27314569	11	122852461	R	BSX	TSS200	0.214498	0.0172912	2.45467e-35	0.187926	0.018096	2.90444e-25
cg19863655	13	31480663	R	C13orf33	1stExon	0.229988	0.0185404	2.46355e-35	0.191659	0.0190359	7.62935e-24
cg07173635	9	971480	R			0.202127	0.016295	2.47898e-35	0.176702	0.0162788	1.89275e-27
cg24221541	19	46974662	R	PNMAL1	1stExon	0.19711	0.0158909	2.48802e-35	0.144275	0.0164352	1.65774e-18
cg07915921	12	54321502	F			0.198171	0.0159781	2.52922e-35	0.144178	0.0163014	9.19625e-19
cg10530851	14	37051417	F	NKX2-8	Body	0.182095	0.014682	2.53025e-35	0.119278	0.014775	6.85937e-16
cg20303399	8	26722965	R	ADRA1A	TSS200	0.19087	0.0153907	2.55803e-35	0.179165	0.0154928	6.24353e-31
cg08065657	19	52223099	R	HAS1	Body	0.200555	0.0161721	2.56998e-35	0.146723	0.0162778	1.99287e-19
cg23998119	14	77600217	R	ZDHHC22	Body	0.223668	0.0180365	2.58626e-35	0.196131	0.0180921	2.20765e-27
cg15416877	6	108492769	F	NR2E1	Body	0.173497	0.0139908	2.58752e-35	0.15467	0.0146683	5.388e-26
cg04299080	1	38274753	R	C1orf122	3'UTR	-0.181328	0.0146233	2.61632e-35	-0.203505	0.0151278	2.98249e-41
cg11076306	4	41430667	F	LIMCH1	Body	-0.229157	0.0184809	2.62453e-35	-0.232376	0.0188262	5.29785e-35
cg13009111	11	71350975	F			0.184778	0.0149023	2.63574e-35	0.149514	0.014989	1.96274e-23
cg14385245	15	83953765	R	BNC1	TSS1500	0.213378	0.0172093	2.64592e-35	0.157061	0.0173539	1.4237e-19
cg12595013	3	147128123	F	ZIC1	1stExon	0.176835	0.0142633	2.68185e-35	0.151518	0.01477	1.08434e-24
cg19864758	20	17206720	F	PCSK2	TSS1500	0.179245	0.0144577	2.68431e-35	0.147349	0.0147301	1.4755e-23
cg03730428	11	32009004	F			0.199757	0.0161125	2.69321e-35	0.148768	0.016685	4.82137e-19
cg07060233	20	44687092	R	SLC12A5	3'UTR	0.164495	0.0132693	2.7257e-35	0.118504	0.0135832	2.67867e-18
cg24446586	7	27225078	R	HOXA11AS	Body	0.181984	0.0146812	2.75519e-35	0.134614	0.0143755	7.66775e-21
cg24369989	15	78933807	R	CHRNB4	TSS1500	0.202774	0.0163587	2.76586e-35	0.208685	0.0166784	6.39377e-36
cg24125828	6	32117049	R	PRRT1	Body	0.2303	0.0185819	2.82403e-35	0.257572	0.0188335	1.40689e-42
cg00251125	1	228395450	F	OBSCN	TSS1500	-0.229898	0.0185528	2.90351e-35	-0.226993	0.0188516	2.16151e-33
cg16086559	15	96911531	R			0.166727	0.0134559	2.93743e-35	0.125006	0.0139549	3.31185e-19
cg15406010	6	108478650	R			0.197433	0.0159361	2.99558e-35	0.142408	0.0166627	1.26876e-17
cg16783744	8	105478855	R	DPYS	Body	0.1926	0.0155463	3.00512e-35	0.143477	0.0160942	4.88583e-19
cg04006143	4	140217312	R	NDUFC1	TSS1500	-0.223281	0.0180238	3.02924e-35	-0.244012	0.0180752	1.56732e-41
cg00911794	17	1962132	F	HIC1	3'UTR	0.185049	0.0149408	3.13065e-35	0.108505	0.0158381	7.33948e-12
cg12483947	10	72640100	R	SGPL1	3'UTR	-0.228131	0.0184209	3.17519e-35	-0.233068	0.0187711	2.13118e-35
cg03593550	19	54485404	F	CACNG8	Body	0.19701	0.0159101	3.24377e-35	0.194458	0.0164832	4.02975e-32
cg13669432	9	126943462	F			-0.205089	0.0165632	3.26103e-35	-0.167684	0.0164374	1.95508e-24
cg14168923	13	28366606	F	GSX1	TSS200	0.196399	0.0158631	3.31761e-35	0.16563	0.0156013	2.50091e-26
cg03340466	1	179712740	F	FAM163A	5'UTR	0.201272	0.0162567	3.31868e-35	0.141099	0.0165725	1.67932e-17
cg25146557	2	207507421	F	LOC200726	5'UTR	0.174099	0.0140621	3.32237e-35	0.129226	0.0143836	2.60537e-19
cg13472192	1	41350014	R			0.207976	0.016799	3.34412e-35	0.141919	0.0176379	8.53554e-16
cg21301148	14	23878195	R	MYH6	TSS1500	-0.17091	0.0138056	3.36393e-35	-0.166218	0.0131455	1.19971e-36
cg17722002	7	121940381	F			0.184817	0.0149306	3.42027e-35	0.114934	0.0156135	1.82285e-13
cg00553487	19	42570406	R	GRIK5	TSS1500	-0.219384	0.0177259	3.50453e-35	-0.192715	0.0181254	2.10707e-26
cg13806070	1	39957390	F	BMP8A	1stExon	0.217603	0.0175821	3.50616e-35	0.1951	0.0185387	6.70326e-26
cg06662812	2	108603466	F	SLC5A7	5'UTR	0.166455	0.0134501	3.53585e-35	0.132812	0.0131413	5.17113e-24
cg21091227	18	4454304	R			0.180018	0.0145467	3.56294e-35	0.16901	0.0145443	3.24641e-31
cg05904135	10	134599372	F	NKX6-2	1stExon	0.20067	0.0162165	3.59503e-35	0.151387	0.0168178	2.22369e-19
cg05139788	6	50690647	R	TFAP2D	Body	0.177577	0.0143504	3.59787e-35	0.152601	0.0145065	7.02724e-26
cg21552653	19	57079146	F	ZNF470	1stExon	0.178014	0.0143866	3.63144e-35	0.149936	0.0149221	9.38313e-24
cg22870429	3	114027859	R	TIGIT	3'UTR	-0.163382	0.0132043	3.63857e-35	-0.162134	0.0129446	5.43626e-36
cg03701992	21	40984886	R	C21orf88	TSS200	0.177221	0.0143232	3.65997e-35	0.14038	0.0145749	5.8785e-22
cg12071888	1	91195159	R			0.185289	0.0149795	3.82287e-35	0.149765	0.0158256	2.97923e-21
cg24298421	1	10856943	F	CASZ1	TSS1500	0.179832	0.0145384	3.82518e-35	0.135262	0.0147759	5.47485e-20
cg08754967	10	736083	F	DIP2C	TSS1500	0.178542	0.0144343	3.83512e-35	0.150551	0.0147734	2.18377e-24
cg15037004	5	71803938	R	ZNF366	TSS1500	-0.208195	0.0168344	3.93019e-35	-0.19299	0.017733	1.38712e-27
cg01852585	4	106817015	R	NPNT	Body	0.188684	0.0152581	3.98517e-35	0.187593	0.0156496	4.15133e-33
cg15811515	16	31580989	F	CSDAP1	TSS200	0.189188	0.0153006	4.05507e-35	0.147259	0.0154618	1.66588e-21
cg23805357	10	25464139	F	LOC100128811	Body	0.181737	0.014698	4.05606e-35	0.16233	0.0150618	4.39097e-27
cg22484737	7	115117568	R			0.168782	0.0136503	4.05623e-35	0.127706	0.0143769	6.52419e-19
cg07536910	2	176948105	R	EVX2	1stExon	0.183948	0.0148789	4.14225e-35	0.172217	0.0152631	1.58842e-29
cg16020747	8	85095394	R	RALYL	TSS200	0.189198	0.0153051	4.2101e-35	0.144681	0.0157074	3.23197e-20
cg14871932	7	44185323	R	GCK	Body	0.210118	0.0169979	4.22723e-35	0.169115	0.0171347	5.63194e-23
cg05646686	14	33402368	F			0.166368	0.0134602	4.30442e-35	0.135225	0.0137108	6.04437e-23
cg10649903	5	140181058	R	PCDHA2	Body	0.183274	0.0148284	4.31726e-35	0.167691	0.0144699	4.68819e-31
cg03070297	10	128994603	F	DOCK1	Body	0.185245	0.0149879	4.31952e-35	0.154671	0.0152106	2.73878e-24
cg00029246	7	137223417	F	DGKI	Body	-0.22127	0.0179042	4.3813e-35	-0.191031	0.0185161	5.9026e-25
cg26575914	1	228397977	F	OBSCN	5'UTR	-0.207353	0.0167827	4.56686e-35	-0.187101	0.017343	3.91072e-27
cg01713950	1	17766995	F	RCC2	TSS1500	-0.223846	0.0181201	4.66525e-35	-0.22533	0.0185891	8.11404e-34
cg14704921	4	53728654	F	RASL11B	1stExon	0.210093	0.017008	4.71729e-35	0.197235	0.0166286	1.88206e-32
cg10387551	11	30038615	R	KCNA4	TSS200	0.182187	0.0147529	4.91674e-35	0.154175	0.0150362	1.13956e-24
cg09979478	8	145925997	R			0.19164	0.01552	4.99928e-35	0.14898	0.0154489	5.23953e-22
cg11616547	6	28782301	F			0.193406	0.0156634	5.01448e-35	0.153639	0.0157409	1.66327e-22
cg11719362	7	25900355	F			0.198001	0.0160365	5.06026e-35	0.0964133	0.0168443	1.04174e-08
cg02344833	19	58545285	R	ZSCAN1	TSS200	0.194424	0.015747	5.07272e-35	0.1683	0.0163593	8.00559e-25
cg00970396	16	9107199	R			0.182537	0.0147846	5.09487e-35	0.150823	0.015548	3.00123e-22
cg00376544	17	6679348	F	FBXO39	TSS1500	0.191133	0.0154812	5.11006e-35	0.135135	0.0158021	1.21248e-17
cg23712342	10	60936794	F	PHYHIPL	Body	0.168011	0.0136092	5.16147e-35	0.136317	0.0135525	8.42888e-24
cg16587616	6	62996022	F	KHDRBS2	1stExon	0.171153	0.0138655	5.26212e-35	0.133433	0.0151279	1.14084e-18
cg00058879	22	40082173	F	CACNA1I	Body	0.220948	0.0179	5.28206e-35	0.167893	0.0186966	2.71066e-19
cg08927006	10	100993556	R	HPSE2	Body	0.162269	0.0131464	5.29637e-35	0.153911	0.0135895	9.78294e-30
cg13066481	3	123372199	R	MYLK	Body	-0.202437	0.0164018	5.35897e-35	-0.222331	0.0173547	1.42323e-37
cg16581455	8	94857684	R			-0.200593	0.0162526	5.36423e-35	-0.152801	0.0170637	3.40518e-19
cg13563725	15	27212911	R			0.202434	0.0164018	5.36833e-35	0.174029	0.0162515	9.28643e-27
cg11581706	7	82072141	F	CACNA2D1	Body	0.179116	0.0145136	5.42939e-35	0.135974	0.0151964	3.62742e-19
cg03602280	18	11148914	R	FAM38B	TSS200	0.19387	0.0157098	5.4696e-35	0.148507	0.0160716	2.45736e-20
cg19237294	18	35065236	F	BRUNOL4	Body	0.203133	0.0164615	5.52317e-35	0.165274	0.0168217	8.78782e-23
cg01227537	3	147127012	R	ZIC1	TSS200	0.173335	0.0140489	5.65594e-35	0.139085	0.0143949	4.36873e-22
cg12739664	17	65990817	R	C17orf58	TSS1500	-0.220488	0.0178708	5.66165e-35	-0.160274	0.0188312	1.72315e-17
cg26267340	8	31497829	R	NRG1	1stExon	0.190265	0.0154223	5.72212e-35	0.154147	0.0161032	1.04392e-21
cg23065934	5	16180266	R	2011-03-01	TSS1500	0.194371	0.0157565	5.80537e-35	0.190782	0.015907	3.84068e-33
cg06931612	1	856914	F			-0.202557	0.0164207	5.83672e-35	-0.191816	0.0173087	1.53353e-28
cg13895765	2	66803345	F			0.160778	0.0130346	5.88865e-35	0.126879	0.0133923	2.69151e-21
cg12483476	5	178421711	F	GRM6	1stExon	0.192608	0.0156158	5.92504e-35	0.137933	0.016006	6.83848e-18
cg16361966	10	124905786	F			0.181629	0.0147264	5.97769e-35	0.14847	0.0149857	3.86204e-23
cg20119745	6	30039239	F	RNF39	Body	0.209268	0.0169681	6.0147e-35	0.155523	0.0177528	1.9445e-18
cg18371475	5	2751550	R	IRX2	1stExon	0.191136	0.0154981	6.0278e-35	0.138694	0.015907	2.80453e-18
cg25147376	1	166890293	R	ILDR2	Body	0.194883	0.0158022	6.03997e-35	0.163769	0.0166672	8.71153e-23
cg18186343	14	101317620	R	MIR770	TSS1500	-0.213133	0.0172823	6.05661e-35	-0.215155	0.0177655	9.25877e-34
cg07766263	3	170303045	R	SLC7A14	5'UTR	0.168202	0.0136417	6.24505e-35	0.143601	0.0139828	9.64067e-25
cg07201620	5	83679941	F	EDIL3	Body	0.192558	0.0156181	6.31065e-35	0.1442	0.0157577	5.63465e-20
cg26614073	3	47517819	R	SCAP	TSS1500	-0.23335	0.0189301	6.48949e-35	-0.241539	0.0193643	1.04201e-35
cg08194879	6	123317569	R	CLVS2	TSS200	0.192773	0.0156386	6.49835e-35	0.145915	0.0161969	2.08243e-19
cg27513935	13	28552610	R	PRHOXNB	Body	0.174284	0.0141393	6.54187e-35	0.118379	0.0151483	5.50994e-15
cg07519816	18	53447596	F			0.192366	0.0156076	6.63208e-35	0.146302	0.0164836	6.95621e-19
cg16248329	4	187644739	F	FAT1	5'UTR	0.194393	0.0157738	6.74107e-35	0.138081	0.0160228	6.8248e-18
cg24189904	19	9473781	R	ZNF177	5'UTR	0.202386	0.0164227	6.76613e-35	0.133286	0.016985	4.25324e-15
cg02165355	5	178368071	F	ZNF454	TSS200	0.181419	0.0147226	6.85517e-35	0.12918	0.015295	3.01771e-17
cg02352281	3	46139305	R			-0.175759	0.0142644	6.93735e-35	-0.190145	0.0150122	9.12161e-37
cg24921858	12	12223989	R	BCL2L14	5'UTR	-0.174719	0.0141812	7.03091e-35	-0.173555	0.0135171	9.82887e-38
cg11294513	19	58220295	F	ZNF154	Body	0.218364	0.0177246	7.08668e-35	0.207299	0.0181551	3.39255e-30
cg14614094	9	133567903	F	EXOSC2	TSS1500	0.199929	0.0162297	7.18607e-35	0.217166	0.0167623	2.1852e-38
cg16454902	16	27414272	R	IL21R	TSS200	-0.203588	0.0165273	7.2202e-35	-0.227769	0.01682	8.88371e-42
cg05196969	15	76627594	F			0.193011	0.0156692	7.26028e-35	0.15965	0.0161023	3.59289e-23
cg09302895	2	237077311	R	GBX2	TSS1500	0.190678	0.01548	7.27564e-35	0.153503	0.0155484	5.47434e-23
cg02008154	7	35293537	F	TBX20	1stExon	0.193335	0.0156961	7.30532e-35	0.173474	0.0161045	4.68006e-27
cg24350475	10	30316933	R	KIAA1462	Body	-0.216725	0.0175952	7.31455e-35	-0.220256	0.017469	1.89824e-36
cg16735881	13	36045352	F	NBEA	Body	0.189603	0.0153944	7.39298e-35	0.153324	0.0159848	8.65102e-22
cg15662768	20	60795818	F	HRH3	TSS1500	0.197417	0.0160306	7.52488e-35	0.157782	0.0163247	4.23667e-22
cg03173570	21	33031392	R	SOD1	TSS1500	-0.199878	0.0162318	7.61477e-35	-0.19826	0.0164904	2.69755e-33
cg16768018	3	147108843	R	ZIC4	Body	0.182687	0.014838	7.79625e-35	0.153739	0.0155194	3.91145e-23
cg18181196	1	217308156	F	ESRRG	5'UTR	0.186495	0.0151481	7.86086e-35	0.145792	0.0153794	2.55086e-21
cg02226810	6	1605352	F			0.176416	0.014331	7.98908e-35	0.119498	0.0147179	4.69271e-16
cg23208513	8	101118377	R	RGS22	TSS200	0.197806	0.0160708	8.15964e-35	0.141003	0.0165889	1.89912e-17
cg03420881	2	130763516	F			0.201611	0.0163818	8.30523e-35	0.168386	0.0165728	2.97961e-24
cg00266920	18	55021277	R	ST8SIA3	Body	0.190478	0.015478	8.36742e-35	0.183689	0.0155019	2.16545e-32
cg05471730	2	230135748	F	PID1	5'UTR	0.203217	0.0165141	8.44317e-35	0.140792	0.0166414	2.6665e-17
cg17368808	20	9496892	F	C20orf103	Body	0.171452	0.0139383	8.97416e-35	0.150746	0.0144927	2.44088e-25
cg22358580	12	54426725	R	HOXC4	5'UTR	0.217968	0.0177201	8.98697e-35	0.193606	0.0179587	4.24916e-27
cg05168977	7	98247142	F	NPTX2	1stExon	0.189136	0.0153767	9.04151e-35	0.142184	0.0157509	1.76303e-19
cg03323696	5	59189120	R	PDE4D	Body	0.182342	0.0148245	9.04891e-35	0.159494	0.0149848	1.86622e-26
cg11736940	1	155265026	F	PKLR	Body	0.193541	0.0157374	9.26938e-35	0.139031	0.0159509	2.87829e-18
cg27219955	15	89377583	F	ACAN	5'UTR	-0.204888	0.0166603	9.28787e-35	-0.215797	0.0170097	7.00787e-37
cg15415452	13	112759355	R			0.18275	0.0148638	9.63941e-35	0.139945	0.014924	6.77411e-21
cg25428494	4	84255411	F	HPSE	Body	-0.232668	0.018925	9.72757e-35	-0.232406	0.01955	1.37041e-32
cg15885337	11	132813819	F	OPCML	TSS1500	0.192305	0.015642	9.73383e-35	0.131786	0.0162895	5.95431e-16
cg26947626	8	72469430	R			0.186351	0.0151591	9.87249e-35	0.146466	0.0153348	1.28149e-21
cg04965050	22	43739790	F	SCUBE1	TSS1500	0.18284	0.0148741	9.93823e-35	0.135512	0.0162589	7.77558e-17
cg15415136	19	38042418	F	ZNF540	5'UTR	0.199162	0.0162019	9.9432e-35	0.172364	0.0163032	4.00215e-26
cg10084644	7	99775521	F	STAG3	TSS200	0.195522	0.0159061	9.96231e-35	0.154518	0.0165623	1.06368e-20
cg01610605	16	6069399	R	A2BP1	5'UTR	0.185062	0.0150561	1.00609e-34	0.117434	0.015477	3.25724e-14
cg23318063	14	58332751	F			0.184343	0.014998	1.00964e-34	0.16334	0.0152519	9.19136e-27
cg00824018	10	105037661	R	INA	1stExon	0.196717	0.016006	1.0225e-34	0.140907	0.0162842	5.01758e-18
cg24504569	20	24451428	F	TMEM90B	5'UTR	0.186886	0.0152083	1.04525e-34	0.112792	0.0153734	2.18733e-13
cg07121693	10	44148437	R			-0.170004	0.0138346	1.04609e-34	-0.12183	0.0131269	1.67953e-20
cg13882284	4	4859996	R	MSX1	TSS1500	0.183272	0.0149155	1.05872e-34	0.170203	0.0150683	1.38244e-29
cg02119363	3	179754603	R	PEX5L	TSS200	0.207212	0.0168656	1.07678e-34	0.163993	0.0172857	2.37306e-21
cg00594191	10	11755103	R			-0.233547	0.01901	1.08391e-34	-0.156864	0.0188002	7.1991e-17
cg24309428	11	89224381	R	NOX4	1stExon	0.168341	0.013704	1.10257e-34	0.128509	0.014109	8.36641e-20
cg09500672	2	150186706	F	LYPD6	TSS1500	0.182827	0.0148833	1.10406e-34	0.135754	0.0150619	2.00336e-19
cg14156751	10	50976571	F			0.179072	0.0145786	1.11482e-34	0.134998	0.0145602	1.83195e-20
cg03356595	16	51187807	F			0.175471	0.0142862	1.12361e-34	0.16767	0.0141777	2.85466e-32
cg23337382	4	22517965	F	GPR125	TSS1500	0.173679	0.0141408	1.13043e-34	0.141958	0.0146232	2.79598e-22
cg03738352	4	25657381	R	SLC34A2	TSS200	0.195769	0.0159397	1.13373e-34	0.155628	0.0163216	1.49715e-21
cg13665684	7	30840711	R	FAM188B	Body	-0.225518	0.0183628	1.14197e-34	-0.239095	0.0187038	2.03444e-37
cg18299835	19	13207445	F	NFIX	3'UTR	0.157546	0.0128285	1.14674e-34	0.114194	0.0132353	6.24541e-18
cg24259244	13	100624279	R	ZIC5	TSS200	0.182832	0.0148882	1.15556e-34	0.159579	0.0148495	6.16061e-27
cg19809499	1	47882265	F	FOXE3	1stExon	0.228005	0.0185687	1.17485e-34	0.204482	0.0187099	8.37221e-28
cg10595547	10	119310911	F			0.1819	0.0148149	1.18695e-34	0.164769	0.0154265	1.25092e-26
cg00736523	9	32783202	R	TMEM215	TSS1500	0.194453	0.0158383	1.1979e-34	0.132988	0.0160672	1.26329e-16
cg01602690	2	176987161	F	HOXD9	TSS1500	0.18069	0.0147175	1.20021e-34	0.115346	0.0150972	2.16881e-14
cg03873281	5	131608955	F	PDLIM4	3'UTR	-0.218051	0.0177618	1.21264e-34	-0.242869	0.0180307	2.35566e-41
cg06921011	10	102589467	R	PAX2	3'UTR	0.187744	0.0152931	1.21377e-34	0.126076	0.0161195	5.22842e-15
[truncated: 30,661 more rows]

## Sheet: Table S3
Table S3: 23,141 replicated sex-associated CpGs using the MCCS sample.
CpG	CHR	MAPINFO	Strand	Gene	Gene feature	Control_beta	Control_se	Control_P	Case_beta	Case_se	Case_P
cg00005617	X	68059898	R	EFNB1	Body	-1.87707	0.0226991	0	-1.88005	0.0232436	0
cg00006815	X	103810908	R	IL1RAPL2	TSS200	1.99205	0.0176967	0	1.97324	0.0179685	0
cg00008932	X	71498597	R	RPS4X	TSS1500	-1.641	0.0219203	0	-1.56474	0.0232042	0
cg00008945	X	80377379	F	HMGN5	5'UTR	2.01957	0.0141372	0	2.01482	0.0141698	0
cg00011200	X	48380234	R	EBP	1stExon	2.06999	0.0127777	0	2.05827	0.0126471	0
cg00011891	X	153714660	R	UBL4A	Body	2.11251	0.0106775	0	2.08641	0.010767	0
cg00016522	X	149737876	F	MTM1	5'UTR	2.09003	0.0141939	0	2.08094	0.0142062	0
cg00018261	X	117957689	F	ZCCHC12	TSS200	2.08616	0.0133319	0	2.06999	0.0131619	0
cg00021786	X	31090306	F	FTHL17	TSS200	-1.62103	0.0315465	0	-1.61835	0.03256	0
cg00026186	X	48367230	R	PORCN	TSS200	2.06048	0.0123083	0	2.04408	0.0123577	0
cg00029931	X	100645741	F	RPL36A	TSS1500	2.05619	0.0150503	0	2.03623	0.0149171	0
cg00031235	X	49124819	F	PPP1R3F	TSS1500	-1.70978	0.030355	0	-1.67124	0.0317358	0
cg00040455	X	30326676	R	NR0B1	1stExon	1.81058	0.0218238	0	1.78663	0.0222808	0
cg00046099	X	54556443	R	GNL3L	TSS200	2.12638	0.0110513	0	2.10778	0.0111475	0
cg00072288	X	153200492	R	NAA10	TSS200	2.0787	0.0131024	0	2.04856	0.0136218	0
cg00072587	X	19531567	F	MAP3K15	Body	1.50067	0.0355052	0	1.46053	0.0368953	0
cg00078867	X	48542398	R	WAS	Body	2.13072	0.010739	0	2.10944	0.0111322	0
cg00098732	X	132096915	R	HS6ST2	TSS1500	-1.57632	0.0225573	0	-1.4813	0.0236312	0
cg00108056	X	153627317	F	RPL10	Body	2.09722	0.0112987	0	2.07784	0.0110505	0
cg00111239	X	71238329	R	NHSL2	Body	2.08616	0.0145271	0	2.04723	0.0149328	0
cg00112256	X	117629928	F	DOCK11	5'UTR	2.10512	0.0111378	0	2.06434	0.0112363	0
cg00113623	X	153640221	F	TAZ	1stExon	2.09558	0.0110408	0	2.06539	0.0111654	0
cg00114625	X	24483478	F	PDK3	5'UTR	2.07832	0.0125938	0	2.05594	0.012599	0
cg00114913	X	118107540	F	LONRF3	TSS1500	2.05217	0.0147908	0	2.01385	0.0156665	0
cg00115511	X	46404799	F	LOC401588	TSS200	2.09598	0.014725	0	2.08097	0.0151248	0
cg00116265	X	46306111	F	ZNF673	TSS1500	1.84542	0.0226295	0	1.7817	0.0229325	0
cg00116709	X	49020091	R	MAGIX	Body	2.07512	0.0126818	0	2.06553	0.0121362	0
cg00117066	X	16140434	F	GRPR	TSS1500	-1.50029	0.0318843	0	-1.51459	0.0327769	0
cg00121904	X	43741826	F	MAOB	TSS200	1.97386	0.0213115	0	1.92433	0.0222232	0
cg00128197	X	53461455	F	HSD17B10	TSS200	2.05827	0.0154707	0	2.03593	0.0159776	0
cg00130498	X	129192712	F			-1.63012	0.0292811	0	-1.65041	0.0296528	0
cg00139317	X	24665544	R	PCYT1B	TSS200	2.11434	0.0124247	0	2.09563	0.0117484	0
cg00139547	X	119603329	R	LAMP2	TSS200	2.10752	0.0115617	0	2.10363	0.0114844	0
cg00140085	X	152954284	R	SLC6A8	1stExon	2.11642	0.0104293	0	2.08171	0.0108133	0
cg00140189	X	10128888	R	CLCN4	5'UTR	-1.86212	0.022232	0	-1.83039	0.0228349	0
cg00142683	X	118708623	F	UBE2A	5'UTR	2.05931	0.0144008	0	2.05745	0.0140685	0
cg00145348	X	55026862	R	APEX2	1stExon	2.06242	0.0154188	0	2.05308	0.0155033	0
cg00148031	X	25021725	R			1.51463	0.0312486	0	1.54922	0.0320345	0
cg00150363	X	107068750	R	MID2	TSS1500	1.88756	0.0227428	0	1.84564	0.0240619	0
cg00150874	X	40003284	R	BCOR	5'UTR	-2.02103	0.0183856	0	-1.97353	0.0191861	0
cg00151234	X	77359363	R	PGK1	TSS1500	2.0598	0.013901	0	2.05248	0.013535	0
cg00158454	X	136509526	F			1.93488	0.0188617	0	1.89316	0.0196406	0
cg00167275	10	88854588	R	FAM35A	TSS1500	1.75901	0.0249153	0	1.73284	0.0254775	0
cg00173270	X	106691272	R			-1.49347	0.0339586	0	-1.50446	0.0336317	0
cg00179446	X	118986947	F	UPF3B	1stExon	2.05483	0.0160929	0	2.03814	0.0165423	0
cg00179598	X	38078359	F	SRPX	Body	-1.7583	0.0268618	0	-1.71622	0.0281882	0
cg00188257	X	34677877	F			-1.53689	0.0291626	0	-1.58449	0.0280408	0
cg00188409	X	139592612	F			1.53291	0.0347127	0	1.47055	0.0359758	0
cg00191052	X	46432770	R	CHST7	TSS1500	2.05227	0.0150961	0	2.00858	0.0160346	0
cg00191758	X	55478814	R	MAGEH1	1stExon	2.13637	0.00939464	0	2.10005	0.00979185	0
cg00192980	X	77394971	F	TAF9B	Body	2.13257	0.0104079	0	2.11477	0.0101253	0
cg00194519	X	133679545	F	MGC16121	Body	-1.79086	0.0251702	0	-1.76352	0.0269246	0
cg00195237	X	68722118	R			-1.84477	0.0245232	0	-1.82216	0.0260443	0
cg00200463	X	67913573	F	STARD8	5'UTR	2.0109	0.015571	0	1.99885	0.0145851	0
cg00203568	X	135850876	R	ARHGEF6	Body	1.92218	0.0207985	0	1.88255	0.0219199	0
cg00213805	X	129300008	R	AIFM1	TSS1500	1.87206	0.0218971	0	1.8842	0.0223526	0
cg00213853	X	154034091	F	MPP1	TSS1500	2.08899	0.0128103	0	2.06095	0.0135652	0
cg00213957	X	69509697	F	PDZD11	5'UTR	2.11382	0.013243	0	2.08863	0.0133772	0
cg00216997	X	48980153	R	GPKOW	TSS200	2.11707	0.0111002	0	2.08532	0.0113639	0
cg00227584	X	53123426	R			2.08477	0.0119222	0	2.06189	0.0114312	0
cg00230685	X	17755839	R	SCML1	5'UTR	2.06404	0.0142192	0	2.03477	0.0143472	0
cg00231549	X	33744176	R			1.80093	0.0270632	0	1.78319	0.0278998	0
cg00238052	X	101380291	F	TCEAL2	TSS1500	1.89834	0.0234882	0	1.8899	0.0247785	0
cg00238131	X	71527298	F	CITED1	TSS1500	1.92896	0.019357	0	1.88092	0.020506	0
cg00240113	X	136648241	F	ZIC3	TSS200	1.87837	0.020383	0	1.81153	0.0213389	0
cg00241051	X	131262001	F	FRMD7	5'UTR	-1.50697	0.0337805	0	-1.45546	0.035635	0
cg00241296	X	103811315	R	IL1RAPL2	5'UTR	1.97424	0.0187864	0	1.94326	0.0194937	0
cg00241907	X	12993156	F	TMSB4X	TSS200	2.08721	0.0137182	0	2.05923	0.0145023	0
cg00243584	X	119022103	R			1.76013	0.0262027	0	1.71643	0.0287498	0
cg00245012	X	57148068	F	SPIN2B	TSS200	2.04329	0.018844	0	2.01667	0.0192205	0
cg00250879	X	135847852	F	ARHGEF6	Body	1.56378	0.0284484	0	1.49831	0.0321244	0
cg00253811	X	15353923	F	PIGA	TSS1500	2.12125	0.011376	0	2.09482	0.0117082	0
cg00255219	X	135991858	R			2.0717	0.014049	0	2.0434	0.0135852	0
cg00258480	X	48776587	R	PIM2	TSS200	1.98537	0.0201121	0	1.97636	0.021064	0
cg00260448	X	30907780	R	MAP3K7IP3	TSS1500	2.02903	0.0166374	0	2.01597	0.0170853	0
cg00264378	X	49687306	R	CLCN5	1stExon	2.08734	0.0114461	0	2.06932	0.0113559	0
cg00265812	X	47518579	R	LOC100133957	Body	2.13219	0.0107065	0	2.11434	0.0109687	0
cg00266918	X	17755541	R	SCML1	TSS200	1.58855	0.0312574	0	1.58679	0.0332342	0
cg00267352	X	149613734	R	MAMLD1	5'UTR	-1.66259	0.0300263	0	-1.64996	0.0309464	0
cg00267883	X	129111502	R			-1.46844	0.0354313	0	-1.42253	0.0367536	0
cg00271516	X	48658022	R			-1.94413	0.019579	0	-1.9199	0.0205856	0
cg00276426	X	106243545	R	MORC4	TSS200	2.07689	0.0176191	0	2.04817	0.0176897	0
cg00279797	X	109561918	R	AMMECR1	5'UTR	1.91436	0.0219308	0	1.91107	0.022086	0
cg00291222	X	100910662	R	ARMCX2	3'UTR	1.85223	0.0215608	0	1.81205	0.0221488	0
cg00328965	X	129243062	F	ELF4	5'UTR	2.07554	0.0121919	0	2.06343	0.0127303	0
cg00337921	X	129091288	F			2.09988	0.0140324	0	2.06511	0.0149952	0
cg00347850	X	46696907	R	RP2	Body	2.07545	0.0130836	0	2.02756	0.0137769	0
cg00348113	X	70149293	R	SLC7A3	Body	-1.43412	0.0302628	0	-1.36747	0.0314354	0
cg00351283	1	89448431	R	RBMXL1	Body	-1.5436	0.0288005	0	-1.5183	0.0292729	0
cg00357087	X	119738550	F	MCTS1	TSS200	1.99699	0.0175184	0	1.97938	0.0178406	0
cg00359973	X	53449900	F	RIBC1	1stExon	1.52441	0.0323527	0	1.44814	0.0345799	0
cg00360365	X	54556536	R	GNL3L	TSS200	1.96078	0.0185311	0	1.94676	0.0193844	0
cg00363318	X	74743636	F	ZDHHC15	TSS1500	1.3988	0.0337053	0	1.29315	0.0343869	0
cg00368230	X	152865160	F	FAM58A	TSS1500	2.07654	0.012037	0	2.07391	0.0117623	0
cg00369058	X	62972602	R	ARHGEF9	Body	-1.73662	0.0179568	0	-1.72271	0.0186766	0
cg00369477	X	113818635	F	HTR2C	5'UTR	1.5623	0.0315043	0	1.51986	0.0329301	0
cg00373606	X	68048660	R	EFNB1	TSS200	2.07735	0.0120389	0	2.06107	0.0123768	0
cg00374088	X	68758562	R			1.87325	0.0209391	0	1.85399	0.021663	0
cg00374346	X	71349037	R	NHSL2	Body	-1.66426	0.029024	0	-1.59263	0.0318997	0
cg00375105	X	153625785	F	RPL10	TSS1500	1.98769	0.0179285	0	1.99039	0.0180417	0
cg00378473	X	23764087	R			1.97586	0.0184582	0	1.95997	0.0182516	0
cg00379371	X	48774742	F	PIM2	Body	1.9476	0.022846	0	1.91514	0.0232364	0
cg00380985	X	101397146	R	TCEAL6	5'UTR	2.05696	0.0149391	0	1.99568	0.0149732	0
cg00382651	X	102941915	F	MORF4L2	TSS200	1.99629	0.0195288	0	1.96946	0.0197317	0
cg00389276	X	13062862	F	FAM9C	TSS200	-1.90965	0.0205898	0	-1.89412	0.0211899	0
cg00389552	X	40028487	R	BCOR	5'UTR	-1.68356	0.0290916	0	-1.69762	0.0280224	0
cg00390049	X	153082274	R	PDZD4	Body	2.03882	0.0149253	0	2.01699	0.0153846	0
cg00391044	X	136510091	F			2.06169	0.0154918	0	2.02632	0.0156718	0
cg00399450	X	73834086	R	RLIM	5'UTR	2.10411	0.0113808	0	2.08696	0.0112203	0
cg00399683	7	153109375	R			2.03415	0.0151472	0	2.00537	0.0161169	0
cg00400999	X	101410998	F	BEX5	TSS200	1.93913	0.0231125	0	1.9223	0.0235698	0
cg00402910	X	109561221	F	AMMECR1	5'UTR	1.9496	0.0220146	0	1.92551	0.0227109	0
cg00403724	X	99839289	F	TNMD	TSS1500	-1.4039	0.0311211	0	-1.33662	0.0316154	0
cg00408231	X	100807848	F	ARMCX1	5'UTR	-1.99201	0.0162886	0	-1.94871	0.0178796	0
cg00409000	X	17395816	F	NHS	Body	2.04689	0.0172198	0	2.00064	0.0175589	0
cg00409480	X	38115655	R			-1.92342	0.0184714	0	-1.93213	0.018668	0
cg00411843	X	139584448	F			1.8643	0.0252603	0	1.85314	0.0263839	0
cg00412010	X	110339837	R	PAK3	5'UTR	1.89255	0.0198279	0	1.85916	0.021492	0
cg00412368	X	138285393	R	FGF13	5'UTR	1.99349	0.0163683	0	1.94761	0.0171665	0
cg00412554	X	117107719	R	KLHL13	5'UTR	-1.97604	0.0174465	0	-1.95963	0.0191781	0
cg00416689	X	102631887	F	NGFRAP1	TSS1500	2.01693	0.0155292	0	2.03086	0.015557	0
cg00419509	X	142804014	F	SPANXN2	1stExon	-1.40011	0.0313231	0	-1.3298	0.0310058	0
cg00426668	X	110514231	F	CAPN6	TSS1500	-1.69406	0.0204248	0	-1.64378	0.020953	0
cg00427681	X	68441389	R			1.70726	0.027239	0	1.66841	0.0279919	0
cg00428012	X	77166217	F	ATP7A	1stExon	2.0728	0.0132842	0	2.04083	0.014749	0
cg00428314	X	118708830	F	UBE2A	Body	2.09869	0.0107257	0	2.08889	0.0106539	0
cg00431602	X	23799775	F	SAT1	TSS1500	1.97503	0.0196805	0	1.95421	0.0212604	0
cg00433220	X	46697120	R	RP2	Body	2.02546	0.0164879	0	2.01074	0.0167492	0
cg00433890	X	20280171	R	RPS6KA3	Body	-1.37533	0.0340004	0	-1.39237	0.034124	0
cg00451631	X	25021643	F			1.83935	0.0265588	0	1.80052	0.0281146	0
cg00455738	X	103498075	R	ESX1	Body	1.7392	0.0304892	0	1.69303	0.0314316	0
cg00457389	X	18372736	F	SCML2	5'UTR	1.88376	0.0234296	0	1.8602	0.0239791	0
cg00458505	X	17393449	R	NHS	TSS200	1.87883	0.0210767	0	1.86889	0.0207137	0
cg00466309	X	148622572	F	LOC100131434	TSS1500	2.10101	0.0117341	0	2.07409	0.0117922	0
cg00466819	X	20009661	R			1.61814	0.0296768	0	1.66902	0.0273038	0
cg00467854	X	25040358	F			1.63832	0.0319202	0	1.59656	0.0332939	0
cg00473354	X	48334413	F	FTSJ1	TSS200	2.13404	0.0104404	0	2.10069	0.0110424	0
cg00478198	X	49644500	F	LOC158572	TSS1500	2.12993	0.0116027	0	2.08946	0.0117305	0
cg00481999	X	47696603	F	ZNF81	5'UTR	2.05531	0.0153132	0	2.02102	0.0154586	0
cg00484111	X	41112620	F			1.68461	0.0289758	0	1.64692	0.0311845	0
cg00484940	X	85403143	F	DACH2	TSS1500	1.84821	0.0206149	0	1.80762	0.0210016	0
cg00488364	X	114253315	R	IL13RA2	TSS1500	-1.68089	0.0264389	0	-1.63166	0.0276891	0
cg00500229	1	243054071	F			-1.8361	0.0214152	0	-1.79881	0.0226861	0
cg00510327	X	73835412	F	RLIM	TSS1500	-1.50154	0.0345244	0	-1.45804	0.0339946	0
cg00514746	X	37350627	R			-1.42412	0.0302319	0	-1.39284	0.0311513	0
cg00517765	X	18707777	F	PPEF1	TSS1500	-1.49486	0.0293682	0	-1.40445	0.0309753	0
cg00523465	X	134156667	R	FAM127C	TSS200	1.75206	0.027154	0	1.66952	0.0296836	0
cg00525383	X	136647793	F	ZIC3	TSS1500	1.78674	0.0226595	0	1.7259	0.0228997	0
cg00529027	X	151806225	R	GABRQ	TSS1500	2.04591	0.0134231	0	2.01669	0.0144882	0
cg00538420	X	107979988	R	IRS4	TSS1500	1.88799	0.0235499	0	1.83431	0.0243306	0
cg00547789	X	154493750	F	RAB39B	5'UTR	2.08106	0.0137889	0	2.06462	0.0142327	0
cg00553200	X	153210234	F	RENBP	TSS200	2.01509	0.017862	0	1.98263	0.0204284	0
cg00554969	X	79278012	F	TBX22	Body	1.82747	0.0215651	0	1.78053	0.0225172	0
cg00575851	X	134232238	R	NCRNA00087	Body	2.0253	0.0146497	0	2.00225	0.0147758	0
cg00577623	X	57934090	R	ZXDA	3'UTR	-1.80456	0.0255697	0	-1.70708	0.0268958	0
cg00578645	X	139012736	R			-1.36367	0.0267574	0	-1.31979	0.0279808	0
cg00581583	X	49047791	R	SYP	3'UTR	2.11001	0.0119176	0	2.074	0.011447	0
cg00582864	X	49779175	R	MIR502	TSS200	-1.60966	0.0301892	0	-1.61414	0.0314888	0
cg00583618	X	49020114	R	MAGIX	Body	2.07982	0.011302	0	2.07202	0.0112482	0
cg00583858	X	135632947	F	VGLL1	Body	-1.71121	0.0216392	0	-1.66196	0.0226859	0
cg00584971	X	99665588	F	PCDH19	TSS1500	1.76329	0.0264561	0	1.70113	0.0276113	0
cg00597858	X	51636568	F	MAGED1	5'UTR	2.0977	0.0116344	0	2.07007	0.0122418	0
cg00598664	X	152938750	F	PNCK	Body	1.79169	0.0262128	0	1.74266	0.02655	0
cg00603890	X	118699184	F	CXorf56	Body	2.00568	0.0176512	0	2.00652	0.0174116	0
cg00604086	X	67718648	F	YIPF6	TSS1500	2.11519	0.00983938	0	2.08639	0.0095407	0
cg00607036	X	119005506	F	NDUFA1	TSS1500	2.07709	0.0163891	0	2.06366	0.0168591	0
cg00609239	X	101853885	R	ARMCX5	TSS1500	1.85514	0.0226767	0	1.83216	0.0235583	0
cg00611101	X	101380608	R	TCEAL2	TSS200	2.06819	0.014608	0	2.05446	0.0149733	0
cg00614938	X	108717536	F	GUCY2F	Body	-1.51321	0.0340966	0	-1.4313	0.0346133	0
cg00618396	X	154444551	F	VBP1	TSS200	2.09612	0.0117037	0	2.05464	0.0124538	0
cg00619443	X	110039536	F	CHRDL1	TSS1500	1.59501	0.0306995	0	1.57038	0.0321495	0
cg00621925	X	152989492	R	BCAP31	Body	2.01767	0.0178598	0	2.0061	0.0181139	0
cg00622384	X	118925635	F	RPL39	TSS200	2.1093	0.0109592	0	2.10688	0.0105093	0
cg00622389	X	100914950	R	ARMCX2	TSS200	1.839	0.0197045	0	1.86391	0.02026	0
cg00623388	X	129116224	F	BCORL1	TSS1500	2.0874	0.0117017	0	2.06693	0.0119057	0
cg00625743	X	132353139	R	TFDP3	TSS1500	-1.3679	0.0310179	0	-1.28669	0.0332629	0
cg00625841	X	134156624	F	FAM127C	TSS200	1.86692	0.0199997	0	1.84432	0.0208735	0
cg00627024	X	23925866	F	CXorf58	TSS1500	2.08693	0.0133809	0	2.06139	0.0136978	0
cg00632374	X	46432929	F	CHST7	TSS1500	2.11688	0.0112181	0	2.0991	0.0108632	0
cg00634642	X	129040194	R	UTP14A	1stExon	2.07572	0.0153319	0	2.02609	0.0162522	0
cg00636562	X	47518136	F	UXT	Body	1.95059	0.0187933	0	1.92087	0.0192598	0
cg00641092	X	153151929	R			1.80543	0.0244227	0	1.82342	0.0247227	0
cg00645049	X	153656930	R	ATP6AP1	TSS200	2.10646	0.0102129	0	2.07803	0.00980091	0
cg00646659	X	48776613	F	PIM2	TSS1500	2.02779	0.016354	0	2.01621	0.0167611	0
cg00648125	X	51075046	R	NUDT10	TSS200	1.97792	0.0178174	0	1.95168	0.0176826	0
cg00651446	X	101380386	R	TCEAL2	TSS1500	1.99668	0.019758	0	1.97135	0.0202757	0
cg00658396	X	3630619	F	PRKX	Body	1.83831	0.0258471	0	1.78996	0.0264705	0
cg00661180	X	31285029	R	DMD	Body	1.98907	0.0188465	0	1.95159	0.0202515	0
cg00666173	X	46433828	F	CHST7	1stExon	2.0966	0.0123887	0	2.06969	0.0122923	0
cg00667781	X	53713885	F	HUWE1	TSS1500	2.09615	0.0117513	0	2.07274	0.0119275	0
cg00668426	X	102319340	F	BEX1	TSS200	2.01434	0.0168879	0	1.98134	0.016846	0
cg00673685	X	111699191	R	ZCCHC16	3'UTR	-1.45579	0.0263081	0	-1.39919	0.0258249	0
cg00680673	X	48815747	R	OTUD5	TSS1500	2.10623	0.0126701	0	2.09464	0.012364	0
cg00685925	X	48398048	R	TBC1D25	TSS200	2.09785	0.0109195	0	2.06559	0.0114637	0
cg00688681	X	53030043	R			1.40521	0.030781	0	1.3783	0.031585	0
cg00690049	X	54834244	F	MAGED2	TSS1500	2.11389	0.01124	0	2.09041	0.0108632	0
cg00694968	X	113997817	F	HTR2C	Body	-1.45812	0.0328527	0	-1.45975	0.0351403	0
cg00695324	X	107226116	F	TEX13B	TSS1500	-1.37041	0.0317805	0	-1.31032	0.0324885	0
cg00698744	X	53122826	R			1.94706	0.0218782	0	1.91287	0.0225737	0
cg00715011	X	80457681	F	HMGN5	TSS1500	2.02097	0.0172225	0	1.99197	0.0185907	0
cg00718858	X	50024233	F			-1.60385	0.0302247	0	-1.58826	0.0313104	0
cg00723034	X	75393425	R	CXorf26	Body	2.12537	0.00993771	0	2.10982	0.0100271	0
cg00723973	X	46696265	R	RP2	TSS200	2.08297	0.015926	0	2.06587	0.0155625	0
cg00723997	X	48690473	R	PCSK1N	Body	1.87065	0.0223381	0	1.85277	0.0234598	0
cg00724728	X	67867238	R	STARD8	TSS1500	-1.45762	0.0345987	0	-1.52619	0.0349436	0
cg00725777	X	102630411	F	NGFRAP1	TSS1500	-1.6204	0.0288538	0	-1.594	0.0290262	0
cg00725912	X	12810331	F	PRPS2	Body	2.0167	0.0176591	0	1.98525	0.0188045	0
cg00727483	X	62975065	F	ARHGEF9	TSS200	2.09324	0.0136402	0	2.06317	0.0137317	0
cg00729461	X	133371084	F	CCDC160	5'UTR	2.04156	0.0153372	0	2.0003	0.0161557	0
cg00730224	X	140982540	F	MAGEC3	Body	-1.48643	0.0327994	0	-1.49928	0.0335092	0
cg00735876	X	135334923	F	MAP7D3	TSS1500	-1.75978	0.0279358	0	-1.74194	0.028042	0
cg00735883	X	106567457	F			1.63944	0.030785	0	1.66528	0.0315818	0
cg00735885	X	111874418	F	LHFPL1	3'UTR	-1.85605	0.0211532	0	-1.78611	0.0229265	0
cg00738702	X	48684296	F			-1.3883	0.0358527	0	-1.40369	0.036209	0
cg00739467	X	152875780	R			2.11451	0.0104632	0	2.10018	0.0102085	0
cg00739787	X	131157326	F	MST4	5'UTR	2.07765	0.017363	0	2.051	0.017627	0
cg00742240	X	153287830	R	MECP2	3'UTR	-1.84234	0.0240989	0	-1.8372	0.024648	0
cg00743068	X	77041832	R	ATRX	TSS200	2.0687	0.0144909	0	2.05561	0.0145053	0
cg00745293	X	102862621	R	TCEAL3	TSS1500	2.0444	0.0163877	0	2.03433	0.0171097	0
cg00752874	X	107977583	R	IRS4	1stExon	1.70318	0.0280972	0	1.65109	0.0293707	0
cg00757453	X	17986297	F			-1.55128	0.0325543	0	-1.50443	0.032953	0
cg00762681	X	133369578	R	CCDC160	TSS1500	-1.74078	0.0265903	0	-1.74604	0.0294572	0
cg00763315	X	73439472	R	NCRNA00182	Body	-1.94589	0.0200047	0	-1.91696	0.0212929	0
cg00763725	X	154842689	F	TMLHE	TSS200	2.08346	0.0163649	0	2.03887	0.0158159	0
cg00765885	X	101771142	F	TMSB15A	5'UTR	2.00585	0.0168633	0	1.96721	0.0170676	0
cg00767637	X	72223388	R	PABPC1L2B	1stExon	1.93793	0.0216308	0	1.89614	0.0211148	0
cg00769064	X	136650951	R	ZIC3	Body	1.59735	0.029631	0	1.62114	0.0307894	0
cg00769799	X	133594079	R	HPRT1	TSS200	2.11982	0.0116943	0	2.09832	0.0124832	0
cg00774458	6	30692051	F	TUBB	Body	1.82661	0.0227152	0	1.78878	0.0234121	0
cg00775115	X	47343198	F	ZNF41	TSS1500	1.9155	0.0172992	0	1.89534	0.0180596	0
cg00776430	X	53111427	R	TSPYL2	TSS200	1.98225	0.0201674	0	1.96232	0.0206656	0
cg00779763	X	47479114	R	SYN1	1stExon	2.06343	0.0146044	0	2.02663	0.0143406	0
cg00780578	X	68727150	R	FAM155B	Body	-1.59687	0.0306	0	-1.51647	0.0324174	0
cg00781978	X	40506067	R	CXorf38	Body	1.81915	0.0252455	0	1.74589	0.0277016	0
cg00783137	X	103498585	F	ESX1	Body	1.55237	0.0315931	0	1.50832	0.0331934	0
cg00787015	X	40506177	R	CXorf38	Body	1.9452	0.0208718	0	1.8812	0.0228647	0
cg00790086	X	46696474	F	RP2	1stExon	2.10185	0.0107166	0	2.08897	0.0100941	0
cg00799224	X	19002639	F	PHKA2	TSS200	2.05698	0.0129511	0	2.02826	0.013474	0
cg00800095	X	152224090	F	PNMA3	TSS1500	-1.63088	0.0310502	0	-1.59054	0.0329925	0
cg00804338	13	114239234	R	TFDP1	5'UTR	1.7948	0.0277199	0	1.78339	0.028281	0
cg00805116	X	46404864	R	LOC401588	TSS200	2.06387	0.0137229	0	2.05932	0.0125991	0
cg00805156	X	3264341	R	MXRA5	5'UTR	-1.95308	0.0166999	0	-1.94246	0.0175884	0
cg00809111	X	130192134	R	FLJ30058	TSS200	1.5467	0.0300242	0	1.51406	0.0318504	0
cg00810519	X	48769107	R	SLC35A2	5'UTR	2.10831	0.0109417	0	2.09045	0.0103171	0
cg00810883	X	82763328	R	POU3F4	5'UTR	1.86745	0.0225693	0	1.82729	0.0237889	0
cg00813142	X	23685984	F	PRDX4	Body	2.10435	0.0123925	0	2.07544	0.0129195	0
cg00813156	X	153775885	F	IKBKG	1stExon	2.10583	0.0100052	0	2.08708	0.00971419	0
cg00813999	X	77582839	R	CYSLTR1	5'UTR	1.2469	0.0295591	0	1.20375	0.0308334	0
cg00815013	X	107681737	R	COL4A5	TSS1500	1.71414	0.0294969	0	1.67875	0.0308649	0
cg00815770	X	23925454	F	CXorf58	TSS1500	1.81818	0.0255764	0	1.84785	0.0259653	0
cg00816548	X	77154821	R	COX7B	TSS200	1.95657	0.0215319	0	1.96733	0.0218673	0
cg00818649	X	41782297	R	CASK	TSS200	2.0414	0.0129506	0	2.01177	0.0136629	0
cg00822942	X	54521170	R	FGD1	Body	-1.80651	0.0279225	0	-1.76548	0.028603	0
cg00823357	X	68048563	R	EFNB1	TSS1500	2.07709	0.0168698	0	2.0615	0.0164244	0
cg00824714	X	49189225	F	GAGE2E	Body	-1.74779	0.0286457	0	-1.73963	0.0299587	0
cg00825441	X	128789389	F	APLN	TSS1500	1.73615	0.0272384	0	1.70839	0.0287673	0
cg00829575	X	38663062	F	MID1IP1	5'UTR	2.12227	0.0124407	0	2.10928	0.0123162	0
cg00832136	X	35937697	F	CXorf22	TSS200	1.82463	0.0249654	0	1.79828	0.0251731	0
cg00832270	X	77359535	F	PGK1	TSS200	2.06149	0.0124868	0	2.05006	0.0126692	0
cg00834229	X	55515653	R	USP51	TSS200	2.05998	0.0133917	0	2.03697	0.013715	0
cg00839869	X	51640699	R	MAGED1	Body	-1.45051	0.0357307	0	-1.44522	0.0353335	0
cg00845806	X	154445068	R	VBP1	Body	1.96751	0.0170106	0	1.91332	0.0185232	0
cg00849191	X	152939154	R	PNCK	Body	1.93162	0.0194042	0	1.92585	0.0185913	0
cg00850648	X	138285828	R	FGF13	5'UTR	1.93259	0.020137	0	1.88154	0.0211423	0
cg00862041	X	101967017	R	GPRASP2	TSS1500	1.87002	0.0205934	0	1.81757	0.0209967	0
cg00874863	X	111924370	R	LHFPL1	TSS1500	-1.53494	0.0318059	0	-1.47034	0.0326902	0
cg00877056	X	107070410	F	MID2	Body	1.54421	0.0336751	0	1.53755	0.0349588	0
cg00878023	X	21392544	R	CNKSR2	1stExon	2.0778	0.0131361	0	2.05506	0.0127932	0
cg00881557	X	70401955	R			2.08781	0.014067	0	2.057	0.0148882	0
cg00883449	X	47930854	F	ZNF630	TSS1500	2.06496	0.0137417	0	2.05412	0.0147321	0
cg00895705	X	54384537	F	WNK3	TSS200	2.07825	0.0135222	0	2.01377	0.0143663	0
cg00901211	X	118602569	F	LOC100303728	Body	2.06346	0.012257	0	2.04575	0.012876	0
cg00901393	X	49776519	R	CLCN5	Body	-1.44177	0.0360949	0	-1.44924	0.0370744	0
cg00902308	X	40439693	F	ATP6AP2	TSS1500	1.79592	0.0285338	0	1.7436	0.030354	0
cg00904184	X	63425896	R	FAM123B	TSS1500	2.10696	0.0103407	0	2.07631	0.0102982	0
cg00909388	X	10085400	F	WWC3	Body	-1.56378	0.0324283	0	-1.54648	0.0331054	0
cg00910720	X	108780265	R	NXT2	Body	2.1033	0.0115435	0	2.08784	0.0114954	0
cg00913945	X	149014061	R	MAGEA8	3'UTR	-1.48338	0.0336099	0	-1.45604	0.0347354	0
cg00914218	X	69654348	F			2.12325	0.0119658	0	2.09402	0.0119395	0
cg00917018	X	140271549	R	LDOC1	TSS1500	1.98936	0.0190888	0	1.94119	0.0196279	0
cg00917362	X	154115825	R	F8A1	1stExon	1.69289	0.0243414	0	1.68301	0.0256047	0
cg00920537	X	133507230	R	PHF6	TSS200	2.07302	0.0127072	0	2.05918	0.0133538	0
cg00920960	X	122993419	R	XIAP	TSS1500	2.06883	0.0150162	0	2.02741	0.0152616	0
cg00928753	X	36976515	F			1.56933	0.0336777	0	1.51788	0.0361207	0
cg00929476	X	136645736	R			1.79594	0.024521	0	1.76538	0.0262139	0
cg00932276	X	13587976	F	EGFL6	5'UTR	1.93161	0.0193576	0	1.92204	0.0201928	0
cg00933162	X	55024263	R			-1.48402	0.0350154	0	-1.50181	0.0341412	0
cg00935394	X	11129115	R	HCCS	TSS1500	2.09626	0.014076	0	2.06358	0.0147627	0
cg00935924	X	118708353	F	UBE2A	TSS200	1.96159	0.0204902	0	1.90559	0.0220232	0
cg00936342	X	100306566	R	TRMT2B	5'UTR	2.1122	0.0113588	0	2.07625	0.0116565	0
cg00936349	X	106690556	R			-1.68063	0.029826	0	-1.61106	0.0317776	0
cg00936435	X	55187903	F	FAM104B	TSS1500	2.00161	0.0185175	0	1.97819	0.0185524	0
cg00937263	X	74145012	R	KIAA2022	5'UTR	2.07557	0.0123396	0	2.04888	0.0119308	0
cg00940232	X	135962391	R	RBMX	Body	2.10215	0.00981938	0	2.07887	0.0095704	0
cg00947275	X	64754953	F	LAS1L	TSS1500	1.95753	0.0214505	0	1.9199	0.022656	0
cg00953793	X	20283580	F	RPS6KA3	Body	1.90908	0.0228292	0	1.87542	0.0244161	0
cg00958651	X	147581562	R	AFF2	TSS1500	-1.94442	0.0201597	0	-1.93407	0.0192604	0
cg00960300	X	70886827	F	BCYRN1	Body	-1.7492	0.0244593	0	-1.69439	0.0259092	0
cg00960898	X	136113605	R	GPR101	1stExon	1.94833	0.0203191	0	1.90869	0.0213484	0
cg00962635	X	99986352	F	SYTL4	5'UTR	1.54588	0.0316486	0	1.52694	0.0327678	0
cg00963467	X	150151737	R	HMGB3	TSS200	2.10832	0.0101017	0	2.08938	0.00990395	0
cg00966524	X	135631856	R	VGLL1	Body	-1.91448	0.0229616	0	-1.87828	0.023841	0
cg00968475	X	101975738	F	BHLHB9	5'UTR	1.93979	0.0215296	0	1.93993	0.0215847	0
cg00968771	X	101854294	F	ARMCX5	5'UTR	1.89828	0.0173214	0	1.8747	0.0174238	0
cg00969573	X	84259298	F	APOOL	Body	2.03303	0.0166151	0	1.98026	0.0173579	0
cg00981643	X	153363708	F	MECP2	TSS1500	1.63364	0.0301098	0	1.6463	0.0302933	0
cg00981879	X	39680221	F			1.9032	0.0202919	0	1.88049	0.0206199	0
cg00988678	X	119005603	F	RNF113A	5'UTR	2.10523	0.00950907	0	2.08076	0.0098057	0
cg00993140	X	85403122	R	DACH2	TSS1500	2.06527	0.0136853	0	2.02826	0.0141087	0
cg00994038	X	128978322	R	ZDHHC9	TSS1500	2.00949	0.0176251	0	2.00348	0.0180008	0
cg00996177	X	38186710	F	RPGR	5'UTR	2.08537	0.0117751	0	2.06221	0.0117511	0
cg01000789	X	69509790	R	PDZD11	1stExon	2.09163	0.0110124	0	2.08396	0.0109295	0
cg01001959	X	55935071	R			2.08144	0.0140475	0	2.05052	0.0148431	0
cg01003197	X	67653925	F	OPHN1	TSS1500	2.01192	0.0188914	0	1.96492	0.0188137	0
cg01004805	X	71458680	F	ERCC6L	Body	2.07554	0.0167537	0	2.00823	0.0187801	0
cg01009686	X	77166354	R	ATP7A	5'UTR	1.71892	0.0287879	0	1.71694	0.0288829	0
cg01010618	X	130423130	F	IGSF1	5'UTR	2.06463	0.016375	0	2.00855	0.0177778	0
cg01019600	X	119125040	F			2.09436	0.012392	0	2.05519	0.0126744	0
cg01037726	X	152937549	F	PNCK	Body	-1.47865	0.0249403	0	-1.37576	0.0272302	0
cg01039990	X	136510831	R			2.02877	0.0147709	0	1.9876	0.0145655	0
cg01043588	X	69653552	R			1.91844	0.0216626	0	1.90428	0.0221501	0
cg01044189	X	51137589	F			-1.46693	0.0357385	0	-1.51423	0.036456	0
cg01046746	X	150863961	R			1.84428	0.0217439	0	1.84071	0.0222935	0
cg01052065	X	110339654	R	PAK3	5'UTR	1.87422	0.023624	0	1.85139	0.0237307	0
cg01056373	X	151999547	R	NSDHL	5'UTR	2.1078	0.00991485	0	2.08216	0.00983178	0
cg01057599	X	74493807	R	UPRT	TSS200	2.04871	0.0149139	0	2.01957	0.0159397	0
cg01058588	X	153775683	R	IKBKG	1stExon	2.09291	0.0119411	0	2.06461	0.0118215	0
cg01058932	X	55021626	R	PFKFB1	TSS1500	-1.56817	0.0269477	0	-1.5281	0.027654	0
cg01062269	X	100603843	F	TIMM8A	TSS200	2.08517	0.0114425	0	2.06269	0.0121538	0
cg01069311	X	47373245	R			1.57705	0.0243361	0	1.57943	0.0255782	0
cg01076406	X	73439721	F	NCRNA00182	Body	-1.74341	0.0283762	0	-1.74687	0.0291756	0
cg01078565	X	30233575	R	MAGEB2	TSS200	-1.65048	0.0309323	0	-1.58827	0.0325276	0
cg01078706	X	102024320	R			1.93162	0.021637	0	1.90408	0.0218998	0
cg01079126	X	149861641	F	MTMR1	TSS1500	2.12003	0.0105028	0	2.09241	0.0104432	0
cg01080552	X	2986093	F	ARSF	5'UTR	-1.38516	0.0327471	0	-1.3932	0.0333994	0
cg01080862	X	117861389	R	IL13RA1	TSS200	2.11558	0.0118339	0	2.07575	0.0124065	0
cg01081720	X	68047734	F	EFNB1	TSS1500	1.99771	0.017812	0	1.96065	0.0177999	0
cg01083397	X	153362990	F	MECP2	Body	1.99457	0.0144802	0	1.96752	0.0153469	0
cg01084827	X	55515720	F	USP51	TSS200	1.90474	0.0229665	0	1.86239	0.0237197	0
cg01086868	X	66764531	F	AR	1stExon	2.05605	0.0138205	0	2.03002	0.0141892	0
cg01087287	X	134136248	R			-1.84482	0.0239992	0	-1.82094	0.0248075	0
cg01087775	X	77042040	R	ATRX	TSS1500	1.8699	0.0226406	0	1.84295	0.0237097	0
cg01098518	X	102024175	R			1.5132	0.0334966	0	1.51433	0.0343807	0
cg01098871	X	48958509	R	WDR45	TSS1500	2.09216	0.0132489	0	2.09033	0.0132001	0
cg01099541	X	134166046	R	FAM127A	TSS1500	2.08155	0.0119977	0	2.07077	0.0123565	0
cg01108554	X	129473637	F	SLC25A14	TSS1500	2.06436	0.0154598	0	2.03966	0.0149584	0
cg01109660	X	19008190	F	GPR64	3'UTR	-1.8416	0.0164688	0	-1.79613	0.0170395	0
cg01112452	X	117958532	F	ZCCHC12	5'UTR	2.01915	0.0151944	0	2.0035	0.0154268	0
cg01114504	X	55115413	R	PAGE2	TSS200	-1.77495	0.0259366	0	-1.77324	0.028228	0
cg01119520	X	69670818	R	DLG3	TSS1500	-1.60283	0.0332218	0	-1.50446	0.0352055	0
cg01119763	X	37209004	R	PRRG1	5'UTR	1.57234	0.0332097	0	1.53656	0.0348593	0
cg01120006	X	48768342	R	SLC35A2	Body	2.0995	0.0120946	0	2.06132	0.0126968	0
cg01120894	X	129305726	R	RAB33A	TSS200	2.11318	0.0113404	0	2.08716	0.0115211	0
cg01121830	X	38186700	R	RPGR	5'UTR	2.07211	0.0125648	0	2.05969	0.0128525	0
cg01123965	X	39866890	F			-1.60614	0.0308948	0	-1.57225	0.0321232	0
cg01125381	X	49644706	F	LOC158572	TSS1500	2.04048	0.0162503	0	2.00552	0.0167717	0
cg01127291	X	63424405	R	FAM123B	5'UTR	-1.81663	0.0239349	0	-1.79361	0.0248086	0
cg01127586	X	62780937	F	LOC92249	TSS200	1.88809	0.0238615	0	1.82454	0.0251746	0
cg01131699	X	135863051	F	ARHGEF6	5'UTR	2.04538	0.0152391	0	2.02149	0.0154671	0
cg01134144	X	135863582	F	ARHGEF6	TSS200	1.67093	0.0280339	0	1.67132	0.0285636	0
cg01134497	X	27999627	F	DCAF8L1	TSS200	-1.73081	0.0273272	0	-1.69052	0.0283992	0
cg01138740	X	137946672	R	FGF13	5'UTR	-1.40033	0.033411	0	-1.37423	0.0336964	0
cg01140782	X	152864413	F	FAM58A	Body	2.03011	0.017222	0	2.00275	0.0172162	0
cg01142317	X	101186992	F	ZMAT1	TSS1500	2.05685	0.013956	0	2.02678	0.0144099	0
cg01143780	X	113813553	R			-1.46699	0.0352764	0	-1.50374	0.0363867	0
cg01145939	X	10098219	F	WWC3	Body	-1.55161	0.0329882	0	-1.50948	0.0338899	0
cg01150083	X	48980043	R	GPKOW	1stExon	2.07403	0.0149881	0	2.04476	0.0153156	0
cg01162900	X	149930532	F	MTMR1	Body	-1.54897	0.0344883	0	-1.48498	0.0367198	0
cg01166930	X	46404528	F	ZNF674	5'UTR	1.80199	0.0240711	0	1.7989	0.0239377	0
cg01169440	X	118603378	R	SLC25A5	Body	2.01673	0.0192972	0	2.02163	0.0182553	0
cg01172484	X	55478539	R	MAGEH1	1stExon	2.08936	0.0143895	0	2.05472	0.0146334	0
cg01173474	X	133370977	R	CCDC160	TSS200	1.99018	0.0159117	0	1.9573	0.0161601	0
cg01173508	X	110544388	R	DCX	3'UTR	-1.68594	0.0298426	0	-1.6254	0.0309823	0
cg01178063	X	69283055	F	OTUD6A	1stExon	-1.67961	0.0274494	0	-1.64701	0.0300119	0
cg01187510	X	103401766	F	MCART6	TSS200	1.9945	0.0175216	0	2.00935	0.0172511	0
cg01191578	X	55020455	R	PFKFB1	1stExon	-1.90131	0.0240127	0	-1.86633	0.0251821	0
cg01191832	X	57619327	F	ZXDB	1stExon	1.54827	0.0342905	0	1.51182	0.0348434	0
cg01191902	X	48931851	F	PRAF2	TSS200	2.11541	0.0107174	0	2.10021	0.0114448	0
cg01195014	X	51546668	F	MAGED1	5'UTR	2.07784	0.0163116	0	2.01736	0.0181988	0
cg01207755	X	49687058	R	CLCN5	TSS200	2.02714	0.0166538	0	2.02898	0.0165853	0
cg01210880	X	122319025	R	GRIA3	Body	2.01632	0.0155207	0	2.0069	0.0155133	0
cg01212429	X	150066099	R	CD99L2	Body	1.4045	0.034163	0	1.46562	0.0347454	0
cg01212677	X	24483290	R	PDK3	TSS200	2.10991	0.0110051	0	2.08478	0.0113831	0
cg01212903	X	139517847	F			-1.46162	0.0322678	0	-1.39895	0.034222	0
cg01215118	X	152066708	F			2.08724	0.0128664	0	2.04128	0.0133482	0
cg01215761	X	129254804	F			2.04988	0.014003	0	2.05473	0.0143491	0
cg01219451	X	64627700	F			1.80534	0.0231785	0	1.75202	0.0237742	0
cg01222180	X	150345616	R	GPR50	Body	1.79955	0.0247112	0	1.74699	0.0255353	0
cg01225095	12	32909323	F	YARS2	TSS1500	1.14639	0.0281819	0	1.12621	0.0280726	0
cg01225298	X	132091287	F	HS6ST2	Body	2.11061	0.0110851	0	2.07889	0.0114749	0
cg01228667	X	136114207	R	GPR101	TSS1500	2.07751	0.0133419	0	2.04979	0.0129545	0
cg01241836	X	48901346	R	TFE3	TSS1500	2.09388	0.0109726	0	2.08471	0.0107234	0
cg01244877	X	153598902	F	FLNA	Body	2.08818	0.0112436	0	2.06666	0.0117373	0
cg01245531	X	138277067	F	FGF13	5'UTR	1.97055	0.0206175	0	1.89671	0.0214581	0
cg01257202	X	153991830	F	DKC1	Body	2.01687	0.0177398	0	1.97843	0.0189746	0
cg01283227	X	18446221	F	CDKL5	5'UTR	-1.11207	0.0223709	0	-1.06386	0.0243402	0
cg01286388	X	77151065	F	MAGT1	TSS200	2.08429	0.0134991	0	2.05584	0.014769	0
cg01288367	X	68384992	F	PJA1	5'UTR	2.10475	0.0102609	0	2.08836	0.0100811	0
cg01289637	X	114468879	F	LRCH2	TSS1500	1.83102	0.0218442	0	1.80834	0.0225431	0
cg01290688	X	49643501	R	USP27X	TSS1500	1.77602	0.0240385	0	1.77732	0.0247681	0
cg01293271	X	139585768	F	SOX3	3'UTR	1.9754	0.0206652	0	1.91765	0.0220191	0
cg01293417	X	77394723	R	TAF9B	Body	2.00826	0.0187587	0	1.99715	0.0195663	0
cg01296971	X	37348138	R			-1.46335	0.0343824	0	-1.46259	0.0344247	0
cg01301326	X	40014433	F	BCOR	5'UTR	1.78632	0.025432	0	1.74069	0.026901	0
cg01303569	X	48755020	R	TIMM17B	Body	2.1203	0.0105529	0	2.09029	0.0109414	0
cg01306265	X	100914469	F	ARMCX2	5'UTR	1.75122	0.0235786	0	1.70672	0.0234184	0
cg01308913	X	25040907	R			1.89394	0.0225652	0	1.88207	0.0233383	0
cg01309671	X	133941225	F	FAM122C	5'UTR	2.0645	0.014439	0	2.04628	0.0146952	0
cg01310267	X	13956720	R	GPM6B	1stExon	1.51218	0.0315645	0	1.47464	0.0331516	0
cg01314643	X	62570863	R	SPIN4	5'UTR	2.06179	0.0130578	0	2.05386	0.0131768	0
cg01316390	X	118205446	F			-1.59241	0.0221267	0	-1.53262	0.0223498	0
cg01318188	X	123094675	F	STAG2	1stExon	2.04419	0.014096	0	2.03492	0.0135307	0
cg01321220	X	78216969	R	P2RY10	Body	-1.61982	0.0318392	0	-1.54456	0.0326024	0
cg01331780	X	30265202	R	MAGEB1	TSS200	-1.74339	0.0282987	0	-1.72823	0.0290957	0
cg01333849	X	118370171	R	PGRMC1	TSS200	1.88755	0.0235694	0	1.88725	0.0244966	0
cg01337545	X	2847549	R	ARSD	TSS200	1.30269	0.0302025	0	1.28936	0.0329288	0
cg01337817	X	152912242	F	DUSP9	5'UTR	1.41173	0.0349767	0	1.44613	0.0356047	0
cg01342901	X	118892768	R	ANKRD58	1stExon	2.09586	0.0105026	0	2.08753	0.0101203	0
cg01343084	X	54521658	R	FGD1	1stExon	1.7606	0.025833	0	1.72461	0.0264211	0
cg01345087	X	47479175	R	SYN1	5'UTR	2.08851	0.0113112	0	2.06307	0.0111542	0
cg01348758	X	80457518	R	SH3BGRL	5'UTR	1.9043	0.0208109	0	1.86378	0.0217003	0
cg01353347	X	153285158	F	IRAK1	1stExon	2.07288	0.0132681	0	2.05309	0.013436	0
cg01353788	X	147582069	F	AFF2	TSS200	2.09809	0.0113071	0	2.08255	0.0101977	0
cg01353903	X	99662650	R	PCDH19	1stExon	1.41215	0.033582	0	1.37821	0.0348942	0
cg01354447	X	31089887	R	FTHL17	1stExon	-1.51637	0.0334659	0	-1.53198	0.0345447	0
cg01361446	X	70331315	R	IL2RG	1stExon	1.82051	0.0268582	0	1.81349	0.0273146	0
cg01364818	X	129402953	F	ZNF280C	TSS200	2.09744	0.011957	0	2.07226	0.0120406	0
cg01364907	X	24336335	F			-1.41746	0.0294515	0	-1.36232	0.0291677	0
cg01366378	X	100353183	R			2.11511	0.0120646	0	2.08429	0.0123151	0
cg01370077	X	150565243	F	VMA21	TSS1500	2.09375	0.0121504	0	2.07817	0.0119565	0
cg01370179	X	153218937	F	HCFC1	Body	1.59547	0.0320932	0	1.59023	0.0326063	0
cg01372992	X	130037175	F	ENOX2	5'UTR	2.06831	0.0147077	0	2.04382	0.0150291	0
cg01374431	X	102469950	R	BEX4	TSS200	2.0624	0.0124384	0	2.06544	0.0125718	0
cg01374885	X	146319567	R	MIR508	TSS1500	-1.71422	0.0227309	0	-1.65338	0.0231582	0
cg01379263	X	67867130	R	STARD8	TSS1500	-1.75139	0.0271067	0	-1.79259	0.027859	0
cg01381545	X	19140538	R	GPR64	5'UTR	1.95204	0.0199644	0	1.93026	0.0209247	0
cg01382771	X	102983822	F	GLRA4	TSS1500	-1.61811	0.0237134	0	-1.50555	0.0259685	0
cg01383228	X	124336658	R			1.56589	0.0330352	0	1.54744	0.0345665	0
cg01383599	X	25020151	F			-1.993	0.0182824	0	-1.9715	0.0187237	0
cg01384686	X	135579487	R	HTATSF1	TSS200	2.11432	0.0103318	0	2.0899	0.0102309	0
cg01386236	X	101410618	F	BEX5	5'UTR	2.04402	0.016228	0	2.01677	0.0168522	0
cg01396530	X	12974262	F			1.87878	0.0219539	0	1.848	0.0229614	0
cg01397290	X	37208295	R	PRRG1	TSS1500	1.85319	0.0193581	0	1.84824	0.0200622	0
cg01398148	X	37850291	F	CXorf27	1stExon	-1.46929	0.0348408	0	-1.39983	0.0363516	0
cg01398859	X	25040609	F			1.51912	0.0311655	0	1.54221	0.0338157	0
cg01398912	X	147583273	R	AFF2	Body	2.08792	0.0129849	0	2.05818	0.0120085	0
cg01405303	X	152066574	F			2.11274	0.0110977	0	2.08323	0.0115717	0
cg01408383	X	15353254	R	PIGA	5'UTR	2.07072	0.0132062	0	2.05154	0.0135773	0
cg01410230	X	100645860	R	RPL36A	TSS200	2.0989	0.0106932	0	2.07747	0.0105608	0
cg01413005	1	171561022	F	BAT2L2	3'UTR	-1.41972	0.0309928	0	-1.34337	0.032612	0
cg01415112	X	103411709	R	CXorf39	Body	2.0152	0.0147766	0	2.00162	0.0151288	0
cg01430241	X	153665714	F	GDI1	Body	2.11161	0.012975	0	2.06987	0.0133447	0
cg01434723	X	153715087	F	UBL4A	TSS200	2.07635	0.0154169	0	2.0559	0.0157964	0
cg01436914	X	57936269	R	ZXDA	1stExon	2.01614	0.0172587	0	2.02373	0.0172187	0
cg01445307	X	21959520	R	SMS	Body	2.06892	0.0147152	0	2.05441	0.0144312	0
cg01460974	X	62975657	R	ARHGEF9	TSS1500	1.63106	0.0290619	0	1.59911	0.0305056	0
cg01461762	X	100663470	F	GLA	TSS1500	2.12717	0.00890664	0	2.10168	0.00897828	0
cg01462040	X	147582071	F	AFF2	TSS200	2.10329	0.0109749	0	2.07612	0.010453	0
cg01463832	X	52964651	F			1.62818	0.0317185	0	1.61114	0.0330754	0
cg01466335	X	102866235	R			-1.74498	0.0292005	0	-1.71781	0.0301107	0
cg01466576	X	128787126	R	APLN	Body	-1.52135	0.0324608	0	-1.48097	0.0334919	0
cg01467086	X	152686726	F	ZFP92	Body	-1.46968	0.033774	0	-1.46566	0.0355243	0
cg01467249	X	135180523	R			-1.68494	0.0309304	0	-1.64459	0.032263	0
cg01472026	X	101187257	F	ZMAT1	TSS1500	2.05228	0.0149003	0	2.03166	0.0143867	0
cg01473187	X	99891162	R	TSPAN6	Body	-1.72649	0.0277792	0	-1.67721	0.0300307	0
cg01473525	X	103085819	F	RAB9B	5'UTR	-2.02828	0.0176256	0	-1.99274	0.0189904	0
cg01475387	X	37430689	F	LANCL3	TSS200	2.00635	0.0153131	0	1.97655	0.0166497	0
cg01477427	X	53461421	F	HSD17B10	TSS200	2.06347	0.0128176	0	2.03984	0.0133876	0
cg01479413	X	135849691	R	ARHGEF6	Body	2.08567	0.0154124	0	2.02308	0.0160073	0
cg01480550	X	151143526	R	GABRE	TSS1500	1.89122	0.0232355	0	1.84817	0.0240687	0
cg01483252	X	46433132	R	CHST7	TSS200	2.08631	0.0119091	0	2.05305	0.0131341	0
cg01486020	X	71131509	R	NHSL2	Body	2.00912	0.0161684	0	1.99794	0.0163061	0
cg01488378	X	48769307	F	SLC35A2	TSS200	2.02409	0.0192813	0	1.93805	0.0198475	0
cg01522249	X	39951640	F	BCOR	5'UTR	-1.38921	0.0291683	0	-1.42514	0.0302392	0
cg01522335	X	50647118	F	LOC347376	TSS1500	-1.75565	0.0242764	0	-1.70008	0.0249926	0
cg01523865	X	136651179	R	ZIC3	Body	1.75872	0.0255625	0	1.64804	0.0274084	0
cg01528616	X	48979067	R	GPKOW	Body	-1.43478	0.0347145	0	-1.51705	0.0354862	0
cg01528835	X	73438299	F	NCRNA00182	Body	-1.75333	0.028669	0	-1.74596	0.0299957	0
cg01530162	X	139589424	F			1.73533	0.0269624	0	1.71721	0.0278944	0
cg01530521	X	119378908	R	CXorf42	Body	2.12426	0.0111239	0	2.10051	0.0112144	0
cg01533115	X	48911192	R			2.09051	0.0135941	0	2.0628	0.0136508	0
cg01534758	X	37061627	R			-1.59243	0.033496	0	-1.60517	0.0341461	0
cg01537968	X	99987037	R	SYTL4	1stExon	2.06722	0.0139663	0	2.03006	0.0138824	0
cg01540386	X	39873535	R			1.82805	0.0263027	0	1.77216	0.0279497	0
cg01543116	X	100184268	R	XKRX	TSS1500	2.01717	0.0175108	0	1.98406	0.0185184	0
cg01555661	X	47004645	R	NDUFB11	TSS200	2.03742	0.0170894	0	1.99823	0.0176007	0
cg01556010	X	74493847	R	UPRT	TSS200	2.08761	0.0126692	0	2.05975	0.0129311	0
cg01558501	X	99667223	F			1.808	0.0238467	0	1.81196	0.0244494	0
cg01560464	X	142721195	F	SLITRK4	5'UTR	1.69797	0.025332	0	1.68699	0.0262053	0
cg01560885	X	63426841	F	FAM123B	TSS1500	-1.89452	0.0216389	0	-1.87672	0.0218962	0
cg01562833	X	133684080	F			2.08289	0.0122389	0	2.06207	0.0119181	0
cg01564693	X	68381877	R	PJA1	Body	-1.53142	0.0333334	0	-1.55175	0.0345101	0
cg01567000	X	135991334	F			2.12097	0.0118864	0	2.10935	0.0118282	0
cg01568488	X	37767516	R			-1.57132	0.029845	0	-1.55921	0.028687	0
cg01573782	X	38079899	F	SRPX	Body	2.10985	0.0118246	0	2.08692	0.011666	0
cg01575816	X	107683385	F	COL4A5	1stExon	2.05147	0.0158559	0	2.01734	0.0162816	0
cg01579322	X	54209148	F	FAM120C	1stExon	2.09516	0.010783	0	2.07794	0.010844	0
cg01581349	X	25019025	F			-1.51713	0.0327861	0	-1.5418	0.033347	0
cg01589255	X	73756723	R			1.98236	0.0186606	0	1.94116	0.0187953	0
cg01593269	X	152676703	R			2.00547	0.015224	0	2.01348	0.0149322	0
cg01596349	X	153627775	R	RPL10	Body	1.94887	0.0198245	0	1.94353	0.0197778	0
cg01600123	X	69672435	R	DLG3	5'UTR	2.03555	0.015368	0	2.01241	0.0151586	0
cg01600263	X	102840724	F	TCEAL4	5'UTR	1.98894	0.0176611	0	1.98783	0.0175998	0
cg01609611	X	136655880	R			1.67686	0.0311383	0	1.63579	0.0320852	0
cg01634761	X	68048386	R	EFNB1	TSS1500	2.07713	0.013137	0	2.07551	0.013805	0
cg01640808	X	21674815	R	KLHL34	1stExon	1.63457	0.031044	0	1.58278	0.0316378	0
cg01662650	X	21874323	F	YY2	TSS1500	-1.57369	0.0307216	0	-1.59908	0.030933	0
cg01668271	X	47696333	R	ZNF81	1stExon	2.08158	0.0134287	0	2.0663	0.0127313	0
cg01669374	X	12809328	F	PRPS2	TSS200	2.1072	0.0141783	0	2.0638	0.0150772	0
cg01671070	X	101410339	F	BEX5	5'UTR	2.05013	0.0167775	0	2.0125	0.0173368	0
cg01673753	X	39546488	F			-1.87944	0.0198666	0	-1.85716	0.021011	0
cg01674874	X	49017903	F	MAGIX	TSS1500	-1.87864	0.0228629	0	-1.82183	0.0235249	0
cg01683788	X	11777794	F	MSL3	5'UTR	2.09711	0.0122249	0	2.07338	0.0121529	0
cg01706033	X	102862807	R	TCEAL3	TSS200	1.87876	0.0221528	0	1.81486	0.0237761	0
cg01716666	X	119077648	F	NKAP	1stExon	2.11951	0.00938876	0	2.10131	0.0093828	0
cg01717812	X	74376285	R	ABCB7	TSS200	2.02631	0.0162299	0	2.00165	0.0164326	0
cg01718602	X	85403899	R	DACH2	1stExon	2.02451	0.0161598	0	1.99201	0.0163698	0
cg01730928	X	74143801	R	KIAA2022	5'UTR	1.62052	0.0329508	0	1.52348	0.0318913	0
cg01732428	X	16730881	R	CTPS2	TSS1500	1.78267	0.0251844	0	1.71211	0.0275241	0
cg01733439	X	49042949	R	PRICKLE3	TSS200	2.0633	0.0131828	0	2.06179	0.0127825	0
cg01737010	X	101772014	R	TMSB15A	TSS1500	1.82674	0.0240761	0	1.79662	0.0233656	0
cg01737421	X	48367069	R	PORCN	TSS1500	1.93446	0.0227746	0	1.88343	0.0236862	0
cg01742836	X	135229755	F	FHL1	1stExon	2.09247	0.011985	0	2.0826	0.0119576	0
cg01747155	X	154842516	R	TMLHE	5'UTR	2.11254	0.010538	0	2.10081	0.0106483	0
cg01752898	X	38186917	R	RPGR	TSS200	1.97916	0.0189341	0	2.00905	0.0194167	0
cg01755617	X	153626633	F	RPL10	Body	2.10885	0.0114317	0	2.11065	0.0113493	0
cg01756638	X	154444356	R	VBP1	TSS1500	2.11213	0.0123514	0	2.07697	0.0133141	0
cg01757402	X	103810984	F	IL1RAPL2	TSS200	1.85398	0.0222138	0	1.83624	0.0235159	0
cg01758418	X	70151160	R	SLC7A3	TSS1500	1.78565	0.0233816	0	1.73766	0.0247744	0
cg01758988	X	148621525	R	LOC100131434	TSS1500	2.08697	0.0109841	0	2.05645	0.0116833	0
cg01759889	X	68725086	F	FAM155B	1stExon	2.05344	0.0147681	0	2.02065	0.0141898	0
cg01760027	X	49832257	R	CLCN5	Body	-1.73526	0.0295372	0	-1.75608	0.0289479	0
cg01762011	X	139173393	F			2.01483	0.0147135	0	1.96562	0.0159905	0
cg01771673	X	106361539	F	RBM41	Body	2.1133	0.0115328	0	2.09887	0.011428	0
cg01773478	X	46434442	R	CHST7	1stExon	2.09251	0.011591	0	2.09181	0.011519	0
cg01776229	X	82764385	F	POU3F4	1stExon	1.735	0.0256357	0	1.6865	0.0271521	0
cg01777017	X	138287603	F	FGF13	TSS1500	2.03308	0.0175759	0	2.01788	0.0176881	0
cg01780361	X	56590386	F	UBQLN2	1stExon	2.08377	0.0149351	0	2.06669	0.0148269	0
cg01780412	X	37004521	R			2.06003	0.0133881	0	2.04143	0.0135807	0
cg01786460	X	106516773	R			-1.54178	0.0315455	0	-1.51422	0.0334323	0
cg01798375	X	47489719	R	CFP	TSS1500	1.90463	0.0213537	0	1.88965	0.0220464	0
cg01804836	X	102565738	F	BEX2	1stExon	2.07093	0.0137313	0	2.06817	0.0134723	0
cg01807688	X	133680740	R	MGC16121	TSS200	-1.69506	0.0285827	0	-1.68745	0.0292354	0
cg01807728	X	150151624	F	HMGB3	TSS200	2.09247	0.0118129	0	2.07096	0.0112677	0
cg01809408	X	53112501	R	TSPYL2	Body	2.06581	0.0144951	0	2.05078	0.0139724	0
cg01813294	X	17393426	F	NHS	TSS200	1.99163	0.0169718	0	1.98672	0.0168274	0
cg01816615	X	112066190	R	AMOT	5'UTR	-1.66455	0.0264644	0	-1.62069	0.0265321	0
cg01817069	X	129086975	R			2.12076	0.0112536	0	2.09616	0.0102178	0
cg01825872	X	67653324	F	OPHN1	TSS200	1.98628	0.0161969	0	1.94554	0.0166668	0
cg01826283	X	73512386	R	NCRNA00182	Body	2.04823	0.013618	0	2.0156	0.0137836	0
cg01828434	X	106960491	R	TSC22D3	TSS1500	2.06783	0.0151993	0	2.03938	0.0155463	0
cg01828474	X	21676593	R	KLHL34	TSS200	1.9098	0.0201581	0	1.85782	0.0206048	0
cg01831199	X	106362045	F	RBM41	5'UTR	1.66194	0.0287289	0	1.62343	0.0299842	0
cg01831944	X	95939323	F	DIAPH2	TSS1500	1.63933	0.0301156	0	1.60704	0.0296619	0
cg01832419	X	24043059	R	KLHL15	5'UTR	2.08326	0.010875	0	2.08114	0.0110234	0
cg01843978	X	49772184	F	CLCN5	Body	-1.62537	0.0309938	0	-1.57983	0.0322725	0
cg01847754	X	144909347	R	CXorf1	1stExon	-1.69242	0.0238341	0	-1.61649	0.0243235	0
cg01850541	X	67867448	R	STARD8	TSS200	1.65877	0.0294183	0	1.6488	0.030177	0
cg01852560	X	68348839	R			1.76401	0.0260066	0	1.74947	0.0272502	0
cg01855997	X	49643944	F	USP27X	TSS1500	2.10727	0.0109062	0	2.09158	0.0108307	0
cg01857253	X	139014460	F			2.04885	0.01378	0	2.04454	0.0133787	0
cg01857704	X	102965678	F	TMEM31	TSS200	-1.72208	0.0245945	0	-1.67851	0.0257764	0
cg01864032	X	69674332	F	DLG3	Body	1.98763	0.0194703	0	1.96658	0.0207224	0
cg01868753	X	106361886	F	RBM41	Body	1.87664	0.0243107	0	1.85787	0.0244609	0
cg01869765	X	47862977	R	ZNF182	5'UTR	2.12942	0.0112089	0	2.10203	0.0115645	0
cg01873087	X	48397836	F	TBC1D25	TSS1500	2.08936	0.0122583	0	2.07557	0.0124558	0
cg01878825	X	48052499	F	SSX5	Body	-1.4051	0.027383	0	-1.33539	0.0280324	0
cg01881753	X	152733671	F	HAUS7	Body	-1.49253	0.0322654	0	-1.52416	0.0333848	0
cg01884384	X	118108832	F	LONRF3	1stExon	2.04941	0.0159615	0	2.01517	0.0161947	0
cg01885202	X	18443457	R	CDKL5	TSS1500	2.0998	0.0124921	0	2.08422	0.0123975	0
cg01886630	X	16964556	R	REPS2	TSS1500	2.03598	0.0161152	0	2.03073	0.0164756	0
cg01887353	X	47342480	F	ZNF41	TSS200	2.10074	0.0115905	0	2.06823	0.0121603	0
cg01888389	X	44735560	F	KDM6A	Body	1.36005	0.0267204	0	1.32517	0.0279344	0
cg01891172	X	21676483	R	KLHL34	TSS200	1.90257	0.0207917	0	1.87513	0.0217303	0
cg01892695	X	99893802	R			-1.538	0.0319679	0	-1.48703	0.0333702	0
cg01895141	X	51360852	R			-1.67838	0.0282823	0	-1.72484	0.028596	0
cg01896298	X	69643036	F	GDPD2	1stExon	1.78883	0.0243673	0	1.78183	0.0253854	0
cg01905377	X	49122718	R	FOXP3	TSS1500	-1.98288	0.0179105	0	-1.92551	0.0197214	0
cg01906879	3	81811016	F	GBE1	TSS200	1.41863	0.0356636	0	1.45926	0.0355763	0
cg01906946	X	39951219	R	BCOR	5'UTR	-1.9876	0.0154489	0	-1.95989	0.0155985	0
cg01910452	X	152989424	F	BCAP31	Body	2.09635	0.0138785	0	2.07648	0.0136096	0
cg01911846	X	102510229	R	TCEAL8	TSS200	2.12837	0.010644	0	2.0885	0.0112628	0
cg01912769	X	152691117	F			-1.48196	0.0334519	0	-1.44944	0.0343239	0
cg01913024	X	129300230	R	AIFM1	TSS1500	2.04454	0.0140105	0	2.02159	0.0142472	0
cg01913196	X	125687041	R	DCAF12L1	TSS200	1.43537	0.031988	0	1.37209	0.0335082	0
cg01915804	X	77395258	R	TAF9B	TSS200	2.09564	0.0112523	0	2.0887	0.0116041	0
cg01918534	X	118828926	F			-1.70923	0.0287856	0	-1.74924	0.0290951	0
cg01924074	X	53711167	F	HUWE1	5'UTR	2.01309	0.012841	0	2.00376	0.0136382	0
cg01927625	X	69502017	F	RAB41	TSS200	-1.48865	0.0302116	0	-1.47868	0.0313244	0
cg01938887	X	135579106	F	HTATSF1	TSS1500	1.97402	0.0189289	0	1.96081	0.0195101	0
cg01947226	X	16889247	R	RBBP7	TSS1500	2.0219	0.0187191	0	1.97501	0.0200525	0
cg01948589	X	20285432	R	RPS6KA3	TSS1500	2.09843	0.0122043	0	2.07001	0.0130354	0
cg01951307	X	133940723	F	FAM122C	TSS1500	-1.66991	0.0259321	0	-1.63307	0.0268791	0
cg01962414	X	48689617	R	PCSK1N	3'UTR	-1.56847	0.0323469	0	-1.49875	0.0343943	0
cg01970554	X	50212323	F	DGKK	Body	1.77732	0.026049	0	1.77182	0.0271504	0
cg01984250	X	106364903	R			-1.56746	0.032937	0	-1.58507	0.03316	0
cg01991530	X	21857632	F	MBTPS2	TSS200	2.07604	0.0157949	0	2.03626	0.0161901	0
cg01992935	X	108868271	R	KCNE1L	1stExon	1.57215	0.0278285	0	1.59513	0.0279521	0
cg01994890	X	55024398	R			-1.70874	0.0265188	0	-1.72321	0.0290283	0
cg01996818	X	131157562	R	MST4	5'UTR	2.03128	0.0169742	0	2.0036	0.0177137	0
cg01997410	X	71351858	F	NHSL2	Body	1.98378	0.0187049	0	1.97307	0.0194414	0
cg01997953	X	30595690	F	CXorf21	5'UTR	2.03694	0.0172495	0	2.01887	0.0173872	0
cg01999076	X	46696420	R	RP2	1stExon	2.06857	0.0176541	0	2.06488	0.0178176	0
cg02004156	X	48900769	F	TFE3	1stExon	2.04653	0.0130411	0	2.02045	0.0131967	0
cg02010442	X	107335011	R	ATG4A	1stExon	2.09374	0.0139299	0	2.07306	0.0142066	0
cg02012821	X	95940519	R	DIAPH2	Body	2.05566	0.0161684	0	2.01211	0.0164588	0
cg02014085	X	54097113	R	FAM120C	3'UTR	-1.66564	0.0302116	0	-1.65589	0.0310598	0
cg02015053	15	44853982	F	EIF3J	3'UTR	-1.61674	0.0272103	0	-1.61321	0.0286118	0
cg02019068	X	48337472	F	FTSJ1	Body	-1.71262	0.0281193	0	-1.67435	0.0292306	0
cg02022247	X	25029872	R	ARX	Body	1.94903	0.0216771	0	1.90259	0.0231068	0
cg02025065	X	57148257	R	SPIN2B	TSS1500	2.11197	0.0104953	0	2.07852	0.0108669	0
cg02031392	X	24691135	R	PCYT1B	TSS200	-1.47709	0.0326141	0	-1.38259	0.0344641	0
cg02031980	X	71401203	F	PIN4	TSS1500	1.98065	0.0191037	0	1.95157	0.0198096	0
cg02032561	X	134478461	R	ZNF449	TSS1500	2.0767	0.0154694	0	2.06825	0.0156466	0
cg02035866	X	19002442	F	PHKA2	1stExon	2.11165	0.0136412	0	2.06302	0.0142953	0
cg02041067	X	153774721	R	IKBKG	TSS1500	1.7304	0.0250008	0	1.70901	0.0273741	0
cg02042142	X	17393160	R	NHS	TSS1500	2.03341	0.0143002	0	2.00155	0.0139705	0
cg02049865	X	117973548	R			2.11225	0.0101455	0	2.10166	0.00944514	0
cg02053896	X	70151117	R	SLC7A3	TSS200	1.69756	0.0252892	0	1.66073	0.0267667	0
cg02055404	X	82765593	R			1.73954	0.0263464	0	1.6435	0.0274328	0
cg02055547	X	144329242	F	SPANXN1	Body	-1.66566	0.0288576	0	-1.57763	0.0305642	0
cg02059755	X	65383371	F	HEPH	Body	-1.83401	0.0228735	0	-1.76414	0.0237944	0
cg02060618	X	50653733	F	BMP15	TSS200	-1.5271	0.0249799	0	-1.43775	0.0255214	0
cg02061213	X	107068771	R	MID2	TSS1500	1.97527	0.0184392	0	1.94601	0.0199204	0
cg02061906	X	34150514	F	FAM47A	TSS200	-1.78566	0.027263	0	-1.76354	0.0287642	0
cg02062238	X	38186830	R	RPGR	TSS200	2.05815	0.0159883	0	2.03331	0.0157734	0
cg02064569	X	103809580	R	IL1RAPL2	TSS1500	1.50647	0.0324187	0	1.49962	0.0331505	0
cg02077027	X	19817931	R	SH3KBP1	Body	1.97975	0.0202477	0	1.92726	0.0214329	0
cg02082650	X	25022003	R	ARX	3'UTR	1.68558	0.0273711	0	1.64133	0.0295345	0
cg02095003	X	152599890	R	ZNF275	5'UTR	2.00045	0.0199938	0	1.97617	0.0197319	0
cg02095995	X	138774239	R	MCF2	5'UTR	2.02358	0.0142293	0	2.01652	0.0149806	0
cg02112649	X	83442333	F	RPS6KA6	Body	1.93302	0.0219646	0	1.89245	0.0219124	0
cg02116333	X	53461433	F	HSD17B10	TSS200	2.10363	0.0107062	0	2.08651	0.010782	0
cg02117996	X	38660490	R	MID1IP1	TSS200	1.87391	0.0188818	0	1.85207	0.0195425	0
cg02120013	X	50214405	R	DGKK	TSS1500	1.99497	0.0202462	0	1.96315	0.0207195	0
cg02120046	X	132090860	F	HS6ST2	Body	1.92547	0.0206808	0	1.89986	0.0214119	0
cg02121672	X	24665932	R	PCYT1B	Body	1.47256	0.02877	0	1.44329	0.0291655	0
cg02124059	X	47341898	F	ZNF41	5'UTR	2.01065	0.0168051	0	1.97757	0.0176983	0
cg02124085	X	69641418	R	GDPD2	TSS1500	-1.87581	0.0215581	0	-1.88852	0.0201774	0
cg02127807	X	114468833	F	LRCH2	TSS200	1.99103	0.0174933	0	1.93994	0.0180784	0
cg02129889	X	118925789	R	RPL39	TSS200	2.0471	0.0162371	0	2.03033	0.016273	0
cg02132188	X	80377408	F	HMGN5	5'UTR	2.05375	0.0142346	0	2.00977	0.0154088	0
cg02148711	X	77041559	F	ATRX	1stExon	2.11583	0.0102007	0	2.08953	0.0101119	0
cg02150469	X	70327995	R	CXorf65	TSS1500	2.08548	0.0152934	0	2.06504	0.015595	0
cg02151779	X	48327875	R	SLC38A5	5'UTR	1.9215	0.0236268	0	1.87026	0.0247318	0
cg02154531	X	71237000	F	NHSL2	Body	-1.57811	0.0301472	0	-1.49189	0.0320671	0
cg02155675	X	48206388	F	SSX3	3'UTR	-1.66902	0.0249054	0	-1.63345	0.0262629	0
cg02155838	X	135067201	F	SLC9A6	TSS1500	1.95453	0.020935	0	1.96458	0.0212704	0
cg02156782	X	49126099	F	PPP1R3F	TSS1500	2.00966	0.0159463	0	1.98064	0.016157	0
cg02157475	X	72782852	R	LOC139201	Body	2.10949	0.00965464	0	2.07997	0.00992722	0
cg02161125	X	41782692	R	CASK	TSS1500	2.08553	0.0113043	0	2.06367	0.011496	0
cg02161824	X	134186388	R	FAM127B	TSS200	2.02908	0.0165485	0	2.00236	0.0164756	0
cg02161919	X	19002980	R	PHKA2	TSS1500	2.105	0.0144526	0	2.07261	0.0145394	0
cg02165720	X	47004051	F	NDUFB11	Body	2.10814	0.0110997	0	2.07889	0.0110703	0
cg02166322	X	37430711	R	LANCL3	TSS200	2.0503	0.0165649	0	2.04866	0.0169799	0
cg02166601	X	19140966	F	GPR64	TSS1500	1.62433	0.0308246	0	1.56167	0.0329738	0
cg02167358	X	15871902	F	AP1S2	5'UTR	-1.48379	0.032587	0	-1.44608	0.0316671	0
cg02169289	X	39967202	F	BCOR	5'UTR	-1.83607	0.0230227	0	-1.82421	0.0240189	0
cg02177607	X	128924261	R	SASH3	Body	1.44443	0.0287606	0	1.45619	0.0308589	0
cg02179438	X	49091760	R	CCDC22	TSS200	2.04371	0.01526	0	2.01912	0.0155996	0
cg02179880	X	48456308	R	WDR13	Body	1.97681	0.0148023	0	1.96112	0.0148472	0
cg02180505	X	30265129	F	MAGEB1	TSS200	-1.97361	0.0182989	0	-1.93719	0.019053	0
cg02185190	X	118534462	F	SLC25A43	Body	1.11317	0.0250158	0	1.12999	0.0268856	0
cg02187432	X	18371852	F	SCML2	5'UTR	1.84859	0.023007	0	1.8465	0.0233597	0
cg02193580	X	135251444	F	FHL1	TSS200	1.44771	0.0238712	0	1.42273	0.0241698	0
cg02195366	X	11776368	F	MSL3	5'UTR	2.10667	0.0117584	0	2.0808	0.0118502	0
cg02200373	X	128913578	F	SASH3	TSS1500	2.05829	0.0124217	0	2.05594	0.0121665	0
cg02201836	X	129039832	R	UTP14A	TSS1500	2.12913	0.011968	0	2.10783	0.0123906	0
cg02205962	X	152989807	F	BCAP31	Body	2.01051	0.0175583	0	1.98256	0.018547	0
cg02210067	X	11777709	R	MSL3	Body	1.95693	0.0212426	0	1.91545	0.0216618	0
cg02211869	X	134481233	F	ZNF449	Body	-1.51405	0.0345163	0	-1.52721	0.0355524	0
cg02213813	X	149534006	R			2.07342	0.0122491	0	2.05529	0.0119383	0
cg02214597	X	70474483	F	ZMYM3	5'UTR	1.98123	0.0178868	0	1.96587	0.0185712	0
cg02223323	X	20134399	R	MAP7D2	Body	1.80522	0.0239603	0	1.80537	0.0251475	0
cg02225164	X	153979588	F	GAB3	TSS1500	1.64085	0.0299969	0	1.67764	0.0311838	0
cg02229344	X	130216380	F	FLJ30058	Body	1.90644	0.0197043	0	1.86887	0.020333	0
cg02232536	X	153200899	R	RENBP	Body	2.08248	0.0119736	0	2.05103	0.0119152	0
cg02232922	X	118532809	F	SLC25A43	TSS1500	1.92139	0.0239731	0	1.81652	0.0253677	0
cg02233493	X	130217383	F	FLJ30058	Body	1.65604	0.0305197	0	1.63774	0.0317618	0
cg02239640	X	51487529	F	GSPT2	1stExon	1.46726	0.0252007	0	1.48991	0.0255393	0
cg02261899	X	125686940	R	DCAF12L1	TSS200	1.65851	0.0270147	0	1.58096	0.027625	0
cg02263675	X	84500028	R	ZNF711	5'UTR	1.89782	0.0205911	0	1.88124	0.0216695	0
cg02264182	X	148586734	R	IDS	1stExon	2.11205	0.0118219	0	2.09289	0.0126305	0
cg02264284	X	133594951	F	HPRT1	Body	2.04271	0.0190576	0	1.99857	0.019289	0
cg02265919	X	100075240	R	CSTF2	TSS200	2.08836	0.0138384	0	2.08391	0.013898	0
cg02266197	X	133370918	F	CCDC160	TSS200	1.82246	0.0250422	0	1.86628	0.0254762	0
cg02268650	X	68348465	R			1.54801	0.0320626	0	1.55713	0.0329512	0
cg02274705	X	119763815	F	C1GALT1C1	1stExon	2.07867	0.0117784	0	2.07616	0.0102657	0
cg02276461	X	132092575	R	HS6ST2	Body	2.04239	0.0136058	0	1.99936	0.0151023	0
cg02283106	X	15756052	R	CA5B	TSS1500	1.84339	0.0269984	0	1.79075	0.027875	0
cg02283535	X	103811660	F	IL1RAPL2	5'UTR	2.00682	0.0150852	0	1.96079	0.0148076	0
cg02285254	X	135229382	F	FHL1	Body	2.05321	0.0138278	0	2.03184	0.0144855	0
cg02285579	X	106516174	F			2.03127	0.016194	0	1.95805	0.0171122	0
cg02286623	X	17879424	R	RAI2	5'UTR	1.89423	0.0237081	0	1.86559	0.0241214	0
cg02288667	X	135991582	F			2.13451	0.00978009	0	2.11625	0.009574	0
cg02291897	X	47509947	F	ELK1	5'UTR	2.08629	0.0125923	0	2.07311	0.0128392	0
cg02293258	X	57147872	F	SPIN2B	5'UTR	2.08098	0.0129602	0	2.06131	0.0134458	0
cg02295369	X	117959263	R	ZCCHC12	Body	1.87873	0.0191414	0	1.89042	0.0196935	0
cg02295504	X	100878362	F	ARMCX3	5'UTR	2.10762	0.0102553	0	2.09253	0.0101596	0
cg02301364	X	106871826	F	PRPS1	1stExon	2.09499	0.0109287	0	2.07162	0.0108767	0
cg02308199	X	129063773	R			-1.6014	0.0312374	0	-1.58256	0.030495	0
cg02311013	X	48619642	R	GLOD5	TSS1500	-1.52134	0.0313845	0	-1.38848	0.034645	0
cg02318959	X	129535800	F	RBMX2	TSS200	1.97345	0.0177927	0	1.96289	0.0190649	0
cg02325951	14	89878619	R	FOXN3	Body	-1.62842	0.0278387	0	-1.67137	0.0279308	0
cg02326006	X	62974433	F	ARHGEF9	1stExon	2.06494	0.0145191	0	2.03789	0.0140049	0
cg02327549	X	105066292	R	NRK	TSS1500	1.72786	0.0258962	0	1.69372	0.0268372	0
cg02330362	X	70402012	F			2.05652	0.0140264	0	2.03618	0.01451	0
cg02332456	X	37026473	R	FAM47C	1stExon	-1.40604	0.0356182	0	-1.47807	0.036256	0
cg02333283	X	153707099	R	LAGE3	1stExon	2.03101	0.01552	0	1.98426	0.0162909	0
cg02336608	X	18693859	F			1.78355	0.0258141	0	1.76586	0.0271724	0
cg02337670	X	48815787	F	OTUD5	TSS1500	2.12139	0.012344	0	2.08253	0.012844	0
cg02354343	X	131351392	R	RAP2C	5'UTR	2.01742	0.0170671	0	1.98747	0.016998	0
cg02360578	X	105855130	R	CXorf57	TSS200	2.05614	0.0125102	0	2.00621	0.0133208	0
cg02376524	X	101967145	R	GPRASP2	TSS200	2.03421	0.0160296	0	2.00137	0.0165894	0
cg02379437	X	72435117	F	NAP1L2	TSS1500	1.87021	0.0233347	0	1.85874	0.0218801	0
cg02386310	X	48367223	R	PORCN	TSS200	2.07289	0.0146953	0	2.0725	0.0145664	0
cg02395364	X	74493592	F	UPRT	TSS1500	2.0249	0.01794	0	1.9796	0.018753	0
cg02402307	X	15511684	F	PIR	TSS1500	1.91323	0.0193842	0	1.90681	0.0194345	0
cg02416822	X	136112268	F			-1.7005	0.0268493	0	-1.59564	0.0288481	0
cg02417823	X	21958684	F	SMS	TSS200	1.79734	0.0247845	0	1.80269	0.0253767	0
cg02433685	X	149716604	R			1.25985	0.0309478	0	1.27527	0.0324701	0
cg02437314	X	71521494	R	CITED1	3'UTR	-1.50216	0.0331777	0	-1.48742	0.0337551	0
cg02438576	X	153697531	R	PLXNA3	Body	-1.88124	0.0207475	0	-1.85786	0.0212329	0
cg02447370	X	132092772	R	HS6ST2	5'UTR	1.83931	0.0227971	0	1.78565	0.0234593	0
cg02454309	X	103401252	R	MCART6	5'UTR	2.0815	0.0141357	0	2.04423	0.0146439	0
cg02456261	X	117479353	F	WDR44	TSS1500	1.98453	0.0197332	0	1.93575	0.0192973	0
cg02458532	X	150343097	F			1.82083	0.0267705	0	1.80302	0.0272427	0
cg02459704	X	153084910	F	PDZD4	Body	1.94533	0.0205248	0	1.91148	0.0219426	0
cg02480419	X	48815856	F	OTUD5	TSS1500	2.06068	0.0126106	0	2.05085	0.0124826	0
cg02492445	X	136631809	R			1.85351	0.022668	0	1.78406	0.0241432	0
cg02492740	X	56590362	F	UBQLN2	1stExon	2.05174	0.0156185	0	2.01152	0.015777	0
cg02496423	X	21958619	R	SMS	TSS1500	2.07898	0.0130176	0	2.06232	0.0140605	0
cg02497062	X	69352975	F	IGBP1	TSS1500	1.92204	0.020841	0	1.90766	0.0214161	0
cg02498747	X	153401597	F			1.56543	0.0294883	0	1.52174	0.0303723	0
cg02501924	X	99891813	F	TSPAN6	TSS200	2.00653	0.0188449	0	1.95556	0.0183756	0
cg02505036	X	133675433	R	MIR450A1	TSS1500	-1.63265	0.0259149	0	-1.61759	0.0267771	0
cg02506527	X	39868153	R			1.6037	0.0300417	0	1.54846	0.0317871	0
cg02510708	X	123095692	F	STAG2	1stExon	2.133	0.00989793	0	2.10885	0.00969265	0
cg02512611	X	50557800	F	SHROOM4	TSS1500	-1.38604	0.0298025	0	-1.32822	0.0324601	0
cg02514307	X	148716330	F			-1.75184	0.0279165	0	-1.73782	0.0286129	0
cg02522370	X	12992795	R	TMSL3	TSS1500	1.99003	0.0193982	0	1.95319	0.0193409	0
cg02523105	X	134232832	F	NCRNA00087	TSS200	2.08359	0.013692	0	2.0449	0.0137292	0
cg02533866	X	37545375	F	XK	1stExon	2.09412	0.0116349	0	2.04615	0.0120916	0
cg02538330	X	47004146	F	NDUFB11	Body	2.08333	0.0131375	0	2.07166	0.0129948	0
cg02539591	X	24483092	R	PDK3	TSS1500	2.05825	0.0141296	0	2.05085	0.0140368	0
cg02540440	X	39866758	F			-1.89448	0.0232426	0	-1.89398	0.0244819	0
cg02540826	X	19002582	F	PHKA2	TSS200	2.0411	0.0140193	0	2.03282	0.0140692	0
cg02547323	X	103087380	F	RAB9B	TSS200	1.85211	0.0228078	0	1.82823	0.0233115	0
cg02556954	5	137848577	R	ETF1	Body	-1.81677	0.0254508	0	-1.83038	0.0262867	0
cg02559685	X	38663484	F	MID1IP1	5'UTR	2.10129	0.0132349	0	2.08403	0.0135669	0
cg02560273	X	71371655	R	FLJ44635	Body	-1.49742	0.0357574	0	-1.4397	0.0363649	0
cg02573613	X	48814806	F	OTUD5	5'UTR	2.12426	0.0112261	0	2.10208	0.0113272	0
cg02579620	X	152988658	F	BCAP31	Body	2.07529	0.0141816	0	2.04884	0.0145458	0
cg02581727	X	134478016	F	ZNF449	TSS1500	2.07942	0.0147592	0	2.06286	0.0147628	0
cg02583883	X	112083504	F	AMOT	5'UTR	1.74249	0.0268292	0	1.72243	0.0277819	0
cg02586883	X	21393898	R	CNKSR2	Body	1.46773	0.0341882	0	1.40218	0.0362515	0
cg02587153	X	56589768	R	UBQLN2	TSS1500	1.86904	0.0251155	0	1.826	0.0262666	0
cg02589074	X	148586938	R	IDS	TSS200	2.07801	0.0130692	0	2.03671	0.0155569	0
cg02590710	X	56258440	R	KLF8	TSS1500	1.61784	0.0279197	0	1.60927	0.0284789	0
cg02597128	X	106449823	F	CXorf41	TSS200	1.92204	0.0212481	0	1.88772	0.0224765	0
cg02599583	X	134155241	F	FAM127C	1stExon	-1.52177	0.0344357	0	-1.4736	0.0353315	0
cg02600772	X	80259473	R			-1.73679	0.0260219	0	-1.74907	0.0274603	0
cg02602528	X	49028148	R	PLP2	TSS200	2.07986	0.0121771	0	2.07769	0.0115138	0
cg02603022	X	39547825	R			1.76403	0.0273002	0	1.70244	0.0295416	0
cg02604836	X	154032629	F	MPP1	5'UTR	1.07708	0.0252884	0	1.06818	0.0273647	0
cg02606018	12	10658281	R			-1.435	0.0302069	0	-1.41566	0.0299518	0
cg02611122	X	153247499	R	TMEM187	5'UTR	2.04714	0.0163481	0	2.02515	0.0167949	0
cg02615131	X	152066735	F			2.02727	0.0150756	0	2.00669	0.016243	0
cg02616921	X	69455617	R	AWAT1	Body	-1.43679	0.0331099	0	-1.41916	0.0341492	0
cg02621658	X	67867676	F	STARD8	1stExon	2.07989	0.0126763	0	2.05527	0.0122508	0
cg02623256	X	24483231	F	PDK3	TSS200	2.11489	0.0110423	0	2.103	0.0108094	0
cg02623604	X	150067276	R	CD99L2	TSS200	1.7439	0.0267313	0	1.73167	0.0279968	0
cg02624484	X	24043392	R	KLHL15	5'UTR	2.04224	0.0162225	0	2.05027	0.0156151	0
cg02626719	X	100914838	F	ARMCX2	1stExon	1.67662	0.0231436	0	1.67252	0.023402	0
cg02629737	X	138285540	R	FGF13	5'UTR	1.71994	0.0232897	0	1.71133	0.0244655	0
cg02634083	X	150153136	R	HMGB3	5'UTR	2.12019	0.00906199	0	2.08996	0.00917649	0
cg02634141	X	146313213	R	MIR507	TSS1500	-1.7169	0.0213782	0	-1.63135	0.0230623	0
cg02634916	X	122866442	F	THOC2	Body	2.10776	0.0113125	0	2.09228	0.0110462	0
cg02637882	X	129338226	F	ZNF280C	3'UTR	-1.73539	0.0288143	0	-1.67758	0.029836	0
cg02645343	X	134656105	R	DDX26B	Body	2.06831	0.0149787	0	2.03218	0.0156727	0
cg02647401	X	11775785	R	MSL3	TSS1500	2.10184	0.0119131	0	2.0865	0.0119094	0
cg02649608	X	119384792	R	ZBTB33	5'UTR	2.10698	0.0105645	0	2.09586	0.0097666	0
cg02651788	X	25031208	F	ARX	Body	2.08485	0.012977	0	2.04518	0.0129827	0
cg02675179	16	20686073	R	ACSM1	Body	1.06234	0.0216498	0	1.08086	0.0239275	0
cg02678356	X	57937004	F	ZXDA	1stExon	2.06985	0.0138525	0	2.03607	0.0145323	0
cg02693068	X	39941630	R	BCOR	5'UTR	-2.03563	0.0129822	0	-2.03601	0.0125461	0
cg02698615	X	135580098	F	HTATSF1	Body	2.08078	0.0115108	0	2.06479	0.0114497	0
cg02699127	X	129065551	R			1.90682	0.0225192	0	1.91256	0.0235289	0
cg02710173	X	153603482	R	FLNA	TSS1500	-1.61594	0.0319379	0	-1.57114	0.0329064	0
cg02714202	X	55515315	F	USP51	Body	2.04527	0.0154025	0	2.00889	0.0161426	0
cg02714462	X	30265188	F	MAGEB1	TSS200	-1.74898	0.0302557	0	-1.75313	0.030923	0
cg02714492	X	68836610	F	EDA	3'UTR	2.03674	0.0161904	0	2.01416	0.0168443	0
cg02725485	X	30577300	R	CXorf21	3'UTR	-1.64104	0.0312482	0	-1.60732	0.0329693	0
cg02725692	X	48367969	F	PORCN	5'UTR	1.84305	0.0258635	0	1.84243	0.0271059	0
cg02726808	X	38211886	R	OTC	1stExon	-1.57924	0.0318938	0	-1.52383	0.0337751	0
cg02732801	X	152066328	F			2.0729	0.0130342	0	2.04223	0.0141089	0
cg02734755	X	53710671	F	HUWE1	5'UTR	2.01767	0.0170243	0	2.00533	0.0169524	0
cg02741829	X	19443222	R	MAP3K15	Body	1.67518	0.0254427	0	1.58335	0.0285084	0
cg02742139	X	153776358	R	IKBKG	5'UTR	1.98388	0.0198089	0	1.95776	0.0207157	0
cg02742918	X	153284103	F	IRAK1	Body	1.68408	0.0276675	0	1.70238	0.0284293	0
cg02742990	X	24665458	R	PCYT1B	TSS200	2.07129	0.0148928	0	2.03452	0.0155238	0
cg02743552	X	148550982	R			-1.50533	0.0331938	0	-1.48818	0.0356309	0
cg02756511	X	106693692	R			2.10533	0.0110638	0	2.0817	0.0113382	0
cg02758552	3	49395714	F	GPX1	1stExon	1.28803	0.0309358	0	1.31106	0.0309157	0
cg02770249	X	119603233	R	LAMP2	TSS200	2.11343	0.00987844	0	2.0832	0.010242	0
cg02770794	X	39872204	R			1.96341	0.0192906	0	1.9105	0.0207539	0
cg02772106	X	152992265	F	ABCD1	Body	1.95791	0.0165161	0	1.96463	0.0169819	0
cg02773050	X	134654287	R	DDX26B	TSS1500	1.96537	0.0192636	0	1.95166	0.0198856	0
cg02773151	X	107069063	R	MID2	TSS200	1.95951	0.0204428	0	1.92758	0.0205582	0
cg02775175	X	68048001	R	EFNB1	TSS1500	2.09471	0.0123845	0	2.06213	0.0125211	0
cg02779729	X	128631361	R	SMARCA1	Body	-1.85669	0.0209	0	-1.81915	0.0222036	0
cg02791948	X	153236083	F	HCFC1	Body	2.00121	0.0183316	0	1.98853	0.0190435	0
cg02799972	X	47383109	F			2.0184	0.0182678	0	1.99574	0.0183812	0
cg02803670	X	134478751	R	ZNF75D	TSS1500	2.04332	0.0144408	0	2.03751	0.014727	0
cg02804166	X	133506996	F	PHF6	TSS1500	2.06443	0.0174936	0	2.04663	0.0179479	0
cg02804757	X	138285861	F	FGF13	5'UTR	1.77041	0.0248423	0	1.70893	0.0246631	0
cg02805922	X	64255552	F			2.11044	0.0103576	0	2.09215	0.010469	0
cg02819256	X	152938698	F	PNCK	Body	1.77323	0.026891	0	1.75224	0.0280304	0
cg02819404	X	52006312	R			-1.69485	0.0251655	0	-1.6693	0.0259412	0
cg02821380	X	135579081	R	HTATSF1	TSS1500	2.09265	0.0138195	0	2.07143	0.0140712	0
cg02830187	X	152906667	F	DUSP9	TSS1500	1.6172	0.0278457	0	1.58114	0.0289827	0
cg02830865	X	124339930	R			1.69291	0.0302661	0	1.65917	0.0313047	0
cg02836821	X	132095360	F	HS6ST2	5'UTR	-1.85879	0.0226984	0	-1.78689	0.0252567	0
cg02839824	X	119133091	R			1.87454	0.0238868	0	1.84159	0.0255759	0
cg02847500	X	139587184	F	SOX3	1stExon	1.87689	0.0227493	0	1.85372	0.0236095	0
cg02853686	X	21858179	R	MBTPS2	Body	2.0712	0.0151834	0	2.03368	0.0151731	0
cg02856792	X	48769319	F	SLC35A2	TSS200	2.07084	0.0147507	0	2.05357	0.0158379	0
cg02857405	X	39684999	R			-1.73993	0.0277247	0	-1.78157	0.0280945	0
cg02858817	X	26155148	R	MAGEB18	TSS1500	-1.35403	0.0316617	0	-1.28427	0.0314461	0
cg02859554	X	19140359	F	GPR64	5'UTR	2.02572	0.0170987	0	1.97936	0.0182758	0
cg02864732	X	130192365	F	FLJ30058	1stExon	1.9799	0.0171279	0	1.94248	0.0173682	0
cg02869694	X	153775262	F	IKBKG	TSS1500	2.1048	0.0109308	0	2.08095	0.0116237	0
cg02871887	X	153626455	R	RPL10	TSS200	2.11695	0.00919875	0	2.10177	0.00878434	0
cg02875834	X	95939848	R	DIAPH2	5'UTR	1.91719	0.0218507	0	1.88822	0.0220607	0
cg02879223	X	69672415	R	DLG3	5'UTR	1.93122	0.0212391	0	1.89045	0.0221801	0
cg02881531	X	62647796	F	LOC92249	Body	-1.80193	0.0258211	0	-1.81108	0.0255749	0
cg02882301	X	49126157	F	PPP1R3F	TSS200	2.02278	0.016456	0	1.99417	0.0166511	0
cg02883100	X	53460671	F	HSD17B10	Body	1.43584	0.0319929	0	1.43948	0.0356204	0
cg02890812	X	129114962	R			2.02011	0.0166016	0	1.9994	0.0176864	0
cg02895192	X	153190027	F	ARHGAP4	Body	2.00355	0.0198177	0	1.99313	0.0191122	0
cg02896361	X	47441581	R	SYN1	Body	1.80824	0.0257799	0	1.77817	0.0267245	0
cg02896496	X	54385394	F	WNK3	TSS1500	2.08127	0.0128114	0	2.05196	0.0126949	0
cg02902015	X	129194509	R			2.08551	0.0125208	0	2.07593	0.012666	0
cg02904064	X	63616177	R	MTMR8	TSS1500	-1.5166	0.0343665	0	-1.47095	0.0351067	0
cg02904184	X	40126247	F			1.89114	0.0239676	0	1.85465	0.0259974	0
cg02907441	X	37026364	R	FAM47C	TSS200	-1.63594	0.0294287	0	-1.6242	0.0317849	0
cg02908189	8	146176269	F	ZNF16	1stExon	1.53166	0.033358	0	1.53707	0.0338373	0
cg02909397	X	20284697	F	RPS6KA3	1stExon	2.05966	0.0156857	0	2.02521	0.016244	0
cg02912158	X	136649808	R	ZIC3	1stExon	1.99807	0.017977	0	1.94991	0.0182784	0
cg02915422	X	150863331	F			1.85725	0.0223407	0	1.81898	0.0229734	0
cg02921294	X	103217051	F	MIR1256	Body	1.72282	0.0268662	0	1.70259	0.0278218	0
cg02921434	X	146993433	R	ASFMR1	Body	2.11759	0.0098541	0	2.07964	0.00970423	0
cg02923300	X	68759322	R			-1.51621	0.0337499	0	-1.44224	0.0355488	0
cg02929371	X	43741601	F	MAOB	1stExon	1.95155	0.0214758	0	1.92574	0.0223398	0
cg02931660	X	40002443	R	BCOR	5'UTR	-1.74705	0.0258459	0	-1.77622	0.0267795	0
cg02932805	X	40031550	F	BCOR	5'UTR	1.97246	0.0185264	0	1.94477	0.0195061	0
cg02934281	X	100075531	R	CSTF2	Body	2.02093	0.0172468	0	1.99941	0.0177631	0
cg02936290	X	135962199	F	RBMX	Body	1.15922	0.0293907	0	1.1771	0.0305355	0
cg02937293	X	49687792	R	CLCN5	5'UTR	2.08551	0.0106003	0	2.04576	0.010723	0
cg02938958	X	25022847	R	ARX	Body	1.94969	0.0183192	0	1.94625	0.018902	0
cg02939364	X	18443708	R	CDKL5	TSS200	1.95262	0.0211446	0	1.94149	0.0213212	0
cg02940028	X	100306693	F	TRMT2B	5'UTR	2.06039	0.015931	0	2.05998	0.0163247	0
cg02940221	X	153536952	F	TKTL1	Body	2.03079	0.0155119	0	2.01624	0.0160369	0
cg02944422	X	47696228	R	ZNF81	TSS200	2.09672	0.0124632	0	2.08304	0.0128607	0
cg02952729	X	47489470	R	CFP	5'UTR	2.02982	0.0171136	0	1.99511	0.0178066	0
cg02954623	X	84258791	R	APOOL	TSS200	2.00942	0.0155538	0	1.95874	0.0161242	0
cg02969243	X	11445762	F	ARHGAP6	Body	1.95672	0.0193732	0	1.94686	0.0199984	0
cg02971902	X	135991927	R			2.05632	0.0139458	0	2.02557	0.0140307	0
cg02973971	X	149106460	F	LOC100272228	TSS1500	2.11319	0.010369	0	2.0924	0.00996033	0
cg02975846	X	51075126	F	NUDT10	5'UTR	1.93847	0.019355	0	1.92125	0.0204744	0
cg02977829	X	40482442	R			-1.57444	0.0278851	0	-1.5043	0.0295848	0
cg02987832	14	35761633	F	PSMA6	1stExon	-1.72422	0.020741	0	-1.67354	0.0226447	0
cg02994237	X	137750892	F	FGF13	Body	-1.28704	0.027057	0	-1.22281	0.0290685	0
cg02994943	X	154033409	F	MPP1	5'UTR	2.04799	0.0144727	0	2.02537	0.0140437	0
cg02997061	X	40126573	R			1.69858	0.0286906	0	1.62664	0.0300267	0
cg02998933	X	100640796	R	BTK	5'UTR	1.24568	0.0238849	0	1.25824	0.0243604	0
cg03003036	X	47038480	R	RBM10	Body	-1.74401	0.0274914	0	-1.65031	0.0293365	0
cg03003060	X	13956166	R	GPM6B	Body	1.59844	0.0317646	0	1.55379	0.0335852	0
cg03008405	X	153190589	F	ARHGAP4	Body	2.07956	0.0150423	0	2.0521	0.0154584	0
cg03010388	X	18693162	R			2.09511	0.0129518	0	2.06642	0.0127128	0
cg03019024	X	75392955	R	CXorf26	5'UTR	2.06016	0.0142366	0	2.05351	0.0140979	0
cg03020597	X	144898810	R	SLITRK2	TSS1500	1.97887	0.0205331	0	1.96223	0.0216178	0
cg03024957	X	106693522	R			2.04208	0.0133378	0	2.00202	0.0137009	0
cg03025340	X	153716662	F	SLC10A3	Body	-1.45957	0.0310993	0	-1.47345	0.0323632	0
cg03026311	X	100075083	F	CSTF2	TSS1500	2.07136	0.0155025	0	2.03967	0.0153924	0
cg03028216	X	20431329	R			2.08754	0.0137679	0	2.06939	0.0137162	0
cg03028851	X	153996718	F	DKC1	Body	-1.72013	0.0267067	0	-1.71514	0.0272426	0
cg03031357	X	21959700	R	SMS	Body	2.02383	0.015004	0	1.99832	0.0150129	0
cg03035653	X	99662932	R	PCDH19	1stExon	1.73855	0.0259336	0	1.70463	0.0263297	0
cg03038395	X	25031600	F	ARX	Body	2.081	0.0118147	0	2.06416	0.0116084	0
cg03039483	X	83757499	R	HDX	TSS200	1.98315	0.0193077	0	1.93323	0.020026	0
cg03040210	X	131624077	R	MBNL3	TSS200	2.13748	0.0107933	0	2.11454	0.0110697	0
cg03044250	X	46302684	F			-1.57075	0.0302656	0	-1.47852	0.0331208	0
cg03046946	X	152735584	F	HAUS7	Body	2.06336	0.0162067	0	2.04276	0.0161835	0
cg03050491	X	153285654	F	IRAK1	TSS1500	2.10013	0.010898	0	2.07353	0.0116879	0
cg03055372	X	73641073	R	SLC16A2	TSS200	1.79423	0.0272103	0	1.79861	0.0279552	0
cg03056321	X	71352048	R	NHSL2	Body	2.08185	0.0127924	0	2.0504	0.0136577	0
cg03056849	X	149861683	F	MTMR1	TSS200	2.122	0.0094412	0	2.10428	0.0093693	0
cg03057808	X	105855296	F	CXorf57	1stExon	2.07667	0.0118521	0	2.06389	0.01155	0
cg03088756	X	40011385	F	BCOR	5'UTR	-1.84759	0.0211339	0	-1.85057	0.0212255	0
cg03094405	X	11284830	R	ARHGAP6	Body	-1.3939	0.0302421	0	-1.37999	0.0306589	0
cg03096488	X	66765289	F	AR	1stExon	2.07853	0.0131561	0	2.03588	0.0138421	0
cg03100923	X	138285922	F	FGF13	5'UTR	1.90916	0.0196824	0	1.87506	0.0201042	0
cg03102729	X	120181504	R	GLUD2	5'UTR	1.67308	0.0246476	0	1.63266	0.0261019	0
cg03104298	X	135579224	F	HTATSF1	TSS1500	2.07051	0.0110665	0	2.06124	0.0106078	0
cg03120461	X	12993214	F	TMSB4X	TSS200	2.07989	0.0118116	0	2.0411	0.0130327	0
cg03121419	X	125687720	F	DCAF12L1	TSS1500	-1.80547	0.0235091	0	-1.75758	0.0249571	0
cg03122511	X	119077820	R	NKAP	TSS200	2.06327	0.0166632	0	2.06228	0.0161299	0
cg03128268	X	48432279	F	RBM3	TSS1500	1.46836	0.0321238	0	1.4536	0.0340273	0
cg03130686	X	64708843	F	ZC3H12B	1stExon	-1.46776	0.0331559	0	-1.39591	0.0343981	0
cg03147775	X	11775722	F	MSL3	TSS1500	2.07229	0.0148428	0	2.04485	0.0146573	0
cg03157806	X	148713279	R	TMEM185A	5'UTR	2.09089	0.0117469	0	2.05945	0.0113889	0
cg03161453	X	39962049	F	BCOR	5'UTR	-2.06546	0.0161546	0	-2.05508	0.016589	0
cg03164831	X	80065461	F	BRWD3	TSS1500	2.08635	0.0135498	0	2.07053	0.0138554	0
cg03171708	X	16889152	F	RBBP7	TSS1500	2.04286	0.0124514	0	2.01565	0.0130978	0
cg03172171	X	154254936	R	FUNDC2	TSS200	1.99049	0.0183374	0	1.99569	0.0190626	0
cg03176466	X	35937778	R	CXorf22	TSS200	1.79979	0.0247038	0	1.76906	0.025199	0
cg03177323	X	153236770	F	HCFC1	1stExon	1.47176	0.0346951	0	1.48414	0.0354776	0
cg03181214	X	100646162	R	RPL36A	Body	2.11508	0.0125175	0	2.08948	0.0125924	0
cg03189022	X	153237590	F	TMEM187	TSS1500	1.95506	0.0188361	0	1.9203	0.0197219	0
cg03191149	X	106161946	R	CLDN2	5'UTR	-1.36127	0.0292824	0	-1.30641	0.0297797	0
cg03191359	X	38187009	F	RPGR	TSS1500	2.09752	0.0145439	0	2.07558	0.0142568	0
cg03199955	X	30671630	F	GK	1stExon	2.02235	0.018645	0	2.03603	0.0189679	0
cg03202526	X	139587311	F	SOX3	TSS200	2.05314	0.0142003	0	2.0086	0.0139253	0
cg03204600	X	62975269	R	ARHGEF9	TSS1500	1.55794	0.035042	0	1.52689	0.0366366	0
cg03206476	X	45240562	F			-1.47968	0.0326704	0	-1.50868	0.0331256	0
cg03210912	X	153719169	F	SLC10A3	TSS200	2.08694	0.0132044	0	2.08693	0.0126142	0
cg03212133	X	135057092	R	MMGT1	TSS1500	1.8653	0.023154	0	1.82276	0.0244142	0
cg03213202	X	70474012	F	ZMYM3	5'UTR	1.92476	0.0196256	0	1.93339	0.0200763	0
cg03213502	X	69501023	F	ARR3	Body	-1.85849	0.025336	0	-1.8447	0.0258053	0
cg03218192	17	33914403	R	AP2B1	1stExon	1.34392	0.0291577	0	1.40431	0.0301151	0
cg03219705	X	38420578	F	TSPAN7	TSS200	2.10284	0.00979599	0	2.07623	0.00988647	0
cg03221436	X	48916091	F	CCDC120	TSS1500	-1.83514	0.0245843	0	-1.7875	0.0250317	0
cg03244432	X	48367513	R	PORCN	5'UTR	2.08556	0.0119025	0	2.06382	0.0118369	0
cg03244736	X	114252923	R	IL13RA2	TSS1500	-1.75008	0.0281689	0	-1.68907	0.0286017	0
cg03245429	X	114524308	F	LUZP4	1stExon	-1.97288	0.0215839	0	-1.97182	0.0227019	0
cg03250346	X	24042976	F	KLHL15	5'UTR	2.07945	0.0124367	0	2.06466	0.0124572	0
cg03250911	X	153236396	F	HCFC1	1stExon	1.79488	0.0267547	0	1.74064	0.029301	0
cg03252296	X	31283706	R	DMD	Body	-1.55109	0.0301584	0	-1.53226	0.0312398	0
cg03266942	X	24712207	R	POLA1	Body	1.97719	0.0206527	0	1.91852	0.0219295	0
cg03267527	X	102510314	R	TCEAL8	TSS200	1.96153	0.0201413	0	1.95732	0.0209561	0
cg03272642	X	69509773	R	PDZD11	1stExon	2.12119	0.00966905	0	2.09982	0.0096555	0
cg03273606	X	101854301	F	ARMCX5	5'UTR	2.02913	0.016832	0	1.99443	0.0172895	0
cg03273615	X	106362373	R	RBM41	TSS1500	1.87814	0.0255305	0	1.81311	0.0262232	0
cg03273694	X	131156448	R	MST4	TSS1500	1.80671	0.0275998	0	1.74457	0.0293914	0
cg03280420	X	73640648	R	SLC16A2	TSS1500	2.06795	0.0134066	0	2.05262	0.0141941	0
cg03291819	X	17874725	F	RAI2	5'UTR	-1.64463	0.0286906	0	-1.6216	0.0308021	0
cg03305185	X	134429653	R	ZNF75D	5'UTR	1.46219	0.0354311	0	1.48233	0.0361555	0
cg03310203	X	151806811	R	GABRQ	Body	1.87628	0.0206809	0	1.80257	0.0216558	0
cg03315431	X	153032930	F	PLXNB3	Body	-1.73633	0.0272573	0	-1.77572	0.0267578	0
cg03317455	X	43514740	F	MAOA	TSS1500	2.05948	0.016272	0	2.01552	0.0169231	0
cg03319489	X	53713873	F	HUWE1	TSS1500	2.12665	0.0108321	0	2.1004	0.011071	0
cg03321558	X	148709321	R	TMEM185A	Body	-1.97698	0.0174462	0	-1.91906	0.0187636	0
cg03323437	X	54835446	R	MAGED2	5'UTR	2.08693	0.0117228	0	2.06744	0.0118854	0
cg03327000	X	102884633	R	TCEAL1	5'UTR	1.88761	0.0252742	0	1.87208	0.0265503	0
cg03328165	X	71131891	F	NHSL2	Body	1.63176	0.0306052	0	1.58457	0.0320428	0
cg03331695	X	102775412	R	RAB40A	TSS1500	-1.72181	0.026771	0	-1.70991	0.0277968	0
cg03332892	X	9980397	F			-1.91278	0.0218704	0	-1.87843	0.0228684	0
cg03334316	X	54209370	R	FAM120C	1stExon	2.10347	0.0123778	0	2.08765	0.0118991	0
cg03335173	X	151806923	R	GABRQ	Body	2.07275	0.0132934	0	2.043	0.0134484	0
cg03341064	X	48828399	F	KCND1	TSS200	1.48037	0.0348657	0	1.47659	0.0360251	0
cg03347749	X	102565889	F	BEX2	1stExon	2.06609	0.0137769	0	2.04309	0.0148215	0
cg03350825	X	68442327	R			1.7835	0.0273369	0	1.74599	0.0286488	0
cg03351894	X	48686200	R	ERAS	TSS1500	1.64711	0.026185	0	1.6065	0.0279847	0
cg03353482	X	74743466	F	ZDHHC15	TSS200	1.88413	0.0193096	0	1.83961	0.0200504	0
cg03356806	X	120181820	R	GLUD2	1stExon	1.56389	0.0319517	0	1.56652	0.0331737	0
cg03359503	X	154563952	R	CLIC2	5'UTR	1.71275	0.027432	0	1.68901	0.0289906	0
cg03360374	X	48980258	R	GPKOW	TSS200	1.83066	0.0256018	0	1.82416	0.0257874	0
cg03363535	X	101771438	R	TMSB15A	5'UTR	2.05491	0.014192	0	2.03895	0.0141787	0
cg03364121	X	119379165	F	CXorf42	TSS200	2.08658	0.0139679	0	2.0442	0.0136326	0
cg03370193	X	31284813	F	DMD	Body	2.06662	0.0131519	0	2.04846	0.0130947	0
cg03372815	X	150067397	R	CD99L2	TSS1500	2.04481	0.0155857	0	2.02785	0.015431	0
cg03375088	X	148712409	F	TMEM185A	Body	-1.44686	0.0343296	0	-1.4406	0.035031	0
cg03391801	X	153607825	F	EMD	5'UTR	2.07168	0.0140036	0	2.06535	0.0143318	0
cg03422380	X	107019244	R	TSC22D3	TSS1500	2.05161	0.0139469	0	2.06022	0.0128692	0
cg03423123	X	134125181	R	LOC644538	1stExon	2.07049	0.0149058	0	2.04108	0.0151624	0
cg03424637	X	147582939	R	AFF2	Body	2.0849	0.0118609	0	2.07437	0.0114687	0
cg03435878	X	103809620	F	IL1RAPL2	TSS1500	1.90304	0.0243056	0	1.81902	0.0263287	0
cg03440272	X	51139066	F			2.00332	0.0154744	0	1.98089	0.0167339	0
cg03445679	X	131626187	R			-1.60943	0.0311294	0	-1.57525	0.0308056	0
cg03447800	X	103499585	R	ESX1	5'UTR	1.94754	0.018131	0	1.97057	0.0184867	0
cg03450733	X	25024314	F	ARX	Body	1.76429	0.0278365	0	1.67349	0.028887	0
cg03455762	X	128873475	F	XPNPEP2	Body	1.214	0.0285136	0	1.21167	0.0304431	0
cg03460546	X	128788127	F	APLN	Body	1.89945	0.0202529	0	1.86662	0.0204062	0
cg03460558	X	128657473	R	SMARCA1	TSS200	2.03922	0.0152725	0	2.01326	0.0151829	0
cg03464416	X	153626979	R	RPL10	Body	1.95798	0.0182024	0	1.94532	0.0189321	0
cg03470745	X	139592512	R			1.82737	0.0251745	0	1.79086	0.0252673	0
cg03477368	X	10092308	R	WWC3	Body	-1.4859	0.0345803	0	-1.53184	0.0345657	0
cg03485809	X	102862945	R	TCEAL3	1stExon	2.06464	0.0155503	0	2.02933	0.0149746	0
cg03487706	X	54666256	R			2.10194	0.0125232	0	2.07616	0.0122093	0
cg03505772	X	72299310	F	PABPC1L2A	5'UTR	2.03203	0.0161813	0	1.9673	0.0159151	0
cg03509565	X	38080425	F	SRPX	TSS1500	1.96783	0.0203088	0	1.96192	0.0206353	0
cg03513471	X	146993485	R	ASFMR1	Body	2.08471	0.0116892	0	2.0589	0.0125772	0
cg03514678	X	148586584	R	IDS	1stExon	1.7056	0.030177	0	1.69383	0.0310511	0
cg03517379	X	118740406	F	NKRF	TSS1500	2.09849	0.00965836	0	2.07066	0.0102538	0
cg03523119	X	85302864	R	CHM	TSS1500	1.59195	0.0325001	0	1.50962	0.0340555	0
cg03523199	X	133593973	F	HPRT1	TSS1500	2.09797	0.011892	0	2.08489	0.0117784	0
cg03536032	X	11683383	R	ARHGAP6	1stExon	2.01804	0.0156135	0	1.99791	0.0159686	0
cg03537243	X	106449730	F	CXorf41	TSS200	2.1178	0.0114438	0	2.0751	0.0113909	0
cg03552552	X	73512004	F	NCRNA00182	Body	1.81382	0.0271607	0	1.78841	0.0273487	0
cg03554089	X	73071041	F	XIST	Body	-1.88909	0.0243096	0	-1.83816	0.0248451	0
cg03558222	X	47483257	R			2.08675	0.013007	0	2.04339	0.0141776	0
cg03575468	X	19362613	F	PDHA1	Body	1.94817	0.0189599	0	1.89907	0.0196538	0
cg03576039	X	133306349	F			2.105	0.0110623	0	2.08477	0.0116313	0
cg03576235	X	26576430	R	VENTXP1	TSS200	-1.56678	0.0329446	0	-1.53999	0.034612	0
cg03577944	X	106694654	R			1.9867	0.0191244	0	1.96208	0.0201431	0
cg03580328	X	73641615	F	SLC16A2	1stExon	2.07167	0.0144367	0	2.06288	0.0140148	0
cg03590418	X	153570171	F			2.06484	0.0142055	0	2.04326	0.0144446	0
cg03595428	X	154299274	R	MTCP1	1stExon	2.05417	0.013938	0	2.02745	0.0144346	0
cg03598440	X	99663330	F	PCDH19	1stExon	1.84846	0.0220715	0	1.82903	0.0228111	0
cg03598919	X	51150887	F	CXorf67	1stExon	-1.66578	0.0292595	0	-1.68176	0.0288259	0
cg03604519	X	70150290	R	SLC7A3	5'UTR	1.80163	0.0272749	0	1.78294	0.0284049	0
cg03605032	X	149533195	R			2.09644	0.011001	0	2.07603	0.0112047	0
cg03605858	X	51150443	F	CXorf67	1stExon	-1.49875	0.0306814	0	-1.46548	0.0316592	0
cg03610137	X	56259040	F	KLF8	5'UTR	2.06742	0.011994	0	2.0518	0.0123383	0
cg03618918	1	160865097	F			-1.56592	0.0259424	0	-1.6032	0.0266634	0
cg03658985	X	153167899	R	AVPR2	TSS200	1.58992	0.0241864	0	1.54316	0.0270657	0
cg03659012	X	77166064	R	ATP7A	TSS200	2.04567	0.0167095	0	2.00137	0.0172397	0
cg03661529	X	77041828	R	ATRX	TSS200	2.09156	0.0136116	0	2.06511	0.0134952	0
cg03662899	X	49768189	R	MIR188	Body	-1.88707	0.021966	0	-1.84757	0.0239313	0
cg03663024	X	101858961	F	ARMCX5	3'UTR	-1.55934	0.0321522	0	-1.43234	0.0328003	0
cg03664928	X	53029937	R			1.74997	0.0270436	0	1.76128	0.027781	0
cg03665601	X	77040152	R	ATRX	Body	1.96378	0.0191677	0	1.96898	0.0192955	0
cg03665912	X	136511413	R			1.51391	0.0344581	0	1.43867	0.0358954	0
cg03670113	X	153640589	F	TAZ	Body	2.1158	0.0090156	0	2.08933	0.00954602	0
cg03671371	X	36975540	R			1.83713	0.021218	0	1.81068	0.0217155	0
cg03672021	X	153602658	F	FLNA	5'UTR	2.11654	0.0124216	0	2.08186	0.013132	0
cg03672915	X	153236845	F	TMEM187	TSS1500	2.0001	0.0190511	0	1.98475	0.0198744	0
cg03675615	X	49593824	F	PAGE4	TSS200	-1.68067	0.0219476	0	-1.65056	0.0225727	0
cg03679005	X	118926017	R	RPL39	TSS1500	1.98817	0.0177696	0	1.98864	0.0169695	0
cg03679269	X	71351803	R	NHSL2	Body	2.06345	0.0140883	0	2.0647	0.0135211	0
cg03683587	X	50557066	F	SHROOM4	TSS200	1.90945	0.0197155	0	1.87207	0.0207738	0
cg03688409	X	55027018	R	APEX2	Body	2.03372	0.0160576	0	2.00558	0.016418	0
cg03691313	X	153603062	F	FLNA	TSS200	2.11362	0.0102403	0	2.09412	0.0103734	0
cg03691818	12	53085038	F	KRT77	Body	1.99111	0.0173798	0	1.94789	0.0182786	0
cg03692134	X	129116990	R	BCORL1	5'UTR	2.10652	0.0102014	0	2.08241	0.00952993	0
cg03692228	X	48776349	F	PIM2	5'UTR	2.08764	0.0147532	0	2.07523	0.0153923	0
cg03693842	X	151620975	R	GABRA3	TSS1500	-1.64093	0.0312397	0	-1.5618	0.0329385	0
cg03697809	X	106750775	F			1.54747	0.0307598	0	1.50835	0.0322769	0
cg03699508	X	79280150	R	TBX22	Body	-1.42206	0.0339054	0	-1.39236	0.0342939	0
cg03704031	X	70712215	R	INGX	Body	1.64906	0.0305686	0	1.55412	0.0335158	0
cg03705894	X	49687068	F	CLCN5	TSS200	2.10077	0.0134208	0	2.06422	0.0133735	0
cg03706022	X	38660704	R	MID1IP1	5'UTR	1.89122	0.019811	0	1.85242	0.0206176	0
cg03711046	X	48814205	R	OTUD5	Body	2.05304	0.0140276	0	2.03018	0.014536	0
cg03716231	X	23684892	R	PRDX4	TSS1500	1.45688	0.0279897	0	1.47469	0.0283275	0
cg03717198	X	20285056	F	RPS6KA3	TSS1500	1.60345	0.029685	0	1.59919	0.0307561	0
cg03717424	X	67651132	F	OPHN1	Body	-1.37394	0.0313959	0	-1.32828	0.0314818	0
cg03717635	X	13586855	R	EGFL6	TSS1500	-1.89672	0.0222518	0	-1.86549	0.0237731	0
cg03718079	X	149716257	F			1.67678	0.0274354	0	1.63592	0.0286717	0
cg03718309	X	153363472	F	MECP2	TSS1500	2.1096	0.0129699	0	2.07675	0.0137461	0
cg03723123	X	55935143	R			1.96532	0.0203366	0	1.93819	0.0210554	0
cg03723195	X	2847354	F	ARSD	1stExon	1.53637	0.0306129	0	1.43002	0.0331062	0
cg03728850	X	55515614	R	USP51	1stExon	2.01011	0.0174378	0	1.99292	0.0173979	0
cg03730082	X	63425725	R	FAM123B	TSS200	2.04602	0.0136702	0	2.02962	0.0133993	0
cg03732411	X	136134475	R			2.00332	0.0177719	0	1.99097	0.0181354	0
cg03733831	X	17653562	R	NHS	1stExon	-2.03495	0.016023	0	-2.01115	0.0169772	0
cg03735049	X	54466618	F	TSR2	TSS1500	1.99251	0.0206881	0	1.95756	0.0214554	0
cg03735077	X	102192803	R	RAB40AL	1stExon	-1.37404	0.0345868	0	-1.39225	0.0356731	0
cg03738247	X	119134526	R			1.97587	0.018206	0	1.95242	0.0181968	0
cg03742148	X	51636629	R	MAGED1	5'UTR	1.94151	0.0211656	0	1.91549	0.0218967	0
cg03746520	X	49166345	F	GAGE10	Body	1.47834	0.0331977	0	1.49021	0.0350107	0
cg03748372	X	49126128	F	PPP1R3F	TSS200	2.05428	0.0120656	0	2.03772	0.0113761	0
cg03748429	X	103500636	R	ESX1	TSS1500	1.77666	0.0275559	0	1.72905	0.0293417	0
cg03749630	X	117484304	F	WDR44	Body	1.46867	0.0288241	0	1.46211	0.0301311	0
cg03751162	X	54466849	R	TSR2	TSS200	2.09273	0.0132885	0	2.06404	0.0136496	0
cg03752015	X	71526944	F	CITED1	TSS1500	1.91712	0.0204612	0	1.86528	0.0225781	0
cg03753451	X	139015490	F			2.11426	0.0114354	0	2.10321	0.0112777	0
cg03753611	X	152990778	F	BCAP31	TSS1500	1.95634	0.0201274	0	1.95438	0.020284	0
cg03754195	X	119694964	R	CUL4B	Body	1.86319	0.0221151	0	1.83818	0.0222851	0
cg03757053	X	30265185	F	MAGEB1	TSS200	-1.87877	0.0222835	0	-1.88198	0.0230297	0
cg03759948	X	48555275	R	SUV39H1	Body	2.04187	0.0143903	0	2.0287	0.0144335	0
cg03761894	X	71527796	R	CITED1	TSS1500	1.84797	0.0233005	0	1.80219	0.0252877	0
cg03765359	X	47479190	R	SYN1	5'UTR	2.08183	0.0134362	0	2.04023	0.013966	0
cg03765898	X	49691109	F	CLCN5	Body	-1.71737	0.0283219	0	-1.6892	0.0288481	0
cg03766586	X	86772789	F	KLHL4	1stExon	1.85702	0.0254174	0	1.85911	0.0250963	0
cg03768687	X	70288358	F	SNX12	TSS200	2.08164	0.0116651	0	2.05291	0.0120644	0
cg03769817	X	99666219	R	PCDH19	TSS1500	2.04964	0.0133031	0	2.00412	0.0141523	0
cg03773146	X	129114634	R			2.10338	0.0108173	0	2.07783	0.0108318	0
cg03787796	X	85302489	R	CHM	1stExon	2.05923	0.0148304	0	2.02963	0.0156183	0
cg03788610	X	102984217	F	GLRA4	TSS1500	-1.79708	0.0233836	0	-1.73618	0.0263065	0
cg03790146	X	69480001	F	P2RY4	TSS1500	-1.44003	0.0319991	0	-1.45346	0.0336275	0
cg03790891	X	106173458	R	CLDN2	3'UTR	-1.75255	0.0226042	0	-1.66237	0.0247021	0
cg03791434	X	128677987	F	OCRL	Body	-1.42365	0.0338913	0	-1.36351	0.0346093	0
cg03793368	X	141293344	R	MAGEC2	TSS1500	-1.49206	0.0332631	0	-1.47012	0.0348219	0
cg03801901	X	42637584	F	PPP1R2P9	TSS200	-1.84722	0.0193421	0	-1.84732	0.0204363	0
cg03802424	X	85403388	R	DACH2	TSS200	1.97795	0.0187676	0	1.9562	0.0196853	0
cg03805048	X	75648083	F	MAGEE1	TSS200	2.09624	0.0149677	0	2.06822	0.0156633	0
cg03806192	X	50212665	F	DGKK	Body	2.06474	0.0138679	0	2.0389	0.0134853	0
cg03810476	X	17392798	R	NHS	TSS1500	1.84925	0.0218953	0	1.82037	0.0233542	0
cg03810479	X	38666254	F			1.34083	0.0284849	0	1.26893	0.0311531	0
cg03811055	X	16888211	F	RBBP7	1stExon	1.50452	0.0350255	0	1.48762	0.036496	0
cg03813951	X	52684130	F	SSX7	TSS200	-1.6978	0.0268543	0	-1.68273	0.0279907	0
cg03814733	X	149106755	F	CXorf40B	TSS200	1.99468	0.0158608	0	1.96471	0.0165126	0
cg03817616	X	63615495	R	MTMR8	TSS200	2.03954	0.0172287	0	2.0226	0.0177719	0
cg03823092	X	99891789	F	TSPAN6	5'UTR	2.03838	0.0202252	0	1.96429	0.0197503	0
cg03823149	X	53468600	F			1.95199	0.019972	0	1.92138	0.0209883	0
cg03825574	X	129116503	R	BCORL1	TSS200	2.07993	0.0111859	0	2.06846	0.0107149	0
cg03826587	X	72068025	F	DMRTC1B	Body	-1.58549	0.0312244	0	-1.55414	0.0325974	0
cg03828160	X	57022102	F	SPIN3	TSS200	2.01268	0.0174537	0	1.95416	0.0181637	0
cg03831206	X	48814955	R	OTUD5	5'UTR	2.05422	0.0156372	0	2.06557	0.015452	0
cg03832506	X	53286187	R	IQSEC2	Body	-1.58065	0.0323447	0	-1.58439	0.0326507	0
cg03834574	X	56259094	R	KLF8	5'UTR	2.11467	0.0126869	0	2.07414	0.0122856	0
cg03840091	X	10111282	R	WWC3	3'UTR	-1.63254	0.0284258	0	-1.59172	0.0301711	0
cg03842291	X	34675964	R	TMEM47	TSS1500	2.05484	0.0139832	0	2.02257	0.0141918	0
cg03845409	X	100183878	R	XKRX	5'UTR	1.89773	0.0233574	0	1.87866	0.0235733	0
cg03851490	X	35937794	R	CXorf22	TSS200	1.74101	0.0265375	0	1.69317	0.0272945	0
cg03858262	X	70473929	R	ZMYM3	5'UTR	2.09225	0.0120193	0	2.07333	0.0117526	0
cg03878985	X	106449739	F	CXorf41	TSS200	2.07089	0.0151618	0	2.02951	0.0152234	0
cg03887211	X	110921097	F			-1.52825	0.0320447	0	-1.50182	0.0324874	0
cg03892808	X	153096307	F	PDZD4	TSS1500	2.1077	0.0108307	0	2.07562	0.0113519	0
cg03894002	X	69664599	R	DLG3	TSS200	2.05802	0.0133772	0	2.03711	0.0140068	0
cg03900860	X	119737944	F	MCTS1	5'UTR	2.08527	0.0113635	0	2.06163	0.0115248	0
cg03905487	X	53123054	F			2.0911	0.0104148	0	2.05044	0.0110956	0
cg03906572	X	152676991	F			2.05584	0.0133987	0	2.04647	0.0131849	0
cg03909472	X	15511733	R	PIR	TSS1500	1.85389	0.0240763	0	1.83846	0.0249349	0
cg03910337	X	117119877	R	KLHL13	5'UTR	-1.44424	0.0354392	0	-1.44159	0.03635	0
cg03911306	3	16648294	F	DAZL	TSS1500	1.86623	0.0207334	0	1.84159	0.0210361	0
cg03915742	X	133306722	R			2.08351	0.0122391	0	2.05867	0.0123152	0
cg03927113	X	119738603	F	MCTS1	Body	2.05107	0.0169862	0	2.01891	0.0175276	0
cg03927302	X	106871544	F	PRPS1	TSS200	1.86971	0.0249303	0	1.83265	0.0256868	0
cg03933846	X	101771857	R	TMSB15A	TSS200	2.04534	0.0151311	0	2.01492	0.015929	0
cg03934360	X	117859585	F			-1.76445	0.0252172	0	-1.69573	0.0277762	0
cg03937594	X	71523280	F	CITED1	5'UTR	-1.72767	0.0290287	0	-1.70635	0.0300058	0
cg03939693	X	67718700	R	YIPF6	TSS200	1.98389	0.0195684	0	1.96519	0.0198712	0
cg03941517	X	134048505	F	MOSPD1	5'UTR	2.00762	0.0156433	0	2.01686	0.015331	0
cg03944921	X	117479980	R	WDR44	TSS200	2.07578	0.0105707	0	2.06126	0.0103284	0
cg03946442	X	20284665	F	RPS6KA3	Body	2.07101	0.0145203	0	2.03628	0.0147825	0
cg03948928	X	150250878	R			1.87013	0.0240986	0	1.85234	0.0248909	0
cg03950785	X	136630705	R			2.00374	0.01882	0	1.96646	0.0192876	0
cg03952112	X	71289513	F	NHSL2	Body	2.02173	0.0151369	0	1.99841	0.0159383	0
cg03956243	12	54059090	F	ATP5G2	3'UTR	-1.45272	0.0319171	0	-1.45441	0.0333122	0
cg03958104	X	41546844	F	GPR34	TSS1500	1.42558	0.0306198	0	1.4767	0.0312349	0
cg03959079	X	30994266	F			-1.79853	0.0203087	0	-1.76433	0.0220618	0
cg03959273	X	135579015	R	HTATSF1	TSS1500	1.9751	0.0165715	0	1.97012	0.0160815	0
cg03960747	X	134853700	R	CT45A1	Body	-1.27678	0.0307428	0	-1.2406	0.0315075	0
cg03968699	X	153236214	F	HCFC1	1stExon	1.86001	0.0253668	0	1.84924	0.0264663	0
cg03971283	X	153141451	F	L1CAM	TSS200	1.98912	0.0201332	0	1.95596	0.0216771	0
cg03971469	X	25031338	F	ARX	Body	1.97506	0.0213581	0	1.95858	0.0212642	0
cg03977822	X	70503563	R	NONO	5'UTR	1.19167	0.0301883	0	1.1907	0.0308291	0
cg03978312	X	103401777	F	MCART6	TSS200	2.021	0.0173716	0	1.97163	0.0172998	0
cg03983969	X	41782695	R	CASK	TSS1500	2.11554	0.0100915	0	2.09492	0.0101994	0
cg03989304	X	117973613	R			2.06075	0.0135184	0	2.0397	0.0138435	0
cg03991766	X	9755100	F	SHROOM2	Body	1.58563	0.0314396	0	1.57018	0.0331574	0
cg03992069	X	70474783	R	ZMYM3	TSS1500	2.11303	0.0116757	0	2.09023	0.0113529	0
cg03993368	X	134479056	F	ZNF75D	TSS1500	2.0909	0.0133552	0	2.0685	0.013608	0
cg03993934	X	101411275	F	BEX5	TSS1500	1.77683	0.0248935	0	1.75762	0.0257101	0
cg03995238	X	47079305	F	CDK16	Body	2.05096	0.0107515	0	2.02297	0.0111689	0
cg03996447	X	19533577	F	MAP3K15	TSS200	2.06968	0.0122808	0	2.04235	0.0122	0
cg04010032	X	129244631	F	ELF4	TSS200	2.09811	0.0120847	0	2.08185	0.0120207	0
cg04012614	X	49020468	R	MAGIX	Body	1.84023	0.0234005	0	1.83135	0.0236081	0
cg04014504	X	37430717	R	LANCL3	TSS200	2.11322	0.0119103	0	2.09372	0.0122124	0
cg04025582	X	100645906	F	RPL36A	TSS200	2.06349	0.0145699	0	2.03651	0.0146611	0
cg04026379	X	47483043	F			2.12136	0.00995961	0	2.09532	0.0100825	0
cg04027004	X	107019426	F	TSC22D3	TSS1500	2.09428	0.0121612	0	2.06036	0.0122477	0
cg04027312	X	46618632	F	SLC9A7	TSS200	2.09748	0.0120569	0	2.08039	0.0120782	0
cg04029282	X	131624049	R	MBNL3	TSS200	1.85396	0.0239466	0	1.92894	0.0215966	0
cg04029366	X	45017072	R	CXorf36	Body	-1.96652	0.0216202	0	-1.9419	0.0224271	0
cg04029630	X	55478329	F	MAGEH1	TSS1500	2.05778	0.0172622	0	2.02925	0.0178404	0
cg04029664	X	117250962	R	KLHL13	TSS200	2.04087	0.0167876	0	2.021	0.0167034	0
cg04031645	X	53713676	F	HUWE1	TSS200	2.00919	0.0191333	0	1.9707	0.0195736	0
cg04032096	X	13954890	R	GPM6B	Body	-2.01826	0.0155185	0	-1.97677	0.0166123	0
cg04039555	X	102000746	R	BHLHB9	TSS200	1.90775	0.0213846	0	1.93279	0.0219055	0
cg04044694	X	100662923	F	HNRNPH2	TSS1500	1.99941	0.0194455	0	1.97927	0.0200222	0
cg04051266	X	34675548	R	TMEM47	TSS200	1.85366	0.0234357	0	1.7888	0.0243356	0
cg04053131	X	11140682	R	HCCS	3'UTR	-1.72318	0.0292471	0	-1.6466	0.0330061	0
cg04059198	X	129115067	F			2.10587	0.0115913	0	2.08622	0.0111285	0
cg04061482	X	117629338	R	DOCK11	TSS1500	2.08069	0.011305	0	2.0518	0.0115535	0
cg04069311	X	131573551	R	MBNL3	5'UTR	-1.47018	0.0340766	0	-1.42579	0.0347901	0
cg04069374	X	119445076	R	FAM70A	Body	2.08523	0.0129705	0	2.05448	0.0135944	0
cg04069419	X	151619939	F	GABRA3	TSS200	1.948	0.0195194	0	1.93285	0.0207639	0
cg04070122	X	154493215	F	RAB39B	Body	2.11426	0.0108341	0	2.09481	0.0108913	0
cg04071644	X	149613662	R	MAMLD1	TSS200	-1.67436	0.0260105	0	-1.65913	0.0254721	0
cg04072009	X	71351668	R	NHSL2	Body	2.04937	0.0150672	0	2.01297	0.0157588	0
cg04075675	X	149861694	R	MTMR1	TSS200	2.10611	0.0121562	0	2.09478	0.0130728	0
cg04077363	X	102531881	F	TCEAL5	TSS200	1.92263	0.0192381	0	1.89481	0.0205624	0
cg04094482	X	73834489	R	RLIM	TSS200	2.09129	0.0131408	0	2.06514	0.0124355	0
cg04101819	X	40006699	R	BCOR	5'UTR	-1.99719	0.0178244	0	-1.98945	0.0175074	0
cg04118889	X	25022750	R	ARX	3'UTR	1.90692	0.0218952	0	1.87945	0.0222869	0
cg04128303	X	122318829	F	GRIA3	Body	1.96007	0.0179163	0	1.91012	0.0182333	0
cg04137897	X	48935660	R	WDR45	Body	-1.97121	0.0179902	0	-1.925	0.0192096	0
cg04141767	X	147800037	R	AFF2	Body	-1.60176	0.022628	0	-1.56654	0.0239334	0
cg04143870	X	132544017	R	GPC4	Body	-1.67257	0.0247361	0	-1.571	0.0264115	0
cg04144603	X	47489551	F	CFP	5'UTR	1.94766	0.0175208	0	1.94307	0.0177099	0
cg04149024	X	153656891	F	ATP6AP1	TSS200	2.10269	0.010746	0	2.07212	0.01171	0
cg04155024	X	15338707	F	PIGA	3'UTR	-1.60425	0.030791	0	-1.58479	0.0313293	0
cg04158739	X	71792943	F	HDAC8	5'UTR	1.98631	0.0204189	0	1.98502	0.0197918	0
cg04166210	X	103087157	R	RAB9B	1stExon	2.0044	0.0158891	0	2.00285	0.0162469	0
cg04167532	X	102631697	F	NGFRAP1	TSS1500	1.82786	0.0265006	0	1.79423	0.0280484	0
cg04177426	X	150863969	R			1.99069	0.0163666	0	1.98656	0.0166314	0
cg04183498	X	20008522	R	LOC729609	TSS1500	2.0959	0.0117217	0	2.07534	0.010919	0
cg04184316	X	118987146	F	UPF3B	TSS200	1.79723	0.0229618	0	1.77158	0.0243578	0
cg04185841	X	102533138	R	TCEAL5	TSS1500	-1.92881	0.0219792	0	-1.87149	0.0234569	0
cg04189697	X	153778656	F	IKBKG	5'UTR	-1.90524	0.0203387	0	-1.89665	0.0205638	0
cg04190002	22	51113604	F	SHANK3	Body	1.50134	0.0288919	0	1.48414	0.0306923	0
cg04190662	X	115085326	F			1.73984	0.022723	0	1.70015	0.023393	0
cg04211807	X	73523953	F	ZCCHC13	TSS200	-1.82765	0.0236025	0	-1.77829	0.0245683	0
cg04216286	X	129039782	R	UTP14A	TSS1500	2.06751	0.0161377	0	2.06104	0.0161195	0
cg04217946	X	31285018	R	DMD	Body	2.02765	0.0155079	0	2.01327	0.0158405	0
cg04223454	X	11284932	F	ARHGAP6	Body	-1.50795	0.0322112	0	-1.44473	0.033547	0
cg04224247	X	9984515	F	WWC3	5'UTR	-1.58842	0.0309465	0	-1.54151	0.0329539	0
cg04225046	X	101906179	R	GPRASP1	TSS200	2.00838	0.0159821	0	2.0044	0.0164837	0
cg04227026	X	150884661	F	FATE1	1stExon	-1.77028	0.0254845	0	-1.72627	0.0273324	0
cg04227631	X	151562205	R	GABRA3	5'UTR	-1.53278	0.024406	0	-1.45832	0.0257375	0
cg04238548	X	106045825	F	TBC1D8B	TSS200	2.06829	0.0141532	0	2.02783	0.0145803	0
cg04238575	X	51486666	F	GSPT2	5'UTR	1.91135	0.0221253	0	1.8634	0.0238739	0
cg04241572	X	53461213	F	HSD17B10	Body	2.09084	0.0125886	0	2.04988	0.0134029	0
cg04262605	X	135333761	F	MAP7D3	TSS200	1.97846	0.0200266	0	1.9262	0.0209885	0
cg04270663	X	56590513	F	UBQLN2	1stExon	2.01626	0.0203968	0	1.93867	0.0208962	0
cg04277998	X	48858688	F	GRIPAP1	TSS200	1.99405	0.0195462	0	1.95571	0.0203585	0
cg04283377	X	47420348	F	ARAF	TSS200	2.06262	0.0158716	0	2.0224	0.0164787	0
cg04287191	X	153210222	F	RENBP	1stExon	1.9747	0.02068	0	1.96728	0.021408	0
cg04287686	X	48644859	R	GATA1	TSS200	-1.52612	0.0256551	0	-1.42996	0.0263202	0
cg04288012	X	53711065	F	HUWE1	5'UTR	2.0351	0.0151119	0	2.01357	0.0150008	0
cg04288265	X	149680306	R	MAMLD1	3'UTR	-1.57934	0.031874	0	-1.58228	0.0324367	0
cg04290452	X	118370187	R	PGRMC1	TSS200	1.75612	0.0260754	0	1.75705	0.0269574	0
cg04292836	X	23761484	F	ACOT9	TSS200	2.07954	0.0124085	0	2.05514	0.0124592	0
cg04294190	X	129629140	R	FAM45B	Body	1.38921	0.0283665	0	1.45764	0.0294082	0
cg04297329	X	72434720	R	NAP1L2	TSS200	2.06506	0.0135251	0	2.04429	0.0138873	0
cg04297907	X	10126668	F	CLCN4	5'UTR	2.02614	0.0146223	0	2.02425	0.0148445	0
cg04298609	X	77041722	R	ATRX	TSS200	2.06969	0.0143995	0	2.06531	0.0144019	0
cg04300278	X	122318890	R	GRIA3	Body	1.90773	0.0188348	0	1.88513	0.0187411	0
cg04302178	X	122993941	R	XIAP	TSS200	2.12217	0.0114456	0	2.09453	0.0115223	0
cg04302192	X	47341740	R	ZNF41	5'UTR	2.07176	0.0131799	0	2.06446	0.0126491	0
cg04302300	X	107179321	R			1.79437	0.020074	0	1.73613	0.0197875	0
cg04303560	X	55249036	F	PAGE5	Body	-1.73883	0.0261362	0	-1.66452	0.0282578	0
cg04308274	X	130207287	F	FLJ30058	5'UTR	1.89214	0.0238725	0	1.85543	0.0252614	0
cg04317640	X	73640431	R	SLC16A2	TSS1500	2.1101	0.0104127	0	2.08355	0.0103517	0
cg04318657	X	3630499	F	PRKX	Body	1.8392	0.0279145	0	1.82916	0.0296447	0
cg04324607	X	9960206	R			-1.53715	0.0339381	0	-1.49636	0.036623	0
cg04327763	X	118925713	F	RPL39	TSS200	2.11834	0.00902909	0	2.10033	0.00858062	0
cg04334684	X	153657362	F	ATP6AP1	Body	2.10085	0.01137	0	2.07492	0.0120988	0
cg04341767	X	49687028	R	CLCN5	TSS200	2.07491	0.0150825	0	2.05884	0.0157521	0
cg04342295	X	119125659	R			1.95054	0.0169881	0	1.89234	0.0176105	0
cg04344997	X	153607129	F	EMD	TSS1500	2.00846	0.0155552	0	1.9676	0.0158355	0
cg04345928	X	38420783	F	TSPAN7	1stExon	2.07779	0.0151978	0	2.05083	0.0156824	0
cg04368919	X	68048131	F	EFNB1	TSS1500	2.01098	0.0190864	0	1.96395	0.0200992	0
cg04369555	X	135578793	R	HTATSF1	TSS1500	2.09905	0.0109673	0	2.07822	0.0112751	0
cg04371001	X	153715321	F	UBL4A	TSS1500	2.11367	0.00911309	0	2.06255	0.0112282	0
cg04376185	X	17755081	R	SCML1	TSS1500	2.00237	0.0151095	0	1.98088	0.0153899	0
cg04381495	X	53455791	F	RIBC1	Body	-1.76253	0.0282575	0	-1.7385	0.0285457	0
cg04387098	X	48380042	F	EBP	TSS200	1.91774	0.0202488	0	1.95224	0.0199168	0
cg04388383	X	64754908	F	LAS1L	TSS1500	2.09229	0.0121405	0	2.07122	0.0121969	0
cg04392209	X	119124215	F			1.92791	0.0229584	0	1.85864	0.0248584	0
cg04392694	X	49019049	F	MAGIX	TSS200	-1.57929	0.0305297	0	-1.59858	0.0307928	0
cg04395332	X	46307369	F	ZNF673	5'UTR	1.85558	0.0238276	0	1.86834	0.024313	0
cg04397441	X	70753023	R	OGT	1stExon	2.05731	0.0154924	0	2.04236	0.0154511	0
cg04399994	X	110339005	R	PAK3	5'UTR	1.76166	0.0287106	0	1.73257	0.0294318	0
cg04402486	X	131352242	R	RAP2C	TSS200	2.1078	0.0113454	0	2.08291	0.0119042	0
cg04402798	X	37003511	R			1.96979	0.0178594	0	1.90211	0.0186749	0
cg04406445	X	43515575	F	MAOA	1stExon	1.88485	0.0196781	0	1.85322	0.0212524	0
cg04412186	X	83757470	R	HDX	TSS200	1.83415	0.0240621	0	1.76669	0.0250816	0
cg04414946	X	9435372	R	TBL1X	5'UTR	-1.95887	0.0182418	0	-1.96428	0.0182036	0
cg04419618	X	135962940	R	RBMX	TSS200	2.10971	0.00948448	0	2.08903	0.00936106	0
cg04424215	X	111325143	R	TRPC5	5'UTR	1.7082	0.0256409	0	1.67789	0.0270632	0
cg04424654	X	109561524	F	AMMECR1	5'UTR	2.0091	0.0170107	0	1.99206	0.0166442	0
cg04428826	X	75649367	F	MAGEE1	1stExon	1.44682	0.0341431	0	1.4053	0.0356135	0
cg04455030	X	129402160	F	ZNF280C	5'UTR	2.00648	0.0199965	0	1.98869	0.0200648	0
cg04455759	11	111956131	R	TIMM8B	Body	-1.66901	0.0293397	0	-1.68759	0.0295545	0
cg04455999	X	119444838	R	FAM70A	Body	2.10843	0.0108337	0	2.08741	0.0105477	0
cg04462931	7	64300061	R			2.12997	0.00790635	0	2.09607	0.00866925	0
cg04464742	X	119694953	R	CUL4B	Body	1.964	0.0195063	0	1.97278	0.0193089	0
cg04474375	X	137793820	R	FGF13	Body	1.86776	0.0209918	0	1.84215	0.0221113	0
cg04476849	X	103173728	F	MIR1256	Body	2.07327	0.0142829	0	2.03799	0.0151166	0
cg04481865	X	139584049	F			1.95921	0.0197563	0	1.95548	0.0192536	0
cg04483797	X	102883838	R	TCEAL1	TSS200	2.08687	0.0157626	0	2.07922	0.0165198	0
cg04484695	X	43742501	F	MAOB	TSS1500	-1.95768	0.0179135	0	-1.88797	0.0195039	0
cg04486022	X	130207446	F	FLJ30058	5'UTR	1.84183	0.0234423	0	1.79719	0.0245159	0
cg04488527	X	21675867	F	KLHL34	1stExon	1.51261	0.0333717	0	1.47929	0.0330125	0
cg04490290	X	45709881	F			1.82583	0.0228011	0	1.83051	0.0231361	0
cg04491396	X	107019182	F	TSC22D3	TSS200	2.12847	0.00971156	0	2.10416	0.00949914	0
cg04493740	X	129474199	F	SLC25A14	5'UTR	2.08347	0.0132295	0	2.05424	0.0133889	0
cg04497165	X	103494417	R			-1.48728	0.0309104	0	-1.43462	0.0319039	0
cg04499381	X	128913671	F	SASH3	TSS1500	2.05025	0.0134882	0	2.03288	0.0136469	0
cg04515986	X	31089692	R	FTHL17	1stExon	-1.55359	0.0311212	0	-1.52412	0.0306998	0
cg04524851	X	57618891	F	ZXDB	1stExon	2.09628	0.0113533	0	2.0785	0.0110014	0
cg04528545	X	36982194	F			1.938	0.0226945	0	1.89403	0.0229378	0
cg04533591	X	118926128	F	RPL39	TSS1500	1.96827	0.021642	0	1.96884	0.0212985	0
cg04544498	X	75647859	R	MAGEE1	TSS1500	1.92068	0.0209642	0	1.8669	0.0208856	0
cg04549977	X	63613026	R	MTMR8	Body	-1.65448	0.0297667	0	-1.65677	0.0304856	0
cg04552106	X	146993425	R	ASFMR1	Body	2.13575	0.00941214	0	2.10738	0.00992177	0
cg04574552	X	14047648	R	GEMIN8	5'UTR	1.79372	0.0290678	0	1.74802	0.0303891	0
cg04574723	X	69479214	F	P2RY4	1stExon	-1.78587	0.0269235	0	-1.73428	0.0283781	0
cg04575501	X	47342663	R	ZNF41	TSS1500	2.13317	0.0120093	0	2.0967	0.0128316	0
cg04581892	X	96138961	F	DIAPH2	Body	-1.75516	0.0300314	0	-1.68571	0.0314551	0
cg04586456	X	46696297	R	RP2	TSS200	2.1507	0.0102464	0	2.12733	0.0100546	0
cg04593531	X	137700748	R	LOC158696	TSS1500	-1.28969	0.0284501	0	-1.19258	0.0305168	0
cg04593869	X	102862630	R	TCEAL3	TSS1500	2.08964	0.011988	0	2.06191	0.012098	0
cg04595393	X	102001018	R	BHLHB9	5'UTR	2.03737	0.0155679	0	2.01856	0.0158423	0
cg04596655	X	128656768	R	SMARCA1	Body	2.13047	0.00939476	0	2.10499	0.00927065	0
cg04598760	X	103083533	R	RAB9B	5'UTR	-1.78045	0.0276553	0	-1.73705	0.0269886	0
cg04599817	X	101410443	F	BEX5	5'UTR	1.96283	0.0198579	0	1.98529	0.019593	0
cg04602218	X	118533786	F	SLC25A43	Body	2.08744	0.0131766	0	2.08784	0.0129565	0
cg04613080	X	150903211	F	CNGA2	TSS200	-1.59129	0.0250762	0	-1.52581	0.0261867	0
cg04614203	X	55114262	F	PAGE2	TSS1500	-1.70107	0.0266126	0	-1.71787	0.0285861	0
cg04624564	X	73325368	F	NCRNA00182	Body	-2.02446	0.0172443	0	-2.01351	0.0174713	0
cg04626171	X	47510405	R	ELK1	TSS1500	2.07923	0.0141842	0	2.04352	0.014536	0
cg04630982	X	139006339	R	MIR505	Body	1.42035	0.0256655	0	1.41355	0.0254148	0
cg04642759	X	144898689	F	SLITRK2	TSS1500	1.93039	0.0222687	0	1.90792	0.0224411	0
cg04646630	X	30233581	F	MAGEB2	TSS200	-1.84611	0.0237812	0	-1.82643	0.024354	0
cg04646860	X	151996001	F	CETN2	3'UTR	-1.54546	0.0346861	0	-1.45937	0.0368162	0
cg04647039	X	31285105	R	DMD	Body	1.65901	0.027248	0	1.61043	0.0295698	0
cg04647094	X	21857776	R	MBTPS2	5'UTR	2.07449	0.0162211	0	2.04759	0.016169	0
cg04650971	X	134555733	R	NCRNA00086	TSS200	2.09433	0.0125045	0	2.07479	0.0125988	0
cg04653083	X	118827004	F	2006-09-01	Body	2.09972	0.0141008	0	2.08842	0.0144789	0
cg04663649	X	131157704	R	MST4	Body	1.99234	0.0186415	0	1.96615	0.0195114	0
cg04665139	X	15353772	F	PIGA	TSS200	2.08888	0.0133088	0	2.07103	0.013305	0
cg04675170	X	64754950	R	LAS1L	TSS1500	2.13466	0.0114806	0	2.09843	0.0118978	0
cg04675306	X	135067450	R	SLC9A6	TSS200	2.10577	0.0120009	0	2.05896	0.0129812	0
cg04675919	X	49042889	F	PRICKLE3	TSS200	2.09569	0.0107119	0	2.07444	0.0111202	0
cg04681171	X	24712459	R	POLA1	Body	1.97377	0.0178097	0	1.94936	0.0177673	0
cg04685060	X	30265350	R	MAGEB1	5'UTR	-1.60881	0.0307668	0	-1.57211	0.0329368	0
cg04690567	X	53964887	R	PHF8	3'UTR	-1.90126	0.0210679	0	-1.88341	0.0220572	0
cg04691867	X	124339261	F			2.03404	0.0146391	0	1.97325	0.015564	0
cg04700060	X	129402929	R	ZNF280C	TSS200	2.08207	0.0133187	0	2.07327	0.0132302	0
cg04702045	X	67653598	R	OPHN1	TSS1500	2.04695	0.0153047	0	2.04228	0.0151376	0
cg04703500	X	48858679	F	GRIPAP1	TSS200	2.0511	0.0136914	0	2.02238	0.0144834	0
cg04704683	X	84634308	R	POF1B	Body	-1.6003	0.0268264	0	-1.49463	0.0283327	0
cg04709809	X	47930636	F	ZNF630	TSS200	2.04961	0.0153491	0	2.02355	0.0152781	0
cg04712194	X	153639778	R	TAZ	TSS200	2.11995	0.0101373	0	2.09385	0.0101191	0
cg04716051	X	18443256	R	CDKL5	TSS1500	2.10704	0.0111244	0	2.08043	0.0113552	0
cg04721883	X	103499577	R	ESX1	5'UTR	1.90899	0.0196877	0	1.91223	0.0196358	0
cg04730443	X	26210529	R	MAGEB6	TSS200	-1.45224	0.0334434	0	-1.35531	0.0341759	0
cg04734394	X	48911060	R			2.1001	0.00912779	0	2.09225	0.00868982	0
cg04739874	X	131157495	F	MST4	5'UTR	2.1025	0.0120468	0	2.07252	0.0125602	0
cg04740028	X	47383436	F			2.12736	0.0104297	0	2.10347	0.0106094	0
cg04743474	X	131624555	F	MBNL3	TSS1500	1.9185	0.0223753	0	1.8732	0.0224124	0
cg04744025	X	146993175	F	ASFMR1	Body	2.04751	0.0146741	0	2.01131	0.0148034	0
cg04745408	X	107068901	R	MID2	TSS200	1.83894	0.0239388	0	1.81775	0.0242853	0
cg04746792	X	84258939	F	APOOL	Body	2.02467	0.017565	0	2.00302	0.0178678	0
cg04747879	X	70288391	F	SNX12	TSS200	2.12612	0.00982004	0	2.09547	0.00975928	0
cg04748497	X	101906989	R	GPRASP1	5'UTR	2.01849	0.0176178	0	2.02244	0.0176135	0
cg04751297	X	39960365	F	BCOR	5'UTR	-1.99841	0.0187017	0	-1.9782	0.0196988	0
cg04752574	X	75005102	R	MAGEE2	TSS200	1.78382	0.0279815	0	1.69652	0.0298974	0
cg04754076	X	152599461	F	ZNF275	TSS200	2.10363	0.0157289	0	2.08424	0.0148898	0
cg04755662	X	66763359	F	AR	TSS1500	-1.80877	0.0255118	0	-1.84675	0.0252829	0
cg04763286	X	128812388	F			2.07018	0.0122995	0	2.06421	0.0119564	0
cg04764476	X	153236825	F	TMEM187	TSS1500	1.751	0.0268821	0	1.6994	0.0284133	0
cg04768312	X	70337980	F	MED12	TSS1500	1.95721	0.0234324	0	1.86993	0.0251805	0
cg04769268	X	48755762	F	PQBP1	5'UTR	2.12326	0.00951644	0	2.09971	0.00995413	0
cg04771154	X	48755502	R	PQBP1	TSS1500	1.98159	0.0187006	0	1.97509	0.0187625	0
cg04771729	X	130929851	F	LOC286467	Body	-2.03468	0.0139267	0	-2.00488	0.0140154	0
cg04772362	X	152161306	F	PNMA5	TSS1500	-1.48511	0.0339227	0	-1.40829	0.0355395	0
cg04777103	X	119738402	F	MCTS1	TSS200	1.97166	0.0213259	0	1.95199	0.0220507	0
cg04779297	X	16964882	R	REPS2	5'UTR	1.73662	0.0299634	0	1.74552	0.0305281	0
cg04782269	X	74493844	R	UPRT	TSS200	1.9471	0.0197977	0	1.91574	0.0204192	0
cg04784122	X	154033688	R	MPP1	5'UTR	2.03046	0.014334	0	2.00297	0.0147263	0
cg04787237	X	153060546	F	IDH3G	TSS1500	2.09556	0.0106808	0	2.08004	0.0107319	0
cg04790148	X	35937765	R	CXorf22	TSS200	1.75651	0.022827	0	1.74771	0.022471	0
cg04791287	X	23351264	F			1.94642	0.0195657	0	1.93828	0.0196789	0
cg04791822	X	47441573	R	SYN1	Body	1.89125	0.0225055	0	1.87419	0.0212215	0
cg04793532	X	107683309	R	COL4A5	5'UTR	1.9644	0.0216298	0	1.91031	0.0226411	0
cg04811556	X	133683331	R			2.11759	0.0133472	0	2.08817	0.0138328	0
cg04812249	X	106171680	F	CLDN2	Body	-1.67709	0.0298741	0	-1.70677	0.030653	0
cg04813240	X	39471929	R			-1.41015	0.036112	0	-1.42257	0.0378291	0
cg04814085	X	70475318	R	ZMYM3	TSS1500	1.92971	0.0190415	0	1.91778	0.0199678	0
cg04817724	X	103809991	F	IL1RAPL2	TSS1500	1.72436	0.026846	0	1.67805	0.0273891	0
cg04820593	X	54383906	F	WNK3	5'UTR	1.44624	0.0331355	0	1.40902	0.0347342	0
cg04821091	X	129473898	R	SLC25A14	TSS200	2.08927	0.0138084	0	2.07165	0.0133532	0
cg04828704	X	107070200	F	MID2	Body	2.01272	0.0146728	0	2.00185	0.0143269	0
cg04836978	X	72783164	R	LOC139201	TSS1500	2.10008	0.0108182	0	2.06417	0.0109572	0
cg04854285	X	102531822	R	TCEAL5	TSS200	1.91453	0.0197757	0	1.89523	0.0202479	0
cg04855977	X	128977653	F	ZDHHC9	TSS200	2.08588	0.0126862	0	2.0592	0.0123923	0
cg04856605	X	69353178	R	IGBP1	TSS200	1.94744	0.0184984	0	1.9406	0.0187207	0
cg04858776	11	59318494	R			1.74797	0.0250801	0	1.78246	0.0263368	0
cg04867253	X	70472827	F	ZMYM3	Body	1.60441	0.0305625	0	1.6028	0.031684	0
cg04872051	X	46433447	R	CHST7	1stExon	2.1089	0.0108627	0	2.08816	0.0104785	0
cg04882894	X	130423289	R	IGSF1	5'UTR	1.98105	0.0175026	0	1.95837	0.0178859	0
cg04886514	X	66764893	F	AR	1stExon	2.05763	0.0153193	0	2.00223	0.0166173	0
cg04889508	X	133931380	F	FAM122B	TSS200	2.06006	0.0180658	0	2.01954	0.018237	0
cg04907664	X	68049805	R	EFNB1	Body	2.08342	0.0128747	0	2.06133	0.0133046	0
cg04918728	X	18845875	F	PPEF1	3'UTR	-1.74644	0.0251778	0	-1.70473	0.024841	0
cg04919858	X	41135246	F			1.8697	0.0232522	0	1.86333	0.0241901	0
cg04922020	X	134166009	F	FAM127A	TSS1500	2.00822	0.0183293	0	2.00979	0.018252	0
cg04924141	X	154493858	F	RAB39B	TSS200	1.95013	0.0194463	0	1.91186	0.0211465	0
cg04924696	X	23925746	R	CXorf58	TSS1500	2.04918	0.0140192	0	2.03217	0.0145015	0
cg04924736	X	101410888	F	BEX5	TSS200	2.05006	0.0153803	0	2.01747	0.0159381	0
cg04926827	X	109246494	F	TMEM164	5'UTR	1.97915	0.01721	0	1.95922	0.0184527	0
cg04929015	X	17818629	F	RAI2	Body	-1.42489	0.0285934	0	-1.27265	0.0314811	0
cg04929022	X	135617792	R	VGLL1	5'UTR	-1.85571	0.0234515	0	-1.82898	0.0235237	0
cg04929599	X	151142862	R	GABRE	Body	2.0063	0.0172312	0	1.96069	0.0185984	0
cg04929865	X	152760078	F	BGN	TSS1500	-1.37971	0.0308656	0	-1.29088	0.0316154	0
cg04930858	X	48777487	F	PIM2	TSS1500	1.14105	0.027721	0	1.11274	0.027895	0
cg04932149	X	53449558	R	SMC1A	1stExon	1.57886	0.0336232	0	1.49212	0.0353489	0
cg04932755	X	68047893	R	EFNB1	TSS1500	1.90984	0.0215194	0	1.88186	0.0218357	0
cg04944936	X	54209594	F	FAM120C	1stExon	2.07462	0.0120804	0	2.06653	0.0121789	0
cg04946709	16	59789030	R	LOC644649	Body	-1.95353	0.0173776	0	-1.93486	0.0176944	0
cg04950711	X	151306718	F	MAGEA10	5'UTR	-1.5634	0.032075	0	-1.54708	0.0332399	0
cg04960964	X	152677383	R			2.08464	0.0120716	0	2.04998	0.0121041	0
cg04967538	X	119379188	R	CXorf42	TSS200	2.07723	0.0157678	0	2.04651	0.0157831	0
cg04981952	11	76061438	R	PRKRIR	3'UTR	-1.6444	0.0267767	0	-1.66477	0.0282817	0
cg04992335	X	40017469	R	BCOR	5'UTR	1.51307	0.0317191	0	1.49826	0.0325675	0
cg04995154	X	149529976	R			1.98817	0.0190921	0	1.95609	0.0193847	0
cg05016192	X	124337026	F			2.03304	0.0164909	0	1.97588	0.0176058	0
cg05019001	X	66766334	R	AR	1stExon	1.90165	0.0216583	0	1.87781	0.02022	0
cg05026884	X	40032180	F	BCOR	5'UTR	1.57566	0.0306346	0	1.48575	0.033062	0
cg05028071	X	48900948	R	TFE3	1stExon	1.99807	0.0190836	0	1.99009	0.0195937	0
cg05028588	X	24332162	R	FAM48B2	TSS1500	-1.46699	0.0352569	0	-1.45856	0.0362433	0
cg05029625	X	64627755	R			2.00275	0.0173565	0	1.94843	0.016837	0
cg05032098	X	102840912	R	TCEAL4	5'UTR	1.85606	0.0228054	0	1.73488	0.0259495	0
cg05032353	X	128674224	R	OCRL	TSS200	1.92814	0.0210788	0	1.88134	0.022739	0
cg05032903	X	99665948	F	PCDH19	TSS1500	2.03311	0.0157444	0	1.9996	0.0165874	0
cg05034175	X	134233109	F	NCRNA00087	TSS1500	2.10932	0.0104709	0	2.08317	0.0104062	0
cg05045028	X	129299924	R	AIFM1	TSS200	2.06899	0.0134529	0	2.06693	0.0134371	0
cg05045659	X	67352784	R	OPHN1	Body	-1.67155	0.0281858	0	-1.55717	0.0301361	0
cg05045738	X	73834707	F	RLIM	TSS1500	2.00145	0.0177349	0	1.97319	0.016219	0
cg05047411	X	149009895	R	MAGEA8	TSS200	-1.81571	0.0228025	0	-1.75341	0.025271	0
cg05047811	X	152875939	R			2.05587	0.0151638	0	2.05034	0.0141722	0
cg05049545	X	18372696	F	SCML2	5'UTR	2.08941	0.0147388	0	2.06854	0.0145203	0
cg05049933	X	103357458	F	MCART6	5'UTR	2.06145	0.0132643	0	2.03192	0.0138392	0
cg05052243	X	134975547	F	SAGE1	TSS1500	-1.60912	0.0319399	0	-1.57291	0.0336767	0
cg05052271	X	114794530	R	PLS3	TSS1500	-1.50492	0.0340516	0	-1.4784	0.0351922	0
cg05059648	X	103356954	R	MCART6	5'UTR	2.07261	0.0108625	0	2.04046	0.0109479	0
cg05059994	X	15755989	F	CA5B	TSS1500	1.36366	0.0338907	0	1.40273	0.0352128	0
cg05064925	X	107681469	R	COL4A6	1stExon	1.99636	0.0169935	0	1.96029	0.017123	0
cg05065576	X	103087808	R	RAB9B	TSS1500	-1.54353	0.0348396	0	-1.48059	0.0368039	0
cg05073171	X	134232157	F	NCRNA00087	Body	2.07995	0.0127615	0	2.07317	0.012301	0
cg05074623	X	151999750	F	NSDHL	5'UTR	2.09728	0.0110754	0	2.07757	0.011433	0
cg05078558	X	140269750	F			-1.72534	0.0278991	0	-1.68171	0.0294219	0
cg05078775	X	34674683	R	TMEM47	Body	1.98285	0.0207501	0	1.92536	0.0224976	0
cg05083020	X	48694089	F	PCSK1N	TSS200	2.05239	0.0160645	0	2.00148	0.0170059	0
cg05085049	X	152909992	F	DUSP9	5'UTR	2.04626	0.0140063	0	2.00346	0.0147505	0
cg05086798	X	23350313	R			2.05006	0.0142284	0	2.04022	0.0134529	0
cg05088151	X	152677200	R			2.12697	0.0124472	0	2.08425	0.0125246	0
cg05091873	X	150067687	F	CD99L2	TSS1500	2.12669	0.00919842	0	2.11454	0.00861698	0
cg05093881	X	128928771	R	SASH3	3'UTR	-1.75364	0.0275485	0	-1.76957	0.0284163	0
cg05096434	X	106243404	F	MORC4	1stExon	2.08233	0.0120401	0	2.04427	0.0129814	0
cg05096515	X	106362254	R	RBM41	TSS200	1.78311	0.0270439	0	1.77005	0.0279821	0
cg05096731	X	9754594	R	SHROOM2	1stExon	1.89426	0.022103	0	1.85631	0.0229907	0
cg05100261	X	153626754	R	RPL10	Body	2.11298	0.0123244	0	2.08463	0.0124875	0
cg05100268	X	153640967	R	DNASE1L1	TSS1500	2.07229	0.013905	0	2.06488	0.0136318	0
cg05100479	X	113819290	F	HTR2C	5'UTR	1.30412	0.0314174	0	1.2827	0.0318007	0
cg05100634	18	45457604	R	SMAD2	TSS200	1.71986	0.0287962	0	1.69051	0.0299861	0
cg05103731	X	153237764	R	TMEM187	TSS1500	2.06076	0.0130597	0	2.03152	0.0133076	0
cg05104476	X	49092076	F	CCDC22	5'UTR	1.87547	0.0235585	0	1.83396	0.0244053	0
cg05106824	X	120181294	R	GLUD2	TSS200	1.67967	0.0298186	0	1.66649	0.0315154	0
cg05109065	X	72783402	R	LOC139201	TSS1500	1.95023	0.0207365	0	1.91913	0.0213676	0
cg05109619	X	69509801	R	PDZD11	TSS200	2.10577	0.00965386	0	2.09733	0.00858589	0
cg05114100	X	114524286	R	LUZP4	TSS200	-1.77418	0.0243559	0	-1.72075	0.0263876	0
cg05116966	X	105969622	R	RNF128	TSS1500	2.03872	0.0148781	0	1.99117	0.0152895	0
cg05123368	X	37026697	R	FAM47C	1stExon	-1.58022	0.0319587	0	-1.59736	0.0321476	0
cg05127178	X	51636111	F	MAGED1	TSS1500	1.90764	0.0210925	0	1.89529	0.0215166	0
cg05130312	X	130930098	R	LOC286467	Body	-2.03947	0.0153201	0	-2.03353	0.0154371	0
cg05134041	X	82763219	R	POU3F4	TSS200	1.72148	0.0224858	0	1.65676	0.0227629	0
cg05135828	X	142721385	F	SLITRK4	5'UTR	1.97692	0.0185056	0	1.93093	0.0190103	0
cg05137263	X	30327625	R	NR0B1	TSS200	1.96741	0.0190179	0	1.93726	0.0197142	0
cg05140257	X	103401646	F	MCART6	1stExon	1.93705	0.022151	0	1.90016	0.0235393	0
cg05143403	X	55744049	F	RRAGB	TSS200	2.11264	0.0107008	0	2.07207	0.0114396	0
cg05147108	X	128674369	R	OCRL	5'UTR	2.06845	0.0156889	0	2.03143	0.0164682	0
cg05152459	X	75005087	R	MAGEE2	TSS200	1.76923	0.0273281	0	1.69509	0.0275566	0
cg05152874	X	50557122	F	SHROOM4	TSS200	1.98541	0.017348	0	1.98152	0.0174469	0
cg05153913	X	47050152	F	UBA1	TSS200	1.86541	0.0257264	0	1.83286	0.0275347	0
cg05162528	X	153240299	R	TMEM187	5'UTR	1.59265	0.0213625	0	1.64222	0.0223586	0
cg05168419	X	38114129	F			-1.64133	0.0283265	0	-1.56648	0.0303097	0
cg05172693	X	119379153	F	CXorf42	TSS200	1.89614	0.0213546	0	1.87653	0.0210933	0
cg05177544	X	106245868	R			-1.81236	0.0246041	0	-1.79628	0.0241059	0
cg05181702	X	9983462	R	WWC3	TSS1500	2.04691	0.0147974	0	2.01117	0.0147749	0
cg05184076	X	102941799	F	MORF4L2	TSS200	1.99102	0.0198867	0	1.94707	0.0202955	0
cg05184682	X	21857796	R	MBTPS2	5'UTR	2.06858	0.0140468	0	2.03078	0.0138601	0
cg05185504	X	119443687	F	FAM70A	Body	2.0755	0.0151952	0	2.07838	0.0153084	0
cg05185776	X	55187570	F	FAM104B	Body	2.03509	0.0169315	0	2.0285	0.0171465	0
cg05190516	X	99891595	F	TSPAN6	Body	1.52822	0.0353927	0	1.4834	0.0350229	0
cg05192472	X	106449657	R	NUP62CL	5'UTR	2.11948	0.0123287	0	2.08566	0.0120577	0
cg05193067	X	102602623	R			-1.70714	0.0192948	0	-1.65567	0.0198656	0
cg05196026	X	137793096	R	FGF13	Body	1.91736	0.0198184	0	1.89257	0.0198345	0
cg05200254	X	119737969	F	MCTS1	5'UTR	2.06405	0.0148939	0	2.05246	0.0149088	0
cg05204037	X	84258754	R	APOOL	TSS200	2.09118	0.011935	0	2.06068	0.0117357	0
cg05206294	X	118708375	F	UBE2A	TSS200	2.04181	0.0159362	0	1.99413	0.0160794	0
cg05212419	X	63425250	F	FAM123B	5'UTR	2.02869	0.0156396	0	2.01344	0.0162124	0
cg05219621	X	15683403	R	TMEM27	TSS1500	-1.6626	0.0291898	0	-1.64389	0.0291324	0
cg05222959	X	153665103	R	GDI1	TSS200	2.00427	0.0146949	0	2.0069	0.0149824	0
cg05223249	X	55020520	R	PFKFB1	TSS200	-1.8591	0.0224548	0	-1.83779	0.0234921	0
cg05223760	X	49126243	F	PPP1R3F	TSS200	2.07595	0.0138427	0	2.07186	0.0132745	0
cg05226646	X	39948256	F	BCOR	5'UTR	-1.37342	0.0292683	0	-1.36692	0.0297966	0
cg05237609	X	46404607	R	ZNF674	5'UTR	2.10014	0.0111388	0	2.08423	0.0109737	0
cg05237970	X	134124948	R	LOC644538	TSS200	1.9884	0.0184851	0	1.95037	0.0198595	0
cg05239680	X	63005366	F			2.04245	0.0124808	0	2.02139	0.0135273	0
cg05240083	X	117629034	F	DOCK11	TSS1500	1.81353	0.0220597	0	1.79464	0.0224053	0
cg05240537	X	103346747	R	MIR1256	TSS1500	-2.01588	0.0186792	0	-1.99653	0.0189453	0
cg05242815	X	25023562	F	ARX	Body	2.02081	0.0158146	0	1.95346	0.017256	0
cg05245722	X	92929190	F	FAM133A	1stExon	1.77237	0.0271603	0	1.71946	0.0283751	0
cg05254049	X	47479662	F	SYN1	TSS1500	1.64136	0.0285538	0	1.63792	0.0285508	0
cg05257947	X	11776394	F	MSL3	1stExon	2.09675	0.0104858	0	2.06726	0.0104078	0
cg05259868	X	150344204	R	GPR50	TSS1500	1.8552	0.0208808	0	1.79084	0.0228439	0
cg05260852	X	54665817	F			2.07412	0.0114347	0	2.05374	0.0114602	0
cg05264033	X	75006266	F	MAGEE2	TSS1500	-1.9822	0.0184379	0	-1.92517	0.0194001	0
cg05272837	X	54071268	R	PHF8	TSS1500	2.07948	0.0132938	0	2.05428	0.0138792	0
cg05275343	X	15353925	F	PIGA	TSS1500	2.07162	0.0126274	0	2.02578	0.013345	0
cg05279113	X	71459115	F	ERCC6L	TSS1500	2.10576	0.0125397	0	2.09278	0.011771	0
cg05288642	X	134138149	F			1.93131	0.0198312	0	1.89577	0.0202084	0
cg05288927	X	146993092	F	ASFMR1	Body	2.02432	0.017049	0	2.01579	0.0170113	0
cg05290899	X	48769310	F	SLC35A2	TSS200	1.91729	0.0214452	0	1.90178	0.0214249	0
cg05292991	X	47077403	R	CDK16	TSS1500	1.8297	0.0272612	0	1.78354	0.0285603	0
cg05294909	X	17756060	F	SCML1	5'UTR	2.07001	0.0132636	0	2.04944	0.0141043	0
cg05295417	X	148623231	R	CXorf40A	5'UTR	2.04709	0.0156138	0	2.02793	0.0155146	0
cg05302110	X	50214570	F	DGKK	TSS1500	1.95893	0.0206608	0	1.89649	0.0222788	0
cg05302212	X	46433015	R	CHST7	TSS200	2.07743	0.0139987	0	2.07617	0.013912	0
cg05305760	X	70712563	F	INGX	Body	1.77844	0.0288323	0	1.71372	0.0300861	0
cg05308904	14	106657833	F			1.43136	0.0321355	0	1.36164	0.0338777	0
cg05313317	X	43833081	F	NDP	TSS200	1.40231	0.0289518	0	1.36125	0.0288217	0
cg05313921	X	84189658	R	UBE2DNL	Body	-1.67645	0.0296371	0	-1.65806	0.0314133	0
cg05322190	X	142719333	R	SLITRK4	5'UTR	-1.44762	0.0310432	0	-1.37216	0.0319995	0
cg05327750	X	106361572	R	RBM41	Body	2.05784	0.0151156	0	2.06179	0.0156306	0
cg05335577	X	70331493	F	IL2RG	TSS200	2.06836	0.0151112	0	2.03665	0.0155265	0
cg05345404	X	53468666	R			2.03792	0.0162601	0	2.05267	0.0160721	0
cg05347431	X	132547568	R	GPC4	Body	1.91177	0.0227007	0	1.87224	0.0243846	0
cg05361475	X	74744538	F	ZDHHC15	TSS1500	-1.56129	0.0334097	0	-1.48997	0.0347287	0
cg05363666	X	106872025	R	PRPS1	Body	2.03939	0.0167319	0	2.02006	0.017183	0
cg05365121	X	152599997	R	ZNF275	5'UTR	1.99673	0.0186163	0	1.97165	0.0187912	0
cg05370638	X	37706736	R	DYNLT3	1stExon	2.09872	0.0116223	0	2.08091	0.0114899	0
cg05371395	X	12156894	R	FRMPD4	5'UTR	1.84237	0.0246573	0	1.81226	0.0254588	0
cg05373692	X	74743375	F	ZDHHC15	TSS200	1.69554	0.0296244	0	1.71404	0.0299714	0
cg05374090	X	152864599	R	FAM58A	5'UTR	2.0857	0.0122945	0	2.07435	0.0121273	0
cg05375065	X	62780844	F	LOC92249	Body	2.0365	0.0156433	0	1.98914	0.0163905	0
cg05377165	14	89628422	F	FOXN3	3'UTR	-1.50976	0.0343277	0	-1.42928	0.0367879	0
cg05379196	X	150151580	R	HMGB3	TSS200	2.08632	0.0130133	0	2.05631	0.0131516	0
cg05385973	X	37430777	F	LANCL3	TSS200	2.05842	0.0144924	0	2.02473	0.0151183	0
cg05392989	X	48748398	R			2.06031	0.0155662	0	2.06421	0.0156163	0
cg05397738	X	118369571	F	PGRMC1	TSS1500	-1.8508	0.0245338	0	-1.81638	0.026164	0
cg05397816	X	117957786	R	ZCCHC12	1stExon	2.11313	0.0102132	0	2.09301	0.00914977	0
cg05407106	X	52897409	F	XAGE3	TSS1500	-1.50688	0.0294643	0	-1.53499	0.0303553	0
cg05414241	X	51240059	F	NUDT11	TSS1500	2.06533	0.0125273	0	2.06425	0.0123505	0
cg05414556	X	128913922	F	SASH3	1stExon	2.13013	0.00995314	0	2.09755	0.010341	0
cg05418443	X	118370461	R	PGRMC1	1stExon	2.09035	0.0106736	0	2.07175	0.0106951	0
cg05418506	X	47004107	R	NDUFB11	Body	2.1152	0.0106554	0	2.08925	0.0103673	0
cg05418779	X	138771271	R	MCF2	5'UTR	-1.95872	0.0185942	0	-1.90666	0.0209007	0
cg05419227	X	70752860	R	OGT	TSS200	2.04696	0.0172677	0	2.03449	0.0168772	0
cg05422360	X	75648455	F	MAGEE1	1stExon	1.95172	0.0189927	0	1.94362	0.0190838	0
cg05423956	X	154030224	F	MPP1	5'UTR	1.66475	0.0299945	0	1.65939	0.0294356	0
cg05424366	X	100663101	F	HNRNPH2	TSS200	1.90669	0.0252769	0	1.89864	0.0259175	0
cg05424879	X	153719176	F	SLC10A3	TSS200	2.06669	0.0115646	0	2.04775	0.0113792	0
cg05425577	X	54522221	R	FGD1	1stExon	2.11172	0.0131899	0	2.08822	0.0132616	0
cg05427163	X	48397938	F	TBC1D25	TSS200	2.11174	0.0116088	0	2.08801	0.0115328	0
cg05434903	X	117251118	F	KLHL13	TSS1500	2.07744	0.012953	0	2.06283	0.0137811	0
cg05435697	X	153067618	F			1.42899	0.0370435	0	1.45012	0.0373629	0
cg05437059	X	108868775	R	KCNE1L	TSS1500	-2.02771	0.0162754	0	-2.0107	0.0172253	0
cg05438092	X	153603066	F	FLNA	TSS200	2.11724	0.0106399	0	2.0956	0.0104139	0
cg05439258	X	49220271	F	GAGE2A	Body	-1.68782	0.0272232	0	-1.64798	0.0295231	0
cg05441864	X	108976893	F	ACSL4	TSS1500	2.1152	0.0128768	0	2.09698	0.0129577	0
cg05442715	X	23926141	R	CXorf58	5'UTR	2.03996	0.0129663	0	2.04604	0.0128602	0
cg05443523	X	43515213	F	MAOA	TSS200	1.71431	0.0264836	0	1.70795	0.0263965	0
cg05444994	X	21392324	F	CNKSR2	TSS1500	1.98836	0.017671	0	1.96057	0.0180365	0
cg05445331	X	133119028	F	GPC3	Body	2.05239	0.0172337	0	1.99938	0.0177457	0
cg05449830	X	71527091	R	CITED1	TSS1500	1.91353	0.0231793	0	1.88191	0.0251314	0
cg05450314	X	101968430	R	GPRASP2	5'UTR	1.70847	0.0236593	0	1.66294	0.0233767	0
cg05452887	X	119005413	F	NDUFA1	TSS1500	2.09012	0.0132469	0	2.07977	0.0132018	0
cg05453458	X	100878340	R	ARMCX3	TSS200	2.03886	0.0163227	0	2.01076	0.0166262	0
cg05454424	X	42637578	F	PPP1R2P9	TSS200	-2.06882	0.014103	0	-2.05799	0.0141117	0
cg05456652	X	34960884	F	FAM47B	TSS200	-1.97557	0.0186764	0	-1.98006	0.019399	0
cg05461361	X	154299395	F	MTCP1	1stExon	2.1134	0.0110585	0	2.08085	0.0118625	0
cg05462236	X	63615456	F	MTMR8	TSS200	2.06711	0.0141346	0	2.05416	0.0142961	0
cg05463813	X	153051005	F	SRPK3	3'UTR	-1.39837	0.0356981	0	-1.46688	0.0372564	0
cg05463948	X	50652429	R	BMP15	TSS1500	-1.52735	0.0312453	0	-1.42979	0.0329833	0
cg05464374	X	71525859	F	CITED1	5'UTR	1.9297	0.0210335	0	1.89548	0.0230231	0
cg05467600	X	103499724	F	ESX1	TSS200	1.99258	0.0158854	0	1.97627	0.015985	0
cg05470074	X	101411227	R	BEX5	TSS1500	1.7935	0.0278936	0	1.82741	0.0285937	0
cg05471258	X	107514114	F	COL4A6	Body	1.83139	0.0279302	0	1.8096	0.0291533	0
cg05474077	X	80457709	R	HMGN5	TSS1500	2.04916	0.0174414	0	2.0246	0.0181117	0
cg05475280	X	150569790	F	VMA21	Body	1.4344	0.02998	0	1.44881	0.0305063	0
cg05476089	X	151999289	R	CETN2	5'UTR	2.12486	0.00927501	0	2.09546	0.00927026	0
cg05476522	X	54521732	R	FGD1	1stExon	1.99018	0.0155033	0	1.97156	0.015156	0
cg05478253	X	117252422	F	KLHL13	TSS1500	-1.61408	0.0252199	0	-1.57883	0.0253044	0
cg05491276	X	68836772	R	EDA	3'UTR	2.09435	0.0127114	0	2.07044	0.0134404	0
cg05494459	X	48334337	F	FTSJ1	TSS1500	2.05094	0.0150431	0	2.04733	0.0152402	0
cg05511138	X	11682622	R	ARHGAP6	1stExon	2.01239	0.0168453	0	1.98714	0.0177027	0
cg05511752	X	70338656	F	MED12	1stExon	2.10615	0.01202	0	2.08414	0.0118472	0
cg05512407	X	84350393	F	SATL1	Body	-1.82733	0.025322	0	-1.78706	0.0263565	0
cg05515118	X	102565934	F	BEX2	1stExon	2.067	0.015424	0	2.04278	0.0156287	0
cg05516935	X	55744028	R	RRAGB	TSS200	1.94075	0.0234418	0	1.92544	0.023566	0
cg05526804	X	47342124	F	ZNF41	5'UTR	2.05763	0.0145639	0	2.0504	0.0152212	0
cg05532403	X	15756920	F	CA5B	5'UTR	1.87689	0.0238236	0	1.86799	0.0248155	0
cg05532720	X	100880276	F	ARMCX3	Body	-1.66002	0.0316661	0	-1.63182	0.0328351	0
cg05533223	X	73071194	F	XIST	Body	-2.00049	0.0170512	0	-1.976	0.0185001	0
cg05534333	X	153707029	F	LAGE3	Body	2.07879	0.0139729	0	2.06125	0.0142159	0
cg05547600	X	134847106	R	CT45A1	TSS200	-1.57755	0.0315065	0	-1.58397	0.0332217	0
cg05548952	X	129068271	F			-1.76942	0.0283765	0	-1.75343	0.0293585	0
cg05551025	X	110924355	F	ALG13	TSS1500	1.97833	0.0214133	0	1.91994	0.0227918	0
cg05554396	X	102510120	R	TCEAL8	1stExon	2.13002	0.0103632	0	2.11386	0.00965078	0
cg05555050	X	103809805	R	IL1RAPL2	TSS1500	1.84339	0.0251401	0	1.81812	0.0255769	0
cg05558522	X	70288033	F	SNX12	1stExon	2.11093	0.0115643	0	2.08759	0.0120479	0
cg05559023	X	39952171	F	BCOR	5'UTR	-2.03679	0.0160815	0	-1.98796	0.0173574	0
cg05559795	X	56258812	F	KLF8	TSS200	2.05132	0.0165724	0	2.00056	0.0179401	0
cg05559881	X	136651644	R	ZIC3	Body	1.62207	0.0296018	0	1.5129	0.0312384	0
cg05563333	X	11777722	F	MSL3	Body	2.02157	0.0173959	0	1.97867	0.0182692	0
cg05566296	X	136114047	F	GPR101	TSS1500	2.07272	0.012354	0	2.04412	0.0126954	0
cg05578291	X	24042365	R	KLHL15	5'UTR	1.91369	0.0214194	0	1.89284	0.0220491	0
cg05580931	X	15683218	F	TMEM27	TSS200	-1.49092	0.0305486	0	-1.40645	0.0310324	0
cg05585317	X	53117682	F	TSPYL2	3'UTR	1.42419	0.0355285	0	1.44749	0.0359482	0
cg05587158	X	69487748	R	ARR3	TSS1500	-1.76459	0.0256966	0	-1.78294	0.0268772	0
cg05592527	X	100872988	R	ARMCX6	1stExon	2.04215	0.0155242	0	2.02594	0.0158513	0
cg05594230	X	70712403	F	INGX	Body	1.83275	0.0269903	0	1.76796	0.0277128	0
cg05599151	X	53111398	R	TSPYL2	TSS200	1.93698	0.0210934	0	1.90602	0.0201575	0
cg05600581	X	134232907	F	NCRNA00087	TSS200	1.98479	0.0176353	0	1.95285	0.01862	0
cg05605384	X	77395277	F	TAF9B	TSS200	2.06596	0.017064	0	2.02107	0.0182447	0
cg05630320	X	133594116	R	HPRT1	TSS200	2.08953	0.0165685	0	2.03782	0.01681	0
cg05633597	X	56258193	R	KLF8	TSS1500	-1.80855	0.025968	0	-1.76315	0.0277615	0
cg05638634	X	139850091	R			-1.4749	0.0353586	0	-1.51134	0.0361826	0
cg05652828	X	47445107	R	TIMP1	Body	-1.55617	0.030913	0	-1.5748	0.0315056	0
cg05666266	X	68725596	R	FAM155B	1stExon	2.02764	0.0151259	0	2.01208	0.0152279	0
cg05673346	X	38662707	R	MID1IP1	5'UTR	2.06336	0.0133979	0	2.02247	0.0138653	0
cg05679489	X	148552714	R			1.8778	0.0236905	0	1.87761	0.0246295	0
cg05684200	X	136626364	R			-1.58311	0.032916	0	-1.58645	0.0337285	0
cg05687312	X	63425794	R	FAM123B	TSS200	2.03148	0.0175487	0	2.00353	0.0181984	0
cg05688478	X	128789194	F	APLN	TSS1500	2.07016	0.0142096	0	2.05841	0.0136963	0
cg05689984	X	101145826	F	ZMAT1	TSS1500	-1.56385	0.0330268	0	-1.56759	0.0344734	0
cg05692422	X	42637044	R	PPP1R2P9	Body	-1.90342	0.0233116	0	-1.90546	0.0242697	0
cg05695959	X	39867476	R			-1.79415	0.0205754	0	-1.77428	0.0218733	0
cg05699139	X	95940153	F	DIAPH2	1stExon	2.00219	0.0172395	0	1.93856	0.0186003	0
cg05704524	X	119378521	F	CXorf42	Body	2.09775	0.0110026	0	2.07561	0.011757	0
cg05706696	X	129254556	R			2.08413	0.013352	0	2.04974	0.0143463	0
cg05707218	X	153234476	F	HCFC1	Body	1.96911	0.0189247	0	1.97266	0.0189427	0
cg05707815	X	71934233	F	PHKA1	TSS1500	2.1273	0.0102285	0	2.10245	0.00993423	0
cg05721877	X	39953075	F	BCOR	5'UTR	-1.94177	0.0222016	0	-1.88624	0.0226292	0
cg05740522	X	130036828	F	ENOX2	5'UTR	2.11437	0.0102114	0	2.09616	0.0102591	0
cg05740959	X	49087234	R	CACNA1F	Body	2.0766	0.0165171	0	2.08032	0.016191	0
cg05747459	X	21393306	R	CNKSR2	Body	2.05377	0.0134678	0	2.03319	0.0137126	0
cg05748359	X	149109080	R	LOC100272228	Body	1.54702	0.0310075	0	1.60159	0.0316476	0
cg05749792	X	69397704	R	DGAT2L6	Body	-1.53499	0.0323478	0	-1.45772	0.0344365	0
cg05777666	X	103499734	F	ESX1	TSS200	2.02159	0.0177114	0	2.00006	0.0180594	0
cg05782106	X	9754927	F	SHROOM2	Body	1.83844	0.0217853	0	1.76725	0.023665	0
cg05782651	X	109561747	F	AMMECR1	5'UTR	2.02412	0.0186609	0	2.01424	0.0189099	0
cg05782751	X	119737675	F	MCTS1	TSS1500	1.90533	0.0220963	0	1.91111	0.0224901	0
cg05782975	X	102631408	R	NGFRAP1	TSS1500	2.07105	0.0152666	0	2.04701	0.0152954	0
cg05785344	X	129118279	R	BCORL1	5'UTR	2.07877	0.0120931	0	2.06507	0.0121065	0
cg05786601	X	66764126	R	AR	1stExon	2.01907	0.016048	0	1.98738	0.0162951	0
cg05788681	X	103499545	R	ESX1	5'UTR	2.01361	0.015479	0	1.99398	0.0159897	0
cg05789980	X	119442797	F	FAM70A	Body	1.31538	0.0330219	0	1.3168	0.033848	0
cg05793108	X	118012978	R			-1.59124	0.0313883	0	-1.55997	0.0335662	0
cg05799859	X	153744612	F	FAM3A	TSS200	2.11935	0.0108546	0	2.1009	0.011221	0
cg05801573	X	142722740	F	SLITRK4	5'UTR	1.75186	0.0240098	0	1.73502	0.0249919	0
cg05803370	X	153715241	R	UBL4A	TSS1500	2.06845	0.0123288	0	2.04526	0.0127563	0
cg05803913	X	38664442	F	MID1IP1	Body	2.09104	0.0128563	0	2.07526	0.0124097	0
cg05803942	X	67906758	R	STARD8	5'UTR	1.97449	0.0180506	0	1.95835	0.0192691	0
cg05804339	X	40036023	F	BCOR	5'UTR	1.5268	0.0326387	0	1.43099	0.0353472	0
cg05806018	X	147582520	R	AFF2	1stExon	2.10484	0.0101565	0	2.07528	0.0110561	0
cg05807734	X	129258475	F			-1.47638	0.0341188	0	-1.51877	0.0347985	0
cg05829338	X	106750612	R			1.87778	0.0228996	0	1.84711	0.0234009	0
cg05832562	X	100878294	R	ARMCX3	TSS200	2.07076	0.0162067	0	2.0567	0.01647	0
cg05835545	X	80065003	R	BRWD3	1stExon	2.0564	0.0133126	0	2.0471	0.0135497	0
cg05837905	X	30907698	R	MAP3K7IP3	TSS200	2.10397	0.0110866	0	2.06488	0.0112784	0
cg05849149	X	68048224	R	EFNB1	TSS1500	2.05286	0.0139609	0	2.02468	0.0144032	0
cg05849875	X	151806628	F	GABRQ	TSS200	1.98063	0.0180459	0	1.96652	0.0180517	0
cg05861409	X	118533164	R	SLC25A43	TSS200	2.1027	0.0119176	0	2.0848	0.0119611	0
cg05866836	X	106960378	R	TSC22D3	TSS200	1.3742	0.0278131	0	1.35406	0.0307644	0
cg05867448	X	130192575	R	FLJ30058	5'UTR	1.69248	0.0239279	0	1.63097	0.0241492	0
cg05870108	X	106749745	R			1.56887	0.0310386	0	1.60246	0.0300463	0
cg05872215	X	128913854	R	SASH3	TSS200	2.10666	0.0110446	0	2.07451	0.0112093	0
cg05872222	X	71459071	F	ERCC6L	TSS1500	2.07686	0.0144252	0	2.02856	0.0153401	0
cg05872808	X	153657411	F	ATP6AP1	Body	2.13731	0.0101134	0	2.11705	0.00981208	0
cg05877833	X	54957261	R	TRO	Body	-1.47962	0.0338974	0	-1.52132	0.0344178	0
cg05880897	X	151129555	F	GABRE	Body	-1.55665	0.0274156	0	-1.49949	0.0292044	0
cg05884886	X	133370915	R	CCDC160	TSS200	1.79737	0.0251793	0	1.68366	0.0285654	0
cg05887304	X	12809548	F	PRPS2	1stExon	2.016	0.0180488	0	2.00804	0.0183506	0
cg05889642	X	133931164	R	FAM122B	5'UTR	2.11412	0.00953417	0	2.09068	0.00933902	0
cg05892376	X	135862961	R	ARHGEF6	1stExon	2.12906	0.0121122	0	2.10417	0.0123889	0
cg05893072	X	107979700	F	IRS4	TSS200	1.97833	0.0176458	0	1.96114	0.018124	0
cg05895666	X	118532787	F	SLC25A43	TSS1500	1.83534	0.0263549	0	1.79605	0.0273672	0
cg05896813	X	51636892	R	MAGED1	5'UTR	1.67713	0.0324738	0	1.66586	0.03306	0
cg05899258	X	34165079	R			-1.906	0.0214237	0	-1.88462	0.0227572	0
cg05899999	X	100603765	F	TIMM8A	TSS200	2.13292	0.0103764	0	2.11096	0.0101948	0
cg05902740	X	109698667	R	RGAG1	3'UTR	-1.62086	0.0283213	0	-1.61152	0.0300708	0
cg05905814	X	150151809	F	HMGB3	1stExon	2.13113	0.0114606	0	2.10427	0.0118999	0
cg05906362	X	153192754	F	ARHGAP4	TSS1500	1.94234	0.0205978	0	1.91168	0.0216662	0
cg05907136	X	134156306	R	FAM127C	1stExon	2.0828	0.0136341	0	2.06856	0.0137674	0
cg05908188	X	134478884	R	ZNF75D	TSS1500	2.09093	0.0108057	0	2.07297	0.0102241	0
cg05911704	X	129304869	R	RAB33A	TSS1500	2.13775	0.011045	0	2.10822	0.0110025	0
cg05914696	X	68114669	F			2.01069	0.0194787	0	2.00163	0.0201691	0
cg05915658	X	132552653	F			-1.28622	0.0318864	0	-1.2314	0.0327771	0
cg05921207	X	110038886	F	CHRDL1	5'UTR	2.01076	0.0190243	0	1.9617	0.0186753	0
cg05922253	X	50213977	R	DGKK	TSS1500	2.03766	0.0167301	0	1.9695	0.0174087	0
cg05929502	X	48395055	R			-1.69972	0.0270302	0	-1.60661	0.0281376	0
cg05929865	X	70128121	R	TEX11	5'UTR	-1.39785	0.0278759	0	-1.33662	0.029044	0
cg05933703	X	51361383	F			2.02717	0.0154243	0	1.98881	0.0159427	0
cg05935584	X	150151823	F	HMGB3	1stExon	2.06789	0.0116079	0	2.06061	0.0111287	0
cg05939965	X	118983320	F	UPF3B	Body	1.32568	0.0289019	0	1.27464	0.0298732	0
cg05941375	X	154299737	R	BRCC3	5'UTR	2.03074	0.0133337	0	2.0398	0.0111515	0
cg05947181	X	50557283	F	SHROOM4	TSS1500	1.97646	0.0168758	0	1.95807	0.0178391	0
cg05950094	X	16964965	R	REPS2	5'UTR	1.87365	0.0240265	0	1.86227	0.0255623	0
cg05958126	X	19533458	R	MAP3K15	TSS200	2.08251	0.0106302	0	2.05532	0.0103537	0
cg05961595	X	55026485	R	APEX2	TSS1500	2.08762	0.0119944	0	2.07505	0.0118779	0
cg05965444	X	134049328	R	MOSPD1	TSS200	2.1117	0.0101056	0	2.08106	0.00964297	0
cg05975021	X	11310708	F	ARHGAP6	Body	-1.74565	0.0261012	0	-1.70042	0.0272038	0
cg05994819	X	103411244	R	CXorf39	TSS200	2.10767	0.0111407	0	2.08035	0.0104932	0
cg05996238	X	55115370	F	PAGE2	TSS200	-1.5592	0.0329459	0	-1.56597	0.0328016	0
cg05996419	X	38663393	F	MID1IP1	5'UTR	2.10367	0.0117679	0	2.08369	0.011191	0
cg06002470	X	124339860	F			1.97264	0.0196563	0	1.97189	0.0199153	0
cg06016684	X	20134557	F	MAP7D2	Body	1.69955	0.0306637	0	1.6299	0.0325953	0
cg06022838	X	153238133	F	TMEM187	1stExon	1.85589	0.026618	0	1.84555	0.0281973	0
cg06027835	X	48456564	R	WDR13	Body	2.0554	0.0162511	0	2.02272	0.0164114	0
cg06036585	X	70521462	R	ITGB1BP2	TSS200	-1.50572	0.0335268	0	-1.52181	0.0349687	0
cg06039729	X	118827102	F	2006-09-01	5'UTR	2.06311	0.0191705	0	2.00923	0.0208631	0
cg06041068	X	152990341	R	BCAP31	TSS1500	2.10436	0.0124942	0	2.06422	0.0121328	0
cg06042004	X	153707710	F	LAGE3	TSS200	2.11588	0.00923266	0	2.08587	0.00992216	0
cg06051391	X	131352293	R	RAP2C	TSS200	2.09433	0.0107576	0	2.08237	0.0106595	0
cg06053110	X	51636681	R	MAGED1	5'UTR	1.84915	0.0266396	0	1.79112	0.0276931	0
cg06055266	X	53111187	R	TSPYL2	TSS1500	1.95121	0.0183247	0	1.95512	0.0188142	0
cg06055478	X	62974905	F	ARHGEF9	1stExon	2.07857	0.011026	0	2.05847	0.0110791	0
cg06068202	X	150343148	R			1.92474	0.020661	0	1.91493	0.0212776	0
cg06069996	X	54466836	R	TSR2	TSS200	1.75068	0.0243557	0	1.68851	0.0263584	0
cg06070578	X	102602857	R			-1.71328	0.029298	0	-1.70274	0.0309341	0
cg06072560	X	100075379	R	CSTF2	1stExon	2.07256	0.0120257	0	2.04653	0.0117161	0
cg06077978	X	48690457	R	PCSK1N	Body	1.98725	0.0176119	0	1.96335	0.0181731	0
cg06079646	X	24711474	F	POLA1	TSS1500	1.92844	0.0224242	0	1.87527	0.0236795	0
cg06079963	X	24711994	F	POLA1	TSS200	2.10297	0.0107329	0	2.08378	0.0104042	0
cg06084034	X	153637827	R	DNASE1L1	5'UTR	1.39592	0.024814	0	1.47547	0.0259484	0
cg06093412	X	47518594	R	LOC100133957	Body	2.06057	0.0124707	0	2.03833	0.0124923	0
cg06097615	X	68723812	R	FAM155B	TSS1500	2.11696	0.0121012	0	2.09561	0.0126493	0
cg06098232	X	149106699	R	LOC100272228	TSS200	2.10321	0.0120254	0	2.08847	0.0114163	0
cg06099218	X	39473248	R			1.87565	0.0245744	0	1.83456	0.0257147	0
cg06102971	X	17878442	R	RAI2	5'UTR	2.09505	0.0122851	0	2.07461	0.0118532	0
cg06104510	X	19002482	F	PHKA2	TSS200	1.99415	0.0158003	0	1.97054	0.0167542	0
cg06104959	X	67913324	F	STARD8	TSS200	1.90059	0.0179143	0	1.90065	0.0181842	0
cg06116594	X	70180220	F			-1.50396	0.0283567	0	-1.47268	0.0274675	0
cg06122016	X	47039463	R	RBM10	Body	-1.75447	0.0254275	0	-1.72183	0.0266516	0
cg06124711	X	153640000	F	TAZ	5'UTR	2.05197	0.0130561	0	2.04512	0.0128846	0
cg06126323	X	68836571	R	EDA	Body	2.03133	0.0162518	0	2.01481	0.0173997	0
cg06127902	X	24072962	R	EIF2S3	TSS200	-1.31791	0.0296671	0	-1.32743	0.0292187	0
cg06130360	X	117633362	F	DOCK11	Body	-1.66743	0.0287814	0	-1.62638	0.0299273	0
cg06135529	X	118986703	F	UPF3B	Body	2.03298	0.0159297	0	2.00701	0.0169544	0
cg06135650	X	38662916	F	MID1IP1	5'UTR	1.83339	0.026926	0	1.84779	0.0275909	0
cg06136002	X	150151615	R	HMGB3	TSS200	2.11503	0.0101303	0	2.104	0.0100448	0
cg06137672	X	153060026	R	IDH3G	TSS200	2.08433	0.0119159	0	2.05343	0.0126071	0
cg06139288	X	11683125	F	ARHGAP6	1stExon	1.98249	0.0157774	0	1.96026	0.0161878	0
cg06140460	X	48828397	R	KCND1	TSS200	2.03658	0.013987	0	2.0133	0.0140362	0
cg06140761	X	48915032	F	CCDC120	TSS1500	-1.86935	0.0215296	0	-1.83909	0.0231927	0
cg06143713	X	62856362	R	ARHGEF9	3'UTR	-1.94752	0.0148653	0	-1.92725	0.0154503	0
cg06144608	X	149737646	F	MTM1	5'UTR	2.10159	0.0126115	0	2.07858	0.0127081	0
cg06144825	X	80457687	F	HMGN5	TSS1500	1.97167	0.0214527	0	1.91059	0.0224939	0
cg06144999	X	11129626	R	HCCS	5'UTR	2.13312	0.0096989	0	2.11553	0.010054	0
cg06145357	X	149010149	F	MAGEA8	5'UTR	-1.88336	0.0206235	0	-1.84843	0.0224927	0
cg06148972	X	149736729	F	MTM1	TSS1500	1.45642	0.0235638	0	1.46251	0.0250205	0
cg06149454	X	149533026	F			2.0971	0.0117194	0	2.06824	0.0121945	0
cg06152434	X	139585460	F	SOX3	3'UTR	2.01539	0.015173	0	1.96788	0.0150758	0
cg06158088	X	47518504	F	LOC100133957	Body	2.09376	0.0101277	0	2.08213	0.00949516	0
cg06159667	X	103268258	F	H2BFWT	TSS200	-1.60915	0.0315044	0	-1.57086	0.032831	0
cg06162422	X	100663051	R	HNRNPH2	TSS200	2.08112	0.0145616	0	2.04036	0.0151784	0
cg06164717	X	136114030	F	GPR101	TSS200	2.09248	0.0137452	0	2.05693	0.013501	0
cg06170080	X	71089531	F			1.89389	0.020803	0	1.91498	0.0210984	0
cg06170215	X	71525152	R	CITED1	5'UTR	1.89032	0.0207906	0	1.87629	0.0214098	0
cg06172626	X	48398133	R	TBC1D25	1stExon	2.03924	0.0189116	0	2.01665	0.0191157	0
cg06174815	X	147582133	R	AFF2	TSS200	1.97719	0.0182125	0	1.97381	0.0182627	0
cg06184979	X	107225589	R	TEX13B	5'UTR	-1.66027	0.0306058	0	-1.64793	0.0318783	0
cg06185870	X	54666407	F			2.11831	0.0100171	0	2.0963	0.00979733	0
cg06190216	X	152771994	F	BGN	Body	-1.60257	0.0287863	0	-1.52134	0.0310771	0
cg06206449	X	118708409	F	UBE2A	TSS200	2.04645	0.0129744	0	2.03196	0.0129816	0
cg06213900	X	39436753	R			-1.50416	0.0324324	0	-1.46157	0.033582	0
cg06219046	X	48382288	R	EBP	Body	-1.67005	0.0303866	0	-1.64904	0.0313405	0
cg06220755	X	17821058	F	RAI2	5'UTR	-1.50198	0.0339471	0	-1.43234	0.0348285	0
cg06223806	X	136113998	F	GPR101	TSS200	2.02718	0.0164647	0	2.01215	0.0164486	0
cg06228453	X	106242522	F	MORC4	Body	2.06348	0.0149221	0	2.02321	0.0158505	0
cg06231618	X	40504059	F	CXorf38	Body	1.93209	0.0194499	0	1.95662	0.0199008	0
cg06232846	X	70389504	R	NLGN3	Body	-1.97894	0.0181254	0	-1.95942	0.0188015	0
cg06252876	X	129299948	R	AIFM1	TSS200	2.05082	0.0138297	0	2.03484	0.0143418	0
cg06266461	X	153719192	R	SLC10A3	TSS200	2.08787	0.0104958	0	2.06858	0.0101344	0
cg06267144	X	136647760	R	ZIC3	TSS1500	1.81287	0.0233052	0	1.7555	0.0242472	0
cg06268905	X	135633029	F	VGLL1	Body	-1.46048	0.0348754	0	-1.42963	0.0358905	0
cg06269080	X	19003031	F	PHKA2	TSS1500	2.09957	0.0108585	0	2.07086	0.0110835	0
cg06270497	X	67906442	R	STARD8	5'UTR	1.90078	0.0206274	0	1.85707	0.0213033	0
cg06272245	X	48398018	R	TBC1D25	TSS200	1.7737	0.0282237	0	1.79315	0.0286362	0
cg06273903	X	118707913	R	UBE2A	TSS1500	2.06242	0.013858	0	2.03962	0.0143569	0
cg06277838	X	73641370	F	SLC16A2	1stExon	2.09174	0.0118873	0	2.07572	0.0114004	0
cg06282524	X	139593371	F			1.79671	0.0222594	0	1.74459	0.0229785	0
cg06289882	X	129535465	F	RBMX2	TSS1500	1.5405	0.0337391	0	1.50228	0.0348269	0
cg06293983	X	135863104	R	ARHGEF6	5'UTR	1.98328	0.0181872	0	1.96991	0.0186912	0
cg06295352	X	130037150	F	ENOX2	5'UTR	2.08985	0.0118861	0	2.07261	0.0129091	0
cg06297686	X	48755002	R	TIMM17B	Body	2.10341	0.0111024	0	2.09584	0.0105499	0
cg06298190	X	138913929	R	ATP11C	Body	1.43322	0.032083	0	1.42801	0.0337733	0
cg06298361	X	49091907	R	CCDC22	TSS200	2.10421	0.0110202	0	2.06441	0.0116104	0
cg06300107	X	63616425	R	MTMR8	TSS1500	-1.91602	0.0183953	0	-1.84622	0.0196732	0
cg06300944	X	153141270	F	L1CAM	1stExon	1.89641	0.0234329	0	1.88645	0.0238787	0
cg06302025	X	102000758	R	BHLHB9	TSS200	1.99868	0.0178293	0	1.97081	0.017656	0
cg06302218	X	102566123	R	BEX2	TSS200	2.01811	0.0174404	0	2.01481	0.0171162	0
cg06302402	X	3224570	R			1.73832	0.0267782	0	1.71243	0.0274453	0
cg06308972	X	114884097	R	PLS3	3'UTR	-1.76852	0.0240096	0	-1.73322	0.0251387	0
cg06310022	3	114095810	F	ZBTB20	5'UTR	-1.59412	0.0303596	0	-1.52785	0.0335492	0
cg06323119	X	18238233	R	BEND2	Body	-1.37418	0.0321176	0	-1.34434	0.0338404	0
cg06323885	X	102883827	R	TCEAL1	TSS200	2.11304	0.0116627	0	2.10586	0.0113529	0
cg06327799	X	64196367	R	ZC4H2	TSS200	2.06429	0.0150686	0	2.04905	0.0153967	0
cg06334238	X	153284899	R	IRAK1	Body	2.04947	0.0134045	0	2.03623	0.013036	0
cg06338119	X	109661862	F	AMMECR1	5'UTR	-1.44257	0.0290997	0	-1.42034	0.0300346	0
cg06341336	X	55026590	F	APEX2	TSS200	2.11815	0.0107171	0	2.09462	0.011274	0
cg06349546	22	43011285	F	POLDIP3	TSS1500	1.53246	0.0305693	0	1.53479	0.0317091	0
cg06350107	X	38210221	R			-1.72532	0.0286761	0	-1.67309	0.0306401	0
cg06350796	X	106449867	F	CXorf41	5'UTR	1.98342	0.0205812	0	1.93298	0.0213586	0
cg06358300	9	84302344	R	TLE1	Body	1.86181	0.0239083	0	1.85841	0.0238437	0
cg06363801	X	134049271	F	MOSPD1	5'UTR	2.1074	0.01019	0	2.08055	0.0102769	0
cg06372522	X	118374789	F	PGRMC1	Body	-1.42695	0.0356041	0	-1.3968	0.0354197	0
cg06373526	X	51139183	F			2.0225	0.015127	0	1.99259	0.0153243	0
cg06376033	X	102883934	R	TCEAL1	1stExon	1.86222	0.0194064	0	1.81914	0.0203995	0
cg06380355	X	51239518	R	NUDT11	TSS200	2.09319	0.014839	0	2.06933	0.0150356	0
cg06384623	X	133119308	F	GPC3	1stExon	2.05504	0.0150455	0	2.01893	0.0159468	0
cg06392956	X	64254409	R			1.86394	0.0223713	0	1.84694	0.0232617	0
cg06400167	X	152875645	F			2.02381	0.0161424	0	2.02031	0.0161912	0
cg06408025	X	106449904	R	CXorf41	5'UTR	2.12696	0.0105862	0	2.09746	0.0107409	0
cg06408185	X	18443714	R	CDKL5	TSS200	2.0013	0.0185196	0	1.97272	0.0193916	0
cg06408301	X	37208607	R	PRRG1	1stExon	1.93848	0.0169817	0	1.88298	0.0181337	0
cg06409934	X	100184041	F	XKRX	TSS200	2.07484	0.0152329	0	2.0705	0.0155334	0
cg06411441	X	100307072	R	TRMT2B	1stExon	2.04924	0.0138933	0	2.03263	0.0149586	0
cg06416685	X	99891793	F	TSPAN6	5'UTR	1.85776	0.0270597	0	1.74933	0.0267412	0
cg06427226	X	105969730	R	RNF128	TSS200	2.00899	0.0163673	0	1.98338	0.0165261	0
cg06428055	X	129243872	R	ELF4	5'UTR	2.08898	0.0117673	0	2.0772	0.0118323	0
cg06428288	X	15511530	F	PIR	TSS200	2.04865	0.0151966	0	2.01893	0.0158871	0
cg06431415	X	133115985	R	GPC3	Body	-1.77766	0.0267852	0	-1.7211	0.0270363	0
cg06438901	X	48937877	R	WDR45	TSS1500	2.09401	0.0113223	0	2.07062	0.0110755	0
cg06439589	X	153061818	R	SSR4	Body	-1.43254	0.0331727	0	-1.45188	0.0345572	0
cg06441867	X	71130729	R	NHSL2	TSS1500	2.09985	0.0113338	0	2.085	0.0113411	0
cg06442844	X	117958793	R	ZCCHC12	5'UTR	1.44952	0.0343887	0	1.51451	0.0345597	0
cg06443675	X	103401820	R	MCART6	TSS200	2.11276	0.0118037	0	2.08937	0.0116701	0
cg06443888	X	107980132	R	IRS4	TSS1500	2.02176	0.0165448	0	1.97342	0.0172135	0
cg06444329	X	75392755	F	CXorf26	TSS200	1.91756	0.0218571	0	1.88418	0.0224701	0
cg06452970	X	13835264	R	GPM6B	1stExon	-1.63746	0.0308098	0	-1.62417	0.0294235	0
cg06454337	X	15683427	R	TMEM27	TSS1500	-1.41074	0.0344026	0	-1.45629	0.03401	0
cg06454951	X	15683334	R	TMEM27	TSS200	-1.55838	0.0298238	0	-1.52723	0.0305202	0
cg06455206	X	49643431	F	USP27X	TSS1500	1.58391	0.0259001	0	1.51109	0.0267528	0
cg06455967	X	110187421	F	PAK3	TSS200	1.65925	0.0306868	0	1.62301	0.0316329	0
cg06457149	X	114468096	R	LRCH2	Body	1.4155	0.0345827	0	1.39254	0.035509	0
cg06457357	X	56259243	R	KLF8	5'UTR	1.6127	0.0318158	0	1.63552	0.0326191	0
cg06461462	X	106960878	F	TSC22D3	TSS1500	1.44424	0.0344928	0	1.45823	0.0325506	0
cg06462425	X	106045920	R	TBC1D8B	5'UTR	1.61189	0.0307427	0	1.57308	0.032928	0
cg06462431	X	69655158	R			1.91366	0.0165566	0	1.89938	0.0159696	0
cg06462727	X	106515879	R			1.99556	0.0169499	0	1.97041	0.0177754	0
cg06464066	X	16964808	R	REPS2	TSS200	2.05237	0.0135037	0	2.03308	0.013758	0
cg06465306	X	84503836	F	ZNF711	Body	-1.60189	0.0257753	0	-1.49193	0.0271249	0
cg06467636	X	150905602	R	CNGA2	5'UTR	-1.59107	0.0294647	0	-1.5288	0.0326496	0
cg06468442	X	106692682	R			2.09026	0.0126051	0	2.06303	0.0131398	0
cg06469252	X	136113985	F	GPR101	TSS200	2.04551	0.0152051	0	2.03896	0.0158514	0
cg06472116	X	46937653	R	RGN	TSS200	-1.51766	0.0292538	0	-1.49485	0.0318634	0
cg06475150	X	48937814	F	WDR45	TSS1500	2.13099	0.0102606	0	2.11049	0.0101773	0
cg06481089	X	51075797	F	NUDT10	5'UTR	2.10605	0.0107237	0	2.08543	0.0110895	0
cg06482328	X	119385834	F	ZBTB33	5'UTR	2.03665	0.0131101	0	2.01862	0.0131269	0
cg06489418	X	48334722	R	FTSJ1	5'UTR	2.09204	0.0104962	0	2.08026	0.0102937	0
cg06504563	X	64754017	F	LAS1L	Body	1.96776	0.0218036	0	1.94792	0.0214598	0
cg06505213	X	48769091	R	SLC35A2	5'UTR	2.09977	0.0115679	0	2.07273	0.0111729	0
cg06506080	X	70503908	R	NONO	5'UTR	2.04598	0.0158351	0	2.03517	0.0160248	0
cg06510592	X	103411278	R	CXorf39	TSS200	2.11883	0.00906557	0	2.0902	0.00955754	0
cg06511189	X	152864830	F	FAM58A	TSS200	2.04817	0.0146671	0	2.02647	0.0149979	0
cg06513359	X	47004280	F	NDUFB11	Body	2.11368	0.0100401	0	2.091	0.00956903	0
cg06514587	X	54666063	R			2.06323	0.0143994	0	2.04583	0.0151191	0
cg06521531	X	135229551	F	FHL1	Body	2.00989	0.0180322	0	1.96069	0.0191013	0
cg06525551	X	137792939	F	FGF13	Body	1.95873	0.0201252	0	1.9249	0.0212986	0
cg06526829	X	48828070	R	KCND1	1stExon	1.67892	0.0291477	0	1.69224	0.0295003	0
cg06534187	X	16887131	R	RBBP7	Body	2.02483	0.0181194	0	2.00768	0.0187041	0
cg06535161	X	17878715	F	RAI2	5'UTR	2.05839	0.0141686	0	2.0388	0.0146112	0
cg06538336	X	150346599	R	GPR50	Body	2.04888	0.0160639	0	2.02877	0.0165771	0
cg06539694	X	68348545	F			1.52195	0.0308142	0	1.42983	0.0317007	0
cg06540859	X	46434696	F	CHST7	1stExon	2.08341	0.0118229	0	2.05737	0.0119242	0
cg06544877	X	83757131	F	HDX	5'UTR	1.80483	0.0277548	0	1.72621	0.0294521	0
cg06549249	X	129040144	F	UTP14A	1stExon	2.11578	0.009237	0	2.09326	0.00912564	0
cg06551391	X	51636562	F	MAGED1	5'UTR	2.05767	0.013937	0	2.07754	0.0146212	0
cg06554760	X	153775341	F	IKBKG	TSS1500	1.9125	0.0209298	0	1.92125	0.0220676	0
cg06558166	X	132549003	R	GPC4	5'UTR	2.08716	0.0129516	0	2.05449	0.0128851	0
cg06558952	X	43514718	F	MAOA	TSS1500	2.08675	0.0145054	0	2.03954	0.0146362	0
cg06583412	X	102001318	R	BHLHB9	5'UTR	1.97369	0.0164915	0	1.97872	0.0158141	0
cg06614969	X	54835405	R	MAGED2	5'UTR	2.01289	0.0191799	0	1.97666	0.0191436	0
cg06615444	X	19533456	R	MAP3K15	TSS200	2.09393	0.0120091	0	2.05703	0.0122433	0
cg06616857	X	153719132	R	SLC10A3	TSS200	2.10751	0.0103401	0	2.07888	0.00991665	0
cg06619487	X	23353027	R	PTCHD1	1stExon	2.07272	0.0134057	0	2.04969	0.0132597	0
cg06620254	X	70503046	R	NONO	5'UTR	2.06401	0.015159	0	2.05074	0.0151297	0
cg06620299	X	130215993	F	FLJ30058	Body	2.02791	0.01512	0	2.01591	0.0152867	0
cg06621863	X	83443154	R	RPS6KA6	TSS1500	1.89927	0.0177147	0	1.85663	0.0189683	0
cg06623468	X	70838030	R	BCYRN1	Body	1.95664	0.0182277	0	1.97507	0.01854	0
cg06624712	X	73523965	F	ZCCHC13	TSS200	-1.6496	0.0295437	0	-1.59131	0.0315425	0
cg06624970	X	49643941	F	USP27X	TSS1500	2.10013	0.0112754	0	2.0898	0.0109828	0
cg06628622	X	34960829	R	FAM47B	TSS200	-1.86959	0.0234926	0	-1.85827	0.0249597	0
cg06630839	X	16964684	R	REPS2	TSS200	2.07166	0.0138794	0	2.02121	0.0148921	0
cg06633205	X	134656158	R	DDX26B	Body	2.01728	0.0171133	0	1.98996	0.0179429	0
cg06642617	2	73461528	R	CCT7	Body	-1.55621	0.031308	0	-1.5893	0.0322803	0
cg06645047	X	48858904	R	GRIPAP1	TSS1500	2.11111	0.0106293	0	2.08859	0.0113423	0
cg06649034	X	53349902	F	IQSEC2	1stExon	1.97269	0.0184659	0	1.94426	0.0193522	0
cg06650546	X	136633004	R			2.01492	0.0152551	0	1.98588	0.0152754	0
cg06650776	X	102632072	R	NGFRAP1	5'UTR	2.0998	0.0114676	0	2.07487	0.0112329	0
cg06650847	X	63004884	R			1.6702	0.0249827	0	1.65611	0.0262024	0
cg06655100	X	56259373	F	KLF8	5'UTR	2.02178	0.0161379	0	1.99048	0.0165526	0
cg06656651	X	9734210	F	GPR143	TSS1500	-1.66946	0.0311572	0	-1.67065	0.03195	0
cg06657741	X	135067456	R	SLC9A6	TSS200	2.06582	0.0158729	0	2.01453	0.0167851	0
cg06659128	X	154842535	R	TMLHE	5'UTR	2.04396	0.012946	0	2.01573	0.0134455	0
cg06667703	X	105854952	R	CXorf57	TSS1500	2.0151	0.0169399	0	2.00512	0.0177822	0
cg06672093	X	103502294	R			-1.63406	0.0301465	0	-1.63087	0.0297804	0
cg06673178	X	50557022	R	SHROOM4	5'UTR	2.11529	0.0101333	0	2.08681	0.0103541	0
cg06675660	X	128657364	R	SMARCA1	1stExon	2.05399	0.0139124	0	2.04288	0.0135356	0
cg06691299	X	47077361	F	CDK16	TSS1500	1.6748	0.0317568	0	1.63969	0.0327412	0
cg06692867	X	153560828	R			-1.64342	0.0310857	0	-1.62695	0.0325883	0
cg06700462	X	19002006	F	PHKA2	1stExon	2.06919	0.0107473	0	2.05708	0.010735	0
cg06705078	X	102884538	F	TCEAL1	5'UTR	2.07952	0.0132947	0	2.04946	0.0138472	0
cg06710937	13	23489940	F			1.77502	0.0236452	0	1.76299	0.0240739	0
cg06711837	X	137792814	R	FGF13	Body	1.95306	0.0174056	0	1.9045	0.0177234	0
cg06715672	X	136655987	F			1.57559	0.0286011	0	1.53035	0.0287842	0
cg06717971	X	101853857	R	ARMCX5	TSS1500	1.70129	0.0250833	0	1.69896	0.0262456	0
cg06720669	X	108868282	R	KCNE1L	1stExon	1.60899	0.0261586	0	1.60314	0.0267439	0
cg06721573	X	24483234	F	PDK3	TSS200	2.11758	0.0127395	0	2.07542	0.0125762	0
cg06731599	X	40440704	F	ATP6AP2	Body	2.08423	0.0119054	0	2.05389	0.0118064	0
cg06742180	X	123039177	R	XIAP	Body	-2.03148	0.0171167	0	-1.989	0.0180924	0
cg06746884	X	31285129	F	DMD	Body	1.88891	0.0223106	0	1.85514	0.0237649	0
cg06746903	X	103173284	F	MIR1256	Body	2.06141	0.0164981	0	2.01392	0.017635	0
cg06758848	X	153603268	F	FLNA	TSS1500	1.8297	0.0226884	0	1.80381	0.0235214	0
cg06767008	X	49114545	R	FOXP3	Body	1.43466	0.031413	0	1.40237	0.0319568	0
cg06769752	X	153978839	R	GAB3	Body	2.0893	0.0152996	0	2.05529	0.0166767	0
cg06772067	X	122993679	R	XIAP	TSS1500	2.09316	0.0137721	0	2.07674	0.0141594	0
cg06774124	X	106959517	F	TSC22D3	5'UTR	1.96702	0.0195901	0	1.97339	0.0194288	0
cg06774787	X	56258973	R	KLF8	5'UTR	1.99583	0.0169949	0	1.9599	0.0180899	0
cg06775759	X	21676994	R	KLHL34	TSS1500	1.85934	0.0187162	0	1.83754	0.0192566	0
cg06776123	X	57618144	F	ZXDB	TSS200	1.92285	0.0217842	0	1.88213	0.0225911	0
cg06776257	X	152912692	R	DUSP9	5'UTR	2.07873	0.0125198	0	2.06449	0.0124679	0
cg06778844	X	110335660	R	PAK3	5'UTR	-1.65803	0.0273804	0	-1.61581	0.0287835	0
cg06779458	X	152586916	F			1.9338	0.0199807	0	1.92484	0.0204575	0
cg06779802	X	107979401	F	IRS4	1stExon	1.97071	0.0169834	0	1.94312	0.0171828	0
cg06780606	X	69257154	R	EDA	3'UTR	-1.8204	0.0214409	0	-1.77793	0.0215774	0
cg06782349	X	33744708	R			1.85614	0.0239998	0	1.80145	0.0253171	0
cg06783548	X	47479436	R	SYN1	TSS200	2.09834	0.0130402	0	2.06849	0.0134629	0
cg06791102	X	153191600	F	ARHGAP4	1stExon	2.05842	0.0136245	0	2.0425	0.0138117	0
cg06792724	X	28605646	R	IL1RAPL1	TSS200	1.61286	0.0286833	0	1.61552	0.0309416	0
cg06793890	X	13338497	F	ATXN3L	1stExon	-1.49063	0.0329483	0	-1.48886	0.0335577	0
cg06796204	X	71351792	R	NHSL2	Body	2.16682	0.0116446	0	2.15853	0.0118575	0
cg06803079	X	47518114	F	UXT	Body	1.96942	0.0160963	0	1.93905	0.0168319	0
cg06804788	X	47696363	R	ZNF81	1stExon	1.77451	0.0277032	0	1.7673	0.0284913	0
cg06805513	X	73641955	F	SLC16A2	Body	2.05856	0.0152279	0	2.04144	0.0152407	0
cg06807018	X	119602917	R	LAMP2	Body	2.09488	0.0112979	0	2.06096	0.0121461	0
cg06809565	X	153236787	F	HCFC1	1stExon	2.00051	0.0198888	0	1.94329	0.0207504	0
cg06816704	X	152224966	F	PNMA3	1stExon	1.98985	0.0187396	0	1.9473	0.019992	0
cg06818142	X	100603949	F	TIMM8A	1stExon	2.1183	0.0114305	0	2.07442	0.0120263	0
cg06822229	X	108976856	F	ACSL4	TSS1500	2.07124	0.0133491	0	2.03096	0.0135711	0
cg06831832	X	142117264	F	SPANXN4	Body	-1.56879	0.0282714	0	-1.53167	0.0291267	0
cg06833902	X	44703210	R	DUSP21	TSS200	-1.84696	0.0256831	0	-1.81698	0.0270635	0
cg06834235	X	48334621	F	FTSJ1	5'UTR	2.10054	0.0107978	0	2.09114	0.0110362	0
cg06839398	X	39949008	R	BCOR	5'UTR	-1.6651	0.0229407	0	-1.65821	0.0229472	0
cg06848990	X	112082290	R	AMOT	5'UTR	-1.67288	0.0296336	0	-1.60276	0.029866	0
cg06852103	X	48334966	R	FTSJ1	5'UTR	1.96031	0.0204115	0	1.97344	0.0204856	0
cg06870560	X	115009194	F			-1.89326	0.0225742	0	-1.88075	0.0219961	0
cg06876079	X	35937780	R	CXorf22	TSS200	1.70839	0.0301786	0	1.68382	0.0318115	0
cg06879828	X	100333798	R	TMEM35	TSS200	1.53566	0.0333783	0	1.50315	0.0338782	0
cg06883934	X	2984578	F	ARSF	TSS1500	1.72707	0.0254391	0	1.64931	0.0283913	0
cg06891491	X	134429749	F	ZNF75D	5'UTR	1.86169	0.0264039	0	1.85252	0.0261893	0
cg06892157	X	129084138	F			-1.57951	0.0318448	0	-1.6273	0.0297834	0
cg06895515	X	47050149	R	UBA1	TSS200	1.931	0.0197188	0	1.89418	0.021395	0
cg06899582	X	129402809	F	ZNF280C	1stExon	2.05928	0.0163594	0	2.03678	0.0170338	0
cg06900776	X	100878107	F	ARMCX3	TSS200	2.08534	0.0129119	0	2.06167	0.0133609	0
cg06902764	X	139586086	F	SOX3	1stExon	1.86266	0.0228857	0	1.82687	0.0235216	0
cg06908232	X	128977816	F	ZDHHC9	TSS1500	2.11709	0.0123536	0	2.09659	0.0125594	0
cg06909745	X	52005415	F			1.80014	0.0244087	0	1.73848	0.0262285	0
cg06915321	X	136648249	F	ZIC3	TSS200	1.84232	0.0216712	0	1.77612	0.0219048	0
cg06915915	X	129657974	F			1.79719	0.0256178	0	1.80524	0.0257276	0
cg06918955	X	119760024	R	C1GALT1C1	3'UTR	-1.77228	0.0252927	0	-1.70582	0.0272535	0
cg06919398	X	153665799	F	GDI1	Body	1.96938	0.0200961	0	1.92569	0.0206498	0
cg06920429	X	131353502	F	RAP2C	TSS1500	2.05262	0.0180433	0	2.02629	0.0186387	0
cg06921456	X	153189769	R	ARHGAP4	Body	2.10771	0.00996744	0	2.10064	0.00971146	0
cg06921685	X	119005865	R	NDUFA1	1stExon	2.10698	0.0121627	0	2.07497	0.0123863	0
cg06922569	X	47420444	F	ARAF	TSS200	2.02986	0.017541	0	2.02282	0.0178019	0
cg06925836	X	48542214	R	WAS	5'UTR	1.4155	0.0335869	0	1.48891	0.033393	0
cg06936709	X	83757476	R	HDX	TSS200	2.00511	0.017359	0	1.95977	0.0178785	0
cg06939792	X	37764816	R			1.71419	0.028384	0	1.74433	0.0297858	0
cg06942445	X	54947373	F	TRO	5'UTR	2.08599	0.0130145	0	2.06981	0.0128709	0
cg06943437	X	64887365	R	MSN	TSS200	1.93885	0.0218658	0	1.94609	0.0217262	0
cg06943593	X	25030643	R	ARX	Body	2.04517	0.0143217	0	2.0369	0.0140233	0
cg06944050	X	118109068	R	LONRF3	1stExon	2.06547	0.0131413	0	2.05271	0.013417	0
cg06944922	X	38186842	R	RPGR	TSS200	2.02132	0.0175396	0	2.0238	0.0178942	0
cg06945800	X	118892610	R	ANKRD58	1stExon	2.08193	0.0117696	0	2.07001	0.0118089	0
cg06948553	X	40037418	F	BCOR	TSS1500	1.6495	0.0240062	0	1.65847	0.0247887	0
cg06953627	X	70711445	R	INGX	Body	-1.81201	0.0271451	0	-1.78125	0.0297409	0
cg06957108	X	152082798	R	ZNF185	TSS200	-1.50408	0.0328808	0	-1.44215	0.0350008	0
cg06964654	X	139590383	R			1.87173	0.0191573	0	1.82241	0.019611	0
cg06967228	X	68525725	R			1.88893	0.0223127	0	1.84679	0.0229782	0
cg06971254	X	48755675	R	PQBP1	5'UTR	1.95604	0.0189075	0	1.94247	0.019357	0
cg06980881	X	100673431	F	ARMCX4	Body	2.05902	0.0131212	0	2.05161	0.0127911	0
cg06981242	X	138287529	F	FGF13	TSS1500	2.08242	0.0138091	0	2.05967	0.0143933	0
cg07005924	X	37001209	F			-1.47124	0.0290398	0	-1.32372	0.03078	0
cg07010478	X	70507624	R	NONO	5'UTR	-1.43137	0.0277496	0	-1.40335	0.0277927	0
cg07011790	X	102883836	R	TCEAL1	TSS200	2.09224	0.0121648	0	2.08297	0.0117981	0
cg07012573	X	102470153	R	BEX4	1stExon	2.08168	0.0127988	0	2.06227	0.0128775	0
cg07038409	X	47509941	F	ELK1	5'UTR	2.12156	0.00973432	0	2.09627	0.00983116	0
cg07042747	X	131158005	F	MST4	Body	2.06067	0.0148082	0	2.05718	0.0147667	0
cg07051162	X	30671305	F	GK	TSS200	1.98582	0.0185222	0	1.97953	0.0190455	0
cg07051329	X	110039369	F	CHRDL1	TSS200	2.05366	0.0149403	0	2.00624	0.0168961	0
cg07053880	X	151143515	R	GABRE	TSS1500	1.9547	0.0190612	0	1.91114	0.020256	0
cg07055143	X	55477154	R	MAGEH1	TSS1500	-1.78893	0.0247427	0	-1.78293	0.0259031	0
cg07055845	X	10588667	R	MID1	5'UTR	1.8059	0.0269042	0	1.78181	0.0274683	0
cg07056506	X	103357323	R	MCART6	5'UTR	2.11659	0.00970276	0	2.09115	0.00971929	0
cg07056550	X	71459039	F	ERCC6L	TSS200	2.09668	0.0123919	0	2.06648	0.012288	0
cg07066594	X	64195554	F	ZC4H2	Body	1.83009	0.0241095	0	1.76019	0.0262086	0
cg07069660	X	49957476	F	AKAP4	Body	-1.65069	0.0260819	0	-1.58331	0.027826	0
cg07086565	X	153236942	R	TMEM187	TSS1500	2.06393	0.013741	0	2.04104	0.0146192	0
cg07088622	X	22290906	F	ZNF645	TSS200	-1.51564	0.0325956	0	-1.43315	0.0344116	0
cg07089242	X	149106617	F	LOC100272228	TSS200	2.12435	0.0103543	0	2.1068	0.00999368	0
cg07091641	X	102533112	R	TCEAL5	TSS1500	-1.80895	0.0259361	0	-1.77816	0.0265397	0
cg07098277	X	106361852	F	RBM41	Body	1.56253	0.0330432	0	1.48887	0.0325553	0
cg07099245	X	39954231	R	BCOR	5'UTR	1.97261	0.0170703	0	1.94978	0.0180861	0
cg07103644	X	30907643	F	MAP3K7IP3	TSS200	1.99646	0.0201308	0	1.97907	0.0203678	0
cg07109010	X	48958025	F	WDR45	5'UTR	2.08728	0.0116839	0	2.06782	0.0120781	0
cg07115537	X	37404647	F			-1.79827	0.0261452	0	-1.76464	0.0284537	0
cg07136610	X	53713793	F	HUWE1	TSS200	2.02991	0.0169762	0	2.00138	0.0176986	0
cg07136872	X	124337817	R			2.08464	0.0140904	0	2.06629	0.0145311	0
cg07137581	X	63425776	R	FAM123B	TSS200	2.09779	0.0132661	0	2.07423	0.0139086	0
cg07147350	X	146992908	F	ASFMR1	Body	1.63697	0.0291706	0	1.60536	0.0295612	0
cg07150680	X	53710374	F	HUWE1	5'UTR	2.01134	0.0177658	0	2.00007	0.0190349	0
cg07151929	X	30907787	F	MAP3K7IP3	TSS1500	1.98479	0.0183031	0	1.95776	0.0193626	0
cg07153944	X	48660373	R	HDAC6	TSS200	1.75005	0.0225815	0	1.75515	0.0233494	0
cg07156563	X	71525984	R	CITED1	TSS1500	1.88632	0.0250818	0	1.80126	0.0264712	0
cg07157700	X	133793475	R	PLAC1	TSS1500	-1.51901	0.0330099	0	-1.45304	0.0343736	0
cg07158153	X	129118568	R	BCORL1	5'UTR	1.73238	0.0303017	0	1.71797	0.0310346	0
cg07161993	X	48957691	F	WDR45	5'UTR	2.02237	0.0178855	0	1.98909	0.0185717	0
[truncated: 21,143 more rows]

## Sheet: Table S4
Table S4: 48 replicated age-by-sex-associated CpGs using the MCCS sample (p < 1.03E-7 for controls and p < 6.85E-4 for cases). Among them, 30 CpGs were replicated in two GS data (p < 0.0015).
CpG	CHR	MAPINFO	Strand	Gene	Gene feature	MCCS						GS
						Control_beta	Control_se	Control_P	Case_beta	Case_se	Case_P	Discovery.effect.size	Discovery.P.Value	Replication.effect.size	Replication.P.Value	Replicated
cg06758848	X	153603268	F	FLNA	TSS1500	0.143156	0.0184901	9.76525e-15	0.159354	0.0195338	3.41043e-16	0.00628	9.36e-20	0.0067	8.88e-50	Yes
cg13775533	X	99663073	F	PCDH19	1stExon	-0.141597	0.0185839	2.55026e-14	-0.0934693	0.0190009	8.68947e-07	-0.0157	6.16e-66	-0.0143	4.59e-123	Yes
cg22690188	X	64627670	F			-0.145338	0.0193046	5.12515e-14	-0.121312	0.0200112	1.34288e-09	Not capture in EPIC methylation array
cg22037209	X	64627254	R			-0.128217	0.0175446	2.71052e-13	-0.0981074	0.0178655	3.98668e-08	Not capture in EPIC methylation array
cg09761247	X	148585951	R	IDS	Body	0.227387	0.0316336	6.5682e-13	0.13631	0.0326369	2.95962e-05	0.0101	2.77e-20	0.0127	5.04e-55	Yes
cg08783090	X	151143125	R	GABRE	1stExon	-0.119243	0.0166455	7.8539e-13	-0.0774738	0.0166501	3.27076e-06	-0.0146	4.63e-56	-0.0119	7.22e-83	Yes
cg12054453	17	57915717	F	TMEM49	Body	0.219714	0.031172	1.80959e-12	0.176016	0.0324013	5.56062e-08	0.00987	1.54e-12	0.00598	1.23e-11	Yes
cg25888700	X	21676344	R	KLHL34	5'UTR	-0.107297	0.0153724	2.95543e-12	-0.0816716	0.0160616	3.67846e-07	-0.0136	5.9e-32	-0.0146	1.41e-76	Yes
cg05029625	X	64627755	R			-0.0985232	0.0142078	4.07812e-12	-0.076064	0.0144772	1.48782e-07	Not capture in EPIC methylation array
cg01828474	X	21676593	R	KLHL34	TSS200	-0.112324	0.0164323	8.16792e-12	-0.0893391	0.0169871	1.44659e-07	-0.0187	4.58e-49	-0.021	1.04e-148	Yes
cg17036062	X	25034037	F	ARX	1stExon	-0.0881354	0.0129327	9.43075e-12	-0.0578025	0.0132052	1.20177e-05	-0.0107	4.98e-22	-0.0104	4.27e-47	Yes
cg22055524	X	64254667	R			0.0846696	0.0125099	1.30405e-11	0.0769823	0.0130307	3.46835e-09	0.0018	0.0103	0.00106	0.0217	No
cg10356429	X	64627572	R			-0.120149	0.0178262	1.58333e-11	-0.11458	0.0181986	3.05206e-10	Not capture in EPIC methylation array
cg25988710	X	72667379	R	CDX4	1stExon	-0.114082	0.0170909	2.47214e-11	-0.0718184	0.0172631	3.17919e-05	-0.00702	1.96e-25	-0.00746	1.81e-59	Yes
cg17432350	X	64626876	R			-0.0984188	0.0148829	3.76894e-11	-0.0653481	0.0156519	2.97854e-05	Not capture in EPIC methylation array
cg06775759	X	21676994	R	KLHL34	TSS1500	-0.100961	0.0153075	4.23832e-11	-0.0879642	0.0158603	2.91956e-08	-0.0106	1.13e-43	-0.00682	9.67e-51	Yes
cg03671371	X	36975540	R			-0.113796	0.0172952	4.71627e-11	-0.0880504	0.018215	1.33846e-06	-0.0116	1.61e-36	-0.0131	1.07e-87	Yes
cg21773962	X	139586310	R	SOX3	1stExon	-0.103416	0.0158796	7.39008e-11	-0.0679247	0.0162245	2.83211e-05	Not capture in EPIC methylation array
cg20926353	9	84303358	F	TLE1	5'UTR	-0.0907993	0.0140797	1.12634e-10	-0.0619622	0.0140506	1.03403e-05	Not capture in EPIC methylation array
cg08814148	X	118407645	F			-0.135233	0.0212208	1.85777e-10	-0.136386	0.0213148	1.56771e-10	-0.0116	5.95e-35	-0.015	5.64e-111	Yes
cg16108684	X	125300035	F	DCAF12L2	TSS200	-0.11958	0.0190784	3.66052e-10	-0.0807869	0.0196725	4.01526e-05	-0.0161	3.99e-41	-0.0151	3.93e-78	Yes
cg20778411	X	37003920	R			-0.109222	0.0174878	4.22218e-10	-0.0636906	0.0176805	0.000315409	Not capture in EPIC methylation array
cg24823082	X	38660587	F	MID1IP1	TSS200	-0.149972	0.024025	4.31128e-10	-0.0928792	0.0255577	0.000278953	-0.007	2.75e-11	-0.0094	9.41e-32	Yes
cg25156485	X	64887827	R	MSN	Body	0.0767134	0.0123365	5.02167e-10	0.0797614	0.0125336	1.96802e-10	0.0037	3.1e-05	0.00256	2.85e-05	Yes
cg04424215	X	111325143	R	TRPC5	5'UTR	-0.129058	0.020893	6.53034e-10	-0.08454	0.0219515	0.000117535	-0.00409	6.69e-07	-0.00573	3.77e-20	Yes
cg14095100	9	84303413	R	TLE1	5'UTR	-0.127278	0.0206469	7.07108e-10	-0.100307	0.021187	2.1975e-06	Not capture in EPIC methylation array
cg25528646	X	151143302	R	GABRE	TSS200	-0.0919355	0.0149698	8.18057e-10	-0.0620104	0.0152205	4.61883e-05	-0.0151	3.27e-41	-0.0154	5.07e-82	Yes
cg24931094	X	119737891	R	MCTS1	5'UTR	0.0872326	0.0143788	1.30526e-09	0.0707837	0.0145352	1.11706e-06	0.00399	0.00014	0.00457	3.61e-11	Yes
cg12537796	X	106515818	R			-0.115924	0.0192912	1.86451e-09	-0.0861652	0.0193218	8.21582e-06	-0.00837	9.99e-19	-0.00762	2.74e-32	Yes
cg25127732	X	21676692	F	KLHL34	TSS1500	-0.0763729	0.0128392	2.70783e-09	-0.0450113	0.0126068	0.00035644	-0.00939	3.89e-24	-0.00999	9.45e-64	Yes
cg08100618	X	125686801	R	DCAF12L1	1stExon	-0.106271	0.0179576	3.26145e-09	-0.0934067	0.0190029	8.86093e-07	Not capture in EPIC methylation array
cg06373526	X	51139183	F			-0.0726974	0.0123102	3.51712e-09	-0.0457293	0.0124108	0.000229038	Not capture in EPIC methylation array
cg03202526	X	139587311	F	SOX3	TSS200	-0.0687481	0.0116506	3.61703e-09	-0.0507205	0.011724	1.51691e-05	-0.00371	0.000522	-0.00297	0.000378	Yes
cg11194545	X	105066793	F	NRK	5'UTR	-0.095005	0.0161525	4.05966e-09	-0.0816011	0.0166216	9.13861e-07	-0.0105	1.36e-27	-0.0118	7.89e-67	Yes
cg06358300	9	84302344	R	TLE1	Body	-0.11357	0.0194308	5.06937e-09	-0.0751238	0.0192463	9.48948e-05	Not capture in EPIC methylation array
cg17938879	X	148156001	F			-0.102068	0.0175155	5.63278e-09	-0.114169	0.0173292	4.45099e-11	Not capture in EPIC methylation array
cg06779802	X	107979401	F	IRS4	1stExon	-0.07991	0.0138388	7.72509e-09	-0.0675671	0.0139611	1.30053e-06	-0.0129	1.65e-27	-0.0137	9.22e-68	Yes
cg22606540	X	100914483	R	ARMCX2	5'UTR	-0.0965418	0.0169507	1.23059e-08	-0.0712359	0.0173073	3.85613e-05	-0.007	1.19e-11	-0.00925	2.68e-33	Yes
cg21729122	X	25034488	F	ARX	TSS1500	-0.0981822	0.0172813	1.33586e-08	-0.0778694	0.0180179	1.54768e-05	-0.00605	8.42e-12	-0.0064	6.02e-22	Yes
cg11073407	X	37004228	R			-0.0842791	0.0149366	1.67649e-08	-0.0627188	0.0149192	2.62353e-05	Not capture in EPIC methylation array
cg02295369	X	117959263	R	ZCCHC12	Body	-0.0873162	0.0158214	3.41178e-08	-0.0595423	0.0161536	0.000227806	-0.00881	8.91e-24	-0.00654	1.33e-25	Yes
cg23208903	X	30327487	F	NR0B1	5'UTR	-0.0866778	0.015763	3.82356e-08	-0.0601256	0.0162211	0.000210033	-0.00909	6.99e-28	-0.00975	6.07e-56	Yes
cg14586560	X	133118453	R	GPC3	Body	-0.0796082	0.0145463	4.43083e-08	-0.057968	0.0147176	8.19272e-05	-0.0047	2.85e-12	-0.0065	1.83e-40	Yes
cg04856605	X	69353178	R	IGBP1	TSS200	0.082431	0.0150724	4.52539e-08	0.0938686	0.0150942	5.00812e-10	0.0017	0.125	0.00219	0.0011	No
cg26289980	X	149106807	F	LOC100272228	Body	0.115983	0.0212749	4.99099e-08	0.0885048	0.0211081	2.7537e-05	0.00101	0.187	0.00125	0.0626	No
cg21040569	X	137793665	F	FGF13	Body	-0.0827832	0.0152096	5.24454e-08	-0.0544327	0.0157644	0.000554615	-0.0149	7.44e-45	-0.0132	4.93e-73	Yes
cg09407917	X	130192151	R	FLJ30058	TSS200	-0.0875646	0.0162041	6.52267e-08	-0.0720172	0.0170923	2.51514e-05	-0.00484	5.11e-07	-0.00467	4.19e-10	Yes
cg23949973	X	105065796	R	NRK	TSS1500	-0.109359	0.0203838	8.09376e-08	-0.103105	0.0210432	9.60056e-07	Not capture in EPIC methylation array

## Sheet: Table S5
Table S5: 126 (all autosomal) age-related CpGs were associated with survival of cancer overall.
CpG	CHR	MAPINFO	Strand	Gene	Gene feature	Model 4.1				Model 4.2
						HR	HR_l95	HR_u95	P	HR	HR_l95	HR_u95	P
cg26427498	7	105987258	R			0.780591	0.738946	0.824583	8.35108e-19	0.80386	0.760488	0.849705	1.20692e-14
cg26470501	19	45252955	F	BCL3	Body	0.802706	0.763567	0.843851	6.86831e-18	0.843325	0.801261	0.887597	6.67991e-11
cg25143652	20	62168670	R	PTK6	1stExon	0.764299	0.717029	0.814685	1.55569e-16	0.81187	0.760812	0.866355	3.19658e-10
cg01127300	22	38614796	F			0.821302	0.783128	0.861337	5.18591e-16	0.866722	0.82526	0.910266	1.07007e-08
cg08857221	1	37941361	R	ZC3H12A	Body	0.757073	0.707117	0.810558	1.34312e-15	0.784702	0.730001	0.843503	4.8204e-11
cg19572487	17	38476024	R	RARA	5'UTR	0.811798	0.769	0.856979	4.50825e-14	0.865805	0.81855	0.915788	4.85129e-07
cg02773019	3	135684688	F	PPP2R3A	5'UTR	1.20563	1.14815	1.26598	6.22028e-14	1.19634	1.13915	1.2564	7.33702e-13
cg15114651	19	47289410	F	SLC1A5	TSS1500	0.772979	0.722575	0.826898	7.15697e-14	0.832505	0.77665	0.892377	2.29723e-07
cg07069636	16	30671749	F			0.789003	0.741223	0.839864	1.04161e-13	0.845391	0.792814	0.901454	2.94675e-07
cg15962267	5	138612986	F	SNHG4	Body	0.772637	0.721504	0.827393	1.53845e-13	0.810869	0.752544	0.873714	3.69763e-08
cg02584867	19	1861099	R	KLF16	Body	0.830832	0.790938	0.872737	1.56073e-13	0.847443	0.806476	0.890491	5.83815e-11
cg09287933	6	33384473	R	CUTA	Body	0.750269	0.695158	0.809748	1.56453e-13	0.773737	0.715998	0.836131	8.98765e-11
cg03519879	14	74227499	R	C14orf43	5'UTR	0.774374	0.723136	0.829242	2.46197e-13	0.822468	0.76717	0.881752	3.71634e-08
cg12170787	19	1130965	R	SBNO2	Body	0.759746	0.705115	0.81861	5.31785e-13	0.796212	0.737574	0.859511	5.25609e-09
cg07148697	6	31323253	R	HLA-B	Body	0.762758	0.708609	0.821045	5.66627e-13	0.774974	0.718729	0.835619	3.31985e-11
cg26283141	6	33240471	F	VPS52	TSS1500	0.815371	0.770968	0.862331	9.03702e-13	0.837571	0.791341	0.886501	9.42349e-10
cg25264101	19	14064374	F	PODNL1	TSS200	0.843277	0.804487	0.883937	1.29406e-12	0.858727	0.818896	0.900494	3.26907e-10
cg05352838	6	33384391	R	CUTA	3'UTR	0.728503	0.666731	0.795999	2.43518e-12	0.758737	0.693776	0.82978	1.48421e-09
cg19513004	6	34206683	F	HMGA1	5'UTR	0.798544	0.749745	0.850518	2.69614e-12	0.82607	0.775679	0.879733	2.67674e-09
cg02003183	14	103415882	F	CDC42BPB	Body	1.20693	1.14466	1.27259	3.43028e-12	1.17052	1.10942	1.23499	8.60981e-09
cg23205886	5	138611766	F	SNHG4	Body	0.784768	0.732967	0.84023	3.48921e-12	0.824592	0.768783	0.884453	6.88832e-08
cg05668853	17	27044169	R	RAB34	Body	0.842389	0.802178	0.884616	6.28869e-12	0.874263	0.831124	0.919641	1.94196e-07
cg18474153	19	3984323	F	EEF2	Body	0.804419	0.755338	0.85669	1.23842e-11	0.833093	0.781233	0.888396	2.56523e-08
cg26486070	22	25003675	F	GGT1	5'UTR	0.85019	0.811075	0.891191	1.44004e-11	0.882183	0.841045	0.925334	2.67563e-07
cg04396998	19	49376722	R	PPP1R15A	Body	0.841219	0.799793	0.884792	1.93658e-11	0.864652	0.821493	0.910078	2.59382e-08
cg21711862	2	554363	F			0.78252	0.727957	0.841172	2.92546e-11	0.804589	0.747737	0.865763	6.05047e-09
cg01496720	10	3825398	R	KLF6	Body	0.855228	0.816667	0.895609	3.05592e-11	0.877134	0.837127	0.919054	3.71493e-08
cg03672272	22	46470191	R			0.779233	0.723843	0.838861	3.34191e-11	0.816202	0.758083	0.878777	7.09532e-08
cg14015015	6	35327915	F	PPARD	5'UTR	0.844666	0.803523	0.887915	3.44654e-11	0.860981	0.818669	0.90548	5.8198e-09
cg26912602	1	206644843	R	IKBKE	5'UTR	0.760441	0.701087	0.824821	3.97962e-11	0.803122	0.738836	0.873002	2.59525e-07
cg21446172	1	223745234	F	CAPN8	Body	0.85033	0.810102	0.892556	5.49329e-11	0.884718	0.841831	0.92979	1.35519e-06
cg08958747	16	2203176	R	RAB26	Body	0.797353	0.744594	0.85385	8.95399e-11	0.835527	0.779237	0.895883	4.42696e-07
cg05894970	3	119041204	F	CDGAP	Body	0.78628	0.731097	0.845627	9.38983e-11	0.813368	0.755853	0.87526	3.37428e-08
cg00947744	22	50945565	R	NCAPH2	TSS1500	0.845819	0.803999	0.889813	9.63523e-11	0.869452	0.825771	0.915444	1.04143e-07
cg05652328	17	7479977	F	EIF4A1	Body	0.832349	0.787345	0.879925	9.76242e-11	0.845772	0.798583	0.895749	1.07372e-08
cg10716120	1	2406721	F	PLCH2	TSS1500	0.83658	0.792294	0.883341	1.27502e-10	0.858995	0.812861	0.907748	6.79656e-08
cg16541026	3	49026934	R	P4HTM	TSS1500	0.851789	0.810717	0.894941	1.98887e-10	0.880371	0.836698	0.926323	9.19241e-07
cg22851200	7	100465833	R	TRIP6	Body	0.838151	0.79357	0.885236	2.42893e-10	0.869552	0.822456	0.919345	8.65169e-07
cg18625289	19	1591035	F	MBD3	Body	0.856526	0.816313	0.898719	2.74444e-10	0.861523	0.820121	0.905016	2.99578e-09
cg08147563	3	79028263	F	ROBO1	Body	0.8407	0.796568	0.887277	2.83983e-10	0.842473	0.797546	0.88993	8.75034e-10
cg17379828	19	55998732	F	NAT14	3'UTR	0.862963	0.824315	0.903423	2.88823e-10	0.874767	0.834665	0.916795	2.29161e-08
cg01971407	11	313624	R	IFITM1	TSS1500	0.834576	0.788925	0.882868	2.9616e-10	0.861813	0.813888	0.912561	3.49756e-07
cg02782634	17	57916643	F	TMEM49	Body	0.759514	0.696639	0.828064	4.39386e-10	0.777616	0.712244	0.848989	1.97696e-08
cg13966547	1	2406284	R	PLCH2	TSS1500	0.812221	0.760723	0.867206	4.86921e-10	0.833306	0.779016	0.891379	1.12478e-07
cg17501210	6	166970252	R	RPS6KA2	Body	0.84931	0.806594	0.894289	5.52279e-10	0.878386	0.833618	0.925558	1.18307e-06
cg25784280	18	32289350	F	DTNA	5'UTR	0.78032	0.721423	0.844026	5.82767e-10	0.793415	0.732976	0.858839	1.03873e-08
cg04338890	16	57019755	R			0.825914	0.777269	0.877604	6.59701e-10	0.831161	0.781642	0.883818	3.6184e-09
cg11341610	19	13050931	R	CALR	Body	0.828868	0.780743	0.87996	7.73666e-10	0.846127	0.796383	0.898979	6.47967e-08
cg06070002	1	45986120	R	PRDX1	5'UTR	0.867532	0.828981	0.907876	8.93229e-10	0.889608	0.849917	0.931152	5.0802e-07
cg26822572	22	50691611	F	MAPK12	3'UTR	0.85517	0.813219	0.899284	1.08377e-09	0.857421	0.814491	0.902614	4.36764e-09
cg21279603	21	46963527	R	SLC19A1	TSS1500	0.837764	0.791358	0.886891	1.13994e-09	0.865749	0.816383	0.9181	1.48956e-06
cg22747142	11	795582	R	SLC25A22	5'UTR	0.831754	0.783848	0.882588	1.15337e-09	0.842627	0.793583	0.894703	2.1858e-08
cg27182159	6	33241226	F	RPS18	Body	0.81456	0.76248	0.870198	1.16956e-09	0.845587	0.790804	0.904165	9.20132e-07
cg14333542	10	75647561	R			0.83776	0.791266	0.886987	1.22714e-09	0.850077	0.802311	0.900687	3.69197e-08
cg16411857	16	57023191	R	NLRC5	TSS1500	0.8611	0.820302	0.903926	1.55259e-09	0.874252	0.832108	0.918529	9.74853e-08
cg25496627	7	123177030	R			0.848582	0.804499	0.895081	1.61623e-09	0.857421	0.812863	0.90442	1.60693e-08
cg17933224	19	42774330	R			0.860697	0.819695	0.90375	1.7028e-09	0.872829	0.830498	0.917317	8.2073e-08
cg16989544	7	28666703	F	CREB5	Body	0.846608	0.801929	0.893777	1.74816e-09	0.856415	0.810484	0.904949	3.5629e-08
cg18789337	6	114180353	F	MARCKS	Body	1.16437	1.10765	1.224	2.33733e-09	1.15703	1.10041	1.21656	1.21104e-08
cg13306335	1	2345376	F	PEX10	TSS1500	0.867265	0.827626	0.908802	2.42474e-09	0.880069	0.838687	0.923492	2.0028e-07
cg01300096	6	33384490	R	CUTA	Body	0.771927	0.708721	0.840769	2.86342e-09	0.802296	0.735319	0.875374	7.31965e-07
cg18879828	11	46942432	F			0.83407	0.785412	0.885744	3.29601e-09	0.862658	0.812592	0.915808	1.27802e-06
cg19721221	1	181081214	F			0.821728	0.76922	0.877821	5.61021e-09	0.84388	0.789432	0.902084	6.09277e-07
cg11651446	1	24446746	F	IL22RA1	3'UTR	0.869059	0.828957	0.9111	5.79156e-09	0.880096	0.838849	0.923371	1.83408e-07
cg05513300	17	7345301	R	FGF11	Body	0.862097	0.820077	0.90627	5.87314e-09	0.87552	0.831858	0.921473	3.51589e-07
cg13153540	7	47128394	F			0.86483	0.823456	0.908283	6.39375e-09	0.885545	0.842942	0.9303	1.35101e-06
cg24263283	15	59587546	R	MYO1E	Body	0.861598	0.819217	0.906172	7.10171e-09	0.876632	0.833099	0.92244	4.04856e-07
cg04401876	19	45445449	R	APOC4	TSS200	0.814883	0.760133	0.873577	7.9805e-09	0.832996	0.776898	0.893144	2.79225e-07
cg14464245	9	139580482	F	AGPAT2	Body	0.772051	0.706914	0.84319	8.77938e-09	0.80406	0.735694	0.87878	1.50744e-06
cg15759721	17	57918630	F	MIR21	Body	0.751168	0.681266	0.828243	9.38727e-09	0.771155	0.697928	0.852066	3.3101e-07
cg06587435	16	865125	F			0.840658	0.792242	0.892033	9.74252e-09	0.85145	0.801481	0.904535	1.87231e-07
cg13562841	17	76121872	R	TMC6	Body	0.843945	0.796353	0.894382	1.00963e-08	0.864591	0.815626	0.916497	1.00115e-06
cg06473288	6	32820102	R	TAP1	Body	0.76466	0.697561	0.838213	1.02597e-08	0.79297	0.722507	0.870305	1.03032e-06
cg24797574	17	42988849	R	GFAP	Body	1.15362	1.09845	1.21156	1.09291e-08	1.1462	1.09105	1.20413	5.83787e-08
cg27664407	16	5116674	R	C16orf89	TSS1500	0.794197	0.733823	0.859538	1.11491e-08	0.796852	0.735945	0.8628	2.17276e-08
cg04255770	6	32804677	F	TAP2	Body	0.829165	0.777492	0.884274	1.15509e-08	0.841923	0.789042	0.898347	2.00343e-07
cg03296761	22	30822510	R	MTP18	Body	0.810884	0.75443	0.871564	1.24345e-08	0.834276	0.775515	0.897488	1.15936e-06
cg06390651	2	177023667	F			1.15545	1.09932	1.21444	1.29262e-08	1.1583	1.10142	1.21812	1.06289e-08
cg13984040	12	125258948	R			0.847933	0.801062	0.897547	1.3031e-08	0.860004	0.812238	0.910579	2.30342e-07
cg25970377	20	57089933	F	APCDD1L	5'UTR	1.15834	1.10079	1.2189	1.57134e-08	1.139	1.08193	1.19908	6.95953e-07
cg01076459	17	2908230	F	RAP1GAP2	Body	0.822067	0.767721	0.880261	1.96774e-08	0.838041	0.781643	0.898508	6.66789e-07
cg03962200	22	31518707	R	INPP5J	TSS1500	0.870277	0.829059	0.913543	1.99057e-08	0.871165	0.829412	0.915019	3.70998e-08
cg06126593	16	20910405	R	LYRM1	TSS1500	0.872198	0.831526	0.91486	1.99749e-08	0.882783	0.841489	0.926102	3.37884e-07
cg07249459	16	86600309	F	FOXC2	TSS1500	1.16151	1.10197	1.22426	2.4445e-08	1.15375	1.0943	1.21642	1.16275e-07
cg14270193	17	7079342	R	ASGR1	Body	0.845337	0.796863	0.896759	2.4502e-08	0.847197	0.79768	0.899787	6.79122e-08
cg21450529	2	27354194	R	PREB	3'UTR	0.877322	0.837808	0.918701	2.60275e-08	0.889668	0.848665	0.932652	1.19628e-06
cg21656937	12	54086662	F			0.858203	0.813134	0.90577	2.76109e-08	0.869795	0.822939	0.919319	7.91426e-07
cg18272461	1	960761	R	AGRN	Body	0.867475	0.82491	0.912237	3.05361e-08	0.873748	0.830405	0.919353	2.00107e-07
cg04006303	17	61934523	F	TCAM1	Body	0.868211	0.825754	0.912851	3.30344e-08	0.87314	0.829378	0.919211	2.32809e-07
cg11187245	6	31323397	F	HLA-B	Body	0.812252	0.754426	0.87451	3.41617e-08	0.828089	0.768049	0.892822	9.00682e-07
cg19928943	14	83767935	F			0.861431	0.816846	0.90845	3.77372e-08	0.859735	0.815146	0.906763	2.66601e-08
cg16371032	8	95654541	F	ESRP1	Body	1.15326	1.09603	1.21346	3.97984e-08	1.14788	1.08925	1.20966	2.52543e-07
cg01649611	2	43521066	R	THADA	Body	0.855941	0.809638	0.904893	4.20353e-08	0.870014	0.822449	0.92033	1.20826e-06
cg02780295	5	140855463	R	PCDHGA4	Body	1.15354	1.09606	1.21403	4.32063e-08	1.13927	1.08196	1.1996	7.35169e-07
cg08913523	8	126649807	F			0.841119	0.790596	0.894871	4.38903e-08	0.855524	0.803072	0.911403	1.33913e-06
cg27252325	12	49745406	R	DNAJC22	3'UTR	0.839315	0.788174	0.893774	4.72744e-08	0.848366	0.795264	0.905014	6.15347e-07
cg00232500	9	14910689	R	FREM1	TSS1500	0.845386	0.795926	0.89792	4.74608e-08	0.854706	0.804605	0.907927	3.50351e-07
cg12731568	11	67196864	F	RPS6KB2	Body	0.868968	0.82621	0.913938	4.87667e-08	0.876601	0.83291	0.922584	4.44126e-07
cg04866628	4	187026225	F			1.14069	1.08773	1.19622	5.71564e-08	1.15492	1.10055	1.21198	4.79747e-09
cg20540714	6	10415873	F	TFAP2A	Body	1.152	1.0945	1.21253	6.08789e-08	1.15044	1.09299	1.21091	8.24048e-08
cg00410034	22	32869991	R	FBXO7	TSS1500	0.875046	0.833722	0.918418	6.37448e-08	0.875993	0.834322	0.919745	1.01353e-07
cg19996355	19	19729375	R	PBX4	1stExon	1.13803	1.08588	1.19267	6.53952e-08	1.13296	1.08073	1.18771	2.16953e-07
cg20048109	7	78158112	R	MAGI2	Body	0.85825	0.811947	0.907192	6.58062e-08	0.863368	0.81605	0.913429	3.24401e-07
cg19040195	2	60687132	R	BCL11A	3'UTR	0.829463	0.775017	0.887734	6.74631e-08	0.838675	0.782567	0.898805	6.35911e-07
cg14308612	11	67161732	R	RAD9A	Body	0.878095	0.837595	0.920554	6.81451e-08	0.87711	0.83644	0.919758	6.19593e-08
cg09448652	11	62621367	R	SNORD30	TSS200	0.826626	0.771341	0.885874	7.00003e-08	0.839438	0.781861	0.901255	1.38045e-06
cg05949660	6	109777642	F	MICAL1	TSS1500	0.859335	0.812908	0.908413	8.80575e-08	0.858689	0.811491	0.908631	1.27826e-07
cg04907849	6	30459317	F	HLA-E	Body	0.820763	0.763404	0.882433	9.1055e-08	0.834915	0.775928	0.898385	1.38966e-06
cg02489908	17	6946086	R	SLC16A11	Body	1.14491	1.08944	1.20321	9.23808e-08	1.13291	1.07796	1.19066	8.69034e-07
cg00288824	15	26108663	R	ATP10A	TSS1500	1.14724	1.09067	1.20675	1.01528e-07	1.14163	1.08512	1.20107	3.15342e-07
cg00447376	4	3771818	R			0.876563	0.834843	0.920369	1.18885e-07	0.876606	0.834343	0.92101	1.75242e-07
cg12079303	1	61547163	R	NFIA	Body	0.867681	0.822379	0.915478	2.12699e-07	0.867123	0.821098	0.915727	2.99258e-07
cg05044173	12	6898500	R	CD4	TSS200	0.855115	0.805971	0.907257	2.18368e-07	0.856292	0.805737	0.910019	5.82574e-07
cg02769206	12	109210684	R	SSH1	Body	0.88433	0.84408	0.9265	2.31547e-07	0.888805	0.848092	0.931473	8.3362e-07
cg00474657	16	28989308	F	SPNS1	Body	0.841068	0.787466	0.898319	2.58309e-07	0.834888	0.780568	0.892988	1.46085e-07
cg22402467	12	7168056	R	C1S	1stExon	0.874006	0.830271	0.920046	2.72384e-07	0.873993	0.830138	0.920164	2.93172e-07
cg26309264	1	75600941	F	LHX8	Body	1.13945	1.0839	1.19784	3.0563e-07	1.13599	1.08012	1.19474	7.20308e-07
cg19730600	5	108088674	F	FER	5'UTR	0.875057	0.83097	0.921482	4.18488e-07	0.871934	0.827525	0.918725	2.77082e-07
cg24938956	19	4670603	F	C19orf10	TSS200	1.1329	1.07934	1.18911	4.4131e-07	1.13018	1.07655	1.18647	8.05478e-07
cg02254898	5	180074878	F	FLT4	Body	0.891674	0.852511	0.932635	5.63072e-07	0.891229	0.851545	0.932763	7.22897e-07
cg14667235	7	76026648	F	ZP3	TSS200	0.886874	0.845746	0.930002	7.2169e-07	0.888969	0.847587	0.932372	1.30412e-06
cg12275289	6	30691665	F	TUBB	Body	0.882144	0.838987	0.927521	9.58429e-07	0.880697	0.836785	0.926914	1.12525e-06
cg10278102	11	20410216	F	PRMT3	5'UTR	0.8878	0.846429	0.931193	1.01851e-06	0.886658	0.845587	0.929724	6.65172e-07
cg13326048	6	28641863	R			1.1359	1.07918	1.19561	1.08669e-06	1.14699	1.08885	1.20823	2.37535e-07
cg21640603	19	11310131	F	DOCK6	3'UTR	0.891924	0.851633	0.934121	1.2373e-06	0.887935	0.847304	0.930515	6.57426e-07
cg03288419	19	35225464	F	ZNF181	TSS200	1.13246	1.07686	1.19093	1.28085e-06	1.14085	1.08447	1.20015	3.46673e-07

## Sheet: Table S6
Table S6: Significant age-related CpGs with survival of gastric cancer (30 autosomal sites), lung cancer (282 autosomal and 1 X-linked) and mature B-cell lymphoma (1 autosomal site).
CpG	CHR	MAPINFO	Strand	Gene	Gene feature	Model 4.1				Model 4.2				Cancer
						HR	HR_l95	HR_u95	P	HR	HR_l95	HR_u95	P
cg04548483	8	145597148	R	ADCK5	TSS1500	1.91422	1.5564	2.3543	7.74879e-10	1.99949	1.59952	2.49947	1.16573e-09	Gastric
cg24242519	2	16846569	R	FAM49A	5'UTR	1.73618	1.45064	2.07792	1.76753e-09	1.85716	1.54193	2.23684	6.90297e-11	Gastric
cg12238343	5	33936402	F	RXFP3	TSS200	0.505058	0.403051	0.632882	2.95132e-09	0.522465	0.414935	0.657861	3.35517e-08	Gastric
cg00472281	5	1205496	R	SLC6A19	Body	1.83232	1.49698	2.24278	4.30575e-09	1.92101	1.56651	2.35572	3.55248e-10	Gastric
cg04605681	4	8229159	R	SH3TC1	Body	2.57116	1.85998	3.55427	1.08767e-08	2.6539	1.87889	3.7486	3.03598e-08	Gastric
cg18468844	1	28503720	R	PTAFR	TSS1500	2.1027	1.62752	2.71662	1.29604e-08	2.24463	1.71694	2.93452	3.35559e-09	Gastric
cg00926285	3	122398533	F	PARP14	TSS1500	0.495307	0.388761	0.631055	1.30612e-08	0.486664	0.379422	0.624217	1.4229e-08	Gastric
cg16932827	3	193988639	F			2.00221	1.5711	2.5516	2.00089e-08	2.05295	1.60602	2.62424	9.3513e-09	Gastric
cg09567725	16	85336621	F			0.576413	0.474114	0.700786	3.26002e-08	0.573587	0.463906	0.709199	2.84457e-07	Gastric
cg25602684	5	37839918	R	GDNF	TSS200	0.521029	0.412384	0.658298	4.64864e-08	0.439589	0.344709	0.560584	3.45739e-11	Gastric
ch.2.105901354F	2	106534922	F			0.601491	0.501154	0.721916	4.77398e-08	0.615301	0.518594	0.730041	2.59455e-08	Gastric
cg16400492	5	140306213	F	PCDHA7	Body	0.518788	0.408941	0.65814	6.43607e-08	0.516692	0.410311	0.650654	1.97682e-08	Gastric
cg20936321	1	8408752	F			2.0189	1.5597	2.6133	9.50047e-08	2.07	1.59924	2.67932	3.2623e-08	Gastric
cg27642062	16	55513148	R	MMP2	1stExon	0.543425	0.433443	0.681312	1.24986e-07	0.535977	0.424254	0.677121	1.70194e-07	Gastric
cg06664254	16	75628226	F			1.89712	1.49404	2.40894	1.48386e-07	1.89219	1.49527	2.39447	1.10041e-07	Gastric
cg21126943	19	42259395	F	CEACAM6	TSS200	3.27469	2.08802	5.13577	2.38392e-07	3.17754	1.99815	5.05307	1.03559e-06	Gastric
cg25106322	6	150311552	R			0.559587	0.448817	0.697697	2.48923e-07	0.538788	0.42931	0.676183	9.47918e-08	Gastric
cg18382926	1	1113624	F	TTLL10	TSS1500	1.63627	1.35431	1.97692	3.33883e-07	1.8584	1.52179	2.26948	1.21453e-09	Gastric
cg07426960	11	69469290	R			0.524027	0.408395	0.672399	3.7673e-07	0.489382	0.380161	0.629983	2.92265e-08	Gastric
cg16265140	1	3078206	R	PRDM16	Body	0.549196	0.435696	0.692262	3.89979e-07	0.555518	0.437322	0.705658	1.46276e-06	Gastric
cg12404831	2	192114017	F	MYO1B	5'UTR	2.35816	1.69024	3.29003	4.43685e-07	2.96881	2.10796	4.1812	4.71647e-10	Gastric
cg27337902	2	175581955	F			2.08907	1.56599	2.78687	5.43554e-07	2.40193	1.80241	3.20088	2.21568e-09	Gastric
cg18474081	12	89923541	R			1.75163	1.40622	2.18189	5.67149e-07	1.80518	1.44011	2.2628	2.99324e-07	Gastric
cg02086094	4	3769558	R	ADRA2C	1stExon	1.72978	1.39198	2.14954	7.66916e-07	1.83144	1.46134	2.29528	1.491e-07	Gastric
cg04028695	10	80008319	R			1.75242	1.39939	2.19452	1.02015e-06	1.84569	1.44166	2.36296	1.16226e-06	Gastric
cg14637411	11	2858355	F	KCNQ1	Body	1.61965	1.33336	1.9674	1.17885e-06	1.72675	1.41659	2.10482	6.38701e-08	Gastric
cg08571680	11	67407505	F	TBX10	TSS1500	0.572588	0.457226	0.717057	1.189e-06	0.559597	0.442521	0.707647	1.25e-06	Gastric
cg16409261	20	61703735	F			0.566935	0.450889	0.712848	1.19297e-06	0.530357	0.421687	0.667031	5.91539e-08	Gastric
cg16021428	5	7395395	F	ADCY2	TSS1500	0.47411	0.350063	0.642114	1.41798e-06	0.475153	0.351567	0.642183	1.28787e-06	Gastric
cg12208258	18	25757438	F	CDH2	1stExon	0.571968	0.455542	0.71815	1.5005e-06	0.551533	0.442504	0.687426	1.18809e-07	Gastric
cg00910067	19	33717545	R	SLC7A10	TSS1500	1.70892	1.48178	1.97089	1.78224e-13	1.69253	1.46346	1.95747	1.31824e-12	Lung
cg13130031	14	99584939	F			1.63122	1.42363	1.86908	1.84128e-12	1.69214	1.46588	1.95332	6.84766e-13	Lung
cg20297976	11	193062	R	SCGB1C1	TSS200	0.542748	0.456	0.645998	6.0789e-12	0.546476	0.455784	0.655214	6.73657e-11	Lung
cg09287933	6	33384473	R	CUTA	Body	0.458635	0.366835	0.573407	7.87917e-12	0.453415	0.358959	0.572726	3.21456e-11	Lung
cg26330479	1	1104257	R	MIR429	TSS200	0.560549	0.47421	0.662609	1.17974e-11	0.56539	0.477548	0.669389	3.60923e-11	Lung
cg00517855	8	146016408	R	RPL8	Body	0.626548	0.547199	0.717402	1.31292e-11	0.625106	0.543857	0.718493	3.74535e-11	Lung
cg16944977	2	29203230	F	FAM179A	TSS1500	0.593447	0.510066	0.690458	1.42925e-11	0.590362	0.505552	0.689399	2.727e-11	Lung
cg06893362	20	47897124	F	C20orf199	Body	0.506997	0.415603	0.618489	2.11742e-11	0.51403	0.419359	0.630072	1.47635e-10	Lung
cg07703358	7	138702117	R			1.53505	1.35157	1.74342	4.14192e-11	1.51773	1.32759	1.73509	9.99235e-10	Lung
cg25219329	22	42679444	F			1.58975	1.3844	1.82556	5.04981e-11	1.59791	1.38623	1.84193	1.01854e-10	Lung
cg05666607	5	145718405	R	POU4F3	TSS200	1.57665	1.37515	1.80767	6.7429e-11	1.5712	1.36662	1.8064	2.17307e-10	Lung
cg13446474	9	14349430	F			1.57069	1.36936	1.80161	1.10587e-10	1.5574	1.35052	1.79597	1.11258e-09	Lung
cg05809481	1	156696467	F	ISG20L2	Body	0.599464	0.513027	0.700464	1.184e-10	0.605085	0.516442	0.708942	5.09344e-10	Lung
cg11999488	12	55413659	R	NEUROD4	TSS200	1.53805	1.34835	1.75443	1.45161e-10	1.55968	1.35878	1.79028	2.65197e-10	Lung
cg12572625	5	140431039	F	PCDHB1	1stExon	1.67126	1.42798	1.95598	1.56688e-10	1.69855	1.44349	1.99868	1.75337e-10	Lung
cg06501716	22	19436948	R	C22orf39	TSS1500	0.465059	0.367517	0.588489	1.83365e-10	0.461191	0.361209	0.588847	5.37017e-10	Lung
cg03525049	8	75232650	R	JPH1	Body	1.67621	1.4293	1.96579	2.10851e-10	1.65944	1.4107	1.95204	9.78471e-10	Lung
cg03437186	7	45614848	R	ADCY1	Body	1.53867	1.34634	1.75847	2.52557e-10	1.51155	1.31666	1.73529	4.45993e-09	Lung
cg11580493	15	96873951	R	NR2F2	TSS200	1.54994	1.35251	1.7762	2.90834e-10	1.54442	1.33838	1.78219	2.69093e-09	Lung
cg06760467	6	29496514	F			0.562995	0.470652	0.673455	3.27565e-10	0.556051	0.461105	0.670549	8.06361e-10	Lung
cg24442760	11	49070637	F			1.48662	1.31302	1.68318	3.89224e-10	1.48045	1.30516	1.67929	1.04686e-09	Lung
cg19042947	14	95027441	F	SERPINA4	TSS1500	0.671862	0.593105	0.761076	4.05317e-10	0.679239	0.597035	0.77276	4.18105e-09	Lung
cg02046143	11	133797911	F	IGSF9B	Body	1.56062	1.35727	1.79443	4.13838e-10	1.55022	1.34405	1.78802	1.73355e-09	Lung
cg21858961	6	52148119	F	MCM3	Body	0.58757	0.49661	0.69519	5.76039e-10	0.59066	0.494988	0.704822	5.21841e-09	Lung
cg02352281	3	46139305	R			0.606497	0.517735	0.710476	5.86706e-10	0.604524	0.515124	0.709439	7.07929e-10	Lung
cg06958184	12	132963993	F			0.685739	0.608573	0.772691	5.87205e-10	0.686432	0.607906	0.775102	1.27801e-09	Lung
cg26327666	5	76937963	F			1.48384	1.30949	1.6814	6.089e-10	1.46854	1.29038	1.6713	5.76703e-09	Lung
cg13564533	8	55379081	F			1.55793	1.35376	1.7929	6.16571e-10	1.5772	1.36378	1.824	8.1086e-10	Lung
cg20319654	2	29121607	F	WDR43	Body	0.65984	0.578273	0.752912	6.58936e-10	0.667476	0.580486	0.767503	1.39363e-08	Lung
cg15835232	17	53343075	F	HLF	Body	1.49764	1.31643	1.7038	8.34547e-10	1.4886	1.3084	1.69362	1.50969e-09	Lung
cg15727463	5	174148519	F			1.47508	1.30246	1.67058	9.26356e-10	1.47332	1.29956	1.6703	1.42583e-09	Lung
cg18917544	6	99281070	F			1.50456	1.31919	1.71597	1.13201e-09	1.48688	1.30394	1.69548	3.17864e-09	Lung
cg03007309	14	103556656	F			0.594749	0.503085	0.703114	1.16758e-09	0.60204	0.507623	0.714019	5.53303e-09	Lung
cg05352838	6	33384391	R	CUTA	3'UTR	0.486281	0.384894	0.614375	1.50736e-09	0.489949	0.384233	0.624751	8.74871e-09	Lung
cg27391934	1	1369948	F	VWA1	TSS1500	1.57864	1.36117	1.83086	1.56646e-09	1.56741	1.34734	1.82343	5.80306e-09	Lung
cg15838320	20	49461129	R	BCAS4	Body	0.555546	0.458717	0.672815	1.79248e-09	0.554874	0.454445	0.677499	7.382e-09	Lung
cg23419635	4	180980684	F			1.54351	1.33887	1.77944	2.21412e-09	1.55819	1.34538	1.80466	3.22211e-09	Lung
cg19998328	19	11038320	F	YIPF2	Body	0.696869	0.618952	0.784595	2.3719e-09	0.698512	0.618933	0.788324	6.09603e-09	Lung
cg15032909	5	170726353	F	RANBP17	3'UTR	0.531968	0.432219	0.654737	2.55994e-09	0.539272	0.434996	0.668545	1.77414e-08	Lung
cg21868779	14	105444910	F	AHNAK2	TSS1500	1.56257	1.34912	1.80979	2.58521e-09	1.52761	1.31166	1.77911	5.07021e-08	Lung
cg09857273	8	95230984	R	CDH17	TSS1500	0.622193	0.53218	0.727431	2.65745e-09	0.625514	0.53379	0.732998	6.65912e-09	Lung
cg02842496	8	132053262	F	ADCY8	TSS1500	1.53334	1.33179	1.7654	2.76385e-09	1.52191	1.32223	1.75176	4.84612e-09	Lung
cg03698948	6	39760092	R	DAAM2	TSS1500	1.58356	1.36061	1.84304	2.8952e-09	1.5602	1.33633	1.82157	1.81424e-08	Lung
cg15166332	10	35929604	R	FZD8	1stExon	1.47362	1.29625	1.67526	3.11159e-09	1.48161	1.29291	1.69786	1.55073e-08	Lung
cg10364041	6	75915785	F	COL12A1	TSS200	1.51136	1.31834	1.73264	3.13338e-09	1.51349	1.31609	1.7405	6.16964e-09	Lung
cg25670685	13	102068432	F	NALCN	5'UTR	1.58875	1.36236	1.85275	3.57799e-09	1.58811	1.35661	1.85913	8.72121e-09	Lung
cg20736321	11	1029162	R	MUC6	Body	0.609278	0.516758	0.718363	3.71471e-09	0.618408	0.522254	0.732264	2.48794e-08	Lung
cg06655796	16	3220475	F			1.51799	1.32106	1.74429	3.92542e-09	1.48883	1.29168	1.71607	3.98206e-08	Lung
cg06273376	22	48972349	F	FAM19A5	Body	1.5606	1.34514	1.81057	4.31748e-09	1.54929	1.33039	1.80421	1.76804e-08	Lung
cg20805920	1	10533753	F	DFFA	TSS1500	0.695117	0.615598	0.784907	4.4273e-09	0.703102	0.618814	0.798871	6.42158e-08	Lung
cg05740045	8	65499926	F			1.52704	1.3256	1.75909	4.48737e-09	1.59634	1.3814	1.84472	2.31329e-10	Lung
cg05726935	14	105263522	F	AKT1	TSS1500	0.69557	0.615441	0.786132	6.11916e-09	0.68785	0.606192	0.780509	6.49902e-09	Lung
cg21558614	5	754184	F			0.571402	0.472876	0.690455	6.79216e-09	0.56355	0.464075	0.684347	7.12904e-09	Lung
cg04711162	19	30017511	F	VSTM2B	1stExon	1.44103	1.27333	1.63083	7.13429e-09	1.419	1.24996	1.61091	6.39124e-08	Lung
cg16167240	11	122852284	R	BSX	1stExon	1.51203	1.31439	1.73939	7.2487e-09	1.56076	1.35145	1.80248	1.36471e-09	Lung
cg09239144	11	123524633	R	SCN3B	1stExon	1.46203	1.28535	1.66301	7.46961e-09	1.44742	1.26895	1.65099	3.63561e-08	Lung
cg10006419	17	7323660	R	SPEM1	TSS200	0.655286	0.567734	0.756339	7.62454e-09	0.659433	0.568015	0.765564	4.53616e-08	Lung
cg00677866	20	61051685	R	GATA5	TSS1500	1.47019	1.2899	1.67568	7.751e-09	1.45776	1.2754	1.66621	3.24651e-08	Lung
cg14904305	8	12990898	F	DLC1	Body	1.53411	1.32652	1.77419	7.96796e-09	1.5587	1.34076	1.81206	7.64868e-09	Lung
cg05892568	19	30015782	R			1.46104	1.28423	1.6622	8.3578e-09	1.46419	1.28266	1.6714	1.64131e-08	Lung
cg23261640	11	70280489	F	CTTN	Body	0.675633	0.591223	0.772095	8.48203e-09	0.679602	0.593114	0.778702	2.67386e-08	Lung
cg13363454	12	71833613	R	LGR5	TSS200	1.4718	1.28976	1.67953	9.61337e-09	1.46285	1.27744	1.67518	3.7766e-08	Lung
cg02305377	12	103355958	R			1.54984	1.33434	1.80014	9.68388e-09	1.57349	1.34953	1.8346	7.17836e-09	Lung
cg15637465	5	168728270	R	SLIT3	TSS200	1.57025	1.34588	1.83202	9.69517e-09	1.57987	1.34774	1.85196	1.69128e-08	Lung
cg11474811	11	2443869	F	TRPM5	Body	0.60922	0.514278	0.721689	9.84311e-09	0.614743	0.515733	0.73276	5.62545e-08	Lung
cg26147554	18	712733	F	ENOSF1	TSS200	1.4305	1.26565	1.61681	9.96082e-09	1.4274	1.25946	1.61773	2.51706e-08	Lung
cg10855978	8	23780241	F			0.576302	0.477278	0.695871	1.00699e-08	0.587058	0.48535	0.710078	4.08243e-08	Lung
cg04368843	20	3660815	F	ADAM33	Body	0.633877	0.542253	0.740983	1.04348e-08	0.649501	0.551501	0.764916	2.32338e-07	Lung
cg15530658	8	6950038	F			1.56694	1.34275	1.82857	1.19094e-08	1.53601	1.31031	1.80059	1.20203e-07	Lung
cg13560871	1	220863766	R	C1orf115	1stExon	1.51793	1.31499	1.7522	1.20127e-08	1.50179	1.28622	1.7535	2.69073e-07	Lung
cg20063640	20	2635105	R	NOP56	Body	0.611035	0.515764	0.723905	1.22689e-08	0.618979	0.520549	0.736019	5.67498e-08	Lung
cg24118052	1	28919387	F	RAB42	5'UTR	1.58888	1.35364	1.86501	1.48074e-08	1.61525	1.36832	1.90674	1.47244e-08	Lung
cg05167251	2	176987465	R	HOXD9	5'UTR	1.55855	1.33659	1.81736	1.50243e-08	1.54392	1.31623	1.81098	9.52697e-08	Lung
cg05138957	14	101528123	R	MIR377	TSS1500	0.632478	0.539657	0.741265	1.53707e-08	0.641013	0.544663	0.754407	8.73476e-08	Lung
cg12396368	1	6294850	R	ICMT	Body	0.640057	0.548369	0.747077	1.54521e-08	0.649762	0.555176	0.760462	7.80623e-08	Lung
cg14308612	11	67161732	R	RAD9A	Body	0.676309	0.590549	0.774523	1.57421e-08	0.680152	0.592263	0.781083	4.76364e-08	Lung
cg00910695	8	109095568	R	RSPO2	1stExon	1.48991	1.29702	1.71148	1.73405e-08	1.48451	1.28452	1.71562	8.71251e-08	Lung
cg18464296	11	67372071	F			0.604888	0.50785	0.720467	1.75055e-08	0.604967	0.503695	0.726602	7.58034e-08	Lung
cg01205165	1	204119766	R	ETNK2	Body	0.684934	0.600353	0.78143	1.82814e-08	0.690976	0.602511	0.79243	1.23357e-07	Lung
cg02979001	14	105310421	F			1.57876	1.3466	1.85094	1.83367e-08	1.56867	1.33676	1.84081	3.46943e-08	Lung
cg26142132	17	74463585	R	AANAT	TSS200	0.694764	0.611942	0.788795	1.87298e-08	0.701513	0.615838	0.799107	9.5802e-08	Lung
cg04973925	15	49218062	F	SHC4	Body	0.543494	0.439406	0.672238	1.89363e-08	0.552256	0.44235	0.68947	1.56999e-07	Lung
cg15645728	1	4662148	R			0.604545	0.507187	0.72059	1.93607e-08	0.616414	0.514773	0.738124	1.41873e-07	Lung
cg22799321	7	93519621	R	TFPI2	Body	1.48302	1.29225	1.70195	2.02954e-08	1.49414	1.29616	1.72235	3.07652e-08	Lung
cg09619271	7	45961289	F	IGFBP3	TSS1500	1.55542	1.33293	1.81505	2.03729e-08	1.56641	1.33568	1.83699	3.38522e-08	Lung
cg04017533	18	55020099	R	ST8SIA3	1stExon	1.49834	1.29998	1.72696	2.39063e-08	1.48006	1.27411	1.71929	2.91352e-07	Lung
cg17820459	5	150400531	R	GPX3	Body	1.51191	1.30721	1.74867	2.55904e-08	1.48441	1.27732	1.72508	2.56738e-07	Lung
cg16668176	19	5308893	R	PTPRS	5'UTR	0.69417	0.610401	0.789434	2.64326e-08	0.702982	0.616892	0.801086	1.23965e-07	Lung
cg16196211	6	27261666	F			1.44292	1.2677	1.64234	2.83482e-08	1.43133	1.25437	1.63325	1.00384e-07	Lung
cg03884270	8	67834983	R	SNORD87	TSS200	0.574535	0.472421	0.698721	2.84488e-08	0.579816	0.474828	0.708017	8.89755e-08	Lung
cg16584573	10	103535637	R	FGF8	1stExon	1.46403	1.27966	1.67497	2.84503e-08	1.44413	1.25814	1.65762	1.74723e-07	Lung
cg01051545	1	61508955	F			1.45029	1.27177	1.65387	2.90097e-08	1.45093	1.26688	1.66172	7.52768e-08	Lung
cg02126051	3	147112438	F	ZIC4	Body	1.43194	1.26132	1.62564	2.91373e-08	1.44838	1.27207	1.64913	2.22125e-08	Lung
cg20311002	1	244763541	F	C1orf101	Body	0.500837	0.392168	0.639619	3.00686e-08	0.514905	0.399705	0.663306	2.79002e-07	Lung
cg06331300	7	20830702	F			1.4306	1.26039	1.6238	3.01253e-08	1.44213	1.26544	1.6435	4.01379e-08	Lung
cg11328436	12	54360511	F	HOTAIR	Body	1.5402	1.32197	1.79446	3.01485e-08	1.53589	1.31773	1.79017	4.02116e-08	Lung
cg26425256	2	119611362	F			1.49998	1.29939	1.73153	3.10024e-08	1.484	1.27887	1.72203	1.98413e-07	Lung
cg15756114	2	227515220	R			1.43658	1.26355	1.63329	3.15382e-08	1.4146	1.24031	1.61337	2.33491e-07	Lung
cg06866657	9	124990754	R	LHX6	Body	1.39089	1.23742	1.56339	3.178e-08	1.38299	1.22344	1.56334	2.16405e-07	Lung
cg10928294	17	41739326	R	MEOX1	TSS1500	0.606009	0.507454	0.723705	3.1845e-08	0.592462	0.490379	0.715794	5.77937e-08	Lung
cg22628240	1	235107837	F			0.592935	0.49257	0.713748	3.3107e-08	0.599678	0.495839	0.725263	1.35549e-07	Lung
cg09921610	4	41259866	F	UCHL1	Body	1.47699	1.28568	1.69676	3.57802e-08	1.46317	1.26953	1.68634	1.48071e-07	Lung
cg11658054	17	61988717	F	CSHL1	TSS200	0.684076	0.597609	0.783054	3.64869e-08	0.689958	0.601594	0.7913	1.11018e-07	Lung
cg07744912	16	3063680	R	CLDN9	1stExon	0.645347	0.552157	0.754265	3.70767e-08	0.651384	0.556227	0.762819	1.03699e-07	Lung
cg04816013	3	123987591	F	KALRN	Body	0.647796	0.554962	0.75616	3.76071e-08	0.635188	0.542277	0.744017	1.85791e-08	Lung
cg15690696	11	120217718	F	ARHGEF12	Body	0.584181	0.482254	0.707651	3.90975e-08	0.591683	0.483751	0.723695	3.27069e-07	Lung
cg04613834	16	12996419	R	SHISA9	1stExon	1.4342	1.26084	1.63138	4.09938e-08	1.43218	1.25493	1.63446	9.89093e-08	Lung
cg00950004	1	154165673	F	TPM3	TSS1500	0.621718	0.524566	0.736863	4.1983e-08	0.635515	0.53408	0.756214	3.22797e-07	Lung
cg04005707	4	48988321	R	CWH43	1stExon	1.50076	1.29793	1.7353	4.25627e-08	1.49653	1.2899	1.73625	1.04819e-07	Lung
cg25550425	5	178645682	F	ADAMTS2	Body	0.629694	0.533585	0.743113	4.40474e-08	0.642618	0.543735	0.759484	2.13472e-07	Lung
cg03011658	8	75893710	R			0.634053	0.538591	0.746434	4.43067e-08	0.644485	0.546048	0.760667	2.0477e-07	Lung
cg02833725	1	156696768	R	ISG20L2	1stExon	0.643889	0.549925	0.753909	4.50337e-08	0.633256	0.540236	0.742294	1.73453e-08	Lung
cg06085994	12	82152229	R	PPFIA2	5'UTR	1.5048	1.29974	1.7422	4.559e-08	1.49428	1.28961	1.73142	9.07727e-08	Lung
cg05977669	7	27225070	R	HOXA11AS	Body	1.61244	1.35857	1.91375	4.60742e-08	1.60728	1.34551	1.91997	1.67663e-07	Lung
cg09516210	1	2825189	F			0.619674	0.521837	0.735854	4.80163e-08	0.618375	0.518045	0.738135	1.02868e-07	Lung
cg19316148	1	31846089	F	FABP3	TSS200	1.58649	1.34417	1.87248	4.82419e-08	1.58543	1.33939	1.87665	8.49367e-08	Lung
cg13787438	3	26664115	R	LRRC3B	TSS200	1.43636	1.26105	1.63604	4.96631e-08	1.42864	1.2501	1.63267	1.62866e-07	Lung
cg11938367	3	197639960	F	IQCG	Body	0.633132	0.53712	0.746306	5.11064e-08	0.63611	0.538808	0.750983	9.24357e-08	Lung
cg06003656	5	166405676	R			1.69868	1.40374	2.0556	5.17024e-08	1.7286	1.42199	2.10133	3.92936e-08	Lung
cg06334284	1	57044991	R	PPAP2B	5'UTR	1.48071	1.28555	1.70551	5.23178e-08	1.45329	1.25966	1.67667	2.98574e-07	Lung
cg20699549	15	42567973	R	GANC	Body	0.664847	0.573955	0.770133	5.25644e-08	0.644456	0.55215	0.752194	2.5408e-08	Lung
cg05501617	4	185339075	R	IRF2	Body	0.616414	0.517738	0.733895	5.44541e-08	0.628082	0.525367	0.750878	3.31274e-07	Lung
cg20119148	19	18344195	R	PDE4C	5'UTR	1.4082	1.24454	1.59337	5.61361e-08	1.42294	1.2563	1.61169	2.84695e-08	Lung
cg11485154	11	46265393	F			1.50831	1.30027	1.74965	5.7175e-08	1.50516	1.28904	1.75751	2.33385e-07	Lung
cg27019126	18	56940693	R	RAX	TSS200	1.38909	1.23328	1.56458	6.14894e-08	1.3706	1.20762	1.55558	1.05762e-06	Lung
cg20388916	3	133682290	F	SLCO2A1	Body	0.556252	0.449729	0.688006	6.37402e-08	0.572401	0.458902	0.71397	7.49824e-07	Lung
cg03975694	19	38042472	R	ZNF540	5'UTR	1.42023	1.25024	1.61332	6.89977e-08	1.43762	1.25897	1.64162	8.25369e-08	Lung
cg05043886	3	11035079	R	SLC6A1	5'UTR	1.41102	1.24488	1.59934	7.16708e-08	1.39293	1.223	1.58647	5.9569e-07	Lung
cg20966659	3	126379474	F			0.645088	0.549683	0.757051	7.93794e-08	0.650999	0.551891	0.767904	3.5042e-07	Lung
cg06968164	13	45629698	F			0.58364	0.479366	0.710597	8.21866e-08	0.591042	0.481903	0.724897	4.44304e-07	Lung
cg06034513	22	37724709	R			0.665614	0.573536	0.772474	8.39478e-08	0.677963	0.581631	0.790249	6.67318e-07	Lung
cg08040428	8	18870913	R	PSD3	Body	1.49132	1.28835	1.72627	8.58913e-08	1.48699	1.28075	1.72645	1.90637e-07	Lung
cg10100437	1	223903862	R	CAPN2	Body	0.560045	0.452827	0.692649	8.93915e-08	0.553731	0.444696	0.6895	1.27051e-07	Lung
cg07632771	7	148611823	F			0.58146	0.476618	0.709365	9.04108e-08	0.586038	0.47584	0.721757	4.95403e-07	Lung
cg18164281	20	2797721	R	LOC100288797	3'UTR	0.647132	0.551672	0.75911	9.05537e-08	0.6461	0.545262	0.765586	4.52728e-07	Lung
cg08243931	5	34476633	R			0.585922	0.48154	0.71293	9.27857e-08	0.589098	0.481006	0.72148	3.11406e-07	Lung
cg04006303	17	61934523	F	TCAM1	Body	0.682061	0.592673	0.78493	9.35713e-08	0.679613	0.58941	0.783621	1.06047e-07	Lung
cg25309759	17	34068225	R	RASL10B	Body	1.44503	1.26223	1.6543	9.56965e-08	1.4157	1.2335	1.62481	7.59058e-07	Lung
cg19625088	5	87976156	F	LOC645323	Body	1.45745	1.26906	1.67382	9.6032e-08	1.43658	1.24503	1.65761	6.99223e-07	Lung
cg20711218	20	51110021	F			1.49359	1.28885	1.73085	9.63684e-08	1.49721	1.28707	1.74166	1.68827e-07	Lung
cg27511824	1	205470209	F			0.665545	0.573005	0.77303	9.80403e-08	0.674677	0.57873	0.786532	4.95408e-07	Lung
cg07639720	15	83952875	F	BNC1	Body	1.43137	1.25451	1.63318	9.84915e-08	1.3971	1.2208	1.59887	1.18151e-06	Lung
cg16704590	20	47896769	R	C20orf199	Body	0.657017	0.562963	0.766784	9.8815e-08	0.669404	0.570912	0.784886	7.69429e-07	Lung
cg15981195	9	2623146	R	FLJ35024	TSS1500	1.45702	1.26863	1.67339	9.91297e-08	1.44051	1.25064	1.65921	4.16259e-07	Lung
cg16560711	8	93977794	R	C8orf83	Body	1.53306	1.31008	1.79398	9.92202e-08	1.5199	1.29233	1.78754	4.21488e-07	Lung
cg07974511	2	63283013	F	OTX1	Body	1.45196	1.26579	1.66552	1.00073e-07	1.4442	1.25568	1.66102	2.59956e-07	Lung
cg18091264	15	66795595	R	SNORD18A	Body	0.65646	0.562115	0.76664	1.05527e-07	0.65064	0.555214	0.762467	1.08784e-07	Lung
cg02928699	11	88241946	R	GRM5	Body	1.49494	1.28891	1.73391	1.06992e-07	1.52907	1.311	1.78342	6.32868e-08	Lung
cg19109538	13	88325263	F	SLITRK5	5'UTR	1.58781	1.33865	1.88336	1.10284e-07	1.57525	1.3261	1.87122	2.30367e-07	Lung
cg25349373	12	5615527	F			0.651761	0.556481	0.763356	1.10368e-07	0.66591	0.566204	0.783174	8.95628e-07	Lung
cg26394624	5	102780588	F			0.659139	0.565076	0.768859	1.12118e-07	0.674587	0.575695	0.790466	1.1318e-06	Lung
cg13316854	2	177027856	F	HOXD3	TSS1500	1.47335	1.27659	1.70045	1.1664e-07	1.47338	1.27092	1.70809	2.76354e-07	Lung
cg06646548	10	77152949	R			0.659166	0.564965	0.769073	1.17578e-07	0.658623	0.562447	0.771243	2.15743e-07	Lung
cg15716847	5	133289054	R			0.726524	0.645454	0.817775	1.20668e-07	0.735282	0.649234	0.832734	1.28205e-06	Lung
cg15036326	17	27048708	F	RPL23A	Body	0.508427	0.395712	0.653249	1.22457e-07	0.517672	0.403002	0.664971	2.55395e-07	Lung
cg16616340	11	65712296	F	TSGA10IP	TSS1500	0.620985	0.520292	0.741166	1.30328e-07	0.63093	0.524593	0.758822	1.00441e-06	Lung
cg25227335	11	27528703	R	LIN7C	TSS1500	1.3299	1.1963	1.47842	1.30378e-07	1.31111	1.17596	1.4618	1.06009e-06	Lung
cg12655112	15	42261154	R	EHD4	Body	0.638875	0.540769	0.754779	1.38331e-07	0.644775	0.544953	0.762883	3.15764e-07	Lung
cg01943155	12	49121234	R	LOC255411	Body	0.661572	0.567297	0.771516	1.38613e-07	0.668803	0.571535	0.782624	5.25667e-07	Lung
cg06057566	13	78493561	R	EDNRB	TSS1500	1.47385	1.27549	1.70306	1.4454e-07	1.45648	1.25389	1.69179	8.61271e-07	Lung
cg01409693	4	1542171	R			0.571659	0.463977	0.704332	1.50739e-07	0.571772	0.464184	0.704297	1.47199e-07	Lung
cg23956036	11	16627172	R			1.46305	1.2693	1.68637	1.51973e-07	1.44429	1.24804	1.67139	8.06942e-07	Lung
cg07326413	15	78060295	F			0.735462	0.65574	0.824875	1.53027e-07	0.744648	0.663148	0.836164	6.17848e-07	Lung
cg00653387	7	137028535	F	PTN	5'UTR	1.33271	1.19717	1.48358	1.53041e-07	1.3193	1.18364	1.47052	5.57991e-07	Lung
cg13400248	7	35225412	F			1.47098	1.27343	1.69917	1.56197e-07	1.45866	1.25616	1.6938	7.39066e-07	Lung
cg14989661	3	38216354	F	OXSR1	Body	0.666808	0.573087	0.775856	1.57038e-07	0.657752	0.561454	0.770566	2.13665e-07	Lung
cg03476212	16	85301802	F			0.641135	0.542966	0.757053	1.58497e-07	0.651686	0.550006	0.772165	7.5199e-07	Lung
cg06163371	1	38230887	F	EPHA10	TSS200	1.44166	1.25738	1.65295	1.58658e-07	1.43069	1.24599	1.64276	3.80421e-07	Lung
cg20477147	20	57265991	R			0.685229	0.594908	0.789263	1.59186e-07	0.694646	0.600641	0.803365	9.04779e-07	Lung
cg26087117	19	53636229	F	ZNF415	TSS200	1.47408	1.27481	1.7045	1.63622e-07	1.49374	1.2903	1.72926	7.78852e-08	Lung
cg06921573	1	50889128	F	DMRTA2	1stExon	1.41242	1.24108	1.60742	1.66413e-07	1.38798	1.21574	1.58462	1.23559e-06	Lung
cg16817426	1	45807214	F	MUTYH	TSS1500	0.700297	0.612822	0.800259	1.66721e-07	0.69322	0.605238	0.793992	1.21496e-07	Lung
cg06647007	7	28747836	R	CREB5	Body	0.606536	0.502947	0.73146	1.66989e-07	0.617628	0.509277	0.749032	9.76846e-07	Lung
cg00664609	16	2198075	R	RAB26	TSS1500	1.69813	1.39259	2.07071	1.67486e-07	1.73151	1.4179	2.1145	7.24597e-08	Lung
cg12286573	17	42734503	R	C17orf104	Body	1.33429	1.19765	1.48652	1.67697e-07	1.32236	1.18301	1.47813	8.74457e-07	Lung
cg04850765	15	67135479	R			1.75218	1.42013	2.16186	1.67728e-07	1.7623	1.40974	2.20302	6.51093e-07	Lung
cg13966878	15	54270693	F			1.51551	1.29678	1.77114	1.7143e-07	1.49518	1.27064	1.75941	1.2663e-06	Lung
cg10068989	11	129244122	F			1.45514	1.26424	1.67487	1.71537e-07	1.46015	1.26662	1.68324	1.80749e-07	Lung
cg21415292	3	48467983	R	PLXNB1	5'UTR	0.695646	0.607147	0.797045	1.71768e-07	0.705073	0.614048	0.809591	7.23076e-07	Lung
cg15992284	1	91191254	R			1.52145	1.29987	1.78079	1.73258e-07	1.49692	1.27221	1.76131	1.16698e-06	Lung
cg23739862	12	3600666	R	PRMT8	1stExon	1.40253	1.23533	1.59235	1.75871e-07	1.38332	1.21514	1.57477	9.2752e-07	Lung
cg14858469	15	96874050	R	NR2F2	TSS200	1.49549	1.28586	1.73929	1.76002e-07	1.50149	1.28574	1.75345	2.81367e-07	Lung
cg01757312	13	112720565	R	SOX1	TSS1500	1.53494	1.30693	1.80273	1.76505e-07	1.49653	1.26979	1.76375	1.51337e-06	Lung
cg17397369	2	177502735	F			1.38993	1.22836	1.57275	1.76704e-07	1.39077	1.22551	1.57833	3.21049e-07	Lung
cg15460584	4	8540687	F			0.636211	0.536806	0.754024	1.81691e-07	0.634266	0.532401	0.755622	3.44887e-07	Lung
cg22988346	8	143618620	R	BAI1	Body	0.605441	0.501402	0.731066	1.82511e-07	0.615387	0.507627	0.746021	7.68377e-07	Lung
cg26834479	1	41327090	R	CITED4	3'UTR	1.39658	1.23184	1.58335	1.82814e-07	1.39015	1.21978	1.58433	7.88453e-07	Lung
cg15476790	2	218786102	F	TNS1	5'UTR	0.591967	0.486077	0.720924	1.84595e-07	0.607325	0.49724	0.741782	1.02179e-06	Lung
cg19579167	18	5543878	F	EPB41L3	5'UTR	1.42532	1.24753	1.62844	1.85119e-07	1.4105	1.22761	1.62063	1.20797e-06	Lung
cg06943309	1	163392482	R			0.661422	0.566203	0.772655	1.86586e-07	0.669936	0.572213	0.78435	6.37632e-07	Lung
cg13881199	1	231298177	F	TRIM67	TSS1500	1.43577	1.25316	1.64499	1.87244e-07	1.40983	1.22714	1.61972	1.22988e-06	Lung
cg11553308	2	236479382	R	AGAP1	Body	0.681347	0.589794	0.787111	1.8725e-07	0.681346	0.58823	0.789202	3.09688e-07	Lung
cg07964216	8	19796844	R	LPL	5'UTR	1.48255	1.27847	1.71922	1.87768e-07	1.45827	1.25673	1.69213	6.65096e-07	Lung
[truncated: 91 more rows]
